# Supplementary material for: Changes in Global Gene Expression in Response to Chemical and Genetic Perturbation of Chromatin Structure
Source: PLoS One. 2011 Jun 3;6(6):e20587. doi: 10.1371/journal.pone.0020587 (PMC3108824; doi:10.1371/journal.pone.0020587)
Supplement: Table S1 — Genes significantly up- or down-regulated in the ddm1 mutant. (XLSX) [file pone.0020587.s009.xlsx]

## Sheet: SuppTable1
Table S1. Genes significantly up- or down regulated in the ddm1 mutant (35)
Probe	Gene ID	log2 ddm1/WT	p-value	Gene Description
255356_x_at	AT2G10140;AT3G30680;AT4G03900;AT1G40123	7.15785	1.1e-05	[AT2G10140, transposable element gene];[AT3G30680, transposable element gene];[AT4G03900, transposable element gene];[AT1G40123, transposable element gene]
263819_x_at	AT2G10140	6.98356	9.8e-05	transposable element gene
257284_at	AT3G29650	6.54874	1e-06	transposable element gene
249114_at	AT5G43800	6.36772	8.5e-05	transposable element gene
246353_s_at	AT4G08010;AT1G39190;AT3G42721	6.26379	0	[AT4G08010, transposable element gene];[AT1G39190, transposable element gene];[AT3G42721, transposable element gene]
257898_s_at	AT5G45082;AT3G30670;AT1G35600;AT4G03910;AT3G32677;AT1G40125	6.14139	6.6e-05	[AT5G45082, transposable element gene];[AT3G30670, transposable element gene];[AT1G35600, transposable element gene];[AT4G03910, transposable element gene];[AT3G32677, transposable element gene];[AT1G40125, transposable element gene]
262031_x_at	AT1G37160	6.09508	6e-06	transposable element gene
256463_s_at	AT1G36190;AT3G32230	6.0505	0	[AT1G36190, transposable element gene];[AT3G32230, transposable element gene]
262008_s_at	AT5G45085;AT3G30680;AT4G03900;AT1G40123;AT1G35590	5.9782	1.7e-05	[AT5G45085, transposable element gene];[AT3G30680, transposable element gene];[AT4G03900, transposable element gene];[AT1G40123, transposable element gene];[AT1G35590, transposable element gene]
255313_at	AT4G04590	5.9674	3.7e-05	transposable element gene
260861_at	AT1G43840	5.7939	3e-06	transposable element gene
252436_x_at	AT5G44415;AT1G36080;AT1G23930;AT3G47330;AT4G09370	5.6091	5.1e-05	[AT5G44415, transposable element gene];[AT1G36080, transposable element gene];[AT1G23930, transposable element gene];[AT3G47330, transposable element gene];[AT4G09370, transposable element gene]
265524_at	AT2G06180	5.59664	5.6e-05	transposable element gene
257345_s_at	AT1G36540;AT3G33066;AT1G41700	5.45187	7e-06	[AT1G36540, transposable element gene];[AT3G33066, transposable element gene];[AT1G41700, transposable element gene]
245203_at	AT3G33080	5.36247	9e-06	transposable element gene
252695_s_at	AT1G36040;AT3G43640	5.28873	5.9e-05	[AT1G36040, transposable element gene];[AT3G43640, transposable element gene]
266152_s_at	AT3G32377;AT3G31908;AT2G12050	5.08789	4.5e-05	[AT3G32377, pseudogene, similar to aintegumenta-like protein, blastp match of 59% identity and 1.0e-09 P-value to GP|21304225|gb|AAL47210.1||AY062179 aintegumenta-like protein {Oryza sativa}];[AT3G31908, pseudogene, similar to aintegumenta-like protein, blastp match of 58% identity and 3.6e-07 P-value to GP|21304225|gb|AAL47210.1||AY062179 aintegumenta-like protein {Oryza sativa}];[AT2G12050, pse…
257292_s_at	AT3G15600;AT2G07770	5.0148	8e-06	[AT3G15600, transposable element gene];[AT2G07770, transposable element gene]
253707_at	AT4G29200	5.00225	2e-06	beta-galactosidase
255322_at	AT4G04270	4.98732	3.8e-05	transposable element gene
249259_at	AT5G41660	4.92315	9.8e-05	unknown protein
257777_x_at	AT3G29210	4.86047	0	transposable element gene
263346_at	AT2G05660	4.62761	2.1e-05	transposable element gene
246639_x_at	AT5G34895	4.37921	6e-05	transposable element gene
256448_s_at	AT4G04780;AT1G33450;AT5G15690	4.33414	7.4e-05	[AT4G04780, MED21 (MEDIATOR 21)];[AT1G33450, transposable element gene];[AT5G15690, INVOLVED IN: response to cadmium ion; EXPRESSED IN: cultured cell; BEST Arabidopsis thaliana protein match is: MED21 (MEDIATOR 21) (TAIR:AT4G04780.2); Has 53 Blast hits to 53 proteins in 6 species: Archae - 0; Bacteria - 2; Metazoa - 0; Fungi - 0; Plants - 47; Viruses - 4; Other Eukaryotes - 0 (source: NCBI BLink)…
255297_x_at	AT4G04820;AT2G12680;AT5G35025	4.1177	6.1e-05	[AT4G04820, transposable element gene];[AT2G12680, transposable element gene];[AT5G35025, transposable element gene]
251127_at	AT1G30784;AT5G01080	3.93829	4.2e-05	[AT1G30784, Pseudogene of AT5G01080; beta-galactosidase];[AT5G01080, beta-galactosidase]
246828_at	AT5G26350	3.8125	1e-06	transposable element gene
256686_at	AT3G32110	3.32193	6e-06	transposable element gene
263271_s_at	AT5G28970;AT2G11480;AT5G36030;AT4G19310;AT1G35110	1.38405	9.9e-05	[AT5G28970, transposable element gene];[AT2G11480, transposable element gene];[AT5G36030, transposable element gene];[AT4G19310, transposable element gene];[AT1G35110, transposable element gene]
263389_at	AT2G11680	1.28688	5e-05	transposable element gene
261600_x_at	AT1G49680;AT4G28870	1.28688	2.9e-05	[AT1G49680, unknown protein];[AT4G28870, unknown protein]
246869_at	AT5G26020	1.20789	6e-06	transposable element gene
265779_at	AT2G07360	0.411426	9.6e-05	SH3 domain-containing protein
265778_at	AT2G07360	0.389567	5.5e-05	SH3 domain-containing protein
