# Supplementary material for: Changes in Global Gene Expression in Response to Chemical and Genetic Perturbation of Chromatin Structure
Source: PLoS One. 2011 Jun 3;6(6):e20587. doi: 10.1371/journal.pone.0020587 (PMC3108824; doi:10.1371/journal.pone.0020587)
Supplement: Table S2 — Genes significantly upregulated after 5-AC treatment. (XLSX) [file pone.0020587.s010.xlsx]

## Sheet: SuppTable2
Table S2. Genes Significantly upregulated after 5-AC treatment (2525)
Probe	Gene ID	log2 5-AC/wt	p-value	Gene Description
251673_at	AT3G57240	8.56765	0	BG3 (BETA-1,3-GLUCANASE 3); cellulase/ hydrolase, hydrolyzing O-glycosyl compounds
245982_at	AT5G13170	7.94808	0.002226	SAG29 (SENESCENCE-ASSOCIATED PROTEIN 29)
252320_at	AT3G48580	7.72479	0.007044	xyloglucan:xyloglucosyl transferase, putative / xyloglucan endotransglycosylase, putative / endo-xyloglucan transferase, putative
251625_at	AT3G57260	7.70853	0.00885	BGL2 (BETA-1,3-GLUCANASE 2); cellulase/ glucan 1,3-beta-glucosidase/ hydrolase, hydrolyzing O-glycosyl compounds
256748_x_at	AT3G30396	7.63706	0.010994	transposable element gene
266769_s_at	AT1G18930;AT3G29440;AT3G44390;AT4G12426;AT3G47165;AT5G33315;AT5G26590;AT3G42883;AT1G12935;AT5G28466;AT2G03080;AT3G50490;AT2G04140;AT2G04130;AT5G56605;AT4G17820;AT4G20180	7.39806	0.000734	[AT1G18930, transposable element gene];[AT3G29440, transposable element gene];[AT3G44390, transposable element gene];[AT4G12426, transposable element gene];[AT3G47165, transposable element gene];[AT5G33315, transposable element gene];[AT5G26590, transposable element gene];[AT3G42883, transposable element gene];[AT1G12935, transposable element gene];[AT5G28466, transposable element gene];[AT2G0308…
256844_s_at	AT2G06720;AT3G31955;AT3G42720	7.37095	0.005292	[AT2G06720, transposable element gene];[AT3G31955, transposable element gene];[AT3G42720, transposable element gene]
265757_x_at	AT2G34130;AT4G02314;AT2G13160	7.32805	0.007845	[AT2G34130, transposable element gene];[AT4G02314, transposable element gene];[AT2G13160, transposable element gene]
260556_at	AT2G43620	7.24907	0.006427	chitinase, putative
251635_at	AT3G57510	7.22091	0.001646	ADPG1; polygalacturonase
261619_x_at	AT1G33130	7.16048	0.002887	transposable element gene
250286_at	AT5G13320	7.1419	0.002496	PBS3 (AVRPPHB SUSCEPTIBLE 3)
255986_x_at	AT5G35010	6.97269	0.008846	transposable element gene
263279_x_at	AT3G47260;AT2G14130	6.87725	0.005472	[AT3G47260, transposable element gene];[AT2G14130, transposable element gene]
260568_at	AT2G43570	6.82031	0.001466	chitinase, putative
248545_at	AT5G50260	6.77426	0.000488	cysteine proteinase, putative
263968_s_at	AT5G19015;AT1G42500;AT3G30780;AT2G12980;AT1G36260	6.68047	7e-06	[AT5G19015, transposable element gene];[AT1G42500, transposable element gene];[AT3G30780, transposable element gene];[AT2G12980, transposable element gene];[AT1G36260, transposable element gene]
252465_x_at	AT3G44500;AT3G47260;AT3G30440	6.65277	0.004414	[AT3G44500, transposable element gene];[AT3G47260, transposable element gene];[AT3G30440, transposable element gene]
265414_at	AT2G16660	6.48091	0.011868	nodulin family protein
266112_x_at	AT2G02210;AT3G47260	6.47135	0.005221	[AT2G02210, transposable element gene];[AT3G47260, transposable element gene]
247615_at	AT5G60250	6.41549	0.000455	zinc finger (C3HC4-type RING finger) family protein
252435_at	AT5G37385;AT3G47320;AT4G09380;AT2G23720;AT4G28970;AT5G44416	6.35738	0.000808	[AT5G37385, transposable element gene];[AT3G47320, transposable element gene];[AT4G09380, transposable element gene];[AT2G23720, transposable element gene];[AT4G28970, transposable element gene];[AT5G44416, transposable element gene]
259925_at	AT1G75040	6.35526	0.003665	PR5 (PATHOGENESIS-RELATED GENE 5)
259452_at	AT1G44060	6.2538	9.3e-05	transposable element gene
261235_x_at	AT1G32840	6.23936	0.000391	transposable element gene
253051_at	AT4G37490	6.17532	2.5e-05	CYCB1;1 (CYCLIN B1;1); cyclin-dependent protein kinase regulator
252634_x_at	AT4G04010;AT3G44500;AT3G30440	6.16491	0.00425	[AT4G04010, transposable element gene];[AT3G44500, transposable element gene];[AT3G30440, transposable element gene]
250142_at	AT5G14650	6.13258	0.001025	polygalacturonase, putative / pectinase, putative
266292_at	AT2G29350	6.12578	0.000655	SAG13; alcohol dehydrogenase/ oxidoreductase
266061_at	AT2G18720	6.09508	0.000207	GTP binding / GTPase/ serine-type peptidase/ translation factor, nucleic acid binding
257345_s_at	AT1G36540;AT3G33066;AT1G41700	6.09255	0.000296	[AT1G36540, transposable element gene];[AT3G33066, transposable element gene];[AT1G41700, transposable element gene]
265993_at	AT2G24160	6.05181	1.8e-05	pseudogene, leucine rich repeat protein family, contains leucine rich-repeat domains Pfam:PF00560, INTERPRO:IPR001611; contains some similarity to Cf-4 (Lycopersicon hirsutum) gi|2808683|emb|CAA05268; blastp match of 37% identity and 8.4e-98 P-value to GP|2808683|emb|CAA05268.1||AJ002235 Cf-4 {Lycopersicon hirsutum}
263358_x_at	AT3G44500;AT3G47260	6.04701	0.007102	[AT3G44500, transposable element gene];[AT3G47260, transposable element gene]
249495_at	AT5G39100	6.01547	0.000495	GLP6 (GERMIN-LIKE PROTEIN 6); manganese ion binding / nutrient reservoir
257186_at	AT3G13130	6.00764	0.000403	unknown protein
255363_x_at	AT2G06430;AT4G04010;AT3G44500;AT2G04980;AT2G02210	5.96463	0.000557	[AT2G06430, transposable element gene];[AT4G04010, transposable element gene];[AT3G44500, transposable element gene];[AT2G04980, transposable element gene];[AT2G02210, transposable element gene]
260741_at	AT1G15040	5.9607	0.000486	glutamine amidotransferase-related
263254_x_at	AT2G06430;AT4G04010;AT3G44500;AT2G02210	5.95675	0.000592	[AT2G06430, transposable element gene];[AT4G04010, transposable element gene];[AT3G44500, transposable element gene];[AT2G02210, transposable element gene]
264148_at	AT1G02220	5.94883	0.001011	ANAC003 (Arabidopsis NAC domain containing protein 3); transcription factor
253046_at	AT4G37370	5.91265	0.008803	CYP81D8; electron carrier/ heme binding / iron ion binding / monooxygenase/ oxygen binding
261065_at	AT1G07500	5.90159	0.000841	unknown protein
246640_x_at	AT5G34900	5.85773	0.008137	transposable element gene
254975_at	AT4G10500	5.81916	0.003482	oxidoreductase, 2OG-Fe(II) oxygenase family protein
262031_x_at	AT1G37160	5.80374	3e-06	transposable element gene
261892_at	AT1G80840	5.79051	0.004873	WRKY40; transcription factor
250798_at	AT5G05340	5.78947	0.006988	peroxidase, putative
255575_at	AT4G01430	5.77926	0.009521	nodulin MtN21 family protein
257110_x_at	AT3G30440	5.73037	0.003919	transposable element gene
255941_at	AT1G20350	5.7241	0.000664	ATTIM17-1; P-P-bond-hydrolysis-driven protein transmembrane transporter/ protein transporter
263948_at	AT2G35980	5.72383	0.010166	YLS9 (YELLOW-LEAF-SPECIFIC GENE 9)
266479_at	AT2G31160	5.70653	4.4e-05	LSH3 (LIGHT SENSITIVE HYPOCOTYLS 3)
254443_at	AT4G21070	5.67694	5.5e-05	ATBRCA1; ubiquitin-protein ligase
262549_at	AT1G31290	5.59962	0.011163	PAZ domain-containing protein / piwi domain-containing protein
259428_at	AT1G01560	5.58946	0.003488	ATMPK11; MAP kinase/ kinase
249114_at	AT5G43800	5.57016	0.000109	transposable element gene
259550_at	AT1G35230	5.56651	0.012112	AGP5 (ARABINOGALACTAN-PROTEIN 5)
245035_at	AT2G26400	5.54844	0.003252	ATARD3 (ACIREDUCTONE DIOXYGENASE 3); acireductone dioxygenase [iron(II)-requiring]/ heteroglycan binding / metal ion binding
255609_s_at	AT4G01180;AT5G59390	5.52356	1e-06	[AT4G01180, XH/XS domain-containing protein];[AT5G59390, XH/XS domain-containing protein]
255246_at	AT4G05640	5.51885	0.003851	transposable element gene
250143_at	AT5G14670	5.5097	3.3e-05	ATARFA1B (ADP-ribosylation factor A1B); GTP binding / phospholipase activator/ protein binding
257284_at	AT3G29650	5.4446	0.000243	transposable element gene
251400_at	AT3G60420	5.42593	0.001459	LOCATED IN: cellular_component unknown; EXPRESSED IN: 17 plant structures; EXPRESSED DURING: 10 growth stages; CONTAINS InterPro DOMAIN/s: Phosphoglycerate mutase (InterPro:IPR013078), PRIB5 (InterPro:IPR012398); BEST Arabidopsis thaliana protein match is: unknown protein (TAIR:AT3G60450.1); Has 181 Blast hits to 179 proteins in 72 species: Archae - 0; Bacteria - 53; Metazoa - 4; Fungi - 34; Plan…
254101_at	AT4G25000	5.3978	0.012056	AMY1 (ALPHA-AMYLASE-LIKE); alpha-amylase
248611_at	AT5G49520	5.38301	0.002684	WRKY48; transcription factor
253215_at	AT4G34950	5.36457	0.012495	nodulin family protein
249490_s_at	AT5G39110;AT5G39150;AT5G39120;AT5G39180	5.33593	2.6e-05	[AT5G39110, germin-like protein, putative];[AT5G39150, germin-like protein, putative];[AT5G39120, germin-like protein, putative];[AT5G39180, germin-like protein, putative]
260904_at	AT1G02450	5.32697	3.1e-05	NIMIN1 (NIM1-INTERACTING 1); protein binding
249917_at	AT5G22460	5.32012	0.003512	esterase/lipase/thioesterase family protein
266139_at	AT2G28085	5.29682	0.007361	auxin-responsive family protein
250646_at	AT5G06720	5.29131	0.006283	peroxidase, putative
245239_at	AT4G25530	5.28983	0.003509	FWA; DNA binding / protein binding / protein homodimerization/ transcription factor
256416_at	AT3G11050	5.23573	1.3e-05	ATFER2 (ferritin 2); binding / ferric iron binding / oxidoreductase/ transition metal ion binding
256538_x_at	AT3G32900	5.21645	0.000623	transposable element gene
256463_s_at	AT1G36190;AT3G32230	5.20906	0.002226	[AT1G36190, transposable element gene];[AT3G32230, transposable element gene]
264872_at	AT1G24260	5.20789	1e-06	SEP3 (SEPALLATA3); DNA binding / protein binding / transcription factor
248333_at	AT5G52390	5.19692	0.005454	photoassimilate-responsive protein, putative
261978_at	AT1G37060	5.19259	0.00102	transposable element gene
252436_x_at	AT5G44415;AT1G36080;AT1G23930;AT3G47330;AT4G09370	5.18349	0.000128	[AT5G44415, transposable element gene];[AT1G36080, transposable element gene];[AT1G23930, transposable element gene];[AT3G47330, transposable element gene];[AT4G09370, transposable element gene]
263336_x_at	no_match	5.17273	0.000142	no_match
263584_at	AT2G17040	5.16631	0.0003	anac036 (Arabidopsis NAC domain containing protein 36); transcription factor
253289_at	AT4G34320	5.15259	1.8e-05	unknown protein
257898_s_at	AT5G45082;AT3G30670;AT1G35600;AT4G03910;AT3G32677;AT1G40125	5.11395	0.000871	[AT5G45082, transposable element gene];[AT3G30670, transposable element gene];[AT1G35600, transposable element gene];[AT4G03910, transposable element gene];[AT3G32677, transposable element gene];[AT1G40125, transposable element gene]
256597_at	AT3G28500	5.11145	0.005583	60S acidic ribosomal protein P2 (RPP2C)
253776_at	AT4G28390	5.10434	7.9e-05	AAC3 (ADP/ATP CARRIER 3); ATP:ADP antiporter/ binding
251428_at	AT3G60140	5.09128	0.000214	DIN2 (DARK INDUCIBLE 2); catalytic/ cation binding / hydrolase, hydrolyzing O-glycosyl compounds
251612_at	AT3G57950	5.08704	3.4e-05	unknown protein
254287_at	AT4G22960	5.07211	0.001608	unknown protein
257763_s_at	AT3G23120;AT3G23110	5.07125	6e-06	[AT3G23120, AtRLP38 (Receptor Like Protein 38); kinase/ protein binding];[AT3G23110, AtRLP37 (Receptor Like Protein 37); kinase/ protein binding]
262704_at	AT1G16530	5.06867	0.005747	ASL9 (ASYMMETRIC LEAVES 2 LIKE 9)
252563_at	AT3G45970	5.04308	0.010163	ATEXLA1 (ARABIDOPSIS THALIANA EXPANSIN-LIKE A1)
256460_at	AT1G36240	5.03562	0.008028	60S ribosomal protein L30 (RPL30A)
248322_at	AT5G52760	5.0072	0.004225	heavy-metal-associated domain-containing protein
260046_at	AT1G73805	5.0063	0.001059	calmodulin binding
254396_at	AT4G21680	5.0018	0.010173	proton-dependent oligopeptide transport (POT) family protein
252862_at	AT4G39830	4.97957	0.006434	L-ascorbate oxidase, putative
245329_at	AT4G14365	4.96901	0.000498	zinc finger (C3HC4-type RING finger) family protein / ankyrin repeat family protein
255972_at	AT5G25615;AT3G29510	4.96532	0.002556	[AT5G25615, transposable element gene];[AT3G29510, transposable element gene]
247268_at	AT5G64080	4.94579	0.000686	protease inhibitor/seed storage/lipid transfer protein (LTP) family protein
246812_at	AT4G07523;AT1G43205;AT5G27180	4.94486	0.001373	[AT4G07523, transposable element gene];[AT1G43205, transposable element gene];[AT5G27180, transposable element gene]
266149_x_at	AT1G50850;AT2G12250	4.94392	3e-06	[AT1G50850, transposable element gene];[AT2G12250, transposable element gene]
252421_at	AT3G47540	4.9397	0.000136	chitinase, putative
258752_at	AT3G09520	4.90641	0.004036	ATEXO70H4 (exocyst subunit EXO70 family protein H4); protein binding
260919_at	no_match	4.89336	0.00081	no_match
263852_at	AT2G04450	4.85699	0.001929	ATNUDT6 (Arabidopsis thaliana Nudix hydrolase homolog 6); ADP-ribose diphosphatase/ NAD or NADH binding / hydrolase
261243_at	AT1G20180	4.8485	0.003619	unknown protein
256833_at	AT3G22910	4.8475	0.001373	calcium-transporting ATPase, plasma membrane-type, putative / Ca(2+)-ATPase, putative (ACA13)
249188_at	AT5G42830	4.82934	0.000187	transferase family protein
266545_at	AT2G35290	4.81404	1.6e-05	unknown protein
255313_at	AT4G04590	4.81198	0.000469	transposable element gene
252334_at	AT3G48850	4.79546	0.000403	mitochondrial phosphate transporter, putative
252004_at	AT3G52780	4.78764	0.003178	PAP20; acid phosphatase/ protein serine/threonine phosphatase
264433_at	AT1G61810	4.78084	0.001441	BGLU45 (BETA-GLUCOSIDASE 45); catalytic/ cation binding / hydrolase, hydrolyzing O-glycosyl compounds
255376_x_at	AT4G03790	4.75649	0.004944	transposable element gene
266352_at	AT2G01610	4.72028	0.002067	invertase/pectin methylesterase inhibitor family protein
263204_at	AT1G05490	4.66107	0.00011	chr31 (chromatin remodeling 31); ATP binding / DNA binding / helicase/ nucleic acid binding
263295_at	AT2G14210	4.64501	0.000643	AGL44 (AGAMOUS-LIKE 44); DNA binding / transcription factor
259743_at	AT1G71140	4.63691	1.3e-05	MATE efflux family protein
256940_at	AT3G30720	4.63285	0.004995	QQS (QUA-QUINE STARCH)
260136_at	AT1G66360	4.63227	0.004504	C2 domain-containing protein
248227_at	AT5G53820	4.62994	3.9e-05	unknown protein
248821_at	AT5G47070	4.6241	0.001871	protein kinase, putative
247105_at	AT5G66630	4.61235	0.000439	DAR5 (DA1-RELATED PROTEIN 5); zinc ion binding
247562_at	AT5G61120	4.60999	0.003996	INVOLVED IN: biological_process unknown; EXPRESSED IN: 8 plant structures; EXPRESSED DURING: 6 growth stages; BEST Arabidopsis thaliana protein match is: nucleic acid binding (TAIR:AT5G61090.1); Has 77 Blast hits to 70 proteins in 8 species: Archae - 0; Bacteria - 0; Metazoa - 20; Fungi - 0; Plants - 56; Viruses - 0; Other Eukaryotes - 1 (source: NCBI BLink).
263498_at	AT2G42610	4.60348	0.007362	LSH10 (LIGHT SENSITIVE HYPOCOTYLS 10)
245422_at	AT4G17470	4.59813	0.009459	palmitoyl protein thioesterase family protein
246054_at	AT5G08360	4.58736	0.001009	unknown protein
251372_at	AT3G60520	4.57652	6.8e-05	unknown protein
261966_x_at	AT1G36470;AT2G10630;AT1G50860;AT2G12260	4.5509	0.00113	[AT1G36470, transposable element gene];[AT2G10630, transposable element gene];[AT1G50860, transposable element gene];[AT2G12260, transposable element gene]
252131_at	AT3G50930	4.54102	0.000657	BCS1 (CYTOCHROME BC1 SYNTHESIS); ATP binding / ATPase/ nucleoside-triphosphatase/ nucleotide binding
252347_at	AT3G48130	4.53667	0.000796	ribosomal protein L13 homolog
246988_at	AT5G67340	4.53356	0.00431	armadillo/beta-catenin repeat family protein / U-box domain-containing protein
252539_at	AT3G45730	4.52857	0.001606	unknown protein
257777_x_at	AT3G29210	4.52042	0.002265	transposable element gene
259489_at	AT1G15790	4.51349	0.006228	unknown protein
247051_at	AT5G66670	4.51096	0.001273	unknown protein
252417_at	AT3G47480	4.5008	0.007007	calcium-binding EF hand family protein
259124_at	AT3G02310	4.48671	0.00181	SEP2 (SEPALLATA 2); DNA binding / protein binding / transcription factor
266544_at	AT2G35300	4.47314	5e-06	late embryogenesis abundant group 1 domain-containing protein / LEA group 1 domain-containing protein
260648_at	AT1G08050	4.46205	0.00017	zinc finger (C3HC4-type RING finger) family protein
256073_at	AT1G18100	4.4614	0.006246	E12A11; phosphatidylethanolamine binding
266373_x_at	AT3G31970;AT2G14650;AT1G42605;AT4G10580	4.45878	0.001709	[AT3G31970, transposable element gene];[AT2G14650, transposable element gene];[AT1G42605, transposable element gene];[AT4G10580, transposable element gene]
252515_at	AT3G46230	4.45878	0.0003	ATHSP17.4
250415_at	AT5G11210	4.45154	0.004572	ATGLR2.5; intracellular ligand-gated ion channel
262271_x_at	AT1G42370;AT1G42360	4.4489	0.004097	[AT1G42370, transposable element gene];[AT1G42360, transposable element gene]
248722_at	AT5G47810	4.44692	0.000142	PFK2 (PHOSPHOFRUCTOKINASE 2); 6-phosphofructokinase
250709_at	AT5G06080	4.44162	0.003685	LBD33 (LOB DOMAIN-CONTAINING PROTEIN 33)
250722_at	AT5G06190	4.42492	6.1e-05	unknown protein
260522_x_at	AT2G41730	4.42291	0.006091	unknown protein
262132_at	AT1G02830	4.41481	0.009588	60S ribosomal protein L22 (RPL22A)
254985_x_at	AT1G42605;AT4G10580	4.40871	0.007801	[AT1G42605, transposable element gene];[AT4G10580, transposable element gene]
263479_x_at	AT2G04000	4.38128	2e-06	transposable element gene
256780_at	AT3G13640	4.36527	0.003237	ATRLI1; transporter
255345_at	AT4G04460	4.36387	0.001705	aspartyl protease family protein
267026_at	AT2G38340	4.35966	0.007864	AP2 domain-containing transcription factor, putative (DRE2B)
267267_at	AT2G02580	4.35826	0.004301	CYP71B9; electron carrier/ heme binding / iron ion binding / monooxygenase/ oxygen binding
257292_s_at	AT3G15600;AT2G07770	4.34837	5e-06	[AT3G15600, transposable element gene];[AT2G07770, transposable element gene]
254265_s_at	AT4G23140;AT4G23160	4.33985	0.003623	[AT4G23140, CRK6 (CYSTEINE-RICH RLK 6); kinase];[AT4G23160, protein kinase family protein]
249889_at	AT5G22540	4.33414	0.001723	unknown protein
256012_at	AT1G19250	4.32697	0.00347	FMO1 (FLAVIN-DEPENDENT MONOOXYGENASE 1); FAD binding / NADP or NADPH binding / electron carrier/ flavin-containing monooxygenase/ monooxygenase/ oxidoreductase
255356_x_at	AT2G10140;AT3G30680;AT4G03900;AT1G40123	4.32409	0.000647	[AT2G10140, transposable element gene];[AT3G30680, transposable element gene];[AT4G03900, transposable element gene];[AT1G40123, transposable element gene]
267317_at	AT2G34700	4.32121	0.003438	pollen Ole e 1 allergen and extensin family protein
246228_at	AT4G36430	4.31904	0.003632	peroxidase, putative
253707_at	AT4G29200	4.31034	0.000523	beta-galactosidase
263783_at	AT2G46400	4.30597	2e-05	WRKY46; transcription factor
260623_at	AT1G08090	4.29572	0.011378	ATNRT2:1 (NITRATE TRANSPORTER 2:1); nitrate transmembrane transporter
265842_at	AT2G35700	4.28318	0.001978	ERF38 (ERF FAMILY PROTEIN 38); DNA binding / transcription factor
257600_at	AT3G24770	4.28021	0.002052	CLE41 (CLAVATA3/ESR-RELATED 41); protein binding / receptor binding
266320_at	AT2G46640	4.27352	0.000127	unknown protein
266511_at	AT2G47680	4.27277	6.4e-05	zinc finger (CCCH type) helicase family protein
257839_at	AT3G25080	4.26454	0.001121	unknown protein
262154_at	AT1G52700	4.26303	0.001229	phospholipase/carboxylesterase family protein
258984_at	AT3G08970	4.25399	0.000126	ATERDJ3A; oxidoreductase
250024_at	AT5G18270	4.23113	0.000993	ANAC087; transcription factor
255521_at	AT4G02280	4.20163	9e-06	SUS3 (sucrose synthase 3); UDP-glycosyltransferase/ sucrose synthase/ transferase, transferring glycosyl groups
267384_at	AT2G44370	4.20163	0.002715	DC1 domain-containing protein
246821_at	AT5G26920	4.20006	0.000313	CBP60G (CAM-BINDING PROTEIN 60-LIKE.G); calmodulin binding
260560_at	AT2G43590	4.19849	0.003437	chitinase, putative
257035_at	AT3G19270	4.18982	0.004353	CYP707A4; (+)-abscisic acid 8'-hydroxylase/ oxygen binding
248593_at	AT5G49180	4.18824	0.009264	pectinesterase family protein
260861_at	AT1G43840	4.18507	0.003124	transposable element gene
248870_at	AT5G46710	4.18349	0.000194	zinc-binding family protein
264823_at	AT1G03445	4.1811	0.004875	BSU1 (BRI1 SUPPRESSOR 1); protein serine/threonine phosphatase
263819_x_at	AT2G10140	4.17393	0.000713	transposable element gene
265559_at	AT2G05530	4.16511	0.001505	glycine-rich protein
256989_at	AT3G28580	4.16269	0.000285	AAA-type ATPase family protein
250660_at	AT5G07060	4.15785	0.00159	zinc finger (CCCH-type) family protein
250832_at	AT5G04950	4.15543	0.003823	NAS1 (NICOTIANAMINE SYNTHASE 1); nicotianamine synthase
256845_x_at	AT3G31970;AT1G42605	4.14649	0.003485	[AT3G31970, transposable element gene];[AT1G42605, transposable element gene]
260405_at	AT1G69930	4.14486	0.002078	ATGSTU11 (GLUTATHIONE S-TRANSFERASE TAU 11); glutathione transferase
253744_s_at	AT5G44415;AT5G33230;AT4G28960;AT5G37390;AT1G23930;AT3G47330;AT4G09370	4.1416	1.1e-05	[AT5G44415, transposable element gene];[AT5G33230, transposable element gene];[AT4G28960, transposable element gene];[AT5G37390, transposable element gene];[AT1G23930, transposable element gene];[AT3G47330, transposable element gene];[AT4G09370, transposable element gene]
255524_at	AT4G02330	4.13175	0.00569	ATPMEPCRB; pectinesterase
259251_at	AT3G07600	4.12846	0.011137	heavy-metal-associated domain-containing protein
258760_at	AT3G10780	4.12102	0.000248	emp24/gp25L/p24 family protein
260561_at	AT2G43580	4.10685	0.001256	chitinase, putative
248083_at	no_match	4.10182	0.011395	no_match
257579_at	AT3G11000	4.09339	4.1e-05	LOCATED IN: endomembrane system; EXPRESSED IN: 9 plant structures; EXPRESSED DURING: 6 growth stages; CONTAINS InterPro DOMAIN/s: Development and cell death domain (InterPro:IPR013989), Kelch related (InterPro:IPR013089); BEST Arabidopsis thaliana protein match is: unknown protein (TAIR:AT5G01660.1); Has 173 Blast hits to 164 proteins in 29 species: Archae - 0; Bacteria - 6; Metazoa - 2; Fungi - …
250180_at	AT5G14450	4.09255	0.000615	GDSL-motif lipase/hydrolase family protein
255500_at	AT4G02390	4.08151	0.000456	APP (ARABIDOPSIS POLY(ADP-RIBOSE) POLYMERASE); NAD+ ADP-ribosyltransferase/ nucleic acid binding
253999_at	AT4G26200	4.07553	0.007087	ACS7; 1-aminocyclopropane-1-carboxylate synthase
258288_at	no_match	4.07382	0.000932	no_match
256448_s_at	AT4G04780;AT1G33450;AT5G15690	4.06437	0.000578	[AT4G04780, MED21 (MEDIATOR 21)];[AT1G33450, transposable element gene];[AT5G15690, INVOLVED IN: response to cadmium ion; EXPRESSED IN: cultured cell; BEST Arabidopsis thaliana protein match is: MED21 (MEDIATOR 21) (TAIR:AT4G04780.2); Has 53 Blast hits to 53 proteins in 6 species: Archae - 0; Bacteria - 2; Metazoa - 0; Fungi - 0; Plants - 47; Viruses - 4; Other Eukaryotes - 0 (source: NCBI BLink)…
256942_at	AT3G23290	4.06264	0.000119	LSH4 (LIGHT SENSITIVE HYPOCOTYLS 4)
265597_at	AT2G20142	4.04002	0.0021	transmembrane receptor
251652_at	AT3G57380	4.03034	0.001151	transferase, transferring glycosyl groups
265725_at	AT2G32030	4.01703	0.000136	GCN5-related N-acetyltransferase (GNAT) family protein
261016_at	AT1G26560	4.01346	0.000437	BGLU40 (BETA GLUCOSIDASE 40); catalytic/ cation binding / hydrolase, hydrolyzing O-glycosyl compounds
267567_at	AT2G30770	4.00809	0.004896	CYP71A13 (cytochrome P450, family 71, subfamily A, polypeptide 13); indoleacetaldoxime dehydratase/ oxygen binding
265652_x_at	AT2G13890	4.0027	0.001322	transposable element gene
254419_at	AT4G21490	3.99729	0.006672	NDB3; NADH dehydrogenase
255340_at	AT4G04490	3.9855	0.00177	protein kinase family protein
259387_at	AT1G13370	3.98003	0.001298	histone H3, putative
247093_at	AT5G66350	3.97728	0.007686	SHI (SHORT INTERNODES); protein binding / protein heterodimerization/ transcription factor
254786_at	AT4G12890	3.97177	0.005267	gamma interferon responsive lysosomal thiol reductase family protein / GILT family protein
247951_at	AT5G57240	3.96809	0.008027	ORP4C (OSBP(OXYSTEROL BINDING PROTEIN)-RELATED PROTEIN 4C); oxysterol binding
263096_at	AT2G16060	3.96625	0.008406	AHB1 (ARABIDOPSIS HEMOGLOBIN 1); oxygen binding / oxygen transporter
266849_at	AT2G25940	3.9644	0.00036	ALPHA-VPE (alpha-vacuolar processing enzyme); cysteine-type endopeptidase
248668_at	AT5G48720	3.9542	0.001171	XRI1 (X-RAY INDUCED TRANSCRIPT 1)
256442_at	AT3G10930	3.94953	1e-06	unknown protein
255768_at	AT1G16705	3.9486	0.004156	p300/CBP acetyltransferase-related protein-related
262478_at	AT1G11170	3.94579	0.006806	unknown protein
252495_at	AT3G46770	3.93829	0.001022	transcriptional factor B3 family protein
251035_at	AT5G02220	3.93263	8e-06	unknown protein
258894_at	AT3G05650	3.92979	0.003219	AtRLP32 (Receptor Like Protein 32); kinase/ protein binding
257735_at	AT3G27400	3.92979	0.006885	pectate lyase family protein
265672_at	AT2G31980	3.926	0.002607	cysteine proteinase inhibitor-related
248918_at	AT5G45890	3.9241	0.004051	SAG12 (SENESCENCE-ASSOCIATED GENE 12); cysteine-type peptidase
262072_at	AT1G59590	3.90593	3.6e-05	ZCF37
256367_at	AT1G66810	3.89821	0.001044	zinc finger (CCCH-type) family protein
251354_at	AT3G61090	3.8953	0.000447	unknown protein
260170_at	AT1G71890	3.88362	0.000464	SUC5; carbohydrate transmembrane transporter/ sucrose:hydrogen symporter/ sugar:hydrogen symporter
267069_at	AT2G41010	3.87676	0.00882	ATCAMBP25 (ARABIDOPSIS THALIANA CALMODULIN (CAM)-BINDING PROTEIN OF 25 KDA); calmodulin binding
246944_at	AT5G25450	3.87578	0.000604	ubiquinol-cytochrome C reductase complex 14 kDa protein, putative
250062_at	AT5G17760	3.86888	0.000573	AAA-type ATPase family protein
246341_x_at	AT3G43150	3.86493	0.002049	unknown protein
252466_x_at	AT3G47270;AT1G32830	3.83086	0.002486	[AT3G47270, transposable element gene];[AT1G32830, transposable element gene]
266680_s_at	AT2G19850;AT3G54730	3.82782	0.003489	[AT2G19850, FUNCTIONS IN: molecular_function unknown; INVOLVED IN: biological_process unknown; BEST Arabidopsis thaliana protein match is: OFP9 (ARABIDOPSIS THALIANA OVATE FAMILY PROTEIN 9) (TAIR:AT4G04030.1); Has 24 Blast hits to 18 proteins in 6 species: Archae - 0; Bacteria - 0; Metazoa - 4; Fungi - 0; Plants - 15; Viruses - 3; Other Eukaryotes - 2 (source: NCBI BLink).];[AT3G54730, unknown pr…
259831_at	AT1G69600	3.8268	0.002787	ZFHD1 (ZINC FINGER HOMEODOMAIN 1); DNA binding / transcription activator/ transcription factor
249890_at	AT5G22570	3.80426	0.010287	WRKY38; transcription factor
265449_at	AT2G46610	3.80012	0.004687	arginine/serine-rich splicing factor, putative
262911_s_at	AT1G59860;AT1G07400	3.78764	0.001087	[AT1G59860, 17.6 kDa class I heat shock protein (HSP17.6A-CI)];[AT1G07400, 17.8 kDa class I heat shock protein (HSP17.8-CI)]
251054_at	AT5G01540	3.78136	0.005855	LECRKA4.1 (LECTIN RECEPTOR KINASE A4.1); kinase
264543_at	AT1G55780	3.77926	0.007257	metal ion binding
266140_at	AT2G28120	3.77083	0.002843	nodulin family protein
251455_at	AT3G60100	3.75275	0.004239	CSY5 (citrate synthase 5); citrate (SI)-synthase/ transferase, transferring acyl groups, acyl groups converted into alkyl on transfer
256188_at	AT1G30160	3.75168	0.000318	unknown protein
260978_at	AT1G53540	3.74953	5.3e-05	17.6 kDa class I small heat shock protein (HSP17.6C-CI) (AA 1-156)
261085_at	AT1G17480	3.74739	7e-05	IQD7 (IQ-domain 7); calmodulin binding
263310_s_at	AT2G10350;AT4G03970	3.74739	3e-06	[AT2G10350, transposable element gene];[AT4G03970, transposable element gene]
254629_at	AT4G18425	3.73985	0.001803	unknown protein
246025_at	AT5G21150	3.72683	0.000946	PAZ domain-containing protein / piwi domain-containing protein
254819_at	AT4G12500	3.72574	0.001796	protease inhibitor/seed storage/lipid transfer protein (LTP) family protein
248330_at	AT5G52810	3.70708	0.002338	ornithine cyclodeaminase/mu-crystallin family protein
250983_at	AT5G02780	3.70487	0.001085	In2-1 protein, putative
246344_at	AT3G56730	3.70487	0.000214	unknown protein
256781_at	AT3G13650	3.70377	0.001939	disease resistance response
267572_at	AT2G30660	3.70266	0.005992	3-hydroxyisobutyryl-coenzyme A hydrolase, putative / CoA-thioester hydrolase, putative
266078_at	AT2G40670	3.70266	0.001768	ARR16 (ARABIDOPSIS RESPONSE REGULATOR 16); transcription regulator/ two-component response regulator
246274_at	AT4G36620	3.69711	0.006573	zinc finger (GATA type) family protein
248895_at	AT5G46330	3.69042	0.01117	FLS2 (FLAGELLIN-SENSITIVE 2); ATP binding / kinase/ protein binding / protein serine/threonine kinase/ transmembrane receptor protein serine/threonine kinase
260068_at	AT1G73805	3.68818	0.005463	calmodulin binding
262482_at	AT1G17020	3.68145	0.003532	SRG1 (SENESCENCE-RELATED GENE 1); oxidoreductase, acting on diphenols and related substances as donors, oxygen as acceptor / oxidoreductase, acting on paired donors, with incorporation or reduction of molecular oxygen, 2-oxoglutarate as one donor, and inc
264832_at	AT1G03660	3.66789	0.002035	FUNCTIONS IN: molecular_function unknown; INVOLVED IN: biological_process unknown; LOCATED IN: cellular_component unknown; EXPRESSED IN: 15 plant structures; EXPRESSED DURING: 4 anthesis, F mature embryo stage, C globular stage, petal differentiation and expansion stage, E expanded cotyledon stage; BEST Arabidopsis thaliana protein match is: ankyrin repeat family protein (TAIR:AT1G03670.1); Has 5…
256319_at	AT1G35910	3.66676	0.000478	trehalose-6-phosphate phosphatase, putative
264200_at	AT1G22650	3.66448	0.002773	beta-fructofuranosidase, putative / invertase, putative / saccharase, putative / beta-fructosidase, putative
265188_at	AT1G23800	3.65191	0.007347	ALDH2B7; 3-chloroallyl aldehyde dehydrogenase/ aldehyde dehydrogenase (NAD)
264640_at	AT1G65680	3.64962	7.1e-05	ATEXPB2 (ARABIDOPSIS THALIANA EXPANSIN B2)
261653_at	AT1G01900	3.64155	0.005091	SBTI1.1; serine-type endopeptidase
254416_at	AT4G21380	3.6311	0.000606	ARK3 (A. THALIANA RECEPTOR KINASE 3); kinase/ transmembrane receptor protein serine/threonine kinase
247655_at	AT5G59820	3.62877	0.002915	RHL41 (RESPONSIVE TO HIGH LIGHT 41); nucleic acid binding / transcription factor/ zinc ion binding
259089_at	AT3G04960	3.62644	0.006262	FUNCTIONS IN: molecular_function unknown; INVOLVED IN: biological_process unknown; LOCATED IN: cellular_component unknown; EXPRESSED IN: 11 plant structures; EXPRESSED DURING: 6 growth stages; CONTAINS InterPro DOMAIN/s: Molecular chaperone, heat shock protein, Hsp40, DnaJ (InterPro:IPR015609); BEST Arabidopsis thaliana protein match is: unknown protein (TAIR:AT4G27980.1); Has 26349 Blast hits to…
253733_at	AT4G29170	3.62644	0.005285	ATMND1
262177_at	AT1G74710	3.61589	0.004288	isochorismate synthase 1 (ICS1) / isochorismate mutase
261021_at	AT1G26380	3.59694	0.007774	FAD-binding domain-containing protein
254271_at	AT4G23150	3.59335	0.010011	protein kinase family protein
245840_at	AT1G58420	3.59216	0.009539	FUNCTIONS IN: molecular_function unknown; INVOLVED IN: biological_process unknown; LOCATED IN: cellular_component unknown; EXPRESSED IN: 21 plant structures; EXPRESSED DURING: 11 growth stages; CONTAINS InterPro DOMAIN/s: Uncharacterised conserved protein UCP031279 (InterPro:IPR016972); BEST Arabidopsis thaliana protein match is: unknown protein (TAIR:AT1G10140.1); Has 28 Blast hits to 28 protein…
260225_at	AT1G74590	3.59096	0.00374	GSTU10 (GLUTATHIONE S-TRANSFERASE TAU 10); glutathione transferase
266821_at	AT2G44840	3.57168	0.00583	ERF13 (ETHYLENE-RESPONSIVE ELEMENT BINDING FACTOR 13); DNA binding / transcription factor
254565_at	AT4G19130	3.56803	4.3e-05	DNA binding / nucleic acid binding / zinc ion binding
265654_s_at	AT1G52850;AT2G13870	3.56803	0.002207	[AT1G52850, transposable element gene];[AT2G13870, transposable element gene]
257690_at	AT3G12830	3.56803	0.000999	auxin-responsive family protein
261234_x_at	AT2G04970;AT1G32830;AT3G47270;AT2G14140	3.56682	0.002671	[AT2G04970, transposable element gene];[AT1G32830, transposable element gene];[AT3G47270, transposable element gene];[AT2G14140, transposable element gene]
249147_at	AT5G43330	3.5656	0.002322	malate dehydrogenase, cytosolic, putative
250676_at	AT5G06320	3.55459	0.011943	NHL3
265466_at	no_match	3.54844	0.000293	no_match
246293_at	AT3G56710	3.54844	0.003368	SIB1 (SIGMA FACTOR BINDING PROTEIN 1); binding / protein binding
249417_at	AT5G39670	3.53978	0.004299	calcium-binding EF hand family protein
261443_at	AT1G28480	3.53605	0.000956	GRX480; electron carrier/ protein disulfide oxidoreductase
258769_at	AT3G10870	3.52982	0.000578	MES17 (METHYL ESTERASE 17); hydrolase/ hydrolase, acting on ester bonds / methyl indole-3-acetate esterase
263317_s_at	AT2G24740;AT1G17770	3.52231	0.003028	[AT2G24740, SDG21 (SET DOMAIN GROUP 21); histone methyltransferase];[AT1G17770, SUVH7 (SU(VAR)3-9 HOMOLOG 7); DNA binding / histone-lysine N-methyltransferase/ zinc ion binding]
246368_at	AT1G51890	3.51979	0.011252	leucine-rich repeat protein kinase, putative
253238_at	AT4G34480	3.51475	0.000515	catalytic/ cation binding / hydrolase, hydrolyzing O-glycosyl compounds
257669_at	no_match	3.50716	0.003413	no_match
267576_at	AT2G30640	3.50589	0.000808	transposable element gene
266294_at	AT2G29500	3.49953	0.00076	17.6 kDa class I small heat shock protein (HSP17.6B-CI)
250501_at	AT5G09640	3.48671	0.00304	SCPL19; serine-type carboxypeptidase/ sinapoyltransferase
261511_at	AT1G71770	3.48414	0.006852	PAB5 (POLY(A)-BINDING PROTEIN 5); RNA binding / poly(A) binding / translation initiation factor
252478_at	AT3G46540	3.47379	0.00037	epsin N-terminal homology (ENTH) domain-containing protein / clathrin assembly protein-related
264434_at	AT1G10340	3.46858	0.007923	ankyrin repeat family protein
247515_at	AT5G61740	3.45681	0.003114	ATATH14; ATPase, coupled to transmembrane movement of substances / transporter
252168_at	AT3G50440	3.4489	0.00606	MES10 (METHYL ESTERASE 10); hydrolase/ hydrolase, acting on ester bonds / methyl jasmonate esterase
263280_x_at	AT1G32830;AT2G14140	3.44493	0.003901	[AT1G32830, transposable element gene];[AT2G14140, transposable element gene]
259320_at	AT3G01080	3.43563	0.006493	WRKY58; transcription factor
246241_at	AT4G37050	3.43429	0.005536	PLP4 (PATATIN-LIKE PROTEIN 4); nutrient reservoir
257844_at	AT3G28480	3.42223	0.005958	oxidoreductase, 2OG-Fe(II) oxygenase family protein
253987_at	AT4G26270	3.41819	0.003618	PFK3 (PHOSPHOFRUCTOKINASE 3); 6-phosphofructokinase
264282_at	AT1G61840	3.41819	4e-06	DC1 domain-containing protein
259721_at	AT1G60890	3.39232	0.001411	phosphatidylinositol-4-phosphate 5-kinase family protein
257061_at	AT3G18250	3.38957	0.010377	unknown protein
253813_at	AT4G28150	3.36737	0.008155	unknown protein
266782_at	AT2G29120	3.36177	0.000728	ATGLR2.7; intracellular ligand-gated ion channel
256425_at	AT1G33560	3.34625	0.010566	ADR1 (ACTIVATED DISEASE RESISTANCE 1); kinase
254130_at	AT4G24540	3.33628	0.008133	AGL24 (AGAMOUS-LIKE 24); protein binding / protein heterodimerization/ protein homodimerization/ sequence-specific DNA binding / transcription factor
265912_at	AT2G25570	3.33342	0.001639	binding
263768_x_at	AT2G06330	3.32625	0.010749	transposable element gene
266071_at	AT2G18680;AT2G18670	3.32048	0.00975	[AT2G18680, unknown protein];[AT2G18670, zinc finger (C3HC4-type RING finger) family protein]
261211_at	AT1G12780	3.31179	0.000334	UGE1 (UDP-D-glucose/UDP-D-galactose 4-epimerase 1); UDP-glucose 4-epimerase/ protein dimerization
254648_at	AT4G18550	3.31034	0.004636	lipase class 3 family protein
256771_at	AT3G13710;AT3G13700	3.30743	0.008933	[AT3G13710, PRA1.F4 (PRENYLATED RAB ACCEPTOR 1.F4)];[AT3G13700, RNA-binding protein, putative]
259607_at	AT1G27940	3.30597	0.000356	PGP13 (P-GLYCOPROTEIN 13); ATPase, coupled to transmembrane movement of substances
258618_at	AT3G02885	3.30012	0.002377	GASA5 (GAST1 PROTEIN HOMOLOG 5)
263511_at	AT2G12420	3.29572	0.004155	transposable element gene
247436_at	AT5G62530	3.29131	0.000678	ALDH12A1; 1-pyrroline-5-carboxylate dehydrogenase/ 3-chloroallyl aldehyde dehydrogenase
256871_at	AT3G26480	3.28244	0.004786	transducin family protein / WD-40 repeat family protein
257509_at	AT1G63190	3.28096	0.002623	FUNCTIONS IN: molecular_function unknown; LOCATED IN: cellular_component unknown; EXPRESSED IN: sperm cell, male gametophyte, flower, pollen tube; EXPRESSED DURING: L mature pollen stage, M germinated pollen stage, 4 anthesis; CONTAINS InterPro DOMAIN/s: Cystatin-related, plant (InterPro:IPR006525); BEST Arabidopsis thaliana protein match is: unknown protein (TAIR:AT1G63200.1); Has 24 Blast hits …
267496_at	AT2G30550	3.27798	0.003465	lipase class 3 family protein
249626_at	AT5G37540	3.27501	0.000368	aspartyl protease family protein
257623_at	AT3G26210	3.27352	0.00771	CYP71B23; electron carrier/ heme binding / iron ion binding / monooxygenase/ oxygen binding
250476_at	AT5G10140	3.26903	0.0005	FLC (FLOWERING LOCUS C); specific transcriptional repressor/ transcription factor
257697_at	AT3G12700	3.26754	0.00217	aspartyl protease family protein
265937_at	AT2G19610	3.26604	0.005203	zinc finger (C3HC4-type RING finger) family protein
253997_at	AT4G26090	3.26604	0.000642	RPS2 (RESISTANT TO P. SYRINGAE 2); protein binding
256927_at	AT3G22550	3.26153	0.001972	senescence-associated protein-related
257809_at	AT3G27060	3.25248	0.004803	TSO2 (TSO meaning 'ugly' in Chinese); oxidoreductase/ ribonucleoside-diphosphate reductase/ transition metal ion binding
258503_at	AT3G02500	3.24945	0.000109	unknown protein
266503_at	AT2G47780	3.24489	0.003899	rubber elongation factor (REF) protein-related
263536_at	AT2G25000	3.23879	0.01078	WRKY60; transcription factor
261242_at	AT1G32960	3.23726	0.004369	SBT3.3; identical protein binding / serine-type endopeptidase
253268_s_at	AT4G34131;AT4G34135	3.23573	0.001044	[AT4G34131, UGT73B3 (UDP-glucosyl transferase 73B3); UDP-glycosyltransferase/ abscisic acid glucosyltransferase/ quercetin 3-O-glucosyltransferase/ transferase, transferring hexosyl groups];[AT4G34135, UGT73B2 (UDP-GLUCOSYLTRANSFERASE 73B2); UDP-glucosyltransferase/ UDP-glycosyltransferase/ flavonol 3-O-glucosyltransferase/ quercetin 7-O-glucosyltransferase]
250344_at	AT5G11930	3.21412	0.006575	glutaredoxin family protein
255172_x_at	AT4G08000	3.21257	0.004759	transposable element gene
256832_at	AT3G22880	3.21257	0.000816	DMC1 (DISRUPTION OF MEIOTIC CONTROL 1); ATP binding / DNA binding / DNA-dependent ATPase/ damaged DNA binding / nucleoside-triphosphatase/ nucleotide binding / protein binding
265465_at	AT2G37070	3.21101	0.001348	unknown protein
258473_s_at	AT3G02610;AT3G02620	3.20633	0.00693	[AT3G02610, acyl-[acyl-carrier-protein] desaturase/ oxidoreductase/ transition metal ion binding];[AT3G02620, acyl-(acyl-carrier-protein) desaturase, putative / stearoyl-ACP desaturase, putative]
264951_at	AT1G76970	3.19377	0.000345	VHS domain-containing protein / GAT domain-containing protein
261125_at	AT1G04990	3.19219	0.000235	zinc finger (CCCH-type) family protein
266176_at	AT2G02250	3.18903	0.002458	AtPP2-B2 (Phloem protein 2-B2); carbohydrate binding
267140_at	AT2G38250	3.18428	0.00608	DNA-binding protein-related
266163_at	AT2G28130	3.18269	0.00221	unknown protein
247317_at	AT5G64060	3.18269	0.000387	anac103 (Arabidopsis NAC domain containing protein 103); transcription factor
259913_at	AT1G72660	3.17632	0.010922	developmentally regulated GTP-binding protein, putative
260517_at	AT1G51420	3.17313	0.002017	SPP1 (SUCROSE-PHOSPHATASE 1); catalytic/ magnesium ion binding / phosphatase/ sucrose-phosphatase
259409_at	AT1G13330	3.16832	0.000618	FUNCTIONS IN: molecular_function unknown; INVOLVED IN: biological_process unknown; LOCATED IN: cellular_component unknown; EXPRESSED IN: 11 plant structures; EXPRESSED DURING: 6 growth stages; CONTAINS InterPro DOMAIN/s: Tat binding protein 1-interacting (InterPro:IPR010776); Has 2425 Blast hits to 2142 proteins in 283 species: Archae - 50; Bacteria - 240; Metazoa - 929; Fungi - 179; Plants - 47;…
255883_at	AT1G20270	3.16832	0.011336	oxidoreductase, 2OG-Fe(II) oxygenase family protein
262981_at	AT1G75590	3.16672	0.000781	auxin-responsive family protein
265728_at	AT2G31990	3.1635	0.0053	exostosin family protein
262528_at	AT1G17260	3.1635	0.006792	AHA10 (Autoinhibited H(+)-ATPase isoform 10); ATPase/ ATPase, coupled to transmembrane movement of ions, phosphorylative mechanism / cation-transporting ATPase
247224_at	AT5G65080	3.15543	0.001944	MAF5 (MADS AFFECTING FLOWERING 5); transcription factor
262347_at	AT1G64110	3.15381	0.00765	AAA-type ATPase family protein
246790_at	AT5G27610	3.15381	0.002058	DNA binding / transcription factor
251127_at	AT1G30784;AT5G01080	3.15056	0.003731	[AT1G30784, Pseudogene of AT5G01080; beta-galactosidase];[AT5G01080, beta-galactosidase]
266113_x_at	no_match	3.15056	0.005169	no_match
254120_at	AT4G24570	3.14731	0.005145	mitochondrial substrate carrier family protein
258209_at	AT3G14060	3.14568	0.000226	unknown protein
253173_at	AT4G35110	3.14405	0.002869	FUNCTIONS IN: molecular_function unknown; INVOLVED IN: biological_process unknown; LOCATED IN: cellular_component unknown; EXPRESSED IN: 15 plant structures; EXPRESSED DURING: 10 growth stages; CONTAINS InterPro DOMAIN/s: Phospholipase-like, arabidopsis (InterPro:IPR007942); BEST Arabidopsis thaliana protein match is: unknown protein (TAIR:AT2G16900.1); Has 495 Blast hits to 408 proteins in 102 s…
254055_at	AT4G25330	3.14241	0.002036	unknown protein
248971_at	AT5G45000	3.1375	0.008378	transmembrane receptor
246943_at	AT5G25440	3.13586	0.003712	protein kinase family protein
260223_at	AT1G74390	3.12598	0.000641	exonuclease family protein
259224_at	AT3G07800	3.12598	9.4e-05	thymidine kinase, putative
252703_at	AT3G43740	3.11603	0.000894	leucine-rich repeat family protein
249772_at	AT5G24130	3.11103	0.004375	unknown protein
260145_at	AT1G52920	3.11103	0.001657	GPCR (G PROTEIN COUPLED RECEPTOR); abscisic acid binding / catalytic
263734_at	AT1G60030	3.10936	0.007468	xanthine/uracil permease family protein
252340_at	AT3G48920	3.10769	0.002732	AtMYB45 (myb domain protein 45); DNA binding / transcription factor
263467_at	AT2G31730	3.10769	7.1e-05	ethylene-responsive protein, putative
255893_at	AT1G17960	3.10601	0.000289	threonyl-tRNA synthetase, putative / threonine--tRNA ligase, putative
254889_at	AT4G11650	3.10601	0.000196	ATOSM34 (osmotin 34)
258110_at	AT3G14610	3.10601	4e-06	CYP72A7; electron carrier/ heme binding / iron ion binding / monooxygenase/ oxygen binding
260211_at	AT1G74440	3.10434	0.001965	unknown protein
266879_at	AT2G44590	3.10098	0.004864	ADL1D (ARABIDOPSIS DYNAMIN-RELATED PROTEIN 1D); GTP binding / GTPase
257480_at	AT1G15640	3.09761	0.00204	unknown protein
266620_at	AT2G35450	3.09592	0.000328	catalytic/ hydrolase
267604_at	AT2G32930	3.09592	0.001195	ZFN2 (ZINC FINGER NUCLEASE 2); DNA binding / nuclease/ nucleic acid binding
265354_at	AT2G16700	3.08746	0.002353	ADF5 (ACTIN DEPOLYMERIZING FACTOR 5); actin binding
248949_at	AT5G45570	3.08576	0.000181	Ulp1 protease family protein
255844_at	AT2G33580	3.07553	0.011634	protein kinase family protein / peptidoglycan-binding LysM domain-containing protein
246639_x_at	AT5G34895	3.07039	0.001835	transposable element gene
249983_at	AT5G18470	3.06867	0.002628	curculin-like (mannose-binding) lectin family protein
250369_at	AT5G11300	3.05658	0.000607	CYC3B (MITOTIC-LIKE CYCLIN 3B FROM ARABIDOPSIS); cyclin-dependent protein kinase regulator
260335_at	AT1G74000	3.05311	0.012655	SS3 (STRICTOSIDINE SYNTHASE 3); strictosidine synthase
247487_at	AT5G62150	3.04789	0.001179	peptidoglycan-binding LysM domain-containing protein
250258_at	AT5G13790	3.03562	2.7e-05	AGL15 (AGAMOUS-LIKE 15); DNA binding / transcription factor
259197_at	AT3G03670	3.03562	0.007083	peroxidase, putative
263765_at	AT2G21540	3.03386	1.5e-05	SFH3 (SEC14-LIKE 3); phosphatidylinositol transporter
259560_at	AT1G21270	3.0321	0.008727	WAK2; ATP binding / calcium ion binding / protein kinase/ protein serine/threonine kinase
264969_at	AT1G67320	3.02857	0.001402	DNA primase, large subunit family
246353_s_at	AT4G08010;AT1G39190;AT3G42721	3.0268	0.000453	[AT4G08010, transposable element gene];[AT1G39190, transposable element gene];[AT3G42721, transposable element gene]
248022_at	AT5G56510	3.02503	4e-06	APUM12 (ARABIDOPSIS PUMILIO 12); RNA binding / binding
258516_at	AT3G06490	3.02148	0.002114	MYB108 (myb domain protein 108); DNA binding / transcription factor
248829_at	AT5G47130	3.0197	0.00072	Bax inhibitor-1 family / BI-1 family
257943_at	AT3G21840	3.01614	0.004526	ASK7 (ARABIDOPSIS SKP1-LIKE 7); protein binding / ubiquitin-protein ligase
261161_at	AT1G34420	3.01614	0.002662	leucine-rich repeat family protein / protein kinase family protein
258530_at	AT3G06840	3.01078	0.001199	unknown protein
262118_at	AT1G02850	3.0054	0.002636	BGLU11 (BETA GLUCOSIDASE 11); catalytic/ cation binding / hydrolase, hydrolyzing O-glycosyl compounds
256252_at	AT3G11340	3.0018	0.006994	UDP-glucoronosyl/UDP-glucosyl transferase family protein
246898_at	AT5G25580	2.99639	3.4e-05	FUNCTIONS IN: molecular_function unknown; INVOLVED IN: biological_process unknown; LOCATED IN: cellular_component unknown; EXPRESSED IN: 17 plant structures; EXPRESSED DURING: 8 growth stages; BEST Arabidopsis thaliana protein match is: aminoacyl-tRNA synthetase family (TAIR:AT1G18950.1); Has 138 Blast hits to 138 proteins in 63 species: Archae - 0; Bacteria - 4; Metazoa - 48; Fungi - 29; Plants …
250616_at	AT5G07280	2.99095	0.006437	EMS1 (EXCESS MICROSPOROCYTES1); kinase/ transmembrane receptor protein kinase
258042_at	AT3G21310	2.98732	1.6e-05	unknown protein
264866_at	AT1G24140	2.98185	0.002611	matrixin family protein
256366_at	AT1G66880	2.98185	0.00536	serine/threonine protein kinase family protein
245439_at	AT4G16670	2.98003	0.006133	phosphoinositide binding
253915_at	AT4G27280	2.9782	0.012833	calcium-binding EF hand family protein
254274_at	AT4G22770	2.97636	0.006304	DNA-binding family protein
259507_at	AT1G43910	2.97636	0.007159	AAA-type ATPase family protein
247727_at	AT5G59490	2.97269	0.002538	haloacid dehalogenase-like hydrolase family protein
245330_at	AT4G14930	2.97269	0.003205	acid phosphatase survival protein SurE, putative
260015_at	AT1G67980	2.96532	0.001559	CCoAMT; caffeoyl-CoA O-methyltransferase
263478_at	AT2G31880	2.95791	0.002146	leucine-rich repeat transmembrane protein kinase, putative
263214_at	AT1G30660	2.9542	0.000621	nucleic acid binding
252770_at	AT3G42860	2.95047	0.001486	zinc knuckle (CCHC-type) family protein
250287_at	AT5G13330	2.95047	0.011645	Rap2.6L (related to AP2 6L); DNA binding / transcription factor
263357_s_at	AT3G32901;AT1G32820;AT2G15210;AT2G07250;AT3G47280;AT5G34890;AT4G03980;AT3G30455;AT2G04950;AT2G15150;AT2G14150;AT2G06450	2.94486	0.006906	[AT3G32901, transposable element gene];[AT1G32820, transposable element gene];[AT2G15210, transposable element gene];[AT2G07250, transposable element gene];[AT3G47280, transposable element gene];[AT5G34890, transposable element gene];[AT4G03980, transposable element gene];[AT3G30455, transposable element gene];[AT2G04950, transposable element gene];[AT2G15150, transposable element gene];[AT2G1415…
247666_at	AT5G60140	2.94486	0.002788	transcriptional factor B3 family protein
262875_at	AT1G64970	2.94486	0.00169	G-TMT (GAMMA-TOCOPHEROL METHYLTRANSFERASE); tocopherol O-methyltransferase
253149_at	AT4G35650	2.94298	0.00961	isocitrate dehydrogenase, putative / NAD+ isocitrate dehydrogenase, putative
246132_at	AT5G20850	2.94111	4e-06	ATRAD51; ATP binding / DNA binding / DNA-dependent ATPase/ damaged DNA binding / nucleoside-triphosphatase/ nucleotide binding / protein binding / sequence-specific DNA binding
262887_at	AT1G14780	2.94111	0.002576	FUNCTIONS IN: molecular_function unknown; INVOLVED IN: biological_process unknown; LOCATED IN: cellular_component unknown; EXPRESSED IN: 13 plant structures; EXPRESSED DURING: 6 growth stages; CONTAINS InterPro DOMAIN/s: Membrane attack complex component/perforin/complement C9 (InterPro:IPR001862); BEST Arabidopsis thaliana protein match is: unknown protein (TAIR:AT4G24290.2); Has 119 Blast hits …
259937_s_at	AT3G13080;AT1G71330	2.93546	6.9e-05	[AT3G13080, ATMRP3; ATPase, coupled to transmembrane movement of substances / chlorophyll catabolite transporter/ glutathione S-conjugate-exporting ATPase];[AT1G71330, ATNAP5; ATPase, coupled to transmembrane movement of substances / transporter]
254832_at	AT4G12490	2.92979	0.00167	protease inhibitor/seed storage/lipid transfer protein (LTP) family protein
257540_at	AT3G21520	2.9222	5.6e-05	unknown protein
264410_s_at	AT1G43205;AT4G07523;AT1G43230;AT5G27180	2.91648	0.001499	[AT1G43205, transposable element gene];[AT4G07523, transposable element gene];[AT1G43230, transposable element gene];[AT5G27180, transposable element gene]
251964_at	AT3G53370	2.91456	0.001122	DNA-binding S1FA family protein
250292_at	AT5G13220	2.91456	0.008891	JAZ10 (JASMONATE-ZIM-DOMAIN PROTEIN 10)
257111_x_at	AT3G30450	2.91265	0.000446	transposable element gene
249275_at	AT5G41870	2.90497	8.7e-05	glycoside hydrolase family 28 protein / polygalacturonase (pectinase) family protein
256829_at	AT3G22850	2.89724	0.002147	unknown protein
246600_at	AT5G14930	2.8953	0.000978	SAG101 (SENESCENCE-ASSOCIATED GENE 101); carboxylesterase/ triacylglycerol lipase
255543_at	AT4G01870	2.89142	0.003228	tolB protein-related
260754_at	AT1G49000	2.89142	1e-06	unknown protein
252179_at	AT3G50760	2.89142	0.007223	GATL2 (Galacturonosyltransferase-like 2); polygalacturonate 4-alpha-galacturonosyltransferase/ transferase, transferring glycosyl groups / transferase, transferring hexosyl groups
254333_at	AT4G22753	2.88947	0.002777	SMO1-3 (STEROL 4-ALPHA METHYL OXIDASE 1-3); 4,4-dimethyl-9beta,19-cyclopropylsterol-4alpha-methyl oxidase/ catalytic
261071_at	AT1G07380	2.88753	0.000381	ceramidase family protein
247039_at	AT5G67270	2.88557	0.004349	ATEB1C (microtubule end binding protein 1); microtubule binding
252330_at	AT3G48770	2.88362	0.001707	ATP binding / DNA binding
261846_at	AT1G11540	2.87774	0.000266	unknown protein
254946_at	AT4G10950	2.87578	0.002145	GDSL-motif lipase/hydrolase family protein
257271_at	AT3G28007	2.87381	0.001107	nodulin MtN3 family protein
247851_at	AT5G58070	2.87381	0.001581	TIL (TEMPERATURE-INDUCED LIPOCALIN); binding / transporter
246385_at	AT1G77390	2.87381	0.001412	CYCA1;2 (CYCLIN A1;2); cyclin-dependent protein kinase regulator
252962_at	AT4G38780	2.87184	2.6e-05	splicing factor, putative
248481_at	AT5G50930	2.87184	0.000981	DNA binding
253643_at	AT4G29780	2.86987	0.009698	unknown protein
256981_at	AT3G13380	2.86592	0.001883	BRL3 (BRI1-LIKE 3); ATP binding / protein binding / protein kinase/ protein serine/threonine kinase
264815_at	AT1G03620	2.86592	0.001527	phagocytosis and cell motility protein ELMO1-related
267565_at	AT2G30750	2.85997	0.009773	CYP71A12 (cytochrome P450, family 71, subfamily A, polypeptide 12); electron carrier/ heme binding / iron ion binding / monooxygenase/ oxygen binding
256854_at	AT3G15180	2.85599	3.2e-05	proteasome-related
262942_at	AT1G79450	2.85599	0.001968	ALIS5 (ALA-Interacting Subunit 5)
266150_s_at	AT2G12290;AT4G19700	2.848	0.004236	[AT2G12290, FUNCTIONS IN: molecular_function unknown; INVOLVED IN: biological_process unknown; LOCATED IN: cellular_component unknown; BEST Arabidopsis thaliana protein match is: RING; protein binding / zinc ion binding (TAIR:AT4G19700.1); Has 39 Blast hits to 39 proteins in 8 species: Archae - 0; Bacteria - 0; Metazoa - 0; Fungi - 0; Plants - 39; Viruses - 0; Other Eukaryotes - 0 (source: NCBI B…
260890_at	AT1G29090	2.84599	0.007099	peptidase C1A papain family protein
255613_at	AT4G01270	2.84599	0.003129	zinc finger (C3HC4-type RING finger) family protein
253099_s_at	AT4G37530;AT4G37520	2.84398	0.007357	[AT4G37530, peroxidase, putative];[AT4G37520, peroxidase 50 (PER50) (P50) (PRXR2)]
248006_at	AT5G56250	2.84197	0.002825	HAP8 (HAPLESS 8)
253364_at	AT4G33160	2.83794	2e-06	ubiquitin-protein ligase
248494_at	AT5G50770	2.83592	0.003595	AtHSD6 (hydroxysteroid dehydrogenase 6); binding / catalytic/ oxidoreductase
263346_at	AT2G05660	2.83188	0.001458	transposable element gene
266992_at	AT2G39200	2.82985	0.000501	MLO12 (MILDEW RESISTANCE LOCUS O 12); calmodulin binding
254453_at	AT4G21120	2.82579	0.005305	AAT1 (AMINO ACID TRANSPORTER 1); L-glutamate transmembrane transporter/ L-lysine transmembrane transporter/ arginine transmembrane transporter/ cationic amino acid transmembrane transporter
254543_at	AT4G19810	2.81967	0.000945	glycosyl hydrolase family 18 protein
251096_at	AT5G01550	2.81352	0.004392	LECRKA4.2 (LECTIN RECEPTOR KINASE A4.1); ATP binding / kinase/ protein kinase/ protein serine/threonine kinase/ sugar binding
263228_at	AT1G30700	2.81147	1.4e-05	FAD-binding domain-containing protein
266488_at	AT2G47670	2.80941	0.011977	invertase/pectin methylesterase inhibitor family protein
258498_at	AT3G02480	2.80735	0.007381	ABA-responsive protein-related
247050_at	AT5G66660	2.78869	0.002488	unknown protein
259410_at	AT1G13340	2.7866	0.012948	unknown protein
258813_at	AT3G04060	2.7866	0.003888	anac046 (Arabidopsis NAC domain containing protein 46); transcription factor
257840_at	AT3G25250	2.7866	0.006451	AGC2-1 (OXIDATIVE SIGNAL-INDUCIBLE1); kinase
258332_at	AT3G16180	2.7845	0.000526	proton-dependent oligopeptide transport (POT) family protein
249784_at	AT5G24280	2.78241	0.00315	EXPRESSED IN: 17 plant structures; EXPRESSED DURING: 6 growth stages; BEST Arabidopsis thaliana protein match is: DMS3 (DEFECTIVE IN MERISTEM SILENCING 3) (TAIR:AT3G49250.1); Has 61 Blast hits to 57 proteins in 12 species: Archae - 0; Bacteria - 2; Metazoa - 8; Fungi - 2; Plants - 46; Viruses - 0; Other Eukaryotes - 3 (source: NCBI BLink).
263419_at	AT2G17220	2.78031	0.010347	protein kinase, putative
247111_at	AT5G65880	2.77821	0.000944	unknown protein
246889_at	AT5G25470	2.7761	0.00168	DNA binding
251336_at	AT3G61190	2.77189	0.004666	BAP1 (BON ASSOCIATION PROTEIN 1); phospholipid binding / protein binding
267246_at	AT2G30250	2.76977	0.0003	WRKY25; transcription factor
252695_s_at	AT1G36040;AT3G43640	2.76765	0.000124	[AT1G36040, transposable element gene];[AT3G43640, transposable element gene]
264056_at	AT2G28510	2.75916	0.003041	Dof-type zinc finger domain-containing protein
250212_at	AT5G13960	2.75916	0.00048	SUVH4 (SU(VAR)3-9 HOMOLOG 4); double-stranded methylated DNA binding / histone methyltransferase(H3-K9 specific) / methyl-CpG binding / methyl-CpNpG binding / methyl-CpNpN binding
247081_at	AT5G66130	2.75702	4.1e-05	ATRAD17 (ARABIDOPSIS THALIANA RADIATION SENSITIVE)
258525_at	AT3G06810	2.75489	0.001217	IBR3 (IBA-RESPONSE 3); acyl-CoA dehydrogenase/ oxidoreductase
249326_at	AT5G40840	2.75061	0.001036	SYN2
245854_at	AT5G13490	2.75061	0.00242	AAC2 (ADP/ATP carrier 2); ATP:ADP antiporter/ binding
245086_at	AT2G39820	2.74631	0.001475	eukaryotic translation initiation factor 6, putative / eIF-6, putative
250302_at	AT5G11920	2.73985	0.000487	AtcwINV6 (6-&1-fructan exohydrolase); hydrolase, hydrolyzing O-glycosyl compounds / inulinase/ levanase
262507_at	AT1G11330	2.73769	0.006308	S-locus lectin protein kinase family protein
245328_at	AT4G14465	2.72683	0.009646	DNA-binding protein-related
256714_at	AT2G34080	2.72683	0.008066	cysteine proteinase, putative
258064_at	AT3G14680	2.71809	0.000487	CYP72A14; electron carrier/ heme binding / iron ion binding / monooxygenase/ oxygen binding
257130_at	AT3G20210	2.7137	0.004875	DELTA-VPE; cysteine-type endopeptidase
262902_x_at	AT1G59930	2.70266	0.002085	unknown protein
261526_at	AT1G14370	2.70044	0.000558	APK2A (PROTEIN KINASE 2A); ATP binding / kinase/ protein kinase/ protein serine/threonine kinase
253993_at	AT4G26070	2.69822	0.001508	MEK1 (MAP KINASE/ ERK KINASE 1); MAP kinase kinase/ kinase/ protein binding
257158_at	AT3G24360	2.69599	0.009299	enoyl-CoA hydratase/isomerase family protein
261436_at	AT1G07870	2.6893	0.000585	protein kinase family protein
247080_at	AT5G66140	2.67129	0.001252	PAD2 (PROTEASOME ALPHA SUBUNIT D 2); endopeptidase/ peptidase/ threonine-type endopeptidase
265743_s_at	AT1G39110;AT2G06720;AT3G42720	2.66448	0.007591	[AT1G39110, transposable element gene];[AT2G06720, transposable element gene];[AT3G42720, transposable element gene]
262008_s_at	AT5G45085;AT3G30680;AT4G03900;AT1G40123;AT1G35590	2.65992	0.000811	[AT5G45085, transposable element gene];[AT3G30680, transposable element gene];[AT4G03900, transposable element gene];[AT1G40123, transposable element gene];[AT1G35590, transposable element gene]
262601_at	AT1G15310	2.65992	0.000293	ATHSRP54A (ARABIDOPSIS THALIANA SIGNAL RECOGNITION PARTICLE 54 KDA SUBUNIT); 7S RNA binding / GTP binding / mRNA binding / nucleoside-triphosphatase/ nucleotide binding
254574_at	AT4G19430	2.65764	0.006367	unknown protein
267178_at	AT2G37750	2.65535	0.008929	unknown protein
257522_at	AT3G08990	2.65306	0.002466	yippee family protein
263120_at	AT1G78490	2.64386	0.001747	CYP708A3; electron carrier/ heme binding / iron ion binding / monooxygenase/ oxygen binding
250597_at	AT5G07680	2.63691	0.006806	ANAC080 (ARABIDOPSIS NAC DOMAIN CONTAINING PROTEIN 80); transcription factor
255547_at	AT4G01920	2.63227	4.1e-05	DC1 domain-containing protein
250994_at	AT5G02490	2.63227	0.005516	heat shock cognate 70 kDa protein 2 (HSC70-2) (HSP70-2)
255430_at	AT4G03320	2.62994	0.001474	tic20-IV (TRANSLOCON AT THE INNER ENVELOPE MEMBRANE OF CHLOROPLASTS 20-IV)
263221_at	AT1G30620	2.62994	0.003989	MUR4 (MURUS 4); UDP-arabinose 4-epimerase/ catalytic
256621_at	AT3G24450	2.62761	0.001868	copper-binding family protein
248419_at	AT5G51550	2.61353	0.002493	EXL3 (EXORDIUM LIKE 3)
267181_at	AT2G37760	2.60881	0.002611	aldo/keto reductase family protein
249127_at	AT5G43500	2.60407	0.000803	ATARP9 (ACTIN-RELATED PROTEIN 9); protein binding
248327_at	AT5G52750	2.59932	0.005273	heavy-metal-associated domain-containing protein
254592_at	AT4G18880	2.59694	0.001011	AT-HSFA4A; DNA binding / transcription factor
252193_at	AT3G50060	2.59216	0.01209	MYB77; DNA binding / transcription factor
247234_at	AT5G64980	2.58976	0.001292	unknown protein
259255_at	AT3G07690	2.58015	1.4e-05	NAD or NADH binding / binding / catalytic/ coenzyme binding / glycerol-3-phosphate dehydrogenase (NAD+)/ oxidoreductase/ oxidoreductase, acting on CH-OH group of donors / oxidoreductase, acting on the CH-OH group of donors, NAD or NADP as acceptor
249112_at	AT5G43780	2.57531	0.006046	APS4; sulfate adenylyltransferase (ATP)
246479_at	AT5G16060	2.57531	0.00094	FUNCTIONS IN: molecular_function unknown; INVOLVED IN: biological_process unknown; LOCATED IN: cellular_component unknown; EXPRESSED IN: 22 plant structures; EXPRESSED DURING: 13 growth stages; CONTAINS InterPro DOMAIN/s: Cytochrome c oxidase biogenesis protein Cmc1-like (InterPro:IPR013892); Has 47 Blast hits to 47 proteins in 24 species: Archae - 0; Bacteria - 0; Metazoa - 4; Fungi - 17; Plants…
247493_at	AT5G61900	2.56803	0.006358	BON1 (BONZAI 1); calcium-dependent phospholipid binding
262408_at	AT1G34750	2.55827	0.000205	protein phosphatase 2C, putative / PP2C, putative
246731_at	AT5G27630	2.55582	0.000139	ACBP5 (ACYL-COA BINDING PROTEIN 5); acyl-CoA binding
249021_at	AT5G44820	2.55582	0.001211	unknown protein
245599_at	AT4G14220	2.55336	0.002679	RHF1A (RING-H2 GROUP F1A); protein binding / ubiquitin-protein ligase/ zinc ion binding
257129_at	AT3G20100	2.55336	0.004988	CYP705A19; electron carrier/ heme binding / iron ion binding / monooxygenase/ oxygen binding
262885_at	AT1G64740	2.54844	1.6e-05	TUA1 (ALPHA-1 TUBULIN); structural constituent of cytoskeleton
251970_at	AT3G53150	2.54844	0.007628	UGT73D1 (UDP-glucosyl transferase 73D1); UDP-glycosyltransferase/ transferase, transferring hexosyl groups
263013_at	AT1G23380	2.54844	0.00216	KNAT6; DNA binding / transcription activator/ transcription factor
250680_at	AT5G06570	2.5435	0.001179	hydrolase
246440_at	AT5G17650	2.53605	0.005182	glycine/proline-rich protein
249197_at	AT5G42380	2.53605	0.009961	CML37 (CALMODULIN LIKE 37); calcium ion binding
249801_at	AT5G23580	2.52607	0.00011	CDPK9 (CALMODULIN-LIKE DOMAIN PROTEIN KINASE 9); ATP binding / calcium ion binding / calmodulin-dependent protein kinase/ kinase/ protein kinase/ protein serine/threonine kinase
257401_at	AT1G23550	2.52356	0.000512	SRO2 (SIMILAR TO RCD ONE 2); NAD+ ADP-ribosyltransferase
262039_at	AT1G80050	2.52356	0.012141	APT2 (ADENINE PHOSPHORIBOSYL TRANSFERASE 2); adenine phosphoribosyltransferase/ phosphate transmembrane transporter
262201_at	AT2G01120	2.52356	6e-05	ORC4 (ORIGIN RECOGNITION COMPLEX SUBUNIT 4); protein binding
252095_at	AT3G51000	2.52356	0.004336	epoxide hydrolase, putative
252889_at	AT4G39380	2.52105	0.005213	FUNCTIONS IN: molecular_function unknown; INVOLVED IN: biological_process unknown; LOCATED IN: cellular_component unknown; EXPRESSED IN: 14 plant structures; EXPRESSED DURING: 7 growth stages; BEST Arabidopsis thaliana protein match is: TKI1 (TSL-kinase interacting protein 1); DNA binding / transcription factor (TAIR:AT2G36960.2); Has 39 Blast hits to 35 proteins in 8 species: Archae - 0; Bacteri…
260179_at	AT1G70690	2.52105	0.005334	HWI1 (HOPW1-1-INDUCED GENE1)
263202_at	AT1G05630	2.51096	0.000355	5PTASE13; inositol or phosphatidylinositol phosphatase
246230_at	AT4G36710	2.50843	0.005242	transcription factor
249259_at	AT5G41660	2.50843	0.000505	unknown protein
248752_at	AT5G47600	2.50843	0.007069	heat shock protein-related
247570_at	AT5G61250	2.50589	0.010496	AtGUS1 (Arabidopsis thaliana glucuronidase 1); beta-glucuronidase
254191_at	AT4G23900	2.50589	0.000469	nucleoside diphosphate kinase 4 (NDK4)
250196_at	AT5G14580	2.50335	0.006495	polyribonucleotide nucleotidyltransferase, putative
259554_at	AT1G21220	2.4957	0.004277	transposable element gene
252921_at	AT4G39030	2.488	0.001242	EDS5 (ENHANCED DISEASE SUSCEPTIBILITY 5); antiporter/ multidrug efflux pump/ transporter
252450_s_at	AT3G47090;AT3G47580	2.48543	0.001549	[AT3G47090, leucine-rich repeat transmembrane protein kinase, putative];[AT3G47580, leucine-rich repeat transmembrane protein kinase, putative]
255760_at	AT1G16780	2.48543	0.000456	vacuolar-type H+-translocating inorganic pyrophosphatase, putative
257295_at	AT3G17420	2.48027	0.003841	GPK1; ATP binding / kinase/ protein kinase/ protein serine/threonine kinase
247103_at	AT5G66610	2.47768	0.000861	DAR7 (DA1-RELATED PROTEIN 7); zinc ion binding
264648_at	AT1G09080	2.47768	0.009047	BIP3; ATP binding
261429_at	AT1G18860	2.47508	0.007741	WRKY61; transcription factor
263986_at	AT2G42790	2.47508	0.000776	CSY3 (citrate synthase 3); citrate (SI)-synthase
249346_at	AT5G40780	2.46989	0.002626	LHT1; amino acid transmembrane transporter
252822_at	AT4G39955	2.46989	0.003909	hydrolase, alpha/beta fold family protein
250138_at	AT5G14610	2.46728	0.000647	ATP binding / ATP-dependent helicase/ helicase/ nucleic acid binding / protein binding
255217_s_at	AT3G30465;AT4G07680;AT2G07395	2.46728	0.000528	[AT3G30465, transposable element gene];[AT4G07680, transposable element gene];[AT2G07395, transposable element gene]
250535_at	AT5G08480	2.46205	0.000178	VQ motif-containing protein
247344_at	AT5G63750	2.45943	0.012414	IBR domain-containing protein
251895_at	AT3G54420	2.45943	0.002486	ATEP3; chitinase
261585_at	AT1G01010	2.45681	0.002828	ANAC001 (Arabidopsis NAC domain containing protein 1); transcription factor
261692_at	AT1G08450	2.45154	0.000467	CRT3 (CALRETICULIN 3); calcium ion binding / unfolded protein binding
251147_at	AT3G63480	2.4489	0.002132	kinesin heavy chain, putative
257291_at	AT3G15590	2.44626	0.00012	DNA-binding protein, putative
247598_at	AT5G60870	2.44626	4.3e-05	regulator of chromosome condensation (RCC1) family protein
256830_at	AT3G22860	2.44626	0.007954	TIF3C2; translation initiation factor
261938_at	AT1G22510	2.44626	0.003278	zinc finger (C3HC4-type RING finger) family protein
266234_at	AT2G02350	2.44095	0.00066	SKIP3 (SKP1 INTERACTING PARTNER 3); carbohydrate binding
265964_at	AT2G37510	2.43829	0.00208	RNA-binding protein, putative
248944_at	AT5G45500	2.43829	9e-05	unknown protein
251063_at	AT5G01850	2.43563	3.6e-05	protein kinase, putative
263707_at	AT1G09300	2.43563	0.005155	metallopeptidase M24 family protein
250913_at	AT5G03770	2.43296	0.00557	3-deoxy-D-manno-octulosonic acid transferase-related
247594_at	AT5G60800	2.43029	0.005583	heavy-metal-associated domain-containing protein
249427_at	AT5G39850	2.42223	0.001795	40S ribosomal protein S9 (RPS9C)
251358_at	AT3G61160	2.41954	0.008876	shaggy-related protein kinase beta / ASK-beta (ASK2)
257779_at	AT3G26940	2.41954	0.007119	CDG1 (CONSTITUTIVE DIFFERENTIAL GROWTH 1); ATP binding / kinase/ protein kinase/ protein serine/threonine kinase
267372_at	AT2G26290	2.41684	0.011195	ARSK1 (root-specific kinase 1); kinase
253027_at	AT4G38150	2.41414	0.003521	pentatricopeptide (PPR) repeat-containing protein
261378_at	AT1G18890	2.41414	0.000185	ATCDPK1 (CALCIUM-DEPENDENT PROTEIN KINASE 1); calmodulin-dependent protein kinase/ kinase/ protein kinase
265926_at	AT2G18600	2.41143	0.008106	RUB1-conjugating enzyme, putative
247640_at	AT5G60610	2.41143	0.005809	F-box family protein
262769_at	AT1G13180	2.40871	0.002612	DIS1 (DISTORTED TRICHOMES 1); ATP binding / actin binding / protein binding / structural constituent of cytoskeleton
253774_at	AT4G28530	2.40599	0.009708	anac074 (Arabidopsis NAC domain containing protein 74); transcription factor
253240_at	AT4G34510	2.40327	0.010911	KCS17 (3-KETOACYL-COA SYNTHASE 17); acyltransferase/ catalytic/ transferase, transferring acyl groups other than amino-acyl groups
251398_at	AT3G60580	2.40327	9.2e-05	zinc finger (C2H2 type) family protein
256529_at	AT1G33260	2.40054	0.001029	protein kinase family protein
258786_at	AT3G11820	2.40054	0.011076	SYP121 (SYNTAXIN OF PLANTS 121); SNAP receptor/ protein anchor
250407_at	AT5G10870	2.3978	0.002209	ATCM2 (chorismate mutase 2); chorismate mutase
260847_s_at	AT1G17290;AT1G72330	2.38681	0.000449	[AT1G17290, AlaAT1 (ALANINE AMINOTRANSFERAS); ATP binding / L-alanine:2-oxoglutarate aminotransferase];[AT1G72330, ALAAT2 (ALANINE AMINOTRANSFERASE 2); ATP binding / L-alanine:2-oxoglutarate aminotransferase]
252291_s_at	AT3G49120;AT3G49110	2.38681	0.000888	[AT3G49120, PRXCB (PEROXIDASE CB); peroxidase];[AT3G49110, PRXCA (PEROXIDASE CA); peroxidase]
259058_at	AT3G03470	2.38405	0.011202	CYP89A9; electron carrier/ heme binding / iron ion binding / monooxygenase/ oxygen binding
264124_at	AT1G79360	2.37851	0.004951	ATOCT2 (ARABIDOPSIS THALIANA ORGANIC CATION/CARNITINE TRANSPORTER 2); carbohydrate transmembrane transporter/ sugar:hydrogen symporter
262591_at	AT1G15220	2.37573	0.001507	CCMH; oxidoreductase
247056_at	AT5G66750	2.37573	0.000491	CHR1 (CHROMATIN REMODELING 1); ATPase/ helicase
267288_at	AT2G23680	2.37573	0.010639	stress-responsive protein, putative
255317_at	AT4G04180	2.37295	2.9e-05	AAA-type ATPase family protein
248086_at	AT5G55490	2.36737	0.008124	GEX1 (GAMETE EXPRESSED PROTEIN 1)
252373_at	AT3G48090	2.36457	0.004403	EDS1 (enhanced disease susceptibility 1); lipase/ signal transducer/ triacylglycerol lipase
262019_s_at	AT5G44890;AT1G21020;AT2G29240;AT1G35650;AT3G26530;AT1G08740	2.36177	0.009683	[AT5G44890, transposable element gene];[AT1G21020, transposable element gene];[AT2G29240, transposable element gene];[AT1G35650, transposable element gene];[AT3G26530, transposable element gene];[AT1G08740, transposable element gene]
264843_at	AT1G03400	2.36177	0.000818	2-oxoglutarate-dependent dioxygenase, putative
259979_at	AT1G76600	2.35332	0.0034	unknown protein
262711_at	AT1G16500	2.35332	0.000801	unknown protein
264821_at	AT1G03470	2.3505	0.00035	kinase interacting family protein
260524_at	AT2G47230	2.34767	0.000274	agenet domain-containing protein
253672_at	AT4G29820	2.34767	3.4e-05	CFIM-25
254667_at	AT4G18280	2.34483	0.001405	glycine-rich cell wall protein-related
251251_at	AT3G62220	2.34483	0.000431	serine/threonine protein kinase, putative
255490_at	AT4G02660	2.34483	0.006043	WD-40 repeat family protein / beige-related
253124_at	AT4G36030	2.34199	0.000948	ARO3 (ARMADILLO REPEAT ONLY 3); binding
251739_at	AT3G56170	2.33056	0.000128	CAN (CA-2+ DEPENDENT NUCLEASE); nuclease
261397_at	AT1G79820	2.33056	4.1e-05	SGB1 (SUPPRESSOR OF G PROTEIN BETA1); carbohydrate transmembrane transporter/ sugar:hydrogen symporter
259524_at	AT1G12550	2.33056	0.002326	oxidoreductase family protein
254300_at	AT4G22780	2.32769	0.003616	ACR7; amino acid binding
263882_at	AT2G21790	2.32769	0.001483	RNR1 (RIBONUCLEOTIDE REDUCTASE 1); ATP binding / protein binding / ribonucleoside-diphosphate reductase
258376_at	AT3G17680	2.32769	0.003337	FUNCTIONS IN: molecular_function unknown; INVOLVED IN: biological_process unknown; LOCATED IN: cellular_component unknown; EXPRESSED IN: 16 plant structures; EXPRESSED DURING: 8 growth stages; CONTAINS InterPro DOMAIN/s: KIP1-like (InterPro:IPR011684); BEST Arabidopsis thaliana protein match is: unknown protein (TAIR:AT1G48405.1); Has 75 Blast hits to 73 proteins in 16 species: Archae - 0; Bacter…
246289_at	AT3G56880	2.32481	0.006358	VQ motif-containing protein
248981_at	AT5G45110	2.32193	0.002127	NPR3 (NPR1-LIKE PROTEIN 3); protein binding
257185_at	AT3G13100	2.31904	0.003961	ATMRP7; ATPase, coupled to transmembrane movement of substances
254797_at	AT4G13030	2.31615	0.000177	unknown protein
260303_at	AT1G70520	2.31615	0.002533	protein kinase family protein
255715_s_at	AT4G00320;AT5G41830	2.31034	0.004968	[AT4G00320, F-box family protein];[AT5G41830, F-box family protein-related]
265039_at	AT1G04000	2.31034	0.006942	unknown protein
264635_at	AT1G65500	2.30743	0.006662	unknown protein
250595_at	AT5G07770	2.30451	0.004336	formin homology 2 domain-containing protein / FH2 domain-containing protein
250628_at	AT5G07380	2.30159	0.003253	unknown protein
247071_at	AT5G66640	2.29866	0.006463	DAR3 (DA1-RELATED PROTEIN 3)
252370_at	no_match	2.29866	0.005989	no_match
258382_at	AT3G15355	2.29572	0.000778	UBC25 (UBIQUITIN-CONJUGATING ENZYME 25); small conjugating protein ligase
252880_at	AT4G39730	2.29572	0.01291	lipid-associated family protein
256624_at	AT3G19990	2.29572	3.6e-05	unknown protein
248239_at	AT5G53920	2.29278	0.002249	ribosomal protein L11 methyltransferase-related
262255_at	AT1G53790	2.29278	0.00908	F-box family protein
259911_at	AT1G72680	2.28688	0.002416	cinnamyl-alcohol dehydrogenase, putative
248738_at	AT5G48020	2.28096	0.000316	unknown protein
247241_at	AT5G64680	2.27501	1.3e-05	unknown protein
263776_s_at	AT2G46440;AT2G46430	2.27501	0.010647	[AT2G46440, ATCNGC11 (CYCLIC NUCLEOTIDE-GATED CHANNELS); calmodulin binding / cation channel/ cyclic nucleotide binding / ion channel];[AT2G46430, ATCNGC3 (CYCLIC NUCLEOTIDE GATED CHANNEL 3); calmodulin binding / cyclic nucleotide binding / ion channel]
252527_at	AT3G46440	2.27501	0.003129	UXS5; UDP-glucuronate decarboxylase/ catalytic
251277_at	AT3G61760	2.27202	0.001251	ADL1B (ARABIDOPSIS DYNAMIN-LIKE 1B); GTP binding / GTPase
259992_at	AT1G67970	2.26903	0.009293	AT-HSFA8; DNA binding / transcription factor
252114_at	AT3G51450	2.26903	8.1e-05	strictosidine synthase family protein
267144_at	AT2G38110	2.26303	0.004203	GPAT6 (GLYCEROL-3-PHOSPHATE ACYLTRANSFERASE 6); 1-acylglycerol-3-phosphate O-acyltransferase/ acyltransferase
263681_at	AT1G26840	2.26303	0.000292	ORC6 (ORIGIN RECOGNITION COMPLEX PROTEIN 6); DNA binding
253103_at	AT4G36110	2.26003	0.002183	auxin-responsive protein, putative
247925_at	AT5G57560	2.26003	0.009917	TCH4 (Touch 4); hydrolase, acting on glycosyl bonds / xyloglucan:xyloglucosyl transferase
257788_at	AT3G27010	2.25399	6.6e-05	AT-TCP20; transcription factor
263258_at	AT1G10540	2.24793	0.002763	xanthine/uracil permease family protein
248932_at	AT5G46050	2.24793	0.005486	PTR3 (PEPTIDE TRANSPORTER 3); dipeptide transporter/ transporter/ tripeptide transporter
260243_at	AT1G63720	2.23879	0.002585	EXPRESSED IN: 21 plant structures; EXPRESSED DURING: 13 growth stages; BEST Arabidopsis thaliana protein match is: hydroxyproline-rich glycoprotein family protein (TAIR:AT5G52430.1); Has 406 Blast hits to 313 proteins in 78 species: Archae - 0; Bacteria - 2; Metazoa - 123; Fungi - 81; Plants - 111; Viruses - 14; Other Eukaryotes - 75 (source: NCBI BLink).
255297_x_at	AT4G04820;AT2G12680;AT5G35025	2.23879	0.002071	[AT4G04820, transposable element gene];[AT2G12680, transposable element gene];[AT5G35025, transposable element gene]
252525_at	AT3G46450	2.23573	0.001675	SEC14 cytosolic factor family protein / phosphoglyceride transfer family protein
267305_at	AT2G30070	2.23573	0.000942	ATKT1 (POTASSIUM TRANSPORTER 1); potassium ion transmembrane transporter
261193_at	AT1G32920	2.23266	0.00177	unknown protein
258606_at	AT3G02840	2.23266	0.007728	immediate-early fungal elicitor family protein
259129_at	AT3G02150	2.22342	0.000118	PTF1 (PLASTID TRANSCRIPTION FACTOR 1); transcription factor
253535_at	AT4G31550	2.21723	0.005781	WRKY11; calmodulin binding / transcription factor
256389_at	AT3G06220	2.21723	0.00284	DNA binding / transcription factor
262213_at	AT1G74870	2.21412	0.010424	protein binding / zinc ion binding
250473_at	AT5G10220	2.20789	0.011792	ANN6 (ANNEXIN ARABIDOPSIS 6); calcium ion binding / calcium-dependent phospholipid binding
266995_at	AT2G34500	2.20477	0.013189	CYP710A1 (cytochrome P450, family 710, subfamily A, polypeptide 1); C-22 sterol desaturase/ oxygen binding
264945_at	AT1G77080	2.20163	0.001894	MAF1 (MADS AFFECTING FLOWERING 1); transcription factor
253830_at	AT4G27652	2.20163	0.009404	unknown protein
258318_at	AT3G22680	2.20163	0.000126	unknown protein
255527_at	AT4G02360	2.19849	0.000175	unknown protein
246744_at	AT5G27760	2.19849	0.000983	hypoxia-responsive family protein
253919_at	AT4G27350	2.19849	0.000924	unknown protein
249273_at	AT5G41850	2.19535	0.005672	unknown protein
255599_at	AT4G01010	2.18903	0.004855	ATCNGC13; calmodulin binding / cyclic nucleotide binding / ion channel
258526_at	AT3G06790	2.18903	0.000146	plastid developmental protein DAG, putative
245390_at	AT4G17650	2.18587	0.002045	aromatic-rich family protein
264940_at	AT1G60470	2.18269	0.001804	AtGolS4 (Arabidopsis thaliana galactinol synthase 4); transferase, transferring glycosyl groups / transferase, transferring hexosyl groups
261950_at	AT1G64620	2.17951	0.010027	Dof-type zinc finger domain-containing protein
251875_at	AT3G54270	2.17951	0.000705	sucrose-phosphatase 3 (SPP3)
263758_s_at	AT2G21260;AT2G21250	2.17951	0.006835	[AT2G21260, mannose 6-phosphate reductase (NADPH-dependent), putative];[AT2G21250, mannose 6-phosphate reductase (NADPH-dependent), putative]
247455_at	AT5G62470	2.17951	0.001118	MYB96 (myb domain protein 96); DNA binding / transcription factor
245869_at	AT1G26330	2.17951	0.006798	DNA binding
251707_at	AT3G56490	2.17632	0.000352	zinc-binding protein, putative / protein kinase C inhibitor, putative
263582_at	AT2G17120	2.17632	0.00156	LYM2 (LYSM DOMAIN GPI-ANCHORED PROTEIN 2 PRECURSOR)
245419_at	AT4G17380	2.17313	0.006657	MSH4 (MUTS HOMOLOG 4); ATP binding / damaged DNA binding / mismatched DNA binding
247327_at	AT5G64120	2.16993	0.012091	peroxidase, putative
263515_at	AT2G21640	2.16993	0.006732	Encodes a protein of unknown function that is a marker for oxidative stress response.
256449_at	AT1G33460	2.16672	0.003867	transposable element gene
258252_at	AT3G15720	2.1635	0.009147	glycoside hydrolase family 28 protein / polygalacturonase (pectinase) family protein
261973_at	AT1G64610	2.1635	0.005515	WD-40 repeat family protein
261460_at	AT1G07880	2.1635	0.009322	ATMPK13; MAP kinase/ kinase
245064_at	AT2G39725	2.16027	0.00946	complex 1 family protein / LVR family protein
258921_at	AT3G10500	2.16027	0.003632	anac053 (Arabidopsis NAC domain containing protein 53); transcription factor
251916_at	AT3G53960	2.16027	0.006913	proton-dependent oligopeptide transport (POT) family protein
259508_at	AT1G43920	2.15704	0.001354	transposable element gene
257022_at	AT3G19580	2.15056	0.010733	AZF2 (ARABIDOPSIS ZINC-FINGER PROTEIN 2); DNA binding / nucleic acid binding / transcription factor/ transcription repressor/ zinc ion binding
247124_at	AT5G66060	2.15056	9.4e-05	iron ion binding / oxidoreductase/ oxidoreductase, acting on paired donors, with incorporation or reduction of molecular oxygen, 2-oxoglutarate as one donor, and incorporation of one atom each of oxygen into both donors
251369_at	AT3G60480	2.14731	0.000141	unknown protein
261034_s_at	AT1G59077;AT1G17450;AT1G59453;AT1G58766	2.14405	0.002451	[AT1G59077, INVOLVED IN: biological_process unknown; BEST Arabidopsis thaliana protein match is: transcription factor-related (TAIR:AT1G59453.1); Has 32 Blast hits to 28 proteins in 7 species: Archae - 0; Bacteria - 0; Metazoa - 7; Fungi - 0; Plants - 25; Viruses - 0; Other Eukaryotes - 0 (source: NCBI BLink).];[AT1G17450, FUNCTIONS IN: molecular_function unknown; CONTAINS InterPro DOMAIN/s: B-bl…
266616_at	AT2G29680	2.14078	0.000971	CDC6 (CELL DIVISION CONTROL 6)
246827_at	AT5G26330	2.14078	0.002595	plastocyanin-like domain-containing protein / mavicyanin, putative
251946_at	AT3G53540	2.14078	0.00105	unknown protein
256759_at	AT3G25640	2.1375	0.005571	unknown protein
263931_at	AT2G36220	2.1375	4.1e-05	unknown protein
258078_at	AT3G25870	2.13422	0.005338	unknown protein
255964_at	AT1G22275	2.13093	0.009839	ZYP1b
253104_at	AT4G36010	2.13093	0.012325	pathogenesis-related thaumatin family protein
252155_at	AT3G50920	2.12763	0.000171	phosphatidic acid phosphatase-related / PAP2-related
266593_at	AT2G46200	2.12763	0.003171	unknown protein
260771_at	AT1G49160	2.12433	0.002044	WNK7; kinase/ protein kinase
261401_at	AT1G79640	2.12433	0.001347	ATP binding / kinase/ protein kinase/ protein serine/threonine kinase/ protein tyrosine kinase
267490_at	AT2G19130	2.12433	0.007036	S-locus lectin protein kinase family protein
257482_x_at	AT1G27820	2.12102	0.00991	CCR4-NOT transcription complex protein, putative
250049_at	AT5G17780	2.12102	0.000695	hydrolase, alpha/beta fold family protein
266130_at	AT2G44980	2.1177	0.002037	transcription regulatory protein SNF2, putative
255792_at	AT2G33620	2.1177	0.002231	DNA-binding family protein / AT-hook protein 1 (AHP1)
247231_at	AT5G65230	2.11437	0.002625	AtMYB53 (myb domain protein 53); DNA binding / transcription factor
265200_s_at	AT2G36800;AT2G36790	2.11437	0.004988	[AT2G36800, DOGT1 (DON-GLUCOSYLTRANSFERASE 1); UDP-glycosyltransferase/ cis-zeatin O-beta-D-glucosyltransferase/ glucosyltransferase/ quercetin 4'-O-glucosyltransferase/ quercetin 7-O-glucosyltransferase/ trans-zeatin O-beta-D-glucosyltransferase/ transferase, transf];[AT2G36790, UGT73C6 (UDP-glucosyl transferase 73C6); UDP-glucosyltransferase/ UDP-glycosyltransferase/ quercetin 3-O-glucosyltrans…
250914_at	AT5G03780	2.10434	0.002085	TRFL10 (TRF-LIKE 10); DNA binding
248842_at	AT5G46850	2.10098	0.001974	FUNCTIONS IN: molecular_function unknown; INVOLVED IN: GPI anchor biosynthetic process; LOCATED IN: endoplasmic reticulum membrane; EXPRESSED IN: 22 plant structures; EXPRESSED DURING: 13 growth stages; CONTAINS InterPro DOMAIN/s: PIG-X/PBN1 (InterPro:IPR013233); Has 52 Blast hits to 52 proteins in 24 species: Archae - 0; Bacteria - 0; Metazoa - 31; Fungi - 4; Plants - 13; Viruses - 0; Other Euka…
267467_at	AT2G30580	2.09424	0.00124	DRIP2 (DREB2A-INTERACTING PROTEIN 2); protein binding / ubiquitin-protein ligase/ zinc ion binding
261762_at	AT1G15510	2.09085	0.002998	pentatricopeptide (PPR) repeat-containing protein
245748_at	AT1G51140	2.09085	0.002262	basic helix-loop-helix (bHLH) family protein
267469_at	AT2G30590	2.08406	0.000128	WRKY21; calmodulin binding / transcription factor
257139_at	AT3G28890	2.08406	0.001159	AtRLP43 (Receptor Like Protein 43); kinase/ protein binding
264751_at	AT1G23020	2.08066	0.00668	FRO3; ferric-chelate reductase
260666_at	AT1G19300	2.08066	0.005419	PARVUS (PARVUS); polygalacturonate 4-alpha-galacturonosyltransferase/ transferase, transferring glycosyl groups / transferase, transferring hexosyl groups
246796_at	AT5G26770	2.07724	0.011072	unknown protein
251650_at	AT3G57360	2.07724	0.00592	unknown protein
262314_at	AT1G70810	2.07724	0.000887	C2 domain-containing protein
254891_at	AT4G11740	2.07724	1.3e-05	SAY1
249397_at	AT5G40230	2.07724	0.000795	nodulin-related
251273_at	AT3G61960	2.07382	0.002567	protein kinase family protein
249225_at	AT5G42140	2.07382	0.000171	zinc finger protein, putative / regulator of chromosome condensation (RCC1) family protein
259776_s_at	AT1G29590;AT1G29550	2.07382	0.008034	[AT1G29590, eukaryotic translation initiation factor 4E, putative / eIF-4E, putative / eIF4E, putative / mRNA cap-binding protein, putative];[AT1G29550, eukaryotic translation initiation factor 4E, putative / eIF-4E, putative / eIF4E, putative / mRNA cap-binding protein, putative]
256457_at	AT1G75230	2.07039	0.001468	HhH-GPD base excision DNA repair family protein
266411_at	AT2G38730	2.07039	0.005015	peptidyl-prolyl cis-trans isomerase, putative / cyclophilin, putative / rotamase, putative
262829_at	AT1G14970	2.06695	0.002877	unknown protein
261026_at	AT1G01240	2.06695	0.012918	unknown protein
267623_at	AT2G39650	2.06695	0.005404	unknown protein
250149_at	AT5G14700	2.06695	0.00064	cinnamoyl-CoA reductase-related
252019_at	AT3G53040	2.06695	0.005971	late embryogenesis abundant protein, putative / LEA protein, putative
254747_at	AT4G13020	2.06695	0.001629	MHK; ATP binding / kinase/ protein kinase/ protein serine/threonine kinase
266485_at	AT2G47630	2.06695	0.004672	esterase/lipase/thioesterase family protein
246810_at	AT5G27160	2.06695	0.005479	transposable element gene
253175_at	AT4G35050	2.0635	0.000866	MSI3 (MULTICOPY SUPPRESSOR OF IRA1 3); protein binding
249080_at	AT5G43990	2.06005	0.00136	SUVR2; histone-lysine N-methyltransferase/ zinc ion binding
253157_at	AT4G35740	2.06005	0.008223	RecQl3; ATP binding / ATP-dependent helicase/ helicase/ nucleic acid binding
259706_at	AT1G77540	2.06005	0.001791	H3/H4 histone acetyltransferase
260550_at	AT2G43420	2.05658	8.8e-05	3-beta hydroxysteroid dehydrogenase/isomerase family protein
246552_at	AT5G15420	2.05658	0.005566	unknown protein
264027_at	AT2G03670	2.05311	0.00131	CDC48B; ATP binding / ATPase/ nucleoside-triphosphatase/ nucleotide binding
248544_at	no_match	2.05311	0.001265	no_match
261000_at	AT1G26540	2.05311	0.001054	agenet domain-containing protein
252573_at	AT3G45260	2.05311	0.001887	zinc finger (C2H2 type) family protein
266416_at	AT2G38710	2.05311	0.002589	AMMECR1 family
256062_at	AT1G07090	2.05311	0.011397	LSH6 (LIGHT SENSITIVE HYPOCOTYLS 6)
251541_at	AT3G58750	2.04963	0.000633	CSY2 (citrate synthase 2); citrate (SI)-synthase
256289_s_at	AT3G12240;AT3G12230	2.04963	0.003224	[AT3G12240, SCPL15 (serine carboxypeptidase-like 15); serine-type carboxypeptidase];[AT3G12230, scpl14 (serine carboxypeptidase-like 14); serine-type carboxypeptidase]
248147_at	AT5G54900	2.04614	0.001258	ATRBP45A (RNA-binding protein 45A); RNA binding
245522_at	AT4G15890	2.04264	6.5e-05	binding
265766_at	AT2G48080	2.03914	0.003978	oxidoreductase, 2OG-Fe(II) oxygenase family protein
255666_at	AT4G00390	2.03914	0.001016	transcription regulator
255881_at	AT1G67070	2.03914	0.000961	DIN9 (DARK INDUCIBLE 9); mannose-6-phosphate isomerase
263264_at	AT2G38810	2.03562	0.005013	HTA8 (HISTONE H2A 8); DNA binding
261479_at	AT1G14380	2.03562	0.000546	IQD28 (IQ67 DOMAIN PROTEIN 28); calmodulin binding
253147_at	AT4G35600	2.03562	0.00655	CONNEXIN 32; ATP binding / kinase/ protein kinase/ protein serine/threonine kinase
260096_at	AT1G73240	2.03562	0.007287	unknown protein
255702_at	AT4G00230	2.0321	0.003203	XSP1 (xylem serine peptidase 1); identical protein binding / serine-type endopeptidase
263476_at	AT2G31870	2.02857	0.00012	TEJ (Sanskrit for 'bright'); poly(ADP-ribose) glycohydrolase
265433_at	AT2G20950	2.02857	0.012695	EXPRESSED IN: 23 plant structures; EXPRESSED DURING: 13 growth stages; CONTAINS InterPro DOMAIN/s: Phospholipase-like, arabidopsis (InterPro:IPR007942); BEST Arabidopsis thaliana protein match is: unknown protein (TAIR:AT4G38550.1); Has 618 Blast hits to 562 proteins in 105 species: Archae - 7; Bacteria - 22; Metazoa - 391; Fungi - 75; Plants - 96; Viruses - 2; Other Eukaryotes - 25 (source: NCBI…
245296_at	AT4G16370	2.02857	0.004958	ATOPT3 (OLIGOPEPTIDE TRANSPORTER); oligopeptide transporter
251241_s_at	AT3G62460;AT3G62530	2.02503	0.002191	[AT3G62460, INVOLVED IN: biological_process unknown; LOCATED IN: mitochondrion; EXPRESSED IN: male gametophyte; EXPRESSED DURING: M germinated pollen stage; CONTAINS InterPro DOMAIN/s: Protein of unknown function DUF537 (InterPro:IPR007491); BEST Arabidopsis thaliana protein match is: PBS lyase HEAT-like repeat-containing protein (TAIR:AT3G62530.1); Has 68 Blast hits to 66 proteins in 5 species: …
249019_at	AT5G44780	2.02503	0.00813	unknown protein
261398_at	AT1G79610	2.02503	0.000901	sodium proton exchanger, putative (NHX6)
253405_at	AT4G32800	2.02148	0.011157	AP2 domain-containing transcription factor TINY, putative
263157_at	AT1G54100	2.01792	0.006021	ALDH7B4 (Aldehyde Dehydrogenase 7B4); 3-chloroallyl aldehyde dehydrogenase/ oxidoreductase
266886_at	AT2G44745	2.01792	0.00961	WRKY family transcription factor
254812_at	AT4G12250	2.01792	0.005539	GAE5 (UDP-D-GLUCURONATE 4-EPIMERASE 5); UDP-glucuronate 4-epimerase/ catalytic
266993_at	AT2G39210	2.01436	0.011256	nodulin family protein
265999_at	AT2G24100	2.01436	6.7e-05	unknown protein
258687_at	AT3G07860	2.01436	0.001784	unknown protein
246235_at	AT4G36830	2.01078	0.002962	GNS1/SUR4 membrane family protein
256185_at	AT1G51700	2.01078	0.001926	ADOF1; DNA binding / transcription factor
261086_at	AT1G17460	2.01078	0.007745	TRFL3 (TRF-LIKE 3); DNA binding / transcription factor
264506_at	AT1G09560	2.01078	0.004472	GLP5 (GERMIN-LIKE PROTEIN 5); manganese ion binding / nutrient reservoir
264537_at	AT1G55610	2.0072	5.1e-05	BRL1 (BRI 1 LIKE); kinase
261741_at	AT1G47870	2.0072	1.4e-05	ATE2F2; DNA binding / protein heterodimerization/ transcription factor
265879_at	AT2G42450	2.0072	0.000413	lipase class 3 family protein
259747_at	AT1G71170	2.0072	0.000766	6-phosphogluconate dehydrogenase NAD-binding domain-containing protein
250177_at	AT5G14420	2.0036	0.000396	RGLG2 (RING domain Ligase2); ubiquitin-protein ligase
258403_at	AT3G15380	2.0036	0.000391	choline transporter-related
251123_at	AT5G01030	2.0036	0.001094	unknown protein
250370_at	AT5G11430	2.0036	0.000197	zinc ion binding
255064_at	AT4G08950	2	0.011285	EXO (EXORDIUM)
249688_at	AT5G36160	2	0.000642	aminotransferase-related
248941_s_at	AT5G45460;AT5G45470	2	0.000697	[AT5G45460, unknown protein];[AT5G45470, unknown protein]
255628_at	AT4G00850	2	0.000666	GIF3 (GRF1-INTERACTING FACTOR 3); protein binding / transcription coactivator
265922_at	AT2G18480	2	0.012178	mannitol transporter, putative
264762_at	AT1G61460	1.99639	5e-06	S-locus protein kinase, putative
256429_at	AT3G11040	1.99639	1.5e-05	glycosyl hydrolase family 85 protein
247929_at	AT5G57330	1.99277	0.002003	aldose 1-epimerase family protein
248562_at	AT5G49680	1.99277	0.001295	cell expansion protein, putative
258242_at	AT3G27640	1.99277	0.002093	transducin family protein / WD-40 repeat family protein
245611_at	AT4G14390	1.98914	0.00026	ankyrin repeat family protein
260206_at	AT1G70740	1.9855	0.010653	protein kinase family protein
248058_at	AT5G55530	1.9855	0.001621	C2 domain-containing protein
250358_at	AT5G11740	1.9855	7.9e-05	AGP15 (ARABINOGALACTAN PROTEIN 15)
246417_at	AT5G16990	1.9855	0.003725	NADP-dependent oxidoreductase, putative
261681_at	AT1G47340	1.9855	0.00275	F-box family protein
258437_at	AT3G16560	1.98185	0.007155	protein phosphatase 2C-related / PP2C-related
264375_at	AT2G25090	1.98185	0.006092	CIPK16 (CBL-INTERACTING PROTEIN KINASE 16); ATP binding / kinase/ protein kinase/ protein serine/threonine kinase
254390_at	AT4G21940	1.9782	0.003974	CPK15; ATP binding / calcium ion binding / calmodulin-dependent protein kinase/ kinase/ protein kinase/ protein serine/threonine kinase
247264_at	AT5G64530	1.9782	0.002557	XND1; transcription factor
246094_at	AT5G19300	1.9782	0.000512	FUNCTIONS IN: molecular_function unknown; INVOLVED IN: biological_process unknown; LOCATED IN: cellular_component unknown; EXPRESSED IN: 20 plant structures; EXPRESSED DURING: 13 growth stages; CONTAINS InterPro DOMAIN/s: Nucleic acid-binding, OB-fold-like (InterPro:IPR016027), Protein of unknown function DUF171 (InterPro:IPR003750); Has 4766 Blast hits to 2044 proteins in 217 species: Archae - 7…
262129_at	AT1G52500	1.9782	0.003374	ATMMH-1 (ARABIDOPSIS THALIANA MUTM HOMOLOG-1); DNA N-glycosylase
252037_at	AT3G51920	1.97453	0.004852	CAM9 (CALMODULIN 9); calcium ion binding
249237_at	AT5G42050	1.97453	0.004605	FUNCTIONS IN: molecular_function unknown; EXPRESSED IN: 22 plant structures; EXPRESSED DURING: 13 growth stages; CONTAINS InterPro DOMAIN/s: Development and cell death domain (InterPro:IPR013989), Kelch related (InterPro:IPR013089); BEST Arabidopsis thaliana protein match is: unknown protein (TAIR:AT3G27090.1); Has 5084 Blast hits to 2870 proteins in 85 species: Archae - 0; Bacteria - 24; Metazoa…
259441_at	AT1G02300	1.97085	0.000476	cathepsin B-like cysteine protease, putative
247449_at	AT5G62290	1.96717	0.000635	nucleotide-sensitive chloride conductance regulator (ICln) family protein
254850_at	AT4G12000	1.96717	0.002093	INVOLVED IN: response to oxidative stress; EXPRESSED IN: 22 plant structures; EXPRESSED DURING: 13 growth stages; CONTAINS InterPro DOMAIN/s: SNARE associated Golgi protein (InterPro:IPR015414); BEST Arabidopsis thaliana protein match is: unknown protein (TAIR:AT4G22850.1); Has 1153 Blast hits to 1150 proteins in 277 species: Archae - 2; Bacteria - 485; Metazoa - 104; Fungi - 24; Plants - 140; Vi…
247125_at	AT5G66070	1.96347	0.012702	zinc finger (C3HC4-type RING finger) family protein
249442_at	AT5G39590	1.96347	0.007071	FUNCTIONS IN: molecular_function unknown; INVOLVED IN: N-terminal protein myristoylation; LOCATED IN: cellular_component unknown; EXPRESSED IN: 24 plant structures; EXPRESSED DURING: 15 growth stages; CONTAINS InterPro DOMAIN/s: TLDc (InterPro:IPR006571); Has 144 Blast hits to 144 proteins in 62 species: Archae - 0; Bacteria - 0; Metazoa - 76; Fungi - 9; Plants - 26; Viruses - 0; Other Eukaryotes…
247567_at	AT5G61190	1.95977	0.005839	zinc finger protein-related
258996_at	AT3G01800	1.95977	0.002081	ribosome recycling factor family protein / ribosome releasing factor family protein
263865_at	AT2G36910	1.95977	0.000168	ABCB1 (ATP BINDING CASSETTE SUBFAMILY B1); ATPase, coupled to transmembrane movement of substances / auxin efflux transmembrane transporter/ calmodulin binding
256596_at	AT3G28540	1.95977	0.001456	AAA-type ATPase family protein
250053_at	AT5G17850	1.95977	0.013188	cation exchanger, putative (CAX8)
250270_at	AT5G12980	1.95977	0.002474	rcd1-like cell differentiation protein, putative
257825_at	AT3G26700	1.95606	0.000815	protein kinase family protein
249977_at	AT5G18820	1.95233	0.004591	EMB3007 (embryo defective 3007); ATP binding / protein binding
258695_at	AT3G09640	1.95233	0.003962	APX2 (ASCORBATE PEROXIDASE 2); L-ascorbate peroxidase
246351_at	AT1G16570	1.95233	0.000941	glycosyl transferase family 1 protein
249096_at	AT5G43910	1.9486	0.007037	pfkB-type carbohydrate kinase family protein
259661_at	AT1G55265	1.9486	0.003082	unknown protein
245951_at	AT5G19550	1.9486	0.002923	ASP2 (ASPARTATE AMINOTRANSFERASE 2); L-aspartate:2-oxoglutarate aminotransferase
264929_at	AT1G60730	1.9486	0.002422	aldo/keto reductase family protein
247597_at	AT5G60860	1.9486	0.010167	AtRABA1f (Arabidopsis Rab GTPase homolog A1f); GTP binding
264608_at	AT1G04710	1.9486	0.000154	PKT4 (PEROXISOMAL 3-KETOACYL-COA THIOLASE 4); acetyl-CoA C-acyltransferase/ catalytic
248945_at	AT5G45510	1.94486	0.000947	leucine-rich repeat family protein
259425_at	AT1G01460	1.94111	0.009044	PIPK11; 1-phosphatidylinositol-4-phosphate 5-kinase/ phosphatidylinositol phosphate kinase
249692_s_at	AT5G36740;AT5G36670	1.94111	0.002658	[AT5G36740, PHD finger family protein];[AT5G36670, PHD finger family protein]
251975_at	AT3G53230	1.93357	0.004971	cell division cycle protein 48, putative / CDC48, putative
257470_at	AT1G53770	1.92979	1e-05	unknown protein
264674_at	AT1G09815	1.92979	0.00023	POLD4 (POLYMERASE DELTA 4); DNA-directed DNA polymerase
246582_at	AT1G31750	1.9222	0.008988	proline-rich family protein
259740_at	AT1G64300	1.9222	0.004433	protein kinase family protein
248476_at	AT5G50890	1.91839	0.002195	LOCATED IN: cellular_component unknown; EXPRESSED IN: 17 plant structures; EXPRESSED DURING: 13 growth stages; BEST Arabidopsis thaliana protein match is: lipase class 3 family protein (TAIR:AT2G05260.1); Has 115 Blast hits to 115 proteins in 7 species: Archae - 0; Bacteria - 0; Metazoa - 0; Fungi - 0; Plants - 115; Viruses - 0; Other Eukaryotes - 0 (source: NCBI BLink).
248629_at	AT5G48970	1.91839	0.000865	mitochondrial substrate carrier family protein
260252_at	AT1G74240	1.91839	0.000829	mitochondrial substrate carrier family protein
262713_at	AT1G16520	1.91839	0.003828	unknown protein
260394_at	AT1G74080	1.91839	0.005331	MYB122 (MYB DOMAIN PROTEIN 122); DNA binding / transcription factor
263012_at	no_match	1.91073	0.001878	no_match
260760_at	AT1G49170	1.91073	0.000523	unknown protein
254445_at	AT4G20930	1.91073	0.000412	3-hydroxyisobutyrate dehydrogenase, putative
246981_at	AT5G04840	1.91073	0.00888	bZIP protein
258576_at	AT3G04230	1.91073	0.001152	40S ribosomal protein S16 (RPS16B)
254932_at	AT4G11120	1.91073	0.002527	translation elongation factor Ts (EF-Ts), putative
267223_at	AT2G43980	1.90689	0.009556	AtITPK4 (inositol 1,3,4-trisphosphate 5/6-kinase 4); ATP binding / catalytic/ inositol tetrakisphosphate 1-kinase/ inositol-1,3,4-trisphosphate 5/6-kinase/ magnesium ion binding
252068_at	AT3G51440	1.90689	0.007079	strictosidine synthase family protein
264928_at	AT1G60710	1.90689	0.010647	ATB2; oxidoreductase
249926_at	AT5G19180	1.90304	0.000427	ECR1 (E1 C-terminal related 1); NEDD8 activating enzyme/ protein heterodimerization/ small protein activating enzyme
259087_at	AT3G04980	1.90304	0.001757	DNAJ heat shock N-terminal domain-containing protein
267080_at	AT2G41190	1.90304	0.002961	amino acid transporter family protein
246036_at	AT5G08370	1.89918	0.012025	AtAGAL2 (Arabidopsis thaliana ALPHA-GALACTOSIDASE 2); alpha-galactosidase/ catalytic/ hydrolase, hydrolyzing O-glycosyl compounds
256998_at	AT3G14180	1.8953	0.005999	transcription factor
250492_at	AT5G09790	1.8953	0.003951	ATXR5; DNA binding / protein binding
257463_at	AT1G14820	1.89142	0.011271	SEC14 cytosolic factor family protein / phosphoglyceride transfer family protein
258524_at	AT3G06810	1.89142	0.005337	IBR3 (IBA-RESPONSE 3); acyl-CoA dehydrogenase/ oxidoreductase
260515_at	AT1G51460	1.89142	0.006201	ABC transporter family protein
257087_at	AT3G20500	1.89142	0.008032	PAP18 (PURPLE ACID PHOSPHATASE 18); acid phosphatase/ protein serine/threonine phosphatase
247857_at	AT5G58400	1.89142	5e-06	peroxidase, putative
249255_at	AT5G41610	1.89142	0.001721	ATCHX18; monovalent cation:proton antiporter/ sodium:hydrogen antiporter
249026_at	AT5G44785	1.89142	0.003851	OSB3 (ORGANELLAR SINGLE-STRANDED DNA BINDING PROTEIN 3); single-stranded DNA binding
260900_s_at	AT5G34780;AT1G21400	1.88753	0.012305	[AT5G34780, dehydrogenase E1 component family protein];[AT1G21400, 2-oxoisovalerate dehydrogenase, putative / 3-methyl-2-oxobutanoate dehydrogenase, putative / branched-chain alpha-keto acid dehydrogenase E1 alpha subunit, putative]
260772_at	AT1G49050	1.88753	0.001336	aspartyl protease family protein
247204_at	AT5G64990	1.88753	0.004824	AtRABH1a (Arabidopsis Rab GTPase homolog H1a); GTP binding
254375_at	AT4G21800	1.88753	7.9e-05	QQT2 (quatre-quart2); ATP binding / nucleotide binding
251432_at	AT3G59820	1.88362	0.011484	calcium-binding mitochondrial protein-related
264362_at	AT1G03290	1.88362	0.001202	unknown protein
255283_at	AT4G04620	1.87971	0.00167	ATG8B (autophagy 8b); microtubule binding
265065_at	AT1G03980	1.87971	0.000903	ATPCS2 (phytochelatin synthase 2); glutathione gamma-glutamylcysteinyltransferase
261650_at	AT1G27770	1.87578	0.009419	ACA1 (AUTO-INHIBITED CA2+-ATPASE 1); calcium channel/ calcium-transporting ATPase/ calmodulin binding
254911_at	AT4G11100	1.87578	0.003982	unknown protein
253865_at	AT4G27470	1.87578	0.000562	zinc finger (C3HC4-type RING finger) family protein
254026_at	AT4G25800	1.87578	0.000647	calmodulin-binding protein
259908_at	AT1G60850	1.87184	0.00073	ATRPAC42; DNA binding / DNA-directed RNA polymerase/ protein dimerization
266621_at	AT2G35450	1.8679	0.000394	catalytic/ hydrolase
252986_at	AT4G38380	1.8679	0.005798	antiporter/ drug transporter
256939_at	AT3G22630	1.8679	0.000923	PBD1 (20S PROTEASOME BETA SUBUNIT D1); peptidase/ threonine-type endopeptidase
264717_at	AT1G70140	1.8679	0.000836	ATFH8 (formin 8); actin binding / actin filament binding / profilin binding
261972_at	AT1G64600	1.8679	0.001227	copper ion binding / methyltransferase
262571_at	AT1G15430	1.86394	0.004589	FUNCTIONS IN: molecular_function unknown; INVOLVED IN: biological_process unknown; LOCATED IN: cellular_component unknown; EXPRESSED IN: 24 plant structures; EXPRESSED DURING: 15 growth stages; CONTAINS InterPro DOMAIN/s: Protein of unknown function DUF1644 (InterPro:IPR012866); BEST Arabidopsis thaliana protein match is: zinc ion binding (TAIR:AT1G80220.1); Has 144 Blast hits to 135 proteins in …
252948_at	AT4G38600	1.86394	0.007661	KAK (KAKTUS); ubiquitin-protein ligase
253041_at	AT4G37870	1.85997	1.6e-05	PCK1 (PHOSPHOENOLPYRUVATE CARBOXYKINASE 1); ATP binding / phosphoenolpyruvate carboxykinase (ATP)/ phosphoenolpyruvate carboxykinase/ purine nucleotide binding
250829_at	AT5G04720	1.85997	0.00326	ADR1-L2 (ADR1-like 2); ATP binding / nucleoside-triphosphatase/ nucleotide binding / protein binding
266462_at	AT2G47770	1.85997	0.000162	benzodiazepine receptor-related
257610_at	AT3G13810	1.85997	0.010978	AtIDD11 (Arabidopsis thaliana Indeterminate(ID)-Domain 11); nucleic acid binding / transcription factor/ zinc ion binding
264219_at	AT1G60420	1.85997	1e-06	DC1 domain-containing protein
262096_at	AT1G56010	1.85997	0.001163	NAC1; transcription factor
247528_at	AT5G61460	1.85599	0.001942	MIM (hypersensitive to MMS, irradiation and MMC); ATP binding
265192_at	AT1G05060	1.85599	0.005211	unknown protein
251436_at	AT3G59900	1.85599	0.00724	ARGOS (AUXIN-REGULATED GENE INVOLVED IN ORGAN SIZE)
251365_at	AT3G61310	1.852	0.004459	DNA-binding family protein
249163_at	AT5G42740	1.852	0.000814	glucose-6-phosphate isomerase, cytosolic (PGIC)
264293_at	AT1G78770	1.852	0.001478	cell division cycle family protein
258678_at	AT3G08690	1.852	0.001061	UBC11 (UBIQUITIN-CONJUGATING ENZYME 11); ubiquitin-protein ligase
248591_at	AT5G49650	1.852	0.012852	xylulose kinase, putative
258313_at	AT3G15970	1.848	0.000649	Ran-binding protein 1 domain-containing protein / RanBP1 domain-containing protein
253992_at	AT4G26060	1.848	0.002053	unknown protein
245250_at	AT4G17490	1.84398	0.001878	ATERF6 (ETHYLENE RESPONSIVE ELEMENT BINDING FACTOR 6); DNA binding / transcription factor
260143_at	AT1G71880	1.84398	0.006615	SUC1 (Sucrose-proton symporter 1); carbohydrate transmembrane transporter/ sucrose:hydrogen symporter/ sugar:hydrogen symporter
262084_at	AT1G56080	1.83592	0.002103	unknown protein
246048_at	AT5G28880	1.83592	0.003305	transposable element gene
258401_at	AT3G15430	1.83188	0.001521	regulator of chromosome condensation (RCC1) family protein
258519_at	AT3G06760	1.83188	0.001041	INVOLVED IN: response to water deprivation; EXPRESSED IN: 24 plant structures; EXPRESSED DURING: 15 growth stages; CONTAINS InterPro DOMAIN/s: Drought induced 19 (InterPro:IPR008598); BEST Arabidopsis thaliana protein match is: HRB1 (HYPERSENSITIVE TO RED AND BLUE); protein binding (TAIR:AT5G49230.1); Has 133 Blast hits to 133 proteins in 15 species: Archae - 0; Bacteria - 0; Metazoa - 6; Fungi -…
249931_at	AT5G22370	1.83188	0.00291	QQT1 (QUATRE-QUART 1); ATP binding / nucleotide binding
255595_at	AT4G01700	1.82782	0.008916	chitinase, putative
261100_at	AT1G63020	1.82782	0.005416	NRPD1A (NUCLEAR RNA POLYMERASE D 1A); DNA binding / DNA-directed RNA polymerase
246215_at	AT4G37180	1.82375	0.006129	myb family transcription factor
257184_at	AT3G13090	1.82375	0.006481	ATMRP8; ATPase, coupled to transmembrane movement of substances
251052_at	AT5G02470	1.82375	0.001014	DPA; transcription factor
264604_at	AT1G04650	1.82375	0.001258	unknown protein
261654_at	AT1G01920	1.81967	0.003197	SET domain-containing protein
250298_at	AT5G11860	1.81967	0.001317	NLI interacting factor (NIF) family protein
251563_at	AT3G57880	1.81558	0.011052	C2 domain-containing protein
255980_at	AT1G33970	1.81558	0.004962	avirulence-responsive protein, putative / avirulence induced gene protein, putative / AIG protein, putative
249178_at	AT5G42890	1.81558	0.000506	SCP2 (STEROL CARRIER PROTEIN 2); oxidoreductase/ sterol carrier
255553_at	AT4G01960	1.81558	0.009301	unknown protein
266582_at	AT2G46090	1.81558	2.1e-05	diacylglycerol kinase family protein
265196_at	AT2G36740	1.81147	5.8e-05	SWC2; DNA binding / transcription factor
251206_at	AT3G63090	1.80735	0.005098	ubiquitin thiolesterase
252420_at	AT3G47530	1.80735	0.012812	pentatricopeptide (PPR) repeat-containing protein
245268_at	AT4G16570	1.80735	0.00325	PRMT7 (PROTEIN ARGININE METHYLTRANSFERASE 7); methyltransferase
256426_at	AT1G33420	1.80735	0.000348	PHD finger family protein
250431_at	AT5G10440	1.80735	0.00801	CYCD4;2 (cyclin d4;2); cyclin-dependent protein kinase
245932_at	AT5G09290	1.80735	0.005957	3'(2'),5'-bisphosphate nucleotidase, putative / inositol polyphosphate 1-phosphatase, putative
247999_at	AT5G56150	1.80735	0.001699	UBC30 (ubiquitin-conjugating enzyme 30); ubiquitin-protein ligase
266452_at	AT2G43320	1.80323	0.001231	unknown protein
247437_at	AT5G62490	1.80323	0.012529	ATHVA22B
258593_at	AT3G04480	1.80323	0.00858	endoribonuclease
251062_at	AT5G01840	1.79909	0.011471	OFP1 (OVATE FAMILY PROTEIN 1); protein binding / transcription repressor
250365_at	AT5G11410	1.79909	0.012819	protein kinase family protein
260943_at	AT1G45145	1.79909	0.003378	ATTRX5; oxidoreductase, acting on sulfur group of donors, disulfide as acceptor
259728_at	AT1G60970	1.79494	0.007752	clathrin adaptor complex small chain family protein
255227_at	AT4G05440	1.79494	0.00942	EDA35 (embryo sac development arrest 35)
265184_at	AT1G23710	1.79494	0.001132	unknown protein
256852_at	AT3G18610	1.79077	0.006236	ATRANGAP1 (RAN GTPASE-ACTIVATING PROTEIN 1); nucleic acid binding / nucleotide binding
248118_at	AT5G55050	1.79077	0.009442	GDSL-motif lipase/hydrolase family protein
253717_at	AT4G29440	1.79077	0.006055	unknown protein
250775_at	AT5G05460	1.7866	0.00038	hydrolase, acting on glycosyl bonds / mannosyl-glycoprotein endo-beta-N-acetylglucosaminidase
254521_at	AT5G44820	1.78241	0.004958	unknown protein
252000_at	AT3G52710	1.78241	0.001233	unknown protein
253691_at	AT4G29660	1.77821	8.7e-05	EMB2752 (EMBRYO DEFECTIVE 2752)
256042_at	AT1G07220	1.77821	0.000167	FUNCTIONS IN: molecular_function unknown; INVOLVED IN: biological_process unknown; LOCATED IN: mitochondrion; EXPRESSED IN: 22 plant structures; EXPRESSED DURING: 13 growth stages; CONTAINS InterPro DOMAIN/s: Lipopolysaccharide-modifying protein (InterPro:IPR006598), Protein of unknown function DUF821, CAP10-like (InterPro:IPR008539); BEST Arabidopsis thaliana protein match is: unknown protein (T…
248715_at	AT5G48290	1.77821	0.005456	heavy-metal-associated domain-containing protein
255583_at	AT4G01510	1.774	0.00359	ARV2
249592_at	AT5G37890	1.774	0.001664	seven in absentia (SINA) protein, putative
262624_at	AT1G06450	1.774	0.006876	CCR4-NOT transcription complex protein, putative
260238_at	AT1G74520	1.774	0.002096	ATHVA22A
263822_at	AT2G40240	1.774	0.008377	pentatricopeptide (PPR) repeat-containing protein
255901_at	AT1G17890	1.774	0.010047	GER2; binding / catalytic/ coenzyme binding
259100_at	AT3G04880	1.76977	0.000101	DRT102 (DNA-DAMAGE-REPAIR/TOLERATION 2)
250604_at	AT5G07830	1.76977	0.002558	AtGUS2 (Arabidopsis thaliana glucuronidase 2); beta-glucuronidase
264741_at	AT1G62290	1.76977	0.003893	aspartyl protease family protein
253085_s_at	AT4G36280	1.76977	0.000361	ATP-binding region, ATPase-like domain-containing protein
264490_at	AT1G27390	1.76553	0.004103	TOM20-2 (TRANSLOCASE OUTER MEMBRANE 20-2); P-P-bond-hydrolysis-driven protein transmembrane transporter/ metal ion binding
252624_at	AT3G44735	1.76553	0.001738	PSK1; growth factor
261347_at	AT1G79730	1.76553	0.009389	ELF7 (EARLY FLOWERING 7)
253866_at	AT4G27480	1.76129	0.0001	glycosyltransferase family 14 protein / core-2/I-branching enzyme family protein
265505_at	AT2G15530	1.76129	0.001195	zinc finger (C3HC4-type RING finger) family protein
248927_at	AT5G45900	1.76129	0.006926	APG7 (AUTOPHAGY 7); APG8 activating enzyme
245901_at	AT5G11060	1.75702	0.004502	KNAT4 (KNOTTED1-LIKE HOMEOBOX GENE 4); transcription activator/ transcription factor
245197_at	AT1G67800	1.75702	0.000295	copine-related
251086_at	AT5G01450	1.75702	0.0029	protein binding / zinc ion binding
246143_at	AT5G19980	1.75702	0.006745	integral membrane family protein
256061_at	AT1G07040	1.75702	0.001078	unknown protein
246906_at	AT5G25475	1.75275	0.00779	DNA binding
254144_at	AT4G24690	1.75275	0.000236	ubiquitin-associated (UBA)/TS-N domain-containing protein / octicosapeptide/Phox/Bemp1 (PB1) domain-containing protein
258074_at	AT3G25890	1.75275	0.006696	AP2 domain-containing transcription factor, putative
257968_at	AT3G27550	1.75275	7.2e-05	group II intron splicing factor CRS1-related
257535_at	AT3G09490	1.75275	0.009263	chloroplast lumen common family protein
257708_at	AT3G13330	1.75275	0.012824	binding
255236_at	AT4G05520	1.74846	0.011074	ATEHD2 (EPS15 HOMOLOGY DOMAIN 2); GTP binding / GTPase/ calcium ion binding
249374_at	AT5G40580	1.74846	0.001561	PBB2; endopeptidase/ peptidase/ threonine-type endopeptidase
257612_at	AT3G26600	1.74846	0.007034	ARO4 (ARMADILLO REPEAT ONLY 4); binding
246756_at	AT5G27930	1.74846	0.000221	protein phosphatase 2C, putative / PP2C, putative
255485_at	AT4G02550	1.74416	0.011249	unknown protein
245699_at	AT5G04250	1.74416	0.002584	OTU-like cysteine protease family protein
261031_at	AT1G17360	1.74416	0.004294	FUNCTIONS IN: molecular_function unknown; INVOLVED IN: biological_process unknown; LOCATED IN: cellular_component unknown; EXPRESSED IN: 22 plant structures; EXPRESSED DURING: 13 growth stages; BEST Arabidopsis thaliana protein match is: COP1-interacting protein-related (TAIR:AT1G72410.1); Has 8834 Blast hits to 6495 proteins in 406 species: Archae - 8; Bacteria - 626; Metazoa - 3389; Fungi - 793…
246610_at	no_match	1.74416	0.004737	no_match
263032_at	AT1G23850	1.74416	0.002156	unknown protein
266471_at	AT2G31060	1.73985	0.002317	elongation factor family protein
266037_at	AT2G05940	1.73118	0.004373	protein kinase, putative
256081_at	AT1G20700	1.73118	0.002725	WOX14 (WUSCHEL RELATED HOMEOBOX 14); DNA binding / transcription factor
258630_at	AT3G02820	1.73118	0.002474	zinc knuckle (CCHC-type) family protein
262496_at	AT1G21790	1.72683	0.011635	FUNCTIONS IN: molecular_function unknown; INVOLVED IN: biological_process unknown; LOCATED IN: integral to membrane; EXPRESSED IN: 23 plant structures; EXPRESSED DURING: 15 growth stages; CONTAINS InterPro DOMAIN/s: TRAM, LAG1 and CLN8 homology (InterPro:IPR006634); Has 127 Blast hits to 127 proteins in 26 species: Archae - 0; Bacteria - 0; Metazoa - 84; Fungi - 0; Plants - 41; Viruses - 0; Other…
259938_at	AT1G71310	1.72683	0.007788	unknown protein
258778_s_at	AT3G11890;AT3G11860	1.72683	0.005922	[AT3G11890, FUNCTIONS IN: molecular_function unknown; INVOLVED IN: biological_process unknown; LOCATED IN: cellular_component unknown; CONTAINS InterPro DOMAIN/s: Sterile alpha motif SAM (InterPro:IPR001660), Sterile alpha motif homology (InterPro:IPR010993), Sterile alpha motif homology 2 (InterPro:IPR011510); BEST Arabidopsis thaliana protein match is: unknown protein (TAIR:AT3G11860.1); Has 78…
249475_at	AT5G38890	1.72247	0.005307	exoribonuclease-related
254818_at	AT4G12470	1.72247	0.010705	protease inhibitor/seed storage/lipid transfer protein (LTP) family protein
253473_at	AT4G32250	1.72247	0.000959	protein kinase family protein
253257_at	AT4G34390	1.72247	0.012309	XLG2 (extra-large GTP-binding protein 2); guanyl nucleotide binding / signal transducer
248289_at	AT5G52880	1.72247	0.002334	F-box family protein
247104_at	AT5G66620	1.71809	0.00623	DAR6 (DA1-RELATED PROTEIN 6); zinc ion binding
245722_at	AT1G73430	1.71809	0.003167	sec34-like family protein
252355_at	AT3G48250	1.71809	0.000465	pentatricopeptide (PPR) repeat-containing protein
250350_at	AT5G12010	1.71809	0.004452	unknown protein
255874_at	AT2G40550	1.71809	0.003206	ETG1 (E2F TARGET GENE 1)
248556_at	AT5G50350	1.71809	0.000106	unknown protein
258000_at	AT3G28940	1.7137	0.008631	avirulence-responsive protein, putative / avirulence induced gene (AIG) protein, putative
248037_at	AT5G55930	1.7137	0.004505	OPT1 (OLIGOPEPTIDE TRANSPORTER 1); oligopeptide transporter
258527_at	AT3G06850	1.70929	0.004875	BCE2; acetyltransferase/ alpha-ketoacid dehydrogenase/ dihydrolipoamide branched chain acyltransferase
254357_at	AT4G22220	1.70929	0.005822	ISU1; structural molecule
253719_at	AT4G29490	1.70929	0.004607	aminopeptidase/ manganese ion binding
258809_at	AT3G04070	1.70487	0.000664	anac047 (Arabidopsis NAC domain containing protein 47); transcription factor
245421_at	AT4G17430	1.70487	0.004531	unknown protein
253789_at	AT4G28570	1.70487	0.001185	alcohol oxidase-related
262497_at	AT1G21720	1.70487	0.010133	PBC1 (PROTEASOME BETA SUBUNIT C1); peptidase/ threonine-type endopeptidase
266227_at	AT2G28870	1.70487	6.4e-05	unknown protein
251818_at	AT3G54860	1.70044	2.8e-05	vacuolar protein sorting protein, putative
245420_at	AT4G17410	1.70044	9.4e-05	zinc ion binding
260314_at	AT1G63830	1.70044	7e-05	proline-rich family protein
264236_at	AT1G54680	1.70044	0.006074	unknown protein
262710_at	AT1G16210	1.70044	0.000866	unknown protein
259234_at	AT3G11620	1.69599	0.003252	unknown protein
258926_s_at	AT3G10490;AT3G10480	1.69599	0.001186	[AT3G10490, anac052 (Arabidopsis NAC domain containing protein 52); transcription factor];[AT3G10480, no apical meristem (NAM) family protein]
248940_at	AT5G45400	1.69599	0.000836	replication protein, putative
250937_at	AT5G03230	1.69599	0.002365	unknown protein
258138_at	AT3G24495	1.69153	0.010096	MSH7 (MUTS HOMOLOG 7); ATP binding / damaged DNA binding / mismatched DNA binding
264326_at	AT1G04230	1.68706	0.000337	unknown protein
257893_at	AT3G17000	1.68257	0.00044	UBC32 (ubiquitin-conjugating enzyme 32); ubiquitin-protein ligase
261662_at	AT1G18350	1.68257	0.002927	ATMKK7; MAP kinase kinase/ kinase
258485_at	AT3G02630	1.68257	0.007618	acyl-(acyl-carrier-protein) desaturase, putative / stearoyl-ACP desaturase, putative
251663_at	AT3G57070	1.67807	0.000162	glutaredoxin family protein
245989_s_at	AT5G20620	1.67807	0.000604	UBQ4; protein binding
262842_at	AT1G14720	1.67807	0.001858	XTR2 (XYLOGLUCAN ENDOTRANSGLYCOSYLASE RELATED 2); hydrolase, acting on glycosyl bonds / xyloglucan:xyloglucosyl transferase
266464_at	AT2G47800	1.67807	0.000986	ATMRP4 (ARABIDOPSIS THALIANA MULTIDRUG RESISTANCE-ASSOCIATED PROTEIN 4); ATPase, coupled to transmembrane movement of substances / folic acid transporter
259120_at	AT3G02240	1.67356	0.006435	unknown protein
259873_s_at	AT1G76720;AT1G76820	1.67356	0.001465	[AT1G76720, GTP binding / GTPase/ translation initiation factor];[AT1G76820, GTP binding / GTPase]
255092_s_at	AT3G45370;AT4G09400;AT2G14340;AT3G33230	1.67356	0.000152	[AT3G45370, transposable element gene];[AT4G09400, transposable element gene];[AT2G14340, transposable element gene];[AT3G33230, transposable element gene]
255344_s_at	AT4G04570;AT4G04540	1.67356	0.000927	[AT4G04570, protein kinase family protein];[AT4G04540, protein kinase family protein]
250289_at	AT5G13190	1.66903	0.007702	INVOLVED IN: biological_process unknown; LOCATED IN: cellular_component unknown; EXPRESSED IN: 24 plant structures; EXPRESSED DURING: 15 growth stages; CONTAINS InterPro DOMAIN/s: LPS-induced tumor necrosis factor alpha factor (InterPro:IPR006629); Has 21 Blast hits to 21 proteins in 10 species: Archae - 0; Bacteria - 0; Metazoa - 2; Fungi - 0; Plants - 19; Viruses - 0; Other Eukaryotes - 0 (sour…
245360_at	AT4G16330	1.66903	0.0092	oxidoreductase/ oxidoreductase, acting on paired donors, with incorporation or reduction of molecular oxygen, 2-oxoglutarate as one donor, and incorporation of one atom each of oxygen into both donors
259628_at	no_match	1.66448	0.005194	no_match
261426_at	AT1G18680	1.66448	0.008766	HNH endonuclease domain-containing protein
259186_at	AT3G01590	1.66448	0.004389	aldose 1-epimerase family protein
254321_at	AT4G22590;AT4G22592	1.66448	0.000639	[AT4G22590, trehalose-6-phosphate phosphatase, putative];[AT4G22592, CPuORF27 (Conserved peptide upstream open reading frame 27)]
246219_at	AT4G36760	1.66448	0.002251	ATAPP1; N-1-naphthylphthalamic acid binding / aminopeptidase
251030_at	AT5G02130	1.66448	0.000586	NDP1 (RANDOM POTATO CDNA CLONE); binding
264352_at	AT1G03270	1.65992	0.012143	FUNCTIONS IN: molecular_function unknown; INVOLVED IN: biological_process unknown; LOCATED IN: endomembrane system; EXPRESSED IN: 21 plant structures; EXPRESSED DURING: 14 growth stages; CONTAINS InterPro DOMAIN/s: Protein of unknown function DUF21 (InterPro:IPR002550), Cystathionine beta-synthase, core (InterPro:IPR000644); BEST Arabidopsis thaliana protein match is: unknown protein (TAIR:AT4G14…
263421_at	AT2G17230	1.65992	0.011242	EXL5 (EXORDIUM LIKE 5)
249746_at	AT5G24590	1.65535	0.012959	TIP (TCV-INTERACTING PROTEIN); transcription coactivator/ transcription factor
263658_at	AT1G04490	1.65535	0.00936	unknown protein
255714_at	AT4G00300	1.65535	0.002286	fringe-related protein
261435_at	AT1G07615	1.65535	0.002782	GTP binding
246413_at	AT1G77310	1.65535	0.011521	FUNCTIONS IN: molecular_function unknown; INVOLVED IN: response to wounding; LOCATED IN: cellular_component unknown; EXPRESSED IN: 19 plant structures; EXPRESSED DURING: 10 growth stages; BEST Arabidopsis thaliana protein match is: wound-responsive family protein (TAIR:AT1G21610.1); Has 304 Blast hits to 291 proteins in 83 species: Archae - 0; Bacteria - 40; Metazoa - 149; Fungi - 37; Plants - 26…
257145_at	AT3G27320	1.65076	0.004665	hydrolase
245042_at	AT2G26540	1.65076	0.000671	HEMD; uroporphyrinogen-III synthase
267483_at	AT2G02810	1.65076	0.008041	UTR1 (UDP-GALACTOSE TRANSPORTER 1); UDP-galactose transmembrane transporter/ UDP-glucose transmembrane transporter/ pyrimidine nucleotide sugar transmembrane transporter
266064_at	AT2G18780	1.65076	0.009742	F-box family protein
247612_at	AT5G60730	1.65076	0.001102	anion-transporting ATPase family protein
246317_at	AT3G56900	1.65076	0.003603	aladin-related / adracalin-related
245200_at	AT1G67850	1.64616	0.008799	unknown protein
267018_at	AT2G39140	1.64616	0.0088	SVR1 (SUPPRESSOR OF VARIEGATION 1); RNA binding / pseudouridine synthase
256084_at	AT1G20750	1.64616	0.004502	helicase-related
255510_at	AT4G02020	1.64155	0.007067	SWN (SWINGER); transcription factor
253975_at	AT4G26600	1.64155	0.010942	nucleolar protein, putative
264944_at	AT1G76940	1.64155	0.00213	RNA recognition motif (RRM)-containing protein
255010_at	AT4G10050	1.64155	0.004573	hydrolase, alpha/beta fold family protein
257680_at	AT3G20330	1.63691	0.003375	aspartate carabmoyltransferase, chloroplast / aspartate transcarbamylase / ATCase (PYRB)
248341_at	AT5G52220	1.63691	0.000734	FUNCTIONS IN: molecular_function unknown; INVOLVED IN: biological_process unknown; LOCATED IN: cellular_component unknown; EXPRESSED IN: 18 plant structures; EXPRESSED DURING: 13 growth stages; CONTAINS InterPro DOMAIN/s: Chromosome transmission fidelity protein 8 (InterPro:IPR018607); Has 85 Blast hits to 85 proteins in 45 species: Archae - 0; Bacteria - 0; Metazoa - 54; Fungi - 13; Plants - 11;…
266519_at	AT2G35155	1.63691	0.003627	catalytic
264123_at	AT1G02270	1.63691	0.002154	endonuclease/exonuclease/phosphatase family protein / calcium-binding EF hand family protein
262098_at	AT1G56170	1.63691	0.006075	NF-YC2 (NUCLEAR FACTOR Y, SUBUNIT C2); DNA binding / transcription activator/ transcription factor
256441_at	AT3G10940	1.63227	0.003066	protein phosphatase-related
255743_at	AT1G25375	1.63227	0.003372	metallo-beta-lactamase family protein
249525_at	AT5G38650	1.63227	0.000291	proteasome maturation factor UMP1 family protein
255879_at	AT1G67000	1.62761	0.004497	ATP binding / kinase/ protein kinase/ protein serine/threonine kinase
262107_at	AT1G02750	1.62761	0.002727	zinc ion binding
255770_at	AT1G18560	1.62761	0.002527	DNA binding / protein dimerization
248833_at	AT5G47120	1.62761	0.002125	ATBI1 (BAX INHIBITOR 1)
255412_at	AT4G02980	1.62293	0.009292	ABP1 (ENDOPLASMIC RETICULUM AUXIN BINDING PROTEIN 1); auxin binding
259884_at	AT1G76390	1.62293	0.011605	armadillo/beta-catenin repeat family protein / U-box domain-containing protein
258238_at	AT3G27670	1.62293	0.009871	RST1 (RESURRECTION1); binding
256962_at	AT3G13560	1.62293	0.003454	glycosyl hydrolase family 17 protein
258869_at	AT3G03090	1.61824	0.0053	AtVGT1 (Arabidopsis thaliana vacuolar glucose transporter 1); carbohydrate transmembrane transporter/ fructose transmembrane transporter/ glucose transmembrane transporter/ sugar:hydrogen symporter
258337_at	AT3G16040	1.61824	0.013131	FUNCTIONS IN: molecular_function unknown; INVOLVED IN: biological_process unknown; LOCATED IN: cellular_component unknown; EXPRESSED IN: 9 plant structures; EXPRESSED DURING: L mature pollen stage, M germinated pollen stage, 4 anthesis, C globular stage, petal differentiation and expansion stage; CONTAINS InterPro DOMAIN/s: Translation machinery associated TMA7 (InterPro:IPR015157); BEST Arabidop…
254190_at	AT4G23885	1.61824	0.000895	unknown protein
257426_at	AT1G54850	1.61824	0.004773	FUNCTIONS IN: molecular_function unknown; INVOLVED IN: biological_process unknown; LOCATED IN: nucleolus; EXPRESSED IN: 22 plant structures; EXPRESSED DURING: 13 growth stages; CONTAINS InterPro DOMAIN/s: Heat shock protein Hsp20 (InterPro:IPR002068), HSP20-like chaperone (InterPro:IPR008978); BEST Arabidopsis thaliana protein match is: unknown protein (TAIR:AT1G54840.1); Has 35 Blast hits to 35 …
249276_at	AT5G41880	1.61824	0.002591	POLA3; DNA primase
251472_at	AT3G59580	1.61824	0.006129	RWP-RK domain-containing protein
255821_at	AT2G40570	1.61353	0.00491	initiator tRNA phosphoribosyl transferase family protein
245684_at	AT5G22000	1.61353	0.000354	RHF2A (RING-H2 GROUP F2A); protein binding / zinc ion binding
266021_at	AT2G05910	1.61353	0.000641	unknown protein
247740_at	AT5G58940	1.61353	0.000347	CRCK1 (CALMODULIN-BINDING RECEPTOR-LIKE CYTOPLASMIC KINASE 1); ATP binding / kinase/ protein kinase/ protein serine/threonine kinase
264013_at	AT2G21070	1.61353	0.00142	FIO1 (FIONA1); methyltransferase
248597_at	AT5G49160	1.60881	0.005883	MET1 (METHYLTRANSFERASE 1); methyltransferase
259113_at	AT3G05510	1.60881	0.005672	phospholipid/glycerol acyltransferase family protein
250490_at	AT5G09760	1.60881	0.006799	pectinesterase family protein
246870_at	AT5G26030	1.60881	0.004339	FC1 (ferrochelatase 1); ferrochelatase
254039_at	AT4G25840	1.60881	0.003798	GPP1 (glycerol-3-phosphatase 1); catalytic/ hydrolase
254508_at	AT4G20170	1.60881	0.003247	unknown protein
265930_at	AT2G18510	1.60881	0.000271	emb2444 (embryo defective 2444); RNA binding / nucleic acid binding / nucleotide binding
246993_at	AT5G67450	1.60407	0.011131	AZF1 (ARABIDOPSIS ZINC-FINGER PROTEIN 1); DNA binding / nucleic acid binding / transcription factor/ transcription repressor/ zinc ion binding
256545_at	AT3G14800	1.60407	0.000888	transposable element gene
257474_at	AT1G80850	1.60407	0.003843	methyladenine glycosylase family protein
253210_at	AT4G34840	1.60407	0.005896	ATMTN2; methylthioadenosine nucleosidase
248462_at	AT5G50960	1.60407	0.00393	NBP35 (NUCLEOTIDE BINDING PROTEIN 35); iron-sulfur cluster binding / nucleotide binding / protein homodimerization
258463_at	AT3G17410	1.59932	0.000195	serine/threonine protein kinase, putative
250830_at	AT5G04910	1.59455	5.4e-05	unknown protein
255827_at	AT2G40600	1.59455	0.001804	appr-1-p processing enzyme family protein
259868_at	AT1G76760	1.59455	0.010524	ATY1 (ARABIDOPSIS THIOREDOXIN Y1); electron carrier/ protein disulfide oxidoreductase
257199_at	AT3G23710	1.59455	0.006556	chloroplast inner membrane import protein Tic22, putative
255918_at	AT5G28570	1.58976	0.002824	transposable element gene
249107_at	AT5G43680	1.58496	0.005128	unknown protein
260396_at	AT1G69720	1.58496	0.000601	ho3 (HEME OXYGENASE 3); heme oxygenase (decyclizing)
250811_at	AT5G05110	1.58496	0.007327	cysteine protease inhibitor, putative / cystatin, putative
245474_at	AT4G16060	1.58496	0.007503	unknown protein
248785_at	AT5G47400	1.58496	0.000445	unknown protein
251447_at	AT3G59810	1.58015	0.006491	small nuclear ribonucleoprotein F, putative / U6 snRNA-associated Sm-like protein, putative / Sm protein F, putative
263954_at	AT2G35840	1.58015	0.006437	sucrose-phosphatase 1 (SPP1)
252376_at	AT3G47930	1.58015	0.000308	ATGLDH (L-GALACTONO-1,4-LACTONE DEHYDOROGENASE); L-gulono-1,4-lactone dehydrogenase/ galactonolactone dehydrogenase
260973_at	AT1G53490	1.58015	0.010765	DNA binding
254261_at	AT4G23460	1.58015	0.00143	beta-adaptin, putative
266867_at	AT2G45770	1.57531	0.006578	CPFTSY; 7S RNA binding / GTP binding / nucleoside-triphosphatase/ nucleotide binding
251915_at	AT3G53940	1.57531	0.000918	mitochondrial substrate carrier family protein
260964_at	AT1G45050	1.57531	0.005471	ATUBC2-1; ubiquitin-protein ligase
257066_at	AT3G18280	1.57531	0.003896	protease inhibitor/seed storage/lipid transfer protein (LTP) family protein
263653_at	AT1G04310	1.57046	0.000138	ERS2 (ETHYLENE RESPONSE SENSOR 2); ethylene binding / glycogen synthase kinase 3/ protein histidine kinase/ receptor
263999_at	AT2G22370	1.57046	0.012135	unknown protein
263978_at	AT2G42680	1.57046	0.000538	MBF1A (MULTIPROTEIN BRIDGING FACTOR 1A); DNA binding / transcription coactivator
260945_at	AT1G05950	1.57046	0.005966	unknown protein
266547_at	AT2G35320	1.5656	0.000417	ATEYA (Arabidopsis thaliana EYES ABSENT homolog); protein tyrosine phosphatase, metal-dependent
247390_at	AT5G63520	1.5656	5e-05	FUNCTIONS IN: molecular_function unknown; INVOLVED IN: biological_process unknown; LOCATED IN: cellular_component unknown; EXPRESSED IN: 23 plant structures; EXPRESSED DURING: 13 growth stages; CONTAINS InterPro DOMAIN/s: Cyclin-like F-box (InterPro:IPR001810), FIST domain, N-terminal (InterPro:IPR013702); Has 96 Blast hits to 96 proteins in 46 species: Archae - 0; Bacteria - 72; Metazoa - 6; Fun…
247028_at	AT5G67100	1.5656	0.011458	ICU2 (INCURVATA2); DNA-directed DNA polymerase
259757_at	AT1G77510	1.5656	0.005542	ATPDIL1-2 (PDI-LIKE 1-2); protein disulfide isomerase
266668_at	AT2G29760	1.5656	0.008843	pentatricopeptide (PPR) repeat-containing protein
255081_at	AT4G09140	1.56071	0.002857	MLH1 (MUTL-HOMOLOGUE 1); protein binding, bridging
265086_at	AT1G03770	1.56071	0.001175	RING1B (RING 1B); protein binding / zinc ion binding
264819_at	AT1G03510	1.55582	0.002721	pentatricopeptide (PPR) repeat-containing protein
260025_at	AT1G30070	1.55582	0.002069	SGS domain-containing protein
257728_at	AT3G18295	1.55582	0.011338	unknown protein
260220_at	AT1G74650	1.5509	0.011505	MYB31 (MYB DOMAIN PROTEIN 31); DNA binding / transcription factor
255590_at	AT4G01610	1.5509	0.004206	cathepsin B-like cysteine protease, putative
256268_at	AT3G12280	1.5509	0.009544	RBR1 (RETINOBLASTOMA-RELATED 1); transcription factor binding
266323_at	AT2G46700	1.5509	0.000193	calcium-dependent protein kinase, putative / CDPK, putative
251387_at	AT3G60810	1.54597	0.000491	unknown protein
246682_at	AT5G33290	1.54597	0.001053	XGD1 (XYLOGALACTURONAN DEFICIENT 1); UDP-xylosyltransferase/ catalytic
258273_at	AT3G15660	1.54597	0.001196	GRX4 (GLUTAREDOXIN 4); metal ion binding
247624_at	AT5G60160	1.54102	0.000271	aspartyl aminopeptidase, putative
266449_at	AT2G43080	1.54102	0.000535	AT-P4H-1 (A. THALIANA P4H ISOFORM 1); oxidoreductase, acting on paired donors, with incorporation or reduction of molecular oxygen, 2-oxoglutarate as one donor, and incorporation of one atom each of oxygen into both donors / procollagen-proline 4-dioxygen
252542_at	AT3G45770	1.54102	0.001118	oxidoreductase, zinc-binding dehydrogenase family protein
260042_at	AT1G68820	1.53605	0.007454	membrane protein, putative
255544_at	AT4G01880	1.53605	0.002936	methyltransferase
266914_at	AT2G45880	1.53605	0.00736	BAM7 (BETA-AMYLASE 7); beta-amylase/ catalytic/ cation binding
256356_s_at	AT5G43620;AT1G66500	1.53605	0.012411	[AT5G43620, S-locus protein-related];[AT1G66500, zinc finger (C2H2-type) family protein]
260667_at	AT1G19440	1.53605	0.002537	KCS4 (3-KETOACYL-COA SYNTHASE 4); acyltransferase/ catalytic/ transferase, transferring acyl groups other than amino-acyl groups
263804_at	AT2G40270	1.53605	0.002346	protein kinase family protein
266748_at	no_match	1.53107	0.011395	no_match
251173_at	AT3G63270	1.53107	0.001495	unknown protein
258123_at	AT3G18040	1.53107	0.001584	MPK9 (MAP KINASE 9); MAP kinase
246905_at	AT5G25570	1.53107	0.005833	unknown protein
252278_at	AT3G49530	1.53107	0.006999	anac062 (Arabidopsis NAC domain containing protein 62); transcription factor
261820_at	AT1G11420	1.53107	0.004514	agenet domain-containing protein
262755_at	AT1G16360	1.52607	0.003254	LEM3 (ligand-effect modulator 3) family protein / CDC50 family protein
255630_at	AT4G00700	1.52105	0.00658	C2 domain-containing protein
256451_s_at	AT5G04781;AT1G75170	1.51602	0.007331	[AT5G04781, Pseudogene of AT1G75170; SEC14 cytosolic factor family protein / phosphoglyceride transfer family protein];[AT1G75170, SEC14 cytosolic factor family protein / phosphoglyceride transfer family protein]
249125_at	AT5G43450	1.51602	0.005889	2-oxoglutarate-dependent dioxygenase, putative
251386_at	AT3G60800	1.51602	0.002281	zinc finger (DHHC type) family protein
267605_at	AT2G32920	1.51602	0.003558	ATPDIL2-3 (PDI-LIKE 2-3); protein disulfide isomerase
259037_at	AT3G09350	1.51602	0.000186	armadillo/beta-catenin repeat family protein
250245_at	AT5G13690	1.51602	0.002789	alpha-N-acetylglucosaminidase family / NAGLU family
245569_at	AT4G14660	1.51602	0.006239	NRPE7; DNA-directed RNA polymerase
248615_at	AT5G49570	1.51096	0.004372	AtPNG1 (Arabidopsis thaliana peptide-N-glycanase 1); catalytic/ peptide-N4-(N-acetyl-beta-glucosaminyl)asparagine amidase
248554_at	AT5G50330	1.51096	0.004095	ATP binding / protein kinase
266653_at	AT2G25740	1.51096	0.001483	ATP-dependent protease La (LON) domain-containing protein
245276_at	AT4G16780	1.51096	0.000245	ATHB-2 (ARABIDOPSIS THALIANA HOMEOBOX PROTEIN 2); DNA binding / protein homodimerization/ sequence-specific DNA binding / transcription factor
265448_at	AT2G46590	1.51096	0.007665	DAG2 (DOF AFFECTING GERMINATION 2); DNA binding / transcription factor
265087_at	no_match	1.50589	0.000492	no_match
248753_at	AT5G47630	1.50589	0.00905	mtACP3 (mitochondrial acyl carrier protein 3); acyl carrier/ cofactor binding
260054_at	AT1G78130	1.50589	0.001288	UNE2 (unfertilized embryo sac 2); carbohydrate transmembrane transporter/ sugar:hydrogen symporter
262372_at	AT1G73130	1.50589	1.4e-05	unknown protein
255872_at	AT2G30360	1.50589	0.004506	SIP4 (SOS3-INTERACTING PROTEIN 4); kinase/ protein kinase
266900_at	AT2G34610	1.50589	0.011643	unknown protein
246015_at	AT5G10700	1.5008	0.004734	aminoacyl-tRNA hydrolase/ protein tyrosine phosphatase
249322_at	AT5G40930	1.5008	0.008083	TOM20-4 (TRANSLOCASE OF OUTER MEMBRANE 20-4); P-P-bond-hydrolysis-driven protein transmembrane transporter
262641_at	AT1G62730	1.5008	0.00348	transferase
262067_at	AT1G80060	1.5008	0.001379	FUNCTIONS IN: molecular_function unknown; INVOLVED IN: protein modification process; LOCATED IN: cellular_component unknown; EXPRESSED IN: 17 plant structures; EXPRESSED DURING: 7 growth stages; CONTAINS InterPro DOMAIN/s: Ubiquitin (InterPro:IPR000626); BEST Arabidopsis thaliana protein match is: unknown protein (TAIR:AT4G32270.1); Has 97 Blast hits to 97 proteins in 32 species: Archae - 0; Bact…
258842_at	AT3G04680	1.5008	0.000304	CLPS3 (CLP-SIMILAR PROTEIN 3); binding
260533_at	no_match	1.4957	0.001918	no_match
260384_at	AT1G74040	1.4957	0.005078	IMS1 (2-ISOPROPYLMALATE SYNTHASE 1); 2-isopropylmalate synthase
252996_s_at	AT4G38460	1.4957	0.000582	GGR (geranylgeranyl reductase); farnesyltranstransferase
259250_at	AT3G07580	1.4957	0.010511	unknown protein
263596_at	AT2G01900	1.4957	0.005593	endonuclease/exonuclease/phosphatase family protein
264024_at	AT2G21180	1.4957	0.001327	unknown protein
259030_at	AT3G09310	1.4957	0.009977	unknown protein
245863_s_at	AT1G58060;AT1G58050	1.49057	2.7e-05	[AT1G58060, helicase domain-containing protein];[AT1G58050, helicase domain-containing protein]
253377_at	AT4G33300	1.49057	0.00452	ADR1-L1 (ADR1-like 1); ATP binding / protein binding
263757_at	AT2G21430	1.49057	1e-06	cysteine proteinase A494, putative / thiol protease, putative
259681_at	AT1G77760	1.49057	0.000763	NIA1 (NITRATE REDUCTASE 1); nitrate reductase
254335_at	AT4G22260	1.48543	0.000851	IM (IMMUTANS); alternative oxidase
255065_s_at	AT4G08870;AT4G08900	1.48543	0.008452	[AT4G08870, arginase, putative];[AT4G08900, arginase]
251623_at	AT3G57390	1.48543	0.012859	AGL18; transcription factor
247250_at	AT5G64630	1.48543	0.001126	FAS2 (FASCIATA 2); nucleotide binding / protein binding
263956_at	AT2G35940	1.48543	0.008043	BLH1 (BEL1-LIKE HOMEODOMAIN 1); DNA binding / protein heterodimerization/ protein homodimerization/ transcription factor
261774_at	AT1G76260	1.48543	0.002869	transducin family protein / WD-40 repeat family protein
247795_at	AT5G58620	1.48027	0.002408	zinc finger (CCCH-type) family protein
259339_at	AT3G03900	1.48027	0.005674	adenylylsulfate kinase, putative
266137_at	AT2G45010	1.48027	0.002288	unknown protein
257657_at	AT3G13235	1.47508	0.00161	ubiquitin family protein
259690_at	AT1G63160	1.47508	0.002927	replication factor C 40 kDa, putative
262180_at	AT1G78050	1.47508	0.005679	PGM (PHOSPHOGLYCERATE/BISPHOSPHOGLYCERATE MUTASE); catalytic/ intramolecular transferase, phosphotransferases
248279_at	AT5G52910	1.47508	0.01041	ATIM (TIMELESS)
245430_at	AT4G17060	1.47508	0.000691	unknown protein
253704_at	AT4G29490	1.47508	0.000402	aminopeptidase/ manganese ion binding
256424_at	AT1G33490	1.47508	0.003524	unknown protein
257962_at	AT3G19790	1.47508	0.012901	unknown protein
245098_at	AT2G40940	1.47508	0.001432	ERS1 (ETHYLENE RESPONSE SENSOR 1); ethylene binding / protein histidine kinase/ receptor
264865_at	AT1G24120	1.46989	0.003041	ARL1 (ARG1-LIKE 1); heat shock protein binding / unfolded protein binding
262384_at	AT1G72950	1.46989	0.013077	disease resistance protein (TIR-NBS class), putative
256209_at	AT1G50940	1.46989	0.004665	ETFALPHA (electron transfer flavoprotein alpha); FAD binding / electron carrier
259817_at	AT1G49880	1.46989	0.011363	Erv1/Alr family protein
250148_at	AT5G14530	1.46989	0.00757	transducin family protein / WD-40 repeat family protein
263130_at	AT1G78650	1.46467	0.007105	POLD3; DNA-directed DNA polymerase
261843_at	AT1G16180	1.46467	0.000326	TMS membrane family protein / tumour differentially expressed (TDE) family protein
266657_at	AT2G25910	1.46467	0.00028	3'-5' exonuclease domain-containing protein / K homology domain-containing protein / KH domain-containing protein
248059_at	AT5G55540	1.46467	0.001479	TRN1 (TORNADO 1)
256803_at	AT3G20960	1.46467	0.012328	CYP705A33; electron carrier/ heme binding / iron ion binding / monooxygenase/ oxygen binding
247092_at	AT5G66380	1.45943	0.00138	ATFOLT1 (ARABIDOPSIS THALIANA FOLATE TRANSPORTER 1); binding / folic acid transporter
267374_at	AT2G26230	1.45943	0.003422	uricase / urate oxidase / nodulin 35, putative
250998_at	AT5G02620	1.45943	0.008185	ankyrin repeat family protein
249816_at	AT5G23880	1.45943	1e-05	CPSF100 (CLEAVAGE AND POLYADENYLATION SPECIFICITY FACTOR 100); DNA binding / protein binding
262586_at	AT1G15480	1.45418	0.006475	DNA binding
254284_at	AT4G22910	1.45418	0.000396	FZR2 (FIZZY-RELATED 2); signal transducer
256490_at	AT1G31460	1.45418	0.002923	unknown protein
247806_at	AT5G58270	1.45418	0.000171	STA1 (STARIK 1); ATPase, coupled to transmembrane movement of substances / transporter
264458_at	AT1G10410	1.45418	0.002071	INVOLVED IN: N-terminal protein myristoylation; LOCATED IN: chloroplast; EXPRESSED IN: 24 plant structures; EXPRESSED DURING: 15 growth stages; CONTAINS InterPro DOMAIN/s: Protein of unknown function DUF1336 (InterPro:IPR009769); BEST Arabidopsis thaliana protein match is: CW14 (TAIR:AT1G59650.1); Has 144 Blast hits to 144 proteins in 21 species: Archae - 0; Bacteria - 0; Metazoa - 9; Fungi - 2; …
249128_at	AT5G43440	1.45418	0.005235	2-oxoglutarate-dependent dioxygenase, putative
258391_at	AT3G15420	1.45418	0.000252	unknown protein
266690_at	AT2G19900	1.4489	0.012336	ATNADP-ME1 (NADP-malic enzyme 1); malate dehydrogenase (oxaloacetate-decarboxylating) (NADP+)/ malic enzyme/ oxidoreductase, acting on NADH or NADPH, NAD or NADP as acceptor
257232_at	AT3G16500	1.4489	0.011514	PAP1 (PHYTOCHROME-ASSOCIATED PROTEIN 1); transcription factor
248632_at	AT5G49010	1.4489	0.010058	SLD5 (SYNTHETIC LETHALITY WITH DPB11-1 5)
247228_at	AT5G65140	1.4489	0.001991	trehalose-6-phosphate phosphatase, putative
254393_at	AT4G21580	1.44361	0.001496	oxidoreductase, zinc-binding dehydrogenase family protein
250609_at	AT5G07470	1.44361	0.000798	PMSR3 (PEPTIDEMETHIONINE SULFOXIDE REDUCTASE 3); oxidoreductase, acting on sulfur group of donors, disulfide as acceptor / peptide-methionine-(S)-S-oxide reductase
253777_at	AT4G28450	1.44361	0.001397	nucleotide binding / protein binding
246989_at	AT5G67350	1.44361	0.013082	unknown protein
260295_at	AT1G63770	1.44361	0.000254	peptidase M1 family protein
248610_at	AT5G49500	1.44361	0.004236	signal recognition particle 54 kDa protein 2 / SRP54 (SRP-54B)
260616_at	AT1G53280	1.44361	5.6e-05	DJ-1 family protein
250393_at	AT5G10900	1.44361	0.008763	calcineurin-like phosphoesterase family protein
248134_at	AT5G54860	1.43829	0.012228	integral membrane transporter family protein
257208_at	AT3G14910	1.43829	0.00601	unknown protein
266873_at	AT2G44740	1.43829	0.005442	CYCP4;1 (cyclin p4;1); cyclin-dependent protein kinase
255116_at	AT4G08850	1.43829	0.000227	kinase
266757_at	AT2G46940	1.43296	0.008066	unknown protein
263426_at	AT2G31570	1.43296	0.009237	ATGPX2 (GLUTATHIONE PEROXIDASE 2); glutathione peroxidase
247940_at	AT5G57190	1.43296	0.008993	PSD2 (phosphatidylserine decarboxylase 2); phosphatidylserine decarboxylase
252024_at	AT3G52880	1.43296	0.000984	monodehydroascorbate reductase, putative
266738_at	AT2G47010	1.43296	0.011646	unknown protein
251640_at	AT3G57450	1.43296	0.006036	unknown protein
250477_at	AT5G10190	1.43296	0.000585	transporter-related
249839_at	AT5G23405	1.42761	0.003328	high mobility group (HMG1/2) family protein
259910_at	AT1G72700	1.42761	0.003711	haloacid dehalogenase-like hydrolase family protein
259137_at	AT3G10300	1.42761	0.006003	calcium-binding EF hand family protein
262055_at	AT1G79970	1.42223	0.000418	FUNCTIONS IN: molecular_function unknown; INVOLVED IN: biological_process unknown; LOCATED IN: chloroplast; EXPRESSED IN: 23 plant structures; EXPRESSED DURING: 13 growth stages; BEST Arabidopsis thaliana protein match is: senescence-associated protein-related (TAIR:AT2G25690.2); Has 74 Blast hits to 74 proteins in 7 species: Archae - 0; Bacteria - 0; Metazoa - 0; Fungi - 0; Plants - 74; Viruses …
248786_at	AT5G47410	1.42223	0.004952	unknown protein
265183_at	AT1G23750	1.42223	0.007114	DNA-binding protein-related
245572_at	AT4G14720	1.42223	0.003004	PPD2; dioxygenase/ metal ion binding
264758_at	AT1G61340	1.42223	0.010331	F-box family protein
266235_at	AT2G02360	1.42223	0.002434	AtPP2-B10 (Phloem protein 2-B10); carbohydrate binding
256150_at	AT1G55120	1.42223	0.005924	ATFRUCT5 (BETA-FRUCTOFURANOSIDASE 5); hydrolase, hydrolyzing O-glycosyl compounds / levanase
264747_at	no_match	1.42223	0.005698	no_match
250726_at	AT5G06410	1.42223	0.005468	DNAJ heat shock N-terminal domain-containing protein
245496_at	AT4G16440	1.41684	0.000347	ferredoxin hydrogenase
247699_at	AT5G59840	1.41684	0.000979	Ras-related GTP-binding family protein
262588_at	AT1G15130	1.41143	0.000793	hydroxyproline-rich glycoprotein family protein
247155_at	AT5G65750	1.41143	0.013128	2-oxoglutarate dehydrogenase E1 component, putative / oxoglutarate decarboxylase, putative / alpha-ketoglutaric dehydrogenase, putative
249354_at	AT5G40480	1.41143	0.001658	EMB3012 (embryo defective 3012)
266835_at	AT2G29990	1.41143	0.001916	NDA2 (ALTERNATIVE NAD(P)H DEHYDROGENASE 2); FAD binding / NADH dehydrogenase/ oxidoreductase
246631_at	AT1G50740	1.41143	0.001621	unknown protein
259219_at	AT3G03560	1.40599	0.004497	unknown protein
247173_at	AT5G65260	1.40599	4.8e-05	polyadenylate-binding protein family protein / PABP family protein
256866_at	AT3G26380	1.40599	0.002245	glycosyl hydrolase family protein 27 / alpha-galactosidase family protein / melibiase family protein
247993_at	AT5G56130	1.40599	1.7e-05	transducin family protein / WD-40 repeat family protein
256770_at	AT3G13710;AT3G13700	1.40599	0.008978	[AT3G13710, PRA1.F4 (PRENYLATED RAB ACCEPTOR 1.F4)];[AT3G13700, RNA-binding protein, putative]
253275_at	AT4G34215	1.40054	0.000546	hydrolase
258173_at	AT3G21630	1.40054	0.007175	CERK1 (CHITIN ELICITOR RECEPTOR KINASE 1); kinase/ receptor signaling protein/ transmembrane receptor protein kinase
267629_at	AT2G42120	1.40054	0.002247	POLD2 (DNA POLYMERASE DELTA SMALL SUBUNIT); DNA binding / DNA-directed DNA polymerase
259246_s_at	AT3G07730;AT4G01170	1.39506	0.00495	[AT3G07730, unknown protein];[AT4G01170, unknown protein]
267369_at	AT2G44420	1.39506	0.000737	protein N-terminal asparagine amidohydrolase family protein
258453_at	AT3G22320	1.39506	1.6e-05	NRPB5; DNA binding / DNA-directed RNA polymerase
251848_at	AT3G54620	1.39506	0.002378	BZIP25 (BASIC LEUCINE ZIPPER 25); protein heterodimerization/ transcription factor
255816_at	AT2G33470	1.39506	0.005635	GLTP1 (glycolipid transfer protein 1); glycolipid binding / glycolipid transporter
262926_s_at	AT1G65800;AT1G65790	1.39506	0.012962	[AT1G65800, ARK2 (A. THALIANA RECEPTOR KINASE 2); kinase/ protein kinase/ transmembrane receptor protein serine/threonine kinase];[AT1G65790, ARK1 (A. THALIANA RECEPTOR KINASE 1); kinase/ protein kinase/ protein serine/threonine kinase/ transmembrane receptor protein kinase]
252856_at	AT4G39690	1.39506	0.001469	unknown protein
247247_at	AT5G64650	1.39506	0.013142	ribosomal protein L17 family protein
245849_at	AT5G13520	1.39506	0.000333	peptidase M1 family protein
264560_at	AT1G55820	1.39506	0.00727	FUNCTIONS IN: molecular_function unknown; INVOLVED IN: biological_process unknown; LOCATED IN: cellular_component unknown; EXPRESSED IN: 8 plant structures; EXPRESSED DURING: F mature embryo stage, petal differentiation and expansion stage, D bilateral stage, E expanded cotyledon stage; CONTAINS InterPro DOMAIN/s: Protein of unknown function DUF1296 (InterPro:IPR009719); BEST Arabidopsis thaliana…
256480_at	AT1G33410	1.39506	0.010068	SAR1 (suppressor of auxin resistance1)
246724_at	AT5G29000	1.39506	0.00133	myb family transcription factor
264657_at	AT1G09100	1.38957	0.008016	RPT5B (26S proteasome AAA-ATPase subunit RPT5B); ATPase/ calmodulin binding
251484_at	AT3G59640	1.38957	0.007092	glycine-rich protein
245255_at	AT4G14110	1.38957	0.000885	COP9 (CONSTITUTIVE PHOTOMORPHOGENIC 9); metalloendopeptidase/ protein binding
254140_at	AT4G24610	1.38405	0.003169	unknown protein
259895_at	AT1G71440	1.38405	0.008377	PFI (PFIFFERLING)
246193_at	AT5G20880	1.38405	0.004397	transposable element gene
254275_at	AT4G22670	1.38405	0.003218	AtHip1 (Arabidopsis thaliana Hsp70-interacting protein 1); binding
251014_at	AT5G02520	1.38405	0.009086	FUNCTIONS IN: molecular_function unknown; INVOLVED IN: biological_process unknown; LOCATED IN: cellular_component unknown; EXPRESSED IN: 13 plant structures; EXPRESSED DURING: 6 growth stages; CONTAINS InterPro DOMAIN/s: SANT associated (InterPro:IPR015216); BEST Arabidopsis thaliana protein match is: EMB1674 (EMBRYO DEFECTIVE 1674) (TAIR:AT1G58210.1); Has 41 Blast hits to 40 proteins in 13 speci…
263152_at	AT1G54060	1.38405	0.013063	ASIL1 (ARABIDOPSIS 6B-INTERACTING PROTEIN 1-LIKE 1); sequence-specific DNA binding / transcription factor
249238_at	AT5G41970	1.37851	0.00081	FUNCTIONS IN: molecular_function unknown; INVOLVED IN: biological_process unknown; LOCATED IN: mitochondrion; EXPRESSED IN: 24 plant structures; EXPRESSED DURING: 13 growth stages; CONTAINS InterPro DOMAIN/s: Metal-dependent protein hydrolase (InterPro:IPR003226); BEST Arabidopsis thaliana protein match is: unknown protein (TAIR:AT3G49320.1); Has 464 Blast hits to 461 proteins in 209 species: Arc…
245127_at	AT2G47600	1.37851	0.002644	ATMHX (ARABIDOPSIS THALIANA MAGNESIUM/PROTON EXCHANGER); calcium:sodium antiporter/ cation:cation antiporter
267236_at	AT2G44100	1.37851	0.001157	ATGDI1 (ARABIDOPSIS THALIANA GUANOSINE NUCLEOTIDE DIPHOSPHATE DISSOCIATION INHIBITOR 1); RAB GDP-dissociation inhibitor
261189_at	AT1G33040	1.37851	0.01021	NACA5 (NASCENT POLYPEPTIDE-ASSOCIATED COMPLEX SUBUNIT ALPHA-LIKE PROTEIN 5)
265899_s_at	AT2G25700;AT1G20140	1.37851	0.013194	[AT2G25700, ASK3 (ARABIDOPSIS SKP1-LIKE 3); protein binding / ubiquitin-protein ligase];[AT1G20140, ASK4 (ARABIDOPSIS SKP1-LIKE 4); protein binding / ubiquitin-protein ligase]
247587_at	AT5G60620	1.37851	0.002618	phospholipid/glycerol acyltransferase family protein
264561_at	AT1G55810	1.37851	0.003462	uracil phosphoribosyltransferase, putative / UMP pyrophosphorylase, putative / UPRTase, putative
249251_at	AT5G42000	1.37851	0.00563	ORMDL family protein
250537_at	AT5G08565	1.37851	0.00556	positive transcription elongation factor/ zinc ion binding
258555_at	AT3G06860	1.37851	0.001052	MFP2 (MULTIFUNCTIONAL PROTEIN 2); 3-hydroxyacyl-CoA dehydrogenase/ enoyl-CoA hydratase
254595_at	AT4G18960	1.37851	0.012204	AG (AGAMOUS); DNA binding / transcription factor
265392_at	AT2G20860	1.37851	0.000169	LIP1 (LIPOIC ACID SYNTHASE 1); lipoic acid synthase
255794_at	AT2G33480	1.37295	0.004754	ANAC041 (Arabidopsis NAC domain containing protein 41); transcription factor
254654_at	AT4G18040	1.37295	0.013125	EIF4E (EUKARYOTIC TRANSLATION INITATION FACTOR 4E); RNA binding / RNA cap binding / protein binding / translation initiation factor
263643_at	AT2G04740	1.37295	0.000887	ankyrin repeat family protein
255667_at	AT4G00240	1.37295	0.003274	PLDBETA2; phospholipase D
259468_at	AT1G19080;AT3G55490	1.37295	0.000145	[AT1G19080, TTN10 (TITAN 10)];[AT3G55490, CONTAINS InterPro DOMAIN/s: GINS complex, Psf3 component (InterPro:IPR010492); BEST Arabidopsis thaliana protein match is: TTN10 (TITAN 10) (TAIR:AT1G19080.1); Has 224 Blast hits to 224 proteins in 105 species: Archae - 0; Bacteria - 0; Metazoa - 105; Fungi - 76; Plants - 22; Viruses - 0; Other Eukaryotes - 21 (source: NCBI BLink).]
257060_at	AT3G18230	1.37295	0.000873	octicosapeptide/Phox/Bem1p (PB1) domain-containing protein
249145_at	AT5G43280	1.37295	0.001765	ATDCI1 (DELTA(3,5),DELTA(2,4)-DIENOYL-COA ISOMERASE 1); delta3,5-delta2,4-dienoyl-CoA isomerase/ enoyl-CoA hydratase
256818_at	AT3G21420	1.37295	0.008663	oxidoreductase, 2OG-Fe(II) oxygenase family protein
251730_at	AT3G56330	1.36737	2.9e-05	N2,N2-dimethylguanosine tRNA methyltransferase family protein
256788_at	AT3G13730	1.36737	0.007149	CYP90D1; oxidoreductase, acting on paired donors, with incorporation or reduction of molecular oxygen, NADH or NADPH as one donor, and incorporation of one atom of oxygen / oxygen binding
264250_at	AT1G78680	1.36737	0.005135	ATGGH2 (gamma-glutamyl hydrolase 2); omega peptidase
265767_at	AT2G48110	1.36737	0.006129	REF4 (REDUCED EPIDERMAL FLUORESCENCE 4)
245897_at	AT5G09400	1.36737	0.000806	KUP7; potassium ion transmembrane transporter
248766_at	AT5G47580	1.36737	0.000905	unknown protein
257268_at	AT3G17450	1.36737	0.010155	hAT dimerisation domain-containing protein
261586_at	AT1G01640	1.36737	0.001356	speckle-type POZ protein-related
262440_at	AT1G47710	1.36737	0.002775	serpin, putative / serine protease inhibitor, putative
261269_at	AT1G26690	1.36177	0.000845	emp24/gp25L/p24 family protein
260444_at	AT1G68300	1.36177	0.005678	universal stress protein (USP) family protein
251927_at	AT3G53990	1.36177	0.00025	universal stress protein (USP) family protein
260986_at	AT1G53580	1.36177	0.001477	GLY3 (GLYOXALASE II 3); hydrolase/ hydroxyacylglutathione hydrolase
262644_at	AT1G62710	1.36177	0.004836	BETA-VPE (BETA VACUOLAR PROCESSING ENZYME); cysteine-type endopeptidase
258903_at	AT3G06410	1.36177	0.00539	nucleic acid binding / zinc ion binding
247858_at	AT5G58220	1.35614	0.010386	TTL (Transthyretin-Like protein); steroid binding
263813_s_at	AT2G10000;AT1G41910	1.35614	0.00434	[AT2G10000, transposable element gene];[AT1G41910, transposable element gene]
249984_at	AT5G18400	1.35614	0.004607	unknown protein
253373_at	AT4G33150	1.35614	0.013152	lysine-ketoglutarate reductase/saccharopine dehydrogenase bifunctional enzyme
259881_at	AT1G76820	1.35614	0.008798	GTP binding / GTPase
267017_at	AT2G39140	1.35614	0.005055	SVR1 (SUPPRESSOR OF VARIEGATION 1); RNA binding / pseudouridine synthase
260227_at	AT1G74450	1.35614	0.003778	unknown protein
253646_at	AT4G29810	1.35614	0.010987	ATMKK2 (ARABIDOPSIS THALIANA MAP KINASE KINASE 2); MAP kinase kinase/ kinase
249763_at	AT5G24010	1.3505	0.00365	protein kinase family protein
258164_at	AT3G17910	1.3505	0.011205	SURF1 (SURFEIT 1)
253331_at	AT4G33490	1.34483	0.006763	aspartic-type endopeptidase
265657_at	AT2G13840	1.34483	6.6e-05	PHP domain-containing protein
253381_at	AT4G33350	1.34483	0.008972	chloroplast inner membrane import protein Tic22, putative
262956_at	AT1G54270	1.34483	0.008271	EIF4A-2; ATP-dependent helicase/ translation initiation factor
265880_at	AT2G42300	1.34483	0.002456	basic helix-loop-helix (bHLH) family protein
257991_at	AT3G19870	1.34483	0.001985	binding
253114_at	AT4G35860	1.34483	0.000124	ATGB2 (GTP-BINDING 2); GTP binding
247863_at	AT5G57900	1.34483	0.006331	SKIP1 (SKP1 INTERACTING PARTNER 1); protein binding
251812_at	AT3G54970	1.34483	0.000279	catalytic
250078_at	AT5G16690	1.34483	0.007513	ORC3 (ORIGIN RECOGNITION COMPLEX SUBUNIT 3); protein binding
252587_at	AT3G45620	1.34483	0.008622	transducin family protein / WD-40 repeat family protein
262604_at	AT1G15060	1.34483	0.009122	LOCATED IN: chloroplast; EXPRESSED IN: 23 plant structures; EXPRESSED DURING: 14 growth stages; CONTAINS InterPro DOMAIN/s: Uncharacterised conserved protein UCP031088, alpha/beta hydrolase, At1g15070 (InterPro:IPR016969); BEST Arabidopsis thaliana protein match is: unknown protein (TAIR:AT1G73750.1); Has 120 Blast hits to 104 proteins in 29 species: Archae - 0; Bacteria - 61; Metazoa - 1; Fungi …
245581_at	AT4G14840	1.34483	0.001602	unknown protein
266874_at	AT2G44760	1.33914	0.001393	unknown protein
256795_at	AT3G22110	1.33914	0.001566	PAC1; endopeptidase/ peptidase/ threonine-type endopeptidase
245114_at	AT2G41630	1.33914	0.005976	TFIIB (TRANSCRIPTION FACTOR II B); RNA polymerase II transcription factor/ protein binding / transcription regulator/ translation initiation factor/ zinc ion binding
248366_at	AT5G52510	1.33914	0.003098	scarecrow-like transcription factor 8 (SCL8)
264378_at	AT2G25220	1.33914	0.012491	ATP binding / kinase/ protein kinase/ protein serine/threonine kinase/ protein tyrosine kinase
245987_at	AT5G13180	1.33914	0.00076	ANAC083 (ARABIDOPSIS NAC DOMAIN CONTAINING PROTEIN 83); transcription factor
253239_at	AT4G34500	1.33914	0.000883	protein kinase family protein
250975_at	AT5G03050	1.33342	0.002162	unknown protein
255967_at	AT1G22280	1.33342	0.003096	protein phosphatase 2C, putative / PP2C, putative
262962_at	AT1G54340	1.33342	0.002186	ICDH (ISOCITRATE DEHYDROGENASE); isocitrate dehydrogenase (NADP+)/ oxidoreductase, acting on the CH-OH group of donors, NAD or NADP as acceptor
253988_at	AT4G26310	1.33342	0.000555	elongation factor P (EF-P) family protein
261725_at	AT1G76300	1.32769	0.001752	SmD3 (snRNP core protein SmD3)
262319_s_at	AT1G27580;AT1G27540	1.32769	0.009565	[AT1G27580, F-box family protein];[AT1G27540, F-box family protein]
248440_at	AT5G51260	1.32769	0.000128	acid phosphatase, putative
265815_at	AT2G17975	1.32769	0.000478	zinc finger (Ran-binding) family protein
251153_at	AT3G63000	1.32769	0.0014	NPL41 (NPL4-LIKE PROTEIN 1)
249735_at	AT5G24450	1.32769	0.003236	unknown protein
262258_at	AT1G53850	1.32193	0.002663	PAE1; endopeptidase/ peptidase/ threonine-type endopeptidase
250768_at	AT5G05670	1.32193	0.000638	signal recognition particle binding
254372_at	AT4G21620	1.32193	0.006879	glycine-rich protein
263663_at	AT1G04410	1.32193	0.002394	malate dehydrogenase, cytosolic, putative
258045_at	AT3G21280	1.32193	0.003858	UBP7 (UBIQUITIN-SPECIFIC PROTEASE 7); ubiquitin thiolesterase/ ubiquitin-specific protease
252275_at	AT3G49600	1.32193	0.010114	UBP26 (UBIQUITIN-SPECIFIC PROTEASE 26); ubiquitin thiolesterase/ ubiquitin-specific protease
263001_at	AT1G54360	1.32193	4.9e-05	TAF6B4 (TBP-ASSOCIATED FACTOR 6B4); RNA polymerase II transcription factor/ transcription initiation factor
258848_at	AT3G03300;AT3G03305	1.31615	0.002064	[AT3G03300, DCL2 (DICER-LIKE 2); ATP binding / ATP-dependent helicase/ RNA binding / double-stranded RNA binding / helicase/ nucleic acid binding / ribonuclease III];[AT3G03305, calcineurin-like phosphoesterase family protein]
259675_at	AT1G77710	1.31615	0.004903	INVOLVED IN: biological_process unknown; LOCATED IN: cellular_component unknown; EXPRESSED IN: 24 plant structures; EXPRESSED DURING: 15 growth stages; CONTAINS InterPro DOMAIN/s: Ubiquitin-like, Ufm1 (InterPro:IPR005375); Has 170 Blast hits to 170 proteins in 79 species: Archae - 0; Bacteria - 0; Metazoa - 105; Fungi - 0; Plants - 27; Viruses - 0; Other Eukaryotes - 38 (source: NCBI BLink).
250906_at	AT5G03650	1.31615	0.013047	SBE2.2 (starch branching enzyme 2.2); 1,4-alpha-glucan branching enzyme
265100_at	AT1G31010	1.31615	0.000366	OSB4 (organellar single-stranded DNA binding protein 4); single-stranded DNA binding
245578_at	AT4G14790	1.31615	0.011198	ATSUV3; ATP-dependent RNA helicase
250332_at	AT5G11680	1.31034	0.000247	unknown protein
259205_at	AT3G09030	1.31034	0.00472	potassium channel tetramerisation domain-containing protein
253491_at	AT4G31770	1.31034	0.006307	calcineurin-like phosphoesterase family protein
258105_at	AT3G23605	1.31034	0.008007	UBX domain-containing protein
248879_at	AT5G46180	1.31034	0.005928	delta-OAT; ornithine-oxo-acid transaminase
245367_at	AT4G16265	1.31034	9.1e-05	NRPB9B; DNA binding / DNA-directed RNA polymerase/ nucleic acid binding / transcription regulator/ zinc ion binding
262379_at	AT1G73020	1.31034	0.002421	unknown protein
252313_at	AT3G49390	1.30451	0.003374	CID10; RNA binding / protein binding
250040_at	AT5G18390	1.30451	0.01138	pentatricopeptide (PPR) repeat-containing protein
258489_at	AT3G02520	1.30451	0.001188	GRF7 (GENERAL REGULATORY FACTOR 7); protein binding / protein phosphorylated amino acid binding
245227_s_at	AT1G08410	1.30451	0.011619	GTP-binding family protein
258976_at	AT3G01980	1.30451	0.009307	short-chain dehydrogenase/reductase (SDR) family protein
255439_at	AT4G03080	1.29866	0.000617	kelch repeat-containing serine/threonine phosphoesterase family protein
257687_at	AT3G12800	1.29866	0.01051	SDRB (SHORT-CHAIN DEHYDROGENASE-REDUCTASE B); binding / catalytic/ oxidoreductase
257407_at	AT1G27100	1.29866	0.011078	FUNCTIONS IN: molecular_function unknown; INVOLVED IN: biological_process unknown; LOCATED IN: vacuole; EXPRESSED IN: 23 plant structures; EXPRESSED DURING: 13 growth stages; CONTAINS InterPro DOMAIN/s: Protein of unknown function DUF569 (InterPro:IPR007679), Actin_cross-linking (InterPro:IPR008999); BEST Arabidopsis thaliana protein match is: unknown protein (TAIR:AT1G69900.1); Has 184 Blast hit…
258871_at	AT3G03060	1.29866	0.001567	ATP binding / ATPase/ nucleoside-triphosphatase/ nucleotide binding
250912_at	AT5G03740	1.29866	0.000947	HD2C (HISTONE DEACETYLASE 2C); histone deacetylase/ nucleic acid binding / transcription repressor/ zinc ion binding
267208_at	AT2G30980	1.29866	7.8e-05	ASKdZeta (Arabidopsis SHAGGY-related protein kinase dZeta); ATP binding / kinase/ protein kinase/ protein serine/threonine kinase
261164_at	AT1G34470	1.29866	0.004719	permease-related
249515_at	AT5G38530	1.29278	0.009602	tryptophan synthase-related
249512_at	AT5G38470	1.29278	0.002247	DNA repair protein RAD23, putative
265037_at	AT1G03860	1.29278	0.00619	ATPHB2 (PROHIBITIN 2)
251922_at	AT3G54030	1.29278	0.010813	protein kinase family protein
246029_at	AT5G21090	1.29278	0.00157	leucine-rich repeat protein, putative
259436_at	AT1G01500	1.29278	0.001203	unknown protein
255683_at	AT4G00570	1.29278	0.007032	malate oxidoreductase, putative
249028_at	AT5G44740	1.29278	0.001309	POLH (Y-FAMILT DNA POLYMERASE H); DNA-directed DNA polymerase
264967_at	AT1G67250	1.28688	0.001325	proteasome maturation factor UMP1 family protein
261168_at	AT1G04945	1.28688	0.004726	FUNCTIONS IN: molecular_function unknown; INVOLVED IN: biological_process unknown; LOCATED IN: cellular_component unknown; EXPRESSED IN: 14 plant structures; EXPRESSED DURING: 6 growth stages; CONTAINS InterPro DOMAIN/s: Zinc finger, HIT-type (InterPro:IPR007529); Has 296 Blast hits to 294 proteins in 138 species: Archae - 0; Bacteria - 0; Metazoa - 111; Fungi - 94; Plants - 29; Viruses - 0; Othe…
260133_at	AT1G66340	1.28688	0.001254	ETR1 (ETHYLENE RESPONSE 1); ethylene binding / protein histidine kinase/ two-component response regulator
259960_at	AT1G53710	1.28688	0.001487	hydrolase/ protein serine/threonine phosphatase
257154_at	AT3G27210	1.28688	0.005842	unknown protein
253564_at	AT4G31170	1.28688	0.003137	protein kinase family protein
251879_at	AT3G54200	1.28688	0.004958	FUNCTIONS IN: molecular_function unknown; INVOLVED IN: biological_process unknown; LOCATED IN: anchored to plasma membrane, plasma membrane; EXPRESSED IN: 23 plant structures; EXPRESSED DURING: 14 growth stages; CONTAINS InterPro DOMAIN/s: Harpin-induced 1 (InterPro:IPR010847); BEST Arabidopsis thaliana protein match is: unknown protein (TAIR:AT3G05975.1); Has 405 Blast hits to 404 proteins in 16…
252712_at	AT3G43800	1.28688	0.005279	ATGSTU27 (GLUTATHIONE S-TRANSFERASE TAU 27); glutathione transferase
255452_at	AT4G02880	1.28096	0.004362	unknown protein
262221_at	AT1G75010	1.28096	0.001171	ARC3 (ACCUMULATION AND REPLICATION OF CHLOROPLASTS 3)
255032_at	AT4G09500	1.28096	0.008088	glycosyltransferase family protein
267609_at	AT2G26780	1.28096	0.000141	binding
247138_at	AT5G66120	1.28096	0.001876	3-dehydroquinate synthase, putative
262950_at	AT1G75510	1.28096	0.001639	transcription initiation factor IIF beta subunit (TFIIF-beta) family protein
248868_at	AT5G46780	1.28096	0.012402	VQ motif-containing protein
247860_at	AT5G58240	1.28096	0.006579	bis(5'-adenosyl)-triphosphatase, putative
252041_at	AT3G52090	1.27501	0.001597	NRPB11; DNA binding / DNA-directed RNA polymerase
252069_s_at	AT3G51640;AT3G51650	1.27501	0.003562	[AT3G51640, unknown protein];[AT3G51650, unknown protein]
245092_at	AT2G40950	1.27501	0.000636	BZIP17; DNA binding / transcription activator/ transcription factor
267269_at	AT2G02560	1.27501	0.001211	CAND1 (CULLIN-ASSOCIATED AND NEDDYLATION DISSOCIATED); binding
250374_at	AT5G11530	1.27501	0.006411	EMF1 (embryonic flower 1); transcription regulator
252990_at	AT4G38440	1.27501	0.00055	LOCATED IN: chloroplast; EXPRESSED IN: 21 plant structures; EXPRESSED DURING: 12 growth stages; CONTAINS InterPro DOMAIN/s: RNA polymerase II-associated protein 1, C-terminal (InterPro:IPR013929), RNA polymerase II-associated protein 1, N-terminal (InterPro:IPR013930); Has 210 Blast hits to 166 proteins in 68 species: Archae - 0; Bacteria - 2; Metazoa - 135; Fungi - 41; Plants - 22; Viruses - 0; …
262794_at	AT1G13120	1.27501	0.008117	emb1745 (embryo defective 1745)
265423_at	AT2G20790	1.26903	7.7e-05	protein binding
248539_at	AT5G50130	1.26903	0.00475	short-chain dehydrogenase/reductase (SDR) family protein
262967_at	AT1G75730	1.26903	0.001475	unknown protein
263926_at	AT2G21800	1.26903	0.000725	ATEME1A (ARABIDOPSIS ESSENTIAL MEIOTIC ENDONUCLEASE 1A); endonuclease
253005_at	AT4G38100	1.26303	0.00487	unknown protein
256086_at	AT1G20770	1.26303	0.010289	unknown protein
253603_at	AT4G30935	1.26303	0.003263	WRKY32; transcription factor
267059_at	AT2G32520	1.26303	0.00493	dienelactone hydrolase family protein
260502_at	AT1G47270	1.26303	0.005546	AtTLP6 (TUBBY LIKE PROTEIN 6); phosphoric diester hydrolase/ transcription factor
261560_at	AT1G01710	1.26303	0.007031	acyl-CoA thioesterase family protein
254412_at	AT4G21430	1.26303	0.004808	B160; protein binding / transcription factor/ zinc ion binding
258046_at	AT3G21220	1.26303	0.00447	ATMKK5 (ARABIDOPSIS THALIANA MITOGEN-ACTIVATED PROTEIN KINASE KINASE 5); MAP kinase kinase/ kinase
254020_at	AT4G25700	1.26303	0.003109	BETA-OHASE 1 (BETA-HYDROXYLASE 1); carotene beta-ring hydroxylase
260981_at	AT1G53460	1.26303	4.4e-05	unknown protein
245315_at	AT4G14800	1.26303	0.012814	PBD2 (20S PROTEASOME BETA SUBUNIT 2); peptidase/ threonine-type endopeptidase
250655_at	AT5G06960	1.26303	0.000182	OBF5 (OCS-ELEMENT BINDING FACTOR 5); DNA binding / protein binding / transcription factor
254641_at	AT4G18800	1.26303	0.008778	ATRABA1D (ARABIDOPSIS RAB GTPASE HOMOLOG A1D); GTP binding
259119_at	AT3G01340	1.26303	0.006808	protein transport protein SEC13 family protein / WD-40 repeat family protein
258647_at	AT3G07870	1.25701	0.005727	F-box family protein
262777_at	AT1G13030	1.25701	0.003934	sphere organelles protein-related
253673_at	AT4G29530	1.25701	0.001335	2,3-diketo-5-methylthio-1-phosphopentane phosphatase family
263037_at	AT1G23230	1.25701	0.003364	unknown protein
255148_at	AT4G08470	1.25701	0.008062	MAPKKK10; ATP binding / kinase/ protein kinase/ protein serine/threonine kinase
245134_s_at	AT4G38280;AT2G45250	1.25701	0.000575	[AT4G38280, unknown protein];[AT2G45250, unknown protein]
251687_at	AT3G56460	1.25701	0.001102	oxidoreductase, zinc-binding dehydrogenase family protein
261866_at	AT1G50420	1.25096	0.005462	SCL3; transcription factor
250990_at	AT5G02290	1.25096	0.010146	NAK; ATP binding / kinase/ protein kinase/ protein serine/threonine kinase/ protein tyrosine kinase
245685_at	AT5G22220	1.25096	0.009441	E2F1; DNA binding / protein binding / transcription factor
249849_at	AT5G23230	1.25096	0.002891	NIC2 (NICOTINAMIDASE 2); catalytic/ nicotinamidase
260732_at	AT1G17520	1.25096	0.000687	DNA-binding protein, putative
259488_at	AT1G15780	1.24489	0.000998	unknown protein
247659_at	AT5G60040	1.24489	0.000148	NRPC1; DNA binding / DNA-directed RNA polymerase/ ribonucleoside binding / zinc ion binding
257940_at	AT3G21790	1.24489	0.000973	UDP-glucoronosyl/UDP-glucosyl transferase family protein
250978_at	AT5G03080	1.24489	0.001669	phosphatidic acid phosphatase-related / PAP2-related
257802_at	AT3G18770	1.24489	0.001022	LOCATED IN: chloroplast; EXPRESSED IN: 6 plant structures; EXPRESSED DURING: 4 anthesis, petal differentiation and expansion stage; CONTAINS InterPro DOMAIN/s: Autophagy-related protein 13 (InterPro:IPR018731); BEST Arabidopsis thaliana protein match is: unknown protein (TAIR:AT3G49590.2); Has 376 Blast hits to 291 proteins in 100 species: Archae - 0; Bacteria - 15; Metazoa - 70; Fungi - 108; Pla…
260946_at	AT1G06010	1.24489	0.00016	unknown protein
254422_at	AT4G21560	1.24489	0.002161	VPS28-1 (VACUOLAR PROTEIN SORTING-ASSOCIATED PROTEIN 28 HOMOLOG 1); transporter
247054_at	AT5G66730	1.24489	0.000916	zinc finger (C2H2 type) family protein
252785_at	AT3G42660	1.24489	0.007704	nucleotide binding
254804_at	AT4G13010	1.23879	0.000215	oxidoreductase, zinc-binding dehydrogenase family protein
263240_s_at	AT2G16530;AT1G72590	1.23879	0.007032	[AT2G16530, 3-oxo-5-alpha-steroid 4-dehydrogenase family protein / steroid 5-alpha-reductase family protein];[AT1G72590, 3-oxo-5-alpha-steroid 4-dehydrogenase family protein / steroid 5-alpha-reductase family protein]
265190_at	AT1G23780	1.23879	0.001267	F-box family protein
260065_at	AT1G73760	1.23879	0.00163	zinc finger (C3HC4-type RING finger) family protein
260039_at	AT1G68795	1.23879	0.007186	CLE12 (CLAVATA3/ESR-RELATED 12); protein binding / receptor binding
258650_at	AT3G09830	1.23879	0.009512	protein kinase, putative
266987_at	AT2G39280	1.23879	0.00964	RAB GTPase activator
266457_at	AT2G22780	1.23879	0.006802	PMDH1 (PEROXISOMAL NAD-MALATE DEHYDROGENASE 1); L-malate dehydrogenase/ binding / catalytic/ malate dehydrogenase/ oxidoreductase/ oxidoreductase, acting on the CH-OH group of donors, NAD or NADP as acceptor
260728_at	AT1G48210	1.23879	0.002459	serine/threonine protein kinase, putative
264984_at	AT1G27000	1.23266	0.002395	bZIP family transcription factor
254169_at	AT4G24290	1.23266	0.003516	FUNCTIONS IN: molecular_function unknown; INVOLVED IN: biological_process unknown; LOCATED IN: plasma membrane; EXPRESSED IN: 18 plant structures; EXPRESSED DURING: 9 growth stages; CONTAINS InterPro DOMAIN/s: Membrane attack complex component/perforin/complement C9 (InterPro:IPR001862); BEST Arabidopsis thaliana protein match is: NSL1 (necrotic spotted lesions 1) (TAIR:AT1G28380.1); Has 124 Blas…
264961_at	AT1G76950	1.23266	0.003538	PRAF1; Ran GTPase binding / chromatin binding / zinc ion binding
252206_at	AT3G50360	1.23266	0.006274	ATCEN2 (CENTRIN2); calcium ion binding
262716_at	AT1G16470	1.23266	0.00736	PAB1 (PROTEASOME SUBUNIT PAB1); endopeptidase/ peptidase/ threonine-type endopeptidase
266638_at	AT2G35490	1.23266	0.001349	plastid-lipid associated protein PAP, putative
247351_at	AT5G63790	1.22651	0.003471	ANAC102 (ARABIDOPSIS NAC DOMAIN CONTAINING PROTEIN 102); transcription factor
267194_s_at	AT2G31300;AT2G30910	1.22651	0.012336	[AT2G31300, ARPC1B (ACTIN-RELATED PROTEIN C1B); actin binding / nucleotide binding];[AT2G30910, ARPC1A (ACTIN-RELATED PROTEIN C1A); actin binding / nucleotide binding]
257238_at	AT3G17430	1.22651	0.001531	phosphate translocator-related
257733_at	AT3G18350	1.22651	0.012256	unknown protein
259155_at	AT3G10330	1.22651	0.000366	transcription initiation factor IIB-2 / general transcription factor TFIIB-2 (TFIIB2)
256839_at	AT3G22930	1.22651	0.011751	calmodulin, putative
261902_at	AT1G80860	1.22651	0.00045	PLMT (PHOSPHOLIPID N-METHYLTRANSFERASE); phosphatidyl-N-dimethylethanolamine N-methyltransferase/ phosphatidyl-N-methylethanolamine N-methyltransferase
254268_at	AT4G23040	1.22651	0.010868	UBX domain-containing protein
247419_at	AT5G63080	1.22651	0.004096	transcription factor jumonji (jmjC) domain-containing protein
246614_at	AT5G35410	1.22651	0.007106	SOS2 (SALT OVERLY SENSITIVE 2); kinase/ protein kinase
254562_at	AT4G19230	1.22033	0.008871	CYP707A1; (+)-abscisic acid 8'-hydroxylase/ oxygen binding
251033_at	AT5G01960	1.22033	0.001032	zinc finger (C3HC4-type RING finger) family protein
261116_at	AT1G75370	1.22033	0.011696	SEC14 cytosolic factor, putative / phosphatidylinositol transfer-like protein, putative
246070_at	AT5G20160	1.22033	0.009038	ribosomal protein L7Ae/L30e/S12e/Gadd45 family protein
250403_at	AT5G10920	1.22033	0.008803	argininosuccinate lyase, putative / arginosuccinase, putative
257182_s_at	AT3G13210;AT5G45990	1.22033	0.000706	[AT3G13210, crooked neck protein, putative / cell cycle protein, putative];[AT5G45990, crooked neck protein, putative / cell cycle protein, putative]
256741_at	AT3G29375	1.22033	0.003452	XH domain-containing protein
249728_at	AT5G24390	1.22033	0.002769	RabGAP/TBC domain-containing protein
260842_at	AT1G29150	1.22033	0.003447	ATS9 (ARABIDOPSIS NON-ATPASE SUBUNIT 9)
251148_at	AT3G63180	1.21412	0.00217	TKL (TIC-LIKE)
256074_at	AT1G18260	1.21412	0.003353	suppressor of lin-12-like protein-related / sel-1 protein-related
257566_x_at	AT3G29610	1.21412	0.011855	transposable element gene
253780_at	AT4G28400	1.21412	0.009241	protein phosphatase 2C, putative / PP2C, putative
266679_at	AT2G03270	1.21412	0.00058	DNA-binding protein, putative
262908_at	AT1G59900	1.21412	0.000953	AT-E1 ALPHA; oxidoreductase, acting on the aldehyde or oxo group of donors, disulfide as acceptor / pyruvate dehydrogenase (acetyl-transferring)
253451_at	AT4G32730	1.21412	0.01118	PC-MYB1; DNA binding / transcription coactivator/ transcription factor
252094_at	AT3G51260	1.21412	0.010945	PAD1 (20s proteasome alpha subunit pad1); endopeptidase/ peptidase/ threonine-type endopeptidase
260711_at	AT1G17580	1.21412	0.002643	MYA1 (MYOSIN 1); motor/ protein binding
261858_at	AT1G50570	1.21412	0.010767	C2 domain-containing protein
255335_at	AT4G04430	1.20789	0.008898	transposable element gene
249175_at	AT5G42970	1.20789	0.002386	COP8 (CONSTITUTIVE PHOTOMORPHOGENIC 8); protein binding
256322_at	AT1G54990	1.20789	0.006115	AXR4 (AUXIN RESISTANT 4)
251917_at	AT3G53970	1.20789	0.007695	proteasome inhibitor-related
267448_at	AT2G33700	1.20789	0.004267	protein phosphatase 2C, putative / PP2C, putative
247997_at	AT5G56180	1.20789	0.010265	ATARP8 (ACTIN-RELATED PROTEIN 8); structural constituent of cytoskeleton
257989_at	AT3G19770	1.20789	0.000429	VPS9A; Rho guanyl-nucleotide exchange factor
250577_at	AT5G07910	1.20163	0.005684	leucine-rich repeat family protein
257422_at	AT1G11940	1.20163	0.000578	unknown protein
249321_at	AT5G40920	1.20163	0.007433	pseudogene, disease resistance protein (TIR-NBS-LRR class), putative, domain signature TIR-NBS-LRR exists, suggestive of a disease resistance protein.
250309_at	AT5G12220	1.20163	0.000131	las1-like family protein
251578_at	AT3G58180	1.20163	0.008113	PBS lyase HEAT-like repeat-containing protein
254238_at	AT4G23540	1.19535	0.001249	binding
246953_at	AT5G04850	1.19535	0.000114	VPS60.2
247821_at	AT5G58230	1.19535	0.003382	MSI1 (MULTICOPY SUPRESSOR OF IRA1); protein binding
259214_at	AT3G09085	1.18903	0.006734	unknown protein
259712_at	AT1G77440	1.18903	0.007022	PBC2; peptidase/ threonine-type endopeptidase
258536_at	AT3G06540	1.18903	0.006023	GDP dissociation inhibitor family protein / Rab GTPase activator family protein
258137_at	AT3G24515	1.18903	0.011869	UBC37 (ubiquitin-conjugating enzyme 37); small conjugating protein ligase/ ubiquitin-protein ligase
246366_at	AT1G51850	1.18903	0.007266	leucine-rich repeat protein kinase, putative
247176_at	AT5G65110	1.18903	0.001384	ACX2 (ACYL-COA OXIDASE 2); acyl-CoA oxidase
262499_at	AT1G21770	1.18903	0.001719	FUNCTIONS IN: molecular_function unknown; INVOLVED IN: biological_process unknown; LOCATED IN: peroxisome; EXPRESSED IN: 22 plant structures; EXPRESSED DURING: 13 growth stages; CONTAINS InterPro DOMAIN/s: Acyl-CoA N-acyltransferase (InterPro:IPR016181); BEST Arabidopsis thaliana protein match is: H3/H4 histone acetyltransferase (TAIR:AT1G77540.1); Has 221 Blast hits to 221 proteins in 107 specie…
259184_at	AT3G01520	1.18903	0.005206	universal stress protein (USP) family protein
261379_at	AT1G18720	1.18903	0.000451	unknown protein
247721_at	AT5G59140	1.18903	0.001435	SKP1 family protein
262781_s_at	AT3G26340;AT1G13060	1.18903	0.004601	[AT3G26340, 20S proteasome beta subunit E, putative];[AT1G13060, PBE1; endopeptidase/ peptidase/ threonine-type endopeptidase]
250020_at	AT5G18180	1.18269	0.000157	Gar1 RNA-binding region family protein
247514_at	AT5G61640	1.18269	0.005513	PMSR1 (PEPTIDEMETHIONINE SULFOXIDE REDUCTASE 1); oxidoreductase, acting on sulfur group of donors, disulfide as acceptor / peptide-methionine-(S)-S-oxide reductase
250330_at	AT5G11810	1.18269	0.003296	unknown protein
267266_at	AT2G23150	1.18269	0.00832	NRAMP3 (NATURAL RESISTANCE-ASSOCIATED MACROPHAGE PROTEIN 3); inorganic anion transmembrane transporter/ manganese ion transmembrane transporter/ metal ion transmembrane transporter
246510_at	AT5G15410	1.18269	0.008919	DND1 (DEFENSE NO DEATH 1); calcium channel/ calmodulin binding / cation channel/ cyclic nucleotide binding / intracellular cAMP activated cation channel/ intracellular cyclic nucleotide activated cation channel/ inward rectifier potassium channel
264921_at	AT1G60650	1.18269	0.000728	glycine-rich RNA-binding protein, putative
266187_at	AT2G38970	1.18269	0.004588	zinc finger (C3HC4-type RING finger) family protein
251449_at	AT3G59920	1.17632	0.008438	ATGDI2 (RAB GDP DISSOCIATION INHIBITOR 2); RAB GDP-dissociation inhibitor
265353_at	AT2G16800	1.17632	0.005279	high-affinity nickel-transport family protein
263716_at	AT2G20580	1.17632	0.001908	RPN1A (26S PROTEASOME REGULATORY SUBUNIT S2 1A); binding / enzyme regulator
251561_at	AT3G57870	1.17632	0.003242	SCE1 (SUMO CONJUGATION ENZYME 1); SUMO ligase
246026_at	AT5G21070	1.17632	0.003426	unknown protein
255684_at	AT4G00590	1.16993	0.001411	asparaginase 2 family protein
260190_at	AT1G67560	1.16993	5e-06	lipoxygenase family protein
266060_at	AT2G18630	1.16993	0.004506	unknown protein
247532_at	AT5G61560	1.16993	0.005494	protein kinase family protein
245333_at	AT4G14615	1.16993	0.004671	unknown protein
248453_at	AT5G51340	1.16993	0.002822	unknown protein
247513_at	AT5G61510	1.16993	6e-05	NADP-dependent oxidoreductase, putative
254529_at	AT4G19540	1.16993	0.007062	INDL (IND1(IRON-SULFUR PROTEIN REQUIRED FOR NADH DEHYDROGENASE)-LIKE)
247198_at	AT5G65290	1.16993	0.002711	LMBR1 integral membrane family protein
247609_at	AT5G60940	1.16993	0.012644	transducin family protein / WD-40 repeat family protein
259521_at	AT1G12410	1.16993	0.003687	CLP2 (CLP PROTEASE PROTEOLYTIC SUBUNIT 2); serine-type endopeptidase
259368_at	AT1G69100	1.16993	0.007147	aspartic-type endopeptidase
267145_at	AT2G38130	1.1635	0.000321	ATMAK3; N-acetyltransferase
259023_at	AT3G07510	1.1635	0.012791	unknown protein
253279_at	AT4G34030	1.1635	0.009758	MCCB (3-METHYLCROTONYL-COA CARBOXYLASE); biotin carboxylase/ methylcrotonoyl-CoA carboxylase
253735_at	AT4G29160	1.1635	0.001499	SNF7.1
264152_at	AT1G02140	1.1635	0.0011	MAGO (MAGO NASHI); protein binding
246278_at	AT4G37190	1.1635	0.000651	INVOLVED IN: protein polymerization; LOCATED IN: cytosol, plasma membrane; EXPRESSED IN: 20 plant structures; EXPRESSED DURING: 13 growth stages; CONTAINS InterPro DOMAIN/s: Beta tubulin, autoregulation binding site (InterPro:IPR013838), Tubulin/FtsZ, GTPase (InterPro:IPR003008); Has 251 Blast hits to 250 proteins in 111 species: Archae - 0; Bacteria - 0; Metazoa - 122; Fungi - 89; Plants - 28; V…
261413_at	AT1G07630	1.1635	0.006036	PLL5; catalytic/ protein serine/threonine phosphatase
255865_at	AT2G30330	1.1635	0.0077	GCN5L1 family protein
264985_at	AT1G27150	1.1635	0.000618	binding
259225_at	AT3G07590	1.1635	0.00223	small nuclear ribonucleoprotein D1, putative / snRNP core protein D1, putative / Sm protein D1, putative
250861_at	AT5G04740	1.15704	0.009407	ACT domain-containing protein
256394_at	AT3G06290	1.15704	0.011534	FUNCTIONS IN: molecular_function unknown; INVOLVED IN: biological_process unknown; LOCATED IN: cellular_component unknown; EXPRESSED IN: 24 plant structures; EXPRESSED DURING: 15 growth stages; CONTAINS InterPro DOMAIN/s: SAC3/GANP/Nin1/mts3/eIF-3 p25 (InterPro:IPR005062); BEST Arabidopsis thaliana protein match is: SAC3/GANP family protein (TAIR:AT3G54380.1); Has 1341 Blast hits to 841 proteins …
253117_at	AT4G35905	1.15704	0.009783	unknown protein
254702_at	AT4G17940	1.15704	0.006064	binding
247444_at	AT5G62630	1.15704	0.010928	HIPL2 (HIPL2 PROTEIN PRECURSOR); catalytic
252956_at	AT4G38580	1.15704	0.009595	ATFP6 (FARNESYLATED PROTEIN 6); metal ion binding
250489_s_at	AT5G09720;AT5G09710	1.15704	0.001542	[AT5G09720, metal ion transmembrane transporter];[AT5G09710, magnesium transporter CorA-like family protein]
252947_at	AT4G38600	1.15704	0.002249	KAK (KAKTUS); ubiquitin-protein ligase
256547_at	AT3G14840	1.15704	0.004642	leucine-rich repeat family protein / protein kinase family protein
260580_at	AT2G47390	1.15704	0.010413	serine-type endopeptidase/ serine-type peptidase
252507_at	AT3G46200	1.15704	0.002019	aTNUDT9 (Arabidopsis thaliana Nudix hydrolase homolog 9); hydrolase
266694_at	AT2G19790	1.15704	0.003657	clathrin adaptor complex small chain family protein
251985_at	AT3G53220	1.15704	0.00867	thioredoxin family protein
264084_at	AT2G31240	1.15056	0.003989	tetratricopeptide repeat (TPR)-containing protein
247295_at	AT5G64180	1.15056	0.00063	unknown protein
248555_at	AT5G50340	1.15056	0.003411	ATP binding / damaged DNA binding / nucleoside-triphosphatase/ nucleotide binding
258430_at	AT3G16785	1.15056	0.00237	PLDP1 (PHOSPHOLIPASE D P1); phospholipase D
257805_at	AT3G18830	1.15056	0.007504	ATPLT5 (POLYOL TRANSPORTER 5); D-ribose transmembrane transporter/ D-xylose transmembrane transporter/ carbohydrate transmembrane transporter/ galactose transmembrane transporter/ glucose transmembrane transporter/ glycerol transmembrane transporter/ mann
257754_at	AT3G18820	1.15056	0.012694	ATRAB7B (ARABIDOPSIS RAB GTPASE HOMOLOG G3F); GTP binding
262043_at	AT1G80190	1.15056	0.004348	PSF1 (PARTNER OF SLD FIVE 1)
253873_at	AT4G27540	1.15056	0.008737	PRA1.H (PRENYLATED RAB ACCEPTOR 1.H)
263690_at	AT1G26960	1.15056	0.008864	AtHB23 (ARABIDOPSIS THALIANA HOMEOBOX PROTEIN 23); DNA binding / transcription factor
261955_at	AT1G64520	1.14405	0.010498	RPN12a (Regulatory Particle non-ATPase 12a); peptidase
266639_at	AT2G35520	1.14405	0.000623	DAD2 (DEFENDER AGAINST CELL DEATH 2)
252338_at	AT3G48890	1.14405	0.009232	ATMP2; heme binding
260464_at	AT1G10920	1.14405	0.01302	LOV1; ATP binding
254423_at	AT4G21610	1.14405	0.01141	LOL2 (LSD ONE LIKE 2); transcription factor
258425_at	AT3G16760	1.14405	0.003233	tetratricopeptide repeat (TPR)-containing protein
248087_at	AT5G55060	1.14405	0.00901	unknown protein
255710_at	AT4G00030	1.14405	0.001903	plastid-lipid associated protein PAP / fibrillin family protein
266671_at	AT2G29690	1.14405	0.000197	ASA2 (ANTHRANILATE SYNTHASE 2); anthranilate synthase
250341_at	AT5G11850	1.14405	0.001054	protein kinase family protein
248220_at	AT5G53540	1.1375	0.003491	MSP1 protein, putative / intramitochondrial sorting protein, putative
265343_at	AT2G22570	1.1375	0.002537	NIC1 (NICOTINAMIDASE 1); catalytic/ nicotinamidase
265460_at	AT2G46600	1.1375	0.001467	calcium-binding protein, putative
266557_at	AT2G46080	1.1375	0.00073	INVOLVED IN: biological_process unknown; EXPRESSED IN: 23 plant structures; EXPRESSED DURING: 13 growth stages; BEST Arabidopsis thaliana protein match is: BPS1 (BYPASS 1) (TAIR:AT1G01550.2); Has 94 Blast hits to 83 proteins in 14 species: Archae - 0; Bacteria - 2; Metazoa - 1; Fungi - 0; Plants - 91; Viruses - 0; Other Eukaryotes - 0 (source: NCBI BLink).
258666_at	AT3G08550	1.1375	0.003644	KOB1 (KOBITO)
258531_at	AT3G06720	1.1375	0.007044	IMPA-1 (IMPORTIN ALPHA ISOFORM 1); binding / protein transporter
256413_at	AT3G11100	1.1375	0.008152	transcription factor
253287_at	AT4G34270	1.1375	0.000677	TIP41-like family protein
257177_at	AT3G23490	1.1375	0.005355	CYN (CYANASE); DNA binding / cyanate hydratase/ hydro-lyase
250131_at	AT5G16550	1.1375	0.00063	unknown protein
255889_at	AT1G17840	1.1375	0.008374	WBC11 (WHITE-BROWN COMPLEX HOMOLOG PROTEIN 11); ATPase, coupled to transmembrane movement of substances / fatty acid transporter
265324_at	AT2G18250	1.1375	0.008424	ATCOAD (4-phosphopantetheine adenylyltransferase); nucleotidyltransferase/ pantetheine-phosphate adenylyltransferase
263494_at	AT2G42590	1.1375	0.00117	GRF9 (GENERAL REGULATORY FACTOR 9); calcium ion binding / protein binding / protein phosphorylated amino acid binding
267587_at	AT2G42080	1.1375	0.003868	DNAJ heat shock N-terminal domain-containing protein
256235_at	AT3G12490	1.1375	0.01125	cysteine protease inhibitor, putative / cystatin, putative
265850_at	AT2G35720	1.1375	0.003909	DNAJ heat shock N-terminal domain-containing protein
248237_at	AT5G53890	1.13093	0.000209	leucine-rich repeat transmembrane protein kinase, putative
250986_at	AT5G02850	1.13093	0.008258	hydroxyproline-rich glycoprotein family protein
253869_at	AT4G27510	1.13093	0.002414	unknown protein
257686_at	AT3G12800	1.13093	0.01252	SDRB (SHORT-CHAIN DEHYDROGENASE-REDUCTASE B); binding / catalytic/ oxidoreductase
245456_at	AT4G16950	1.13093	0.000606	RPP5 (RECOGNITION OF PERONOSPORA PARASITICA 5); nucleotide binding
265474_at	AT2G15690	1.13093	0.004751	pentatricopeptide (PPR) repeat-containing protein
260200_at	AT1G67620	1.13093	0.000228	FUNCTIONS IN: molecular_function unknown; INVOLVED IN: biological_process unknown; LOCATED IN: cellular_component unknown; EXPRESSED IN: 17 plant structures; EXPRESSED DURING: 12 growth stages; CONTAINS InterPro DOMAIN/s: Iojap-related protein (InterPro:IPR004394); Has 3104 Blast hits to 3104 proteins in 983 species: Archae - 0; Bacteria - 1779; Metazoa - 74; Fungi - 0; Plants - 34; Viruses - 0; …
263076_at	AT2G17520	1.13093	0.00984	IRE1A; endoribonuclease/ kinase
263159_at	AT1G54130	1.13093	0.004913	RSH3 (RELA/SPOT HOMOLOG 3); GTP diphosphokinase
260878_at	AT1G21450	1.13093	0.004046	SCL1 (SCARECROW-LIKE 1); transcription factor
258747_at	AT3G05810	1.13093	0.001359	unknown protein
263546_at	AT2G21550	1.13093	0.00744	bifunctional dihydrofolate reductase-thymidylate synthase, putative / DHFR-TS, putative
257412_at	no_match	1.13093	0.010143	no_match
247507_at	AT5G61930	1.13093	0.012002	APO3 (ACCUMULATION OF PHOTOSYSTEM ONE 3)
251098_at	AT5G01650	1.13093	0.012802	macrophage migration inhibitory factor family protein / MIF family protein
246006_at	AT5G08290	1.12433	0.012131	YLS8; catalytic
250675_at	AT5G06260	1.12433	0.001082	nucleolar protein-related
247375_at	AT5G63135	1.12433	0.00263	unknown protein
267182_at	AT2G23360	1.12433	0.010818	transport protein-related
247403_at	AT5G62740	1.12433	0.008621	band 7 family protein
253759_at	AT4G29010	1.12433	0.003011	AIM1 (ABNORMAL INFLORESCENCE MERISTEM); enoyl-CoA hydratase
248605_at	AT5G49410	1.12433	0.003968	unknown protein
247521_at	AT5G61450	1.12433	0.005445	2-phosphoglycerate kinase-related
256380_at	AT1G66680	1.12433	0.003407	AR401
266880_at	AT2G44770	1.12433	0.000659	phagocytosis and cell motility protein ELMO1-related
250094_at	AT5G17380	1.1177	0.001969	pyruvate decarboxylase family protein
265258_at	AT2G20390	1.1177	0.004833	unknown protein
248809_at	AT5G47520	1.1177	0.005637	AtRABA5a (Arabidopsis Rab GTPase homolog A5a); GTP binding
266595_at	AT2G46180	1.1177	0.003214	GC4 (golgin candidate 4)
252034_at	AT3G52040	1.1177	0.011935	unknown protein
261223_at	AT1G19950	1.1177	0.007088	HVA22H (HVA22-LIKE PROTEIN H (ATHVA22H))
250835_at	AT5G04560	1.1177	0.005496	DME (DEMETER); DNA N-glycosylase/ DNA-(apurinic or apyrimidinic site) lyase
267339_at	AT2G39870	1.1177	0.008299	unknown protein
258966_at	AT3G10690	1.1177	0.003683	DNA gyrase subunit A family protein
259583_at	AT1G28070	1.1177	0.00196	INVOLVED IN: biological_process unknown; LOCATED IN: cellular_component unknown; EXPRESSED IN: 23 plant structures; EXPRESSED DURING: 15 growth stages; BEST Arabidopsis thaliana protein match is: protein binding (TAIR:AT2G33510.1); Has 40 Blast hits to 35 proteins in 7 species: Archae - 0; Bacteria - 0; Metazoa - 0; Fungi - 0; Plants - 40; Viruses - 0; Other Eukaryotes - 0 (source: NCBI BLink).
264179_at	AT1G02180	1.1177	0.006435	ferredoxin-related
258373_at	AT3G14290	1.1177	0.005215	PAE2; endopeptidase/ peptidase/ threonine-type endopeptidase
247438_at	AT5G62460	1.1177	0.005344	zinc finger (C3HC4-type RING finger) family protein
252903_at	AT4G39570	1.1177	0.002177	kelch repeat-containing F-box family protein
267004_at	AT2G34260	1.1177	0.008853	transducin family protein / WD-40 repeat family protein
253129_at	AT4G36020	1.1177	0.008401	CSDP1 (cold shock domain protein 1); RNA binding / double-stranded DNA binding / nucleic acid binding / single-stranded DNA binding
266888_s_at	AT2G44750;AT1G02880	1.11103	0.004255	[AT2G44750, TPK2 (Thiamin pyrophosphokinase 2); thiamin diphosphokinase];[AT1G02880, TPK1 (THIAMIN PYROPHOSPHOKINASE1); thiamin diphosphokinase]
257431_at	AT2G36360	1.11103	0.013129	kelch repeat-containing protein
265910_at	AT2G25610	1.11103	0.000912	H+-transporting two-sector ATPase, C subunit family protein
267432_at	AT2G35020	1.11103	0.004764	UTP--glucose-1-phosphate uridylyltransferase family protein
253013_at	AT4G37910	1.11103	0.005431	mtHsc70-1 (mitochondrial heat shock protein 70-1); ATP binding
266574_at	AT2G23890	1.11103	0.003047	5' nucleotidase family protein
254160_at	AT4G24210	1.10434	0.004306	SLY1 (SLEEPY1)
256658_at	AT3G12010;AT3G12012	1.10434	0.002547	[AT3G12010, FUNCTIONS IN: molecular_function unknown; INVOLVED IN: biological_process unknown; EXPRESSED IN: sperm cell, cultured cell; CONTAINS InterPro DOMAIN/s: Colon cancer-associated Mic1-like (InterPro:IPR009755); Has 126 Blast hits to 120 proteins in 58 species: Archae - 0; Bacteria - 0; Metazoa - 93; Fungi - 0; Plants - 16; Viruses - 0; Other Eukaryotes - 17 (source: NCBI BLink).];[AT3G12…
263271_s_at	AT5G28970;AT2G11480;AT5G36030;AT4G19310;AT1G35110	1.10434	0.008498	[AT5G28970, transposable element gene];[AT2G11480, transposable element gene];[AT5G36030, transposable element gene];[AT4G19310, transposable element gene];[AT1G35110, transposable element gene]
251492_at	AT3G59280	1.10434	0.003511	TXR1 (THAXTOMIN A RESISTANT 1)
265538_at	AT2G15860	1.10434	0.002631	unknown protein
246089_at	AT5G20570	1.10434	0.000589	RBX1 (RING-BOX 1); protein binding
245844_at	AT1G26170	1.10434	0.008244	binding / protein transporter
248102_at	AT5G55140	1.10434	0.002138	ribosomal protein L30 family protein
258775_at	AT3G10850	1.10434	0.000651	GLY2; hydroxyacylglutathione hydrolase
245899_at	AT5G11030	1.10434	0.008568	ALF4 (ABERRANT LATERAL ROOT FORMATION 4)
250494_at	AT5G09740	1.10434	0.00921	HAM2 (histone acetyltransferase of the MYST family 2); H3/H4 histone acetyltransferase/ histone acetyltransferase/ nucleic acid binding / zinc ion binding
253633_at	AT4G30480	1.10434	0.001968	tetratricopeptide repeat (TPR)-containing protein
249453_at	AT5G39510	1.09761	0.000872	SGR4 (SHOOT GRAVITROPSIM 4); receptor
254276_at	AT4G22820	1.09761	0.013178	zinc finger (AN1-like) family protein
262821_at	AT1G11800	1.09761	0.012717	endonuclease/exonuclease/phosphatase family protein
267103_at	AT2G41490	1.09761	0.009306	GPT (UDP-GLCNAC%3ADOLICHOL+PHOSPHATE+GLCNAC-1-P+TRANSFERASE); UDP-N-acetylglucosamine-dolichyl-phosphate N-acetylglucosaminephosphotransferase
253918_at	AT4G27320	1.09761	0.001108	universal stress protein (USP) family protein
251378_at	AT3G60660	1.09761	0.006994	unknown protein
251930_at	AT3G53780	1.09761	0.009857	rhomboid family protein
261711_at	AT1G32700	1.09761	0.002124	zinc-binding family protein
267506_at	AT2G45520	1.09761	0.01138	unknown protein
255866_at	AT2G30350	1.09761	0.000764	endo/excinuclease amino terminal domain-containing protein
264939_at	AT1G60630	1.09761	1.3e-05	leucine-rich repeat family protein
257972_at	AT3G27560	1.09085	0.012501	ATN1; kinase/ protein serine/threonine kinase/ protein serine/threonine/tyrosine kinase/ protein tyrosine kinase
252166_at	AT3G50500	1.09085	0.001149	SNRK2.2 (SNF1-RELATED PROTEIN KINASE 2.2); kinase/ protein kinase
267212_at	AT2G44060	1.09085	0.00056	late embryogenesis abundant family protein / LEA family protein
255681_at	AT4G00550	1.09085	0.003585	DGD2; UDP-galactosyltransferase/ UDP-glycosyltransferase/ digalactosyldiacylglycerol synthase/ transferase, transferring glycosyl groups
259699_at	AT1G68940	1.09085	0.001331	armadillo/beta-catenin repeat protein-related / U-box domain-containing protein
265456_at	AT2G46505	1.09085	0.003472	SDH4; succinate dehydrogenase (ubiquinone)
251537_at	AT3G58470	1.09085	0.004009	methyltransferase/ nucleic acid binding
261356_at	AT1G79660	1.09085	0.009912	unknown protein
265738_at	AT2G01350	1.09085	0.013169	QPT (QUINOLINATE PHOSHORIBOSYLTRANSFERASE); nicotinate-nucleotide diphosphorylase (carboxylating)
249483_at	AT5G38895	1.09085	0.002503	zinc finger (C3HC4-type RING finger) family protein
249385_at	AT5G39950	1.09085	0.00236	ATTRX2 (THIOREDOXIN 2); oxidoreductase, acting on sulfur group of donors, disulfide as acceptor
255422_at	AT4G03270	1.08406	0.005381	CYCD6;1 (Cyclin D6;1); cyclin-dependent protein kinase
251106_at	AT5G01500	1.08406	0.002863	mitochondrial substrate carrier family protein
245168_at	AT2G33150	1.08406	0.005438	PKT3 (PEROXISOMAL 3-KETOACYL-COA THIOLASE 3); acetyl-CoA C-acyltransferase
254533_at	AT4G19670	1.08406	0.000328	zinc finger (C3HC4-type RING finger) family protein
254458_at	AT4G21180	1.08406	0.004974	ATERDJ2B; heat shock protein binding / unfolded protein binding
249405_at	AT5G40280	1.07724	0.000486	ERA1 (ENHANCED RESPONSE TO ABA 1); farnesyltranstransferase/ protein farnesyltransferase
250774_at	AT5G05450	1.07724	0.012663	DEAD/DEAH box helicase, putative (RH18)
246335_at	AT3G44880	1.07724	0.007517	ACD1 (ACCELERATED CELL DEATH 1); iron-sulfur cluster binding / pheophorbide a oxygenase
255130_at	AT4G08240	1.07724	0.007706	unknown protein
260954_at	AT1G06130	1.07724	0.006754	GLX2-4 (glyoxalase 2-4); hydrolase/ hydroxyacylglutathione hydrolase/ zinc ion binding
253030_at	AT4G38180	1.07724	0.004069	FRS5 (FAR1-related sequence 5); zinc ion binding
260151_at	AT1G52910	1.07039	0.0058	unknown protein
249608_at	AT5G37310	1.07039	0.003253	LOCATED IN: integral to membrane, Golgi apparatus, plant-type cell wall; EXPRESSED IN: 23 plant structures; EXPRESSED DURING: 13 growth stages; CONTAINS InterPro DOMAIN/s: Nonaspanin (TM9SF) (InterPro:IPR004240); BEST Arabidopsis thaliana protein match is: endomembrane protein 70, putative (TAIR:AT1G14670.1); Has 1019 Blast hits to 986 proteins in 161 species: Archae - 0; Bacteria - 0; Metazoa - …
261513_at	AT1G71840	1.07039	0.002216	transducin family protein / WD-40 repeat family protein
259472_at	AT1G18910	1.07039	0.006323	protein binding / zinc ion binding
263856_at	AT2G04410	1.07039	0.000776	FUNCTIONS IN: molecular_function unknown; INVOLVED IN: biological_process unknown; LOCATED IN: plasma membrane; EXPRESSED IN: 24 plant structures; EXPRESSED DURING: 15 growth stages; CONTAINS InterPro DOMAIN/s: Defence response, Rin4 (InterPro:IPR008700); BEST Arabidopsis thaliana protein match is: NOI (TAIR:AT5G55850.1); Has 141 Blast hits to 140 proteins in 13 species: Archae - 0; Bacteria - 0;…
249822_at	AT5G23710	1.07039	0.00473	DNA binding / DNA-directed RNA polymerase
262860_at	AT1G64810	1.07039	0.008612	APO1 (ACCUMULATION OF PHOTOSYSTEM ONE 1)
247318_at	AT5G63990	1.07039	0.001087	3'(2'),5'-bisphosphate nucleotidase, putative / inositol polyphosphate 1-phosphatase, putative
248834_at	AT5G47090	1.07039	0.006724	unknown protein
258673_at	AT3G08620	1.07039	0.003467	KH domain-containing protein
245236_at	AT4G25540	1.07039	0.001649	MSH3 (Arabidopsis homolog of DNA mismatch repair protein MSH3); damaged DNA binding / mismatched DNA binding / protein binding
254730_at	AT4G13730	1.0635	0.004675	RabGAP/TBC domain-containing protein
253820_at	AT4G28370	1.0635	0.001208	protein binding / zinc ion binding
253282_at	AT4G34120	1.0635	0.002535	LEJ1 (LOSS OF THE TIMING OF ET AND JA BIOSYNTHESIS 1)
261018_at	AT1G26550	1.0635	0.000996	peptidyl-prolyl cis-trans isomerase PPIC-type family protein
246559_at	AT5G15550	1.0635	0.003334	transducin family protein / WD-40 repeat family protein
265442_at	AT2G20940	1.0635	0.001488	unknown protein
246895_at	AT5G25540	1.0635	0.001029	CID6 (CTC-Interacting Domain 6); protein binding
262150_at	AT1G52520	1.05658	0.011584	FRS6 (FAR1-related sequence 6); zinc ion binding
245478_at	AT4G16130	1.05658	0.004522	ARA1 (ARABINOSE KINASE); ATP binding / L-arabinokinase/ galactokinase
254098_at	AT4G25100	1.05658	0.003756	FSD1 (FE SUPEROXIDE DISMUTASE 1); copper ion binding / superoxide dismutase
264591_at	AT2G17670	1.05658	0.011449	pentatricopeptide (PPR) repeat-containing protein
264373_at	AT1G11890	1.05658	0.001917	SEC22; transporter
248126_at	AT5G54760	1.05658	0.005524	eukaryotic translation initiation factor SUI1, putative
251786_at	AT3G55270	1.05658	0.003007	MKP1 (MITOGEN-ACTIVATED PROTEIN KINASE PHOSPHATASE 1); MAP kinase tyrosine/serine/threonine phosphatase
245271_at	AT4G16430	1.05658	0.001929	basic helix-loop-helix (bHLH) family protein
255624_at	AT4G01370	1.05658	0.000748	ATMPK4 (ARABIDOPSIS THALIANA MAP KINASE 4); MAP kinase/ kinase
245097_at	AT2G40935	1.05658	0.007789	unknown protein
254478_at	AT4G20330	1.05658	0.002311	transcription initiation factor-related
258998_at	AT3G01820	1.05658	0.002558	adenylate kinase family protein
265575_at	AT2G14260	1.05658	0.000764	PIP; aminopeptidase
263065_at	AT2G18170	1.05658	0.005144	ATMPK7 (ARABIDOPSIS THALIANA MAP KINASE 7); MAP kinase/ kinase
250896_at	AT5G03560	1.05658	0.012139	nucleobase:cation symporter
250290_at	AT5G13310	1.04963	0.003718	unknown protein
245288_at	AT4G16420	1.04963	0.005441	ADA2B (HOMOLOG OF YEAST ADA2 2B); DNA binding / transcription coactivator/ transcription factor
249177_at	AT5G42850	1.04963	0.00176	INVOLVED IN: cell redox homeostasis; LOCATED IN: cellular_component unknown; EXPRESSED IN: 22 plant structures; EXPRESSED DURING: 13 growth stages; CONTAINS InterPro DOMAIN/s: Thioredoxin fold (InterPro:IPR012335), Thioredoxin-like fold (InterPro:IPR012336), Protein of unknown function DUF953, thioredoxin-like (InterPro:IPR010357); Has 237 Blast hits to 237 proteins in 83 species: Archae - 0; Bac…
264440_at	AT1G27340	1.04963	0.001335	F-box family protein
246327_at	AT1G16670	1.04963	0.012266	protein kinase family protein
266576_at	AT2G23940	1.04963	0.00331	unknown protein
254399_at	AT4G21110	1.04963	8.2e-05	G10 family protein
262360_at	AT1G73080	1.04963	0.005158	PEPR1 (PEP1 receptor 1); ATP binding / kinase/ protein binding / protein serine/threonine kinase
259105_at	AT3G05500	1.04963	0.011214	rubber elongation factor (REF) family protein
245425_at	AT4G17510	1.04963	0.009135	UCH3 (UBIQUITIN C-TERMINAL HYDROLASE 3); ubiquitin thiolesterase
256777_at	AT3G13780	1.04963	0.012359	FUNCTIONS IN: molecular_function unknown; INVOLVED IN: biological_process unknown; LOCATED IN: cellular_component unknown; EXPRESSED IN: 24 plant structures; EXPRESSED DURING: 14 growth stages; CONTAINS InterPro DOMAIN/s: SMAD/FHA domain (InterPro:IPR008984); Has 14184 Blast hits to 8674 proteins in 364 species: Archae - 7; Bacteria - 1751; Metazoa - 6167; Fungi - 1701; Plants - 645; Viruses - 19…
258924_at	AT3G10620	1.04963	0.00573	ATNUDX26 (ARABIDOPSIS THALIANA NUDIX HYDROLASE HOMOLOG 26); bis(5'-adenosyl)-pentaphosphatase/ bis(5'-nucleosyl)-tetraphosphatase (asymmetrical)
257444_at	AT2G12550	1.04264	0.009569	ubiquitin-associated (UBA)/TS-N domain-containing protein
247957_at	AT5G57050	1.04264	0.01225	ABI2 (ABA INSENSITIVE 2); protein serine/threonine phosphatase
246255_at	AT4G36650	1.04264	0.004169	ATPBRP (PLANT-SPECIFIC TFIIB-RELATED PROTEIN); RNA polymerase II transcription factor/ rDNA binding
260827_at	AT1G06740	1.04264	0.001719	transposable element gene
252188_at	AT3G50860	1.04264	0.010045	clathrin adaptor complex small chain family protein
255917_at	AT5G28560	1.04264	0.0047	unknown protein
261132_at	AT1G19800	1.04264	0.002294	TGD1 (TRIGALACTOSYLDIACYLGLYCEROL 1); lipid transporter
246320_at	AT1G16560	1.04264	0.005398	Per1-like family protein
249233_at	AT5G42150	1.03562	0.002611	electron carrier/ protein disulfide oxidoreductase
246030_at	AT5G21105	1.03562	0.009308	L-ascorbate oxidase/ copper ion binding / oxidoreductase
250791_at	AT5G05610	1.03562	0.011155	AL1 (ALFIN-LIKE 1); DNA binding / methylated histone residue binding
258635_at	AT3G08020	1.03562	0.008815	protein binding / zinc ion binding
257996_at	AT3G19950	1.03562	0.002459	zinc finger (C3HC4-type RING finger) family protein
267499_at	AT2G45500	1.03562	0.008599	ATP binding / nucleoside-triphosphatase/ nucleotide binding
245884_at	AT5G09300	1.03562	0.01204	2-oxoisovalerate dehydrogenase, putative / 3-methyl-2-oxobutanoate dehydrogenase, putative / branched-chain alpha-keto acid dehydrogenase E1 alpha subunit, putative
245099_at	AT2G40830	1.03562	0.004792	RHC1A; protein binding / zinc ion binding
248259_at	AT5G53330	1.03562	0.0064	FUNCTIONS IN: molecular_function unknown; INVOLVED IN: biological_process unknown; LOCATED IN: cellular_component unknown; EXPRESSED IN: 21 plant structures; EXPRESSED DURING: 13 growth stages; CONTAINS InterPro DOMAIN/s: Ubiquitin-associated/translation elongation factor EF1B, N-terminal, eukaryote (InterPro:IPR015940); Has 28 Blast hits to 28 proteins in 11 species: Archae - 0; Bacteria - 0; Me…
249217_at	AT5G42300	1.02857	7.9e-05	UBL5 (UBIQUITIN-LIKE PROTEIN 5)
249627_at	AT5G37510	1.02857	0.003637	EMB1467 (embryo defective 1467); NADH dehydrogenase (ubiquinone)/ NADH dehydrogenase/ electron carrier/ iron-sulfur cluster binding / oxidoreductase/ oxidoreductase, acting on NADH or NADPH
247152_at	AT5G65620	1.02857	0.000454	peptidase M3 family protein / thimet oligopeptidase family protein
267396_at	AT2G44270	1.02857	0.002865	ATP binding
248983_at	AT5G45130	1.02857	0.000818	RHA1 (RAB HOMOLOG 1); GTP binding
245862_at	AT5G01010	1.02857	0.008815	EXPRESSED IN: 23 plant structures; EXPRESSED DURING: 14 growth stages; CONTAINS InterPro DOMAIN/s: GOLD (InterPro:IPR009038); Has 51 Blast hits to 51 proteins in 11 species: Archae - 0; Bacteria - 0; Metazoa - 8; Fungi - 0; Plants - 40; Viruses - 0; Other Eukaryotes - 3 (source: NCBI BLink).
249888_s_at	AT5G37340;AT5G22480	1.02857	0.004396	[AT5G37340, zinc finger (ZPR1-type) family protein];[AT5G22480, zinc finger (ZPR1-type) family protein]
254917_at	AT4G11350	1.02148	0.006601	transferase, transferring glycosyl groups
260899_at	AT1G21370	1.02148	0.003511	unknown protein
251849_at	AT3G54610	1.02148	0.01256	GCN5; DNA binding / H3 histone acetyltransferase/ histone acetyltransferase
250390_at	AT5G11340	1.02148	0.009029	GCN5-related N-acetyltransferase (GNAT) family protein
252647_at	AT3G44620	1.02148	0.006714	protein tyrosine phosphatase
264447_at	AT1G27300	1.02148	0.011924	unknown protein
267068_at	AT2G41020	1.02148	0.005772	WW domain-containing protein
258896_at	AT3G05710	1.02148	0.010139	SYP43 (SYNTAXIN OF PLANTS 43); SNAP receptor
250784_at	AT5G05480	1.02148	0.012987	unknown protein
245642_at	AT1G25275	1.02148	0.012995	unknown protein
261588_at	AT1G01670	1.02148	0.00868	U-box domain-containing protein
256279_at	AT3G12620	1.01436	0.000169	protein phosphatase 2C family protein / PP2C family protein
247432_at	AT5G62500	1.01436	0.006734	ATEB1B (END BINDING PROTEIN 1B); microtubule binding
251100_at	AT5G01670	1.01436	0.006771	aldose reductase, putative
260687_at	AT1G17530	1.01436	0.001174	ATTIM23-1 (TRANSLOCASE OF INNER MITOCHONDRIAL MEMBRANE 23); P-P-bond-hydrolysis-driven protein transmembrane transporter
246850_at	AT5G26860	1.01436	0.009506	LON1 (LON PROTEASE 1); ATP binding / ATP-dependent peptidase/ serine-type peptidase
248379_at	AT5G51700	1.01436	0.000662	PBS2 (PPHB SUSCEPTIBLE 2); protein binding / zinc ion binding
258371_at	AT3G14410	1.01436	0.004999	transporter-related
245351_at	AT4G17640	1.0072	0.002377	CKB2; protein kinase CK2 regulator
266646_at	AT2G29700	1.0072	0.004972	ATPH1 (ARABIDOPSIS THALIANA PLECKSTRIN HOMOLOGUE 1); phosphoinositide binding
261557_at	AT1G63640	1.0072	0.000936	kinesin motor protein-related
255947_at	AT1G22040	1.0072	0.001657	kelch repeat-containing F-box family protein
259610_at	AT1G52320	1.0072	0.005643	unknown protein
246921_at	AT5G25080	1.0072	0.006844	FUNCTIONS IN: molecular_function unknown; INVOLVED IN: biological_process unknown; LOCATED IN: cellular_component unknown; EXPRESSED IN: 22 plant structures; EXPRESSED DURING: 13 growth stages; CONTAINS InterPro DOMAIN/s: Sas10/Utp3/C1D (InterPro:IPR007146), Exosome-associated factor Rrp47/DNA strand repair C1D (InterPro:IPR011082); Has 137 Blast hits to 137 proteins in 56 species: Archae - 0; Ba…
253049_at	AT4G37300	1.0072	0.003997	MEE59 (maternal effect embryo arrest 59)
259125_at	AT3G02300	1.0072	0.012732	regulator of chromosome condensation (RCC1) family protein
249077_at	AT5G43940	1.0072	0.009415	HOT5 (sensitive to hot temperatures 5); S-(hydroxymethyl)glutathione dehydrogenase/ S-nitrosoglutathione reductase
256151_at	AT1G55130	1.0072	0.002904	endomembrane protein 70, putative
259069_at	AT3G11710	1.0072	0.002425	ATKRS-1 (ARABIDOPSIS THALIANA LYSYL-TRNA SYNTHETASE 1); ATP binding / aminoacyl-tRNA ligase/ lysine-tRNA ligase/ nucleic acid binding / nucleotide binding
263866_at	AT2G36950	1.0072	0.006868	heavy-metal-associated domain-containing protein
251247_at	AT3G62140	1.0072	0.003096	unknown protein
252941_at	AT4G39280	1	0.008011	phenylalanyl-tRNA synthetase, putative / phenylalanine--tRNA ligase, putative
262653_at	AT1G14130	1	0.004985	2-oxoglutarate-dependent dioxygenase, putative
256254_at	AT3G11290	1	0.000822	unknown protein
257240_at	AT3G24200	1	0.0103	FAD binding / monooxygenase/ oxidoreductase/ oxidoreductase, acting on paired donors, with incorporation or reduction of molecular oxygen, NADH or NADPH as one donor, and incorporation of one atom of oxygen
257333_at	ATMG01360	1	0.001726	cytochrome c oxidase subunit 1
248230_at	AT5G53830	1	0.006167	VQ motif-containing protein
264097_s_at	AT1G16700;AT1G79010	1	0.00356	[AT1G16700, NADH-ubiquinone oxidoreductase 23 kDa subunit, mitochondrial, putative];[AT1G79010, NADH-ubiquinone oxidoreductase 23 kDa subunit, mitochondrial (TYKY)]
262222_at	AT1G74700	1	0.003386	TRZ1 (TRNASE Z 1); 3'-tRNA processing endoribonuclease
258544_at	AT3G07040	1	0.001535	RPM1 (RESISTANCE TO P. SYRINGAE PV MACULICOLA 1); nucleotide binding / protein binding
259461_at	AT1G18900	1	0.006211	pentatricopeptide (PPR) repeat-containing protein
248007_at	AT5G56260	1	0.005269	dimethylmenaquinone methyltransferase family protein
248942_at	AT5G45480	1	0.009241	unknown protein
256034_at	AT1G07080	0.992768	0.000813	gamma interferon responsive lysosomal thiol reductase family protein / GILT family protein
246162_at	AT4G36400	0.992768	0.000852	FAD linked oxidase family protein
266398_at	no_match	0.992768	0.000935	no_match
247494_at	AT5G61790	0.992768	0.00912	calnexin 1 (CNX1)
253452_at	AT4G31930	0.992768	0.003202	mitochondrial glycoprotein family protein / MAM33 family protein
250422_at	AT5G10840	0.992768	0.010227	endomembrane protein 70, putative
257174_at	AT3G27190	0.992768	0.001207	uracil phosphoribosyltransferase, putative / UMP pyrophosphorylase, putative / UPRTase, putative
263446_at	AT2G31650	0.992768	0.007261	ATX1 (ARABIDOPSIS HOMOLOGUE OF TRITHORAX); histone-lysine N-methyltransferase/ phosphatidylinositol-5-phosphate binding
264480_at	AT1G77300	0.992768	0.010035	EFS (EARLY FLOWERING IN SHORT DAYS); histone methyltransferase(H3-K36 specific) / histone methyltransferase(H3-K4 specific)
256228_at	AT1G56190	0.992768	0.002072	phosphoglycerate kinase, putative
259874_at	AT1G76660	0.992768	0.002414	FUNCTIONS IN: molecular_function unknown; INVOLVED IN: biological_process unknown; LOCATED IN: plasma membrane; EXPRESSED IN: 22 plant structures; EXPRESSED DURING: 13 growth stages; BEST Arabidopsis thaliana protein match is: hydroxyproline-rich glycoprotein family protein (TAIR:AT5G52430.1); Has 280 Blast hits to 160 proteins in 42 species: Archae - 0; Bacteria - 4; Metazoa - 55; Fungi - 17; Pl…
247225_at	AT5G65090	0.992768	0.007324	BST1 (BRISTLED 1); hydrolase/ inositol or phosphatidylinositol phosphatase
264547_at	AT1G55620	0.9855	0.002621	CLC-F (CHLORIDE CHANNEL F); ion channel/ voltage-gated chloride channel
258154_at	AT3G18210	0.9855	0.007005	oxidoreductase, 2OG-Fe(II) oxygenase family protein
252372_at	AT3G48000	0.9855	0.000611	ALDH2B4 (ALDEHYDE DEHYDROGENASE 2B4); 3-chloroallyl aldehyde dehydrogenase/ ATP binding / aldehyde dehydrogenase (NAD)
253949_at	AT4G26780	0.9855	0.009777	AR192; adenyl-nucleotide exchange factor/ chaperone binding / protein binding / protein homodimerization
264471_at	AT1G67120	0.9855	0.006566	ATP binding / ATPase/ nucleoside-triphosphatase/ nucleotide binding / transcription factor binding
261524_at	AT1G14300	0.9855	0.00224	binding
264867_at	AT1G24150	0.978196	0.006739	FH4 (FORMIN HOMOLOGUE 4); actin binding / protein binding
255525_at	AT4G02340	0.978196	0.006813	epoxide hydrolase, putative
256041_at	AT1G07230	0.978196	0.000479	hydrolase, acting on ester bonds
253637_at	AT4G30390	0.978196	0.013016	unknown protein
266450_s_at	AT2G43190	0.978196	0.002319	ribonuclease P family protein
250324_at	AT5G12040	0.970854	0.011761	carbon-nitrogen hydrolase family protein
248856_at	AT5G46620	0.970854	0.00347	unknown protein
246008_at	AT5G08320	0.970854	0.005542	unknown protein
265222_at	AT2G01970	0.970854	0.00815	endomembrane protein 70, putative
264197_at	AT1G22620	0.970854	0.012096	ATSAC1 (suppressor of actin 1); phosphatidylinositol-4,5-bisphosphate 5-phosphatase
256242_at	AT3G12380	0.970854	0.011644	ATARP5 (ACTIN-RELATED PROTEIN 5); structural constituent of cytoskeleton
254346_at	AT4G21980	0.970854	0.008193	APG8A (AUTOPHAGY 8A); APG8 activating enzyme/ APG8-specific protease/ Atg8 ligase
257744_at	AT3G29230	0.970854	0.003051	pentatricopeptide (PPR) repeat-containing protein
266304_at	AT2G27090	0.970854	0.00066	unknown protein
256967_at	AT3G21060	0.970854	0.009305	transducin family protein / WD-40 repeat family protein
247572_at	AT5G61220	0.970854	0.006562	complex 1 family protein / LVR family protein
260428_at	AT1G72340	0.970854	0.012439	eukaryotic translation initiation factor 2B family protein / eIF-2B family protein
262488_at	AT1G21830	0.970854	0.004873	unknown protein
250119_at	AT5G16470	0.963474	0.001543	zinc finger (C2H2 type) family protein
247958_at	AT5G57070	0.963474	0.001468	hydroxyproline-rich glycoprotein family protein
264320_at	AT1G04090	0.963474	0.003217	unknown protein
259039_at	AT3G09250	0.963474	0.008131	DNA binding / nuclease
253526_at	AT4G31420	0.963474	0.000736	zinc finger (C2H2 type) family protein
260833_at	AT1G06800	0.963474	0.009138	lipase class 3 family protein
258119_at	AT3G14720	0.963474	0.007204	ATMPK19; MAP kinase
250401_at	AT5G10780	0.963474	0.001603	FUNCTIONS IN: molecular_function unknown; INVOLVED IN: biological_process unknown; LOCATED IN: cellular_component unknown; EXPRESSED IN: 22 plant structures; EXPRESSED DURING: 14 growth stages; CONTAINS InterPro DOMAIN/s: Uncharacterised conserved protein UCP017207, transmembrane protein 85 (InterPro:IPR016687), Protein of unknown function DUF1077 (InterPro:IPR009445); Has 281 Blast hits to 281 p…
255520_at	AT4G02230	0.956057	0.004246	60S ribosomal protein L19 (RPL19C)
267444_at	AT2G19180	0.956057	0.003938	unknown protein
259670_at	AT1G52310	0.956057	0.003727	protein kinase family protein / C-type lectin domain-containing protein
248884_at	AT5G46030	0.956057	0.001802	unknown protein
257164_at	AT3G24320	0.956057	0.001871	MSH1 (MUTL PROTEIN HOMOLOG 1); ATP binding / catalytic/ damaged DNA binding / mismatched DNA binding / nuclease
265642_at	AT2G27450	0.956057	0.007175	NLP1 (NITRILASE-LIKE PROTEIN 1); N-carbamoylputrescine amidase/ hydrolase, acting on carbon-nitrogen (but not peptide) bonds
256812_at	AT3G21350	0.956057	0.001627	RNA polymerase transcriptional regulation mediator-related
262814_at	AT1G11660	0.956057	0.012971	heat shock protein, putative
250511_at	AT5G09960	0.956057	0.00157	unknown protein
249345_at	AT5G40740	0.956057	0.006514	unknown protein
258588_s_at	AT3G04120	0.956057	0.006233	GAPC1 (GLYCERALDEHYDE-3-PHOSPHATE DEHYDROGENASE C SUBUNIT 1); glyceraldehyde-3-phosphate dehydrogenase (phosphorylating)/ glyceraldehyde-3-phosphate dehydrogenase
267090_at	AT2G38270	0.956057	0.000187	CXIP2 (CAX-INTERACTING PROTEIN 2); electron carrier/ protein disulfide oxidoreductase
246204_at	AT4G37020	0.956057	0.005696	unknown protein
246980_at	AT5G67530	0.956057	0.000829	peptidyl-prolyl cis-trans isomerase cyclophilin-type family protein
260927_at	AT1G05940	0.948601	0.002487	CAT9 (CATIONIC AMINO ACID TRANSPORTER 9); cationic amino acid transmembrane transporter
258649_at	AT3G09840	0.948601	0.001608	CDC48 (CELL DIVISION CYCLE 48); ATPase/ identical protein binding
253775_at	AT4G28440	0.948601	0.009879	DNA-binding protein-related
260441_at	AT1G68260	0.948601	0.012485	thioesterase family protein
264838_at	AT1G03430	0.948601	0.00834	AHP5 (HISTIDINE-CONTAINING PHOSPHOTRANSFER FACTOR 5); histidine phosphotransfer kinase
247896_at	AT5G57950	0.948601	0.002334	26S proteasome regulatory subunit, putative
255095_at	AT4G08500	0.948601	0.00785	MEKK1 (MAP KINASE KINASE KINASE 1); DNA binding / MAP kinase kinase kinase/ kinase/ kinase binding / protein binding
253360_at	AT4G33090	0.948601	0.00837	APM1 (AMINOPEPTIDASE M1); aminopeptidase
251322_at	AT3G61440	0.948601	0.00169	CYSC1 (CYSTEINE SYNTHASE C1); L-3-cyanoalanine synthase/ cysteine synthase
246217_at	AT4G36920	0.948601	0.003922	AP2 (APETALA 2); transcription factor
260069_at	AT1G73820	0.948601	0.005463	Ssu72-like family protein
262428_at	AT1G47570	0.941106	0.00504	zinc finger (C3HC4-type RING finger) family protein
247132_at	AT5G66200	0.941106	0.003669	ARO2 (ARMADILLO REPEAT ONLY 2); binding
250306_at	AT5G12170	0.941106	0.009268	unknown protein
263626_at	AT2G04880	0.941106	0.012801	ZAP1 (ZINC-DEPENDENT ACTIVATOR PROTEIN-1); transcription activator/ transcription factor/ zinc ion binding
253783_at	AT4G28600	0.941106	0.003092	NPGR2 (no pollen germination related 2); calmodulin binding
246558_at	AT5G15540	0.941106	0.001107	EMB2773 (EMBRYO DEFECTIVE 2773); binding / protein binding / zinc ion binding
259232_at	AT3G11420	0.941106	0.007662	fringe-related protein
263722_at	AT2G13650	0.941106	0.003505	GONST1 (Golgi Nucleotide Sugar Transporter 1); GDP-mannose transmembrane transporter/ nucleotide-sugar transmembrane transporter
256618_at	AT3G24440	0.941106	0.005522	VRN5 (VERNALIZATION 5)
262931_at	AT1G65700	0.941106	0.010449	small nuclear ribonucleoprotein, putative / snRNP, putative / Sm protein, putative
267603_at	AT2G32900	0.941106	0.004095	ATZW10
250465_at	AT5G10070	0.941106	0.006251	RNase L inhibitor protein-related
252867_at	AT4G39870	0.941106	0.002485	FUNCTIONS IN: molecular_function unknown; INVOLVED IN: biological_process unknown; LOCATED IN: cellular_component unknown; EXPRESSED IN: 23 plant structures; EXPRESSED DURING: 15 growth stages; CONTAINS InterPro DOMAIN/s: TLDc (InterPro:IPR006571); BEST Arabidopsis thaliana protein match is: unknown protein (TAIR:AT2G05590.2); Has 2018 Blast hits to 1865 proteins in 220 species: Archae - 0; Bacte…
254814_at	AT4G12340	0.941106	0.002096	FUNCTIONS IN: molecular_function unknown; INVOLVED IN: biological_process unknown; LOCATED IN: cellular_component unknown; EXPRESSED IN: 22 plant structures; EXPRESSED DURING: 14 growth stages; CONTAINS InterPro DOMAIN/s: CHCH (InterPro:IPR010625); Has 33 Blast hits to 31 proteins in 15 species: Archae - 0; Bacteria - 0; Metazoa - 12; Fungi - 0; Plants - 21; Viruses - 0; Other Eukaryotes - 0 (sou…
266127_s_at	AT1G45332;AT2G45030	0.933573	0.002054	[AT1G45332, mitochondrial elongation factor, putative];[AT2G45030, mitochondrial elongation factor, putative]
261561_at	AT1G01730	0.933573	0.002036	unknown protein
247989_at	AT5G56350	0.933573	0.006551	pyruvate kinase, putative
247076_at	AT5G66510	0.933573	0.000844	GAMMA CA3 (GAMMA CARBONIC ANHYDRASE 3); carbonate dehydratase
250836_at	AT5G04560	0.933573	0.00071	DME (DEMETER); DNA N-glycosylase/ DNA-(apurinic or apyrimidinic site) lyase
262856_at	AT1G14910	0.933573	0.000938	epsin N-terminal homology (ENTH) domain-containing protein
262524_at	AT1G17070	0.933573	0.011921	D111/G-patch domain-containing protein
252955_at	AT4G38630	0.933573	0.006948	RPN10 (REGULATORY PARTICLE NON-ATPASE 10); peptide receptor
250458_s_at	AT5G09810	0.933573	0.009171	ACT7 (ACTIN 7); structural constituent of cytoskeleton
259446_at	AT1G02410	0.933573	0.003922	cytochrome c oxidase assembly protein CtaG / Cox11 family
251505_at	AT3G59052;AT3G59050	0.925999	0.012205	[AT3G59052, CPuORF18 (Conserved peptide upstream open reading frame 18)];[AT3G59050, ATPAO3 (Polyamine oxidase 3); polyamine oxidase]
255121_at	AT4G08480	0.925999	0.0104	MAPKKK9; ATP binding / kinase/ protein kinase/ protein serine/threonine kinase
251158_at	AT3G63150	0.925999	0.000884	MIRO2 (MIRO-RELATED GTP-ASE 2); GTPase/ calcium ion binding
263633_at	AT2G04890	0.925999	0.004381	SCL21 (SCARECROW-LIKE 21); transcription factor
252994_at	AT4G38480	0.925999	0.00105	transducin family protein / WD-40 repeat family protein
253950_at	AT4G26910	0.925999	0.009672	2-oxoacid dehydrogenase family protein
254112_at	AT4G24970	0.925999	0.006756	ATP-binding region, ATPase-like domain-containing protein
255009_at	AT4G10070	0.925999	0.005221	KH domain-containing protein
258987_at	AT3G08950	0.918386	0.005641	electron transport SCO1/SenC family protein
257038_at	AT3G19260	0.918386	0.012777	LOH2 (LAG ONE HOMOLOGUE 2)
262272_at	AT1G42440	0.918386	0.012333	FUNCTIONS IN: molecular_function unknown; INVOLVED IN: ribosome biogenesis; LOCATED IN: nucleus; EXPRESSED IN: 22 plant structures; EXPRESSED DURING: 13 growth stages; CONTAINS InterPro DOMAIN/s: AARP2CN (InterPro:IPR012948), Protein of unknown function DUF663 (InterPro:IPR007034); BEST Arabidopsis thaliana protein match is: unknown protein (TAIR:AT1G06720.1); Has 2447 Blast hits to 1812 proteins…
258219_at	AT3G17880	0.918386	0.000676	ATTDX (TETRATICOPEPTIDE DOMAIN-CONTAINING THIOREDOXIN); oxidoreductase, acting on sulfur group of donors, disulfide as acceptor / protein binding
264154_at	AT1G65430	0.918386	0.003807	zinc finger protein-related
250737_at	AT5G06370	0.918386	0.00977	NC domain-containing protein
263178_at	AT1G05550	0.918386	0.004619	unknown protein
246216_at	AT4G36380	0.918386	0.008025	ROT3 (ROTUNDIFOLIA 3); oxidoreductase, acting on paired donors, with incorporation or reduction of molecular oxygen, NADH or NADPH as one donor, and incorporation of one atom of oxygen / oxygen binding / steroid hydroxylase
258610_at	AT3G02875	0.918386	0.01216	ILR1 (IAA-LEUCINE RESISTANT 1); IAA-Leu conjugate hydrolase/ IAA-Phe conjugate hydrolase/ metallopeptidase
251951_s_at	AT3G53630;AT1G55710;AT4G18692	0.910733	0.000502	[AT3G53630, unknown protein];[AT1G55710, unknown protein];[AT4G18692, unknown protein]
253466_at	AT4G32040	0.910733	0.001673	KNAT5 (KNOTTED1-LIKE HOMEOBOX GENE 5); transcription activator/ transcription factor
246789_at	AT5G27600	0.910733	0.009203	LACS7 (LONG-CHAIN ACYL-COA SYNTHETASE 7); long-chain-fatty-acid-CoA ligase/ protein binding
250077_at	AT5G16680	0.910733	0.008184	PHD finger family protein
258187_at	AT3G17880	0.910733	0.003609	ATTDX (TETRATICOPEPTIDE DOMAIN-CONTAINING THIOREDOXIN); oxidoreductase, acting on sulfur group of donors, disulfide as acceptor / protein binding
248386_at	AT5G51940	0.910733	0.00193	NRPB6A; DNA binding / DNA-directed RNA polymerase
253492_at	AT4G31810	0.910733	0.006951	enoyl-CoA hydratase/isomerase family protein
254955_at	AT4G10920	0.910733	0.000112	KELP; DNA binding / transcription coactivator/ transcription regulator
253935_at	AT4G26870	0.910733	0.01312	aspartyl-tRNA synthetase, putative / aspartate--tRNA ligase, putative
247275_at	AT5G64370	0.910733	0.0114	BETA-UP (beta-ureidopropionase); beta-ureidopropionase
248497_at	AT5G50380	0.910733	0.003049	ATEXO70F1 (exocyst subunit EXO70 family protein F1); protein binding
249840_at	AT5G23450	0.910733	0.006377	ATLCBK1 (A. THALIANA LONG-CHAIN BASE (LCB) KINASE 1); D-erythro-sphingosine kinase/ diacylglycerol kinase
258632_s_at	AT3G07980;AT3G13530	0.910733	0.001692	[AT3G07980, MAPKKK6; ATP binding / binding / kinase/ protein kinase/ protein serine/threonine kinase/ protein tyrosine kinase];[AT3G13530, MAPKKK7; ATP binding / binding / kinase/ protein kinase/ protein serine/threonine kinase/ protein tyrosine kinase]
263687_at	AT1G26940	0.910733	0.010971	peptidyl-prolyl cis-trans isomerase cyclophilin-type family protein
246934_at	AT5G25290	0.910733	0.00581	F-box family protein
257250_at	AT3G24120	0.910733	0.009028	myb family transcription factor
265220_at	AT2G02040	0.910733	0.007711	PTR2 (PEPTIDE TRANSPORTER 2); dipeptide transporter/ high affinity oligopeptide transporter/ nitrate transmembrane transporter/ peptide transporter/ transporter/ tripeptide transporter
253223_at	AT4G35000	0.903038	0.000406	APX3 (ASCORBATE PEROXIDASE 3); L-ascorbate peroxidase
258082_at	AT3G25905	0.903038	0.010952	CLE27 (CLAVATA3/ESR-RELATED 27); protein binding / receptor binding
266803_at	AT2G28930	0.903038	0.000743	APK1B; ATP binding / kinase/ protein kinase/ protein serine/threonine kinase
253146_at	AT4G35590	0.903038	0.001304	RWP-RK domain-containing protein
267054_at	AT2G38370	0.903038	0.000568	unknown protein
253602_s_at	AT4G30920;AT4G30910	0.903038	0.008303	[AT4G30920, cytosol aminopeptidase family protein];[AT4G30910, cytosol aminopeptidase family protein]
246976_s_at	AT5G24810	0.903038	0.009657	ABC1 family protein
245401_at	AT4G17670	0.903038	0.00016	senescence-associated protein-related
250141_at	AT5G14640	0.903038	0.006862	SK13 (SHAGGY-LIKE KINASE 13); ATP binding / protein kinase/ protein serine/threonine kinase
266548_at	AT2G35210	0.903038	0.005784	RPA (ROOT AND POLLEN ARFGAP); ARF GTPase activator/ DNA binding / zinc ion binding
247840_at	AT5G58020	0.903038	0.008355	unknown protein
257116_at	AT3G20020	0.903038	0.000279	PRMT6 (PROTEIN ARGININE METHYLTRANSFERASE 6); methyltransferase
261083_at	AT1G07310	0.895303	0.001224	C2 domain-containing protein
259259_at	AT3G11540	0.895303	0.009764	SPY (SPINDLY); protein N-acetylglucosaminyltransferase/ protein binding / transferase, transferring glycosyl groups
248422_at	AT5G51640	0.895303	0.00134	YLS7
257758_at	AT3G22980	0.895303	0.012613	elongation factor Tu family protein
252096_at	AT3G51180	0.895303	0.000465	zinc finger (CCCH-type) family protein
265793_at	AT2G01220	0.895303	0.003377	nucleotidyltransferase
267210_at	AT2G30920	0.895303	0.004643	ATCOQ3 (ARABDIOPSIS THALIANA COENZYME Q 3); hexaprenyldihydroxybenzoate methyltransferase/ polyprenyldihydroxybenzoate methyltransferase
260953_at	AT1G06070	0.895303	0.000532	bZIP transcription factor, putative (bZIP69)
256001_at	AT1G29850	0.895303	0.000965	double-stranded DNA-binding family protein
261530_at	AT1G63460	0.895303	0.011552	glutathione peroxidase, putative
259356_at	AT3G05250	0.887525	0.008111	zinc finger (C3HC4-type RING finger) family protein
262068_at	AT1G80070	0.887525	0.000218	SUS2 (ABNORMAL SUSPENSOR 2)
254462_at	AT4G20150	0.887525	0.004881	unknown protein
252546_at	AT3G45830	0.887525	0.00589	unknown protein
[truncated: 527 more rows]
