# Supplementary material for: Changes in Global Gene Expression in Response to Chemical and Genetic Perturbation of Chromatin Structure
Source: PLoS One. 2011 Jun 3;6(6):e20587. doi: 10.1371/journal.pone.0020587 (PMC3108824; doi:10.1371/journal.pone.0020587)
Supplement: Table S3 — Genes significantly downregulated after 5-AC treatment. (XLSX) [file pone.0020587.s011.xlsx]

## Sheet: SuppTable3
Table S3. Genes Significantly downregulated after 5-AC treatment (2023)
Probe	Gene ID	log2 5-AC/WT	p-value	Gene Description
261956_at	AT1G64590	-6.64386	6.2e-05	short-chain dehydrogenase/reductase (SDR) family protein
248844_s_at	AT5G46900;AT5G46890	-6.64386	0.0003	[AT5G46900, protease inhibitor/seed storage/lipid transfer protein (LTP) family protein];[AT5G46890, protease inhibitor/seed storage/lipid transfer protein (LTP) family protein]
256994_s_at	AT3G25830;AT3G25820	-6.64386	0.002978	[AT3G25830, ATTPS-CIN (terpene synthase-like sequence-1,8-cineole); (E)-beta-ocimene synthase/ myrcene synthase];[AT3G25820, ATTPS-CIN (terpene synthase-like sequence-1,8-cineole); (E)-beta-ocimene synthase/ myrcene synthase]
254820_s_at	AT4G12510;AT4G12520	-6.64386	0.000196	[AT4G12510, protease inhibitor/seed storage/lipid transfer protein (LTP) family protein];[AT4G12520, protease inhibitor/seed storage/lipid transfer protein (LTP) family protein]
265049_at	AT1G52060	-6.64386	0.000273	FUNCTIONS IN: molecular_function unknown; INVOLVED IN: biological_process unknown; LOCATED IN: endomembrane system; EXPRESSED IN: root; CONTAINS InterPro DOMAIN/s: Mannose-binding lectin (InterPro:IPR001229); BEST Arabidopsis thaliana protein match is: jacalin lectin family protein (TAIR:AT1G52070.1); Has 1057 Blast hits to 529 proteins in 40 species: Archae - 0; Bacteria - 2; Metazoa - 4; Fungi …
258239_at	AT3G27690	-6.64386	0.002874	LHCB2.3; chlorophyll binding
252612_at	AT3G45160	-6.64386	0.000261	unknown protein
251221_at	AT3G62550	-6.64386	0.000299	universal stress protein (USP) family protein
255516_at	AT4G02270	-6.64386	0.001607	pollen Ole e 1 allergen and extensin family protein
248676_at	AT5G48850	-6.64386	0.000305	ATSDI1 (SULPHUR DEFICIENCY-INDUCED 1); binding
254915_s_at	AT4G11320;AT4G11310	-6.64386	0.00122	[AT4G11320, cysteine proteinase, putative];[AT4G11310, cysteine proteinase, putative]
255786_at	AT1G19670	-6.64386	0.006161	ATCLH1 (ARABIDOPSIS THALIANA CORONATINE-INDUCED PROTEIN 1); chlorophyllase
253998_at	AT4G26010	-6.64386	0.003536	peroxidase, putative
251226_at	AT3G62680	-6.64386	0.000379	PRP3 (PROLINE-RICH PROTEIN 3); structural constituent of cell wall
249052_at	AT5G44420	-6.64386	0.006564	PDF1.2
245891_at	AT5G09220	-6.64386	0.012907	AAP2 (AMINO ACID PERMEASE 2); amino acid transmembrane transporter
262427_s_at	AT1G47600;AT1G51470	-6.64386	0.000124	[AT1G47600, BGLU34 (BETA GLUCOSIDASE 34); hydrolase, hydrolyzing O-glycosyl compounds / thioglucosidase];[AT1G51470, BGLU35 (BETA GLUCOSIDASE 35); catalytic/ cation binding / hydrolase, hydrolyzing O-glycosyl compounds]
264567_s_at	AT1G05250;AT1G05240	-6.64386	0.007659	[AT1G05250, peroxidase, putative];[AT1G05240, peroxidase, putative]
254564_at	AT4G19170	-6.64386	0.002639	NCED4 (NINE-CIS-EPOXYCAROTENOID DIOXYGENASE 4)
254327_at	AT4G22490	-6.64386	0	protease inhibitor/seed storage/lipid transfer protein (LTP) family protein
258419_at	AT3G16670	-6.64386	0.003612	unknown protein
256736_at	AT3G29410	-6.64386	0.011855	terpene synthase/cyclase family protein
247337_at	AT5G63660	-6.64386	0.000128	PDF2.5
261788_at	AT1G15980	-6.64386	0.000406	NDF1 (NDH-DEPENDENT CYCLIC ELECTRON FLOW 1)
251928_at	AT3G53980	-6.64386	0.004539	protease inhibitor/seed storage/lipid transfer protein (LTP) family protein
249599_at	AT5G37990	-5.64386	0.000238	S-adenosylmethionine-dependent methyltransferase/ methyltransferase
248683_at	AT5G48490	-5.64386	4.8e-05	protease inhibitor/seed storage/lipid transfer protein (LTP) family protein
254907_at	AT4G11190	-5.64386	0.000157	disease resistance-responsive family protein / dirigent family protein
255621_at	AT4G01390	-5.64386	0.00158	FUNCTIONS IN: molecular_function unknown; INVOLVED IN: biological_process unknown; EXPRESSED IN: stem, cotyledon, hypocotyl, root, leaf; EXPRESSED DURING: LP.06 six leaves visible, LP.04 four leaves visible; CONTAINS InterPro DOMAIN/s: TRAF-like (InterPro:IPR008974), MATH (InterPro:IPR002083); BEST Arabidopsis thaliana protein match is: meprin and TRAF homology domain-containing protein / MATH do…
263676_at	AT1G09340	-5.64386	0.006643	CRB (CHLOROPLAST RNA BINDING); binding / catalytic/ coenzyme binding
253971_at	AT4G26530	-5.64386	0.008489	fructose-bisphosphate aldolase, putative
254606_at	AT4G19030	-5.64386	0.00022	NLM1; arsenite transmembrane transporter/ water channel
265048_at	AT1G52050	-5.64386	0.004255	jacalin lectin family protein
263410_at	AT2G04039	-5.64386	0.000345	unknown protein
260230_at	AT1G74500	-5.64386	0.00045	bHLH family protein
255695_at	AT4G00080	-5.64386	0.000889	UNE11 (unfertilized embryo sac 11); enzyme inhibitor/ pectinesterase/ pectinesterase inhibitor
253720_at	AT4G29270	-5.64386	0.000485	acid phosphatase class B family protein
265400_at	AT2G10940	-5.64386	0.007277	protease inhibitor/seed storage/lipid transfer protein (LTP) family protein
263284_at	AT2G36100	-5.64386	0.003859	integral membrane family protein
265050_at	AT1G52070	-5.64386	0.002328	jacalin lectin family protein
260007_at	AT1G67870	-5.64386	0.008709	glycine-rich protein
250469_at	AT5G10130	-5.64386	0.004768	pollen Ole e 1 allergen and extensin family protein
252238_at	AT3G49960	-5.64386	0.001095	peroxidase, putative
255302_at	AT4G04830	-5.64386	0.000789	methionine sulfoxide reductase domain-containing protein / SeIR domain-containing protein
255016_at	AT4G10120	-5.64386	0.000427	ATSPS4F; sucrose-phosphate synthase/ transferase, transferring glycosyl groups
250801_at	AT5G04960	-5.64386	0.006362	pectinesterase family protein
246991_at	AT5G67400	-5.64386	0.006399	peroxidase 73 (PER73) (P73) (PRXR11)
266223_at	AT2G28790	-5.64386	8.1e-05	osmotin-like protein, putative
249927_at	AT5G19220	-5.64386	0.000151	APL1 (ADP GLUCOSE PYROPHOSPHORYLASE LARGE SUBUNIT 1); glucose-1-phosphate adenylyltransferase
262045_at	AT1G80240	-5.64386	0.003753	unknown protein
261562_at	AT1G01750	-5.64386	0.00281	ADF11 (ACTIN DEPOLYMERIZING FACTOR 11); actin binding
254718_at	AT4G13580	-5.64386	0.001629	disease resistance-responsive family protein
260077_at	AT1G73620	-5.64386	0.000435	thaumatin-like protein, putative / pathogenesis-related protein, putative
247304_at	AT5G63850	-5.64386	0.008543	AAP4; acidic amino acid transmembrane transporter/ amino acid transmembrane transporter/ neutral amino acid transmembrane transporter/ primary active transmembrane transporter
247091_at	AT5G66390	-5.05889	0.001718	peroxidase 72 (PER72) (P72) (PRXR8)
246601_at	AT1G31710	-5.05889	2.2e-05	copper amine oxidase, putative
247816_at	AT5G58260	-5.05889	0.001688	Encodes subunit NDH-N of NAD(P)H:plastoquinone dehydrogenase complex (Ndh complex) present in the thylakoid membrane of chloroplasts. This subunit is thought to be required for Ndh complex assembly.
248178_at	AT5G54370	-5.05889	0.010041	late embryogenesis abundant protein-related / LEA protein-related
253009_at	AT4G37930	-5.05889	0.007732	SHM1 (SERINE TRANSHYDROXYMETHYLTRANSFERASE 1); glycine hydroxymethyltransferase/ poly(U) binding
262612_at	AT1G14150	-5.05889	0.000414	oxygen evolving enhancer 3 (PsbQ) family protein
245944_at	AT5G19520	-5.05889	0.000483	MSL9 (MECHANOSENSITIVE CHANNEL OF SMALL CONDUCTANCE-LIKE 9); mechanically-gated ion channel
267497_at	AT2G30540	-5.05889	2.1e-05	glutaredoxin family protein
246195_at	AT4G36410	-5.05889	0.007122	UBC17 (UBIQUITIN-CONJUGATING ENZYME 17); small conjugating protein ligase/ ubiquitin-protein ligase
262175_at	AT1G74880	-5.05889	1.7e-05	NDH-O (NAD(P)H:plastoquinone dehydrogenase complex subunit O)
267121_at	AT2G23540	-5.05889	0.000216	GDSL-motif lipase/hydrolase family protein
254163_s_at	AT4G24340;AT4G24350	-5.05889	0.007727	[AT4G24340, phosphorylase family protein];[AT4G24350, phosphorylase family protein]
251885_at	AT3G54050	-5.05889	0.012696	fructose-1,6-bisphosphatase, putative / D-fructose-1,6-bisphosphate 1-phosphohydrolase, putative / FBPase, putative
262838_at	AT1G14960	-5.05889	0.000254	major latex protein-related / MLP-related
263437_at	AT2G28670	-5.05889	0.003422	disease resistance-responsive family protein / fibroin-related
253911_at	AT4G27300	-5.05889	0.000967	S-locus protein kinase, putative
252876_at	AT4G39970	-5.05889	0.002195	haloacid dehalogenase-like hydrolase family protein
252605_s_at	AT3G45070;AT3G45080	-5.05889	0.00166	[AT3G45070, sulfotransferase family protein];[AT3G45080, sulfotransferase family protein]
252543_at	AT3G45780	-5.05889	0.002051	PHOT1 (PHOTOTROPIN 1); FMN binding / blue light photoreceptor/ kinase/ protein binding / protein serine/threonine kinase
251784_at	AT3G55330	-5.05889	0.007748	PPL1 (PsbP-like protein 1); calcium ion binding
254474_at	AT4G20390	-5.05889	0.000805	integral membrane family protein
266322_at	AT2G46690	-5.05889	8.2e-05	auxin-responsive family protein
252269_at	AT3G49580	-5.05889	1.3e-05	LSU1 (RESPONSE TO LOW SULFUR 1)
252366_at	AT3G48420	-5.05889	0.000195	haloacid dehalogenase-like hydrolase family protein
248727_at	AT5G47990	-5.05889	0.003984	CYP705A5; oxygen binding / thalian-diol desaturase
265656_at	AT2G13820	-5.05889	0.00011	protease inhibitor/seed storage/lipid transfer protein (LTP) family protein
251155_at	AT3G63160	-5.05889	0.004498	unknown protein
252172_at	AT3G50640	-4.64386	0.000665	unknown protein
263979_at	AT2G42840	-4.64386	0.010868	PDF1 (PROTODERMAL FACTOR 1)
246701_at	AT5G28020	-4.64386	0.000285	CYSD2 (CYSTEINE SYNTHASE D2); catalytic/ cysteine synthase/ pyridoxal phosphate binding
261422_at	AT1G18730	-4.64386	0.001644	NDF6 (NDH DEPENDENT FLOW 6)
266979_at	AT2G39470	-4.64386	0.002078	PPL2 (PsbP-like protein 2); calcium ion binding
247478_at	AT5G62360	-4.64386	0.001576	invertase/pectin methylesterase inhibitor family protein
251218_at	AT3G62410	-4.64386	0.000328	CP12-2; protein binding
257938_at	AT3G19820	-4.64386	2.5e-05	DWF1 (DWARF 1); calmodulin binding / catalytic
263073_at	AT2G17500	-4.64386	0.013116	auxin efflux carrier family protein
256878_at	AT3G26460	-4.64386	0.000195	major latex protein-related / MLP-related
261428_at	AT1G18870	-4.64386	0.002335	ICS2 (ISOCHORISMATE SYNTHASE 2); isochorismate synthase
254363_at	AT4G22010	-4.64386	1.6e-05	sks4 (SKU5 Similar 4); copper ion binding / oxidoreductase
264404_at	AT2G25160	-4.64386	2.4e-05	CYP82F1; electron carrier/ heme binding / iron ion binding / monooxygenase/ oxygen binding
263350_at	AT2G13360	-4.64386	0.008081	AGT (ALANINE:GLYOXYLATE AMINOTRANSFERASE); alanine-glyoxylate transaminase/ serine-glyoxylate transaminase/ serine-pyruvate transaminase
263174_at	AT1G54040	-4.64386	0.009228	ESP (EPITHIOSPECIFIER PROTEIN); enzyme regulator
249812_at	AT5G23830	-4.64386	0.000138	MD-2-related lipid recognition domain-containing protein / ML domain-containing protein
252833_at	AT4G40090	-4.64386	0.005374	AGP3 (arabinogalactan-protein 3)
247645_at	AT5G60530	-4.64386	0.002513	late embryogenesis abundant protein-related / LEA protein-related
247814_at	AT5G58310	-4.64386	0.003557	MES18 (METHYL ESTERASE 18); hydrolase/ hydrolase, acting on ester bonds / methyl indole-3-acetate esterase
262658_at	AT1G14220	-4.64386	0.000441	ribonuclease T2 family protein
245689_at	AT5G04120	-4.64386	0.000225	phosphoglycerate/bisphosphoglycerate mutase family protein
263345_s_at	AT2G05070;AT2G05100	-4.64386	0.007399	[AT2G05070, LHCB2.2; chlorophyll binding];[AT2G05100, LHCB2.1; chlorophyll binding]
261793_at	AT1G16080	-4.64386	0.000227	unknown protein
249208_at	AT5G42650	-4.64386	0.001018	AOS (ALLENE OXIDE SYNTHASE); allene oxide synthase/ hydro-lyase/ oxygen binding
263227_at	AT1G30750	-4.64386	0.002434	unknown protein
256875_at	AT3G26330	-4.64386	2.7e-05	CYP71B37; electron carrier/ heme binding / iron ion binding / monooxygenase/ oxygen binding
260205_at	AT1G70700	-4.64386	0.006052	TIFY7
257365_x_at	AT2G26020	-4.64386	0.010179	PDF1.2b (plant defensin 1.2b)
257641_s_at	AT3G25760;AT3G25770	-4.64386	0.000659	[AT3G25760, AOC1 (ALLENE OXIDE CYCLASE 1); allene-oxide cyclase];[AT3G25770, AOC2 (ALLENE OXIDE CYCLASE 2); allene-oxide cyclase]
265053_at	AT1G52000	-4.64386	0.004749	jacalin lectin family protein
258055_at	AT3G16250	-4.64386	0.000855	NDF4 (NDH-DEPENDENT CYCLIC ELECTRON FLOW 1); electron carrier/ iron-sulfur cluster binding
248064_at	no_match	-4.64386	0.002368	no_match
262231_at	AT1G68740	-4.64386	4.4e-05	EXS family protein / ERD1/XPR1/SYG1 family protein
255645_at	AT4G00880	-4.64386	0.000182	auxin-responsive family protein
247477_at	AT5G62340	-4.64386	0.002245	invertase/pectin methylesterase inhibitor family protein
253743_at	AT4G28940	-4.64386	0.000158	catalytic
254384_at	AT4G21870	-4.64386	0.012496	26.5 kDa class P-related heat shock protein (HSP26.5-P)
260877_at	AT1G21500	-4.32193	0.000807	unknown protein
250778_at	AT5G05500	-4.32193	0.002633	pollen Ole e 1 allergen and extensin family protein
253957_at	AT4G26320	-4.32193	0.001304	AGP13 (arabinogalactan protein 13)
251298_at	AT3G62040	-4.32193	0.000142	catalytic/ hydrolase
250661_at	AT5G07030	-4.32193	0.00973	aspartic-type endopeptidase
246565_at	AT5G15530	-4.32193	0.002142	BCCP2 (BIOTIN CARBOXYL CARRIER PROTEIN 2); biotin binding
252730_at	AT3G43110	-4.32193	0.001463	unknown protein
248377_at	AT5G51720	-4.32193	0.004915	unknown protein
247212_at	AT5G65040	-4.32193	0.000612	senescence-associated protein-related
257701_at	AT3G12710	-4.32193	0.000576	methyladenine glycosylase family protein
255958_at	AT1G22150	-4.32193	0.002579	SULTR1;3; sulfate transmembrane transporter
264342_at	AT1G12080	-4.32193	0.000748	unknown protein
262309_at	AT1G70820	-4.32193	0.000207	phosphoglucomutase, putative / glucose phosphomutase, putative
245947_at	AT5G19530	-4.32193	4.2e-05	ACL5 (ACAULIS 5); spermine synthase/ thermospermine synthase
252954_at	AT4G38660	-4.32193	0.000317	thaumatin, putative
249588_at	AT5G37790	-4.32193	0.00289	protein kinase family protein
253582_at	AT4G30670	-4.32193	0.001981	unknown protein
245267_at	AT4G14060	-4.32193	0.000785	major latex protein-related / MLP-related
246562_at	AT5G15580	-4.32193	0.003415	LNG1 (LONGIFOLIA1)
267389_at	AT2G44460	-4.32193	0.001734	BGLU28 (BETA GLUCOSIDASE 28); catalytic/ cation binding / hydrolase, hydrolyzing O-glycosyl compounds
246884_at	AT5G26220	-4.32193	0.000178	ChaC-like family protein
259388_at	AT1G13420	-4.32193	0.000754	ST4B (SULFOTRANSFERASE 4B); brassinosteroid sulfotransferase/ sulfotransferase
258751_at	AT3G05890	-4.32193	0.000132	RCI2B (RARE-COLD-INDUCIBLE 2B)
253753_at	AT4G29030	-4.32193	1.1e-05	glycine-rich protein
266279_at	AT2G29290	-4.32193	0.000855	tropinone reductase, putative / tropine dehydrogenase, putative
251668_at	AT3G57010	-4.32193	0.002175	strictosidine synthase family protein
252635_at	AT3G44510	-4.32193	1.1e-05	FUNCTIONS IN: molecular_function unknown; INVOLVED IN: biological_process unknown; LOCATED IN: cellular_component unknown; EXPRESSED IN: inflorescence meristem, root; BEST Arabidopsis thaliana protein match is: esterase/lipase/thioesterase family protein (TAIR:AT1G08310.2); Has 177 Blast hits to 176 proteins in 15 species: Archae - 0; Bacteria - 10; Metazoa - 0; Fungi - 0; Plants - 167; Viruses -…
265102_at	AT1G30870	-4.32193	0.00284	cationic peroxidase, putative
261985_at	AT1G33750	-4.32193	0.000394	terpene synthase/cyclase family protein
247634_at	AT5G60520	-4.32193	0.001189	late embryogenesis abundant protein-related / LEA protein-related
245736_at	AT1G73330	-4.32193	0.010172	ATDR4; peptidase inhibitor
250471_at	AT5G10170	-4.32193	0.001212	MIPS3 (MYO-INOSITOL-1-PHOSTPATE SYNTHASE 3); binding / catalytic/ inositol-3-phosphate synthase
262105_at	AT1G02810	-4.32193	8e-05	pectinesterase family protein
254743_at	AT4G13420	-4.32193	0.001399	HAK5 (HIGH AFFINITY K+ TRANSPORTER 5); potassium ion transmembrane transporter/ potassium:sodium symporter
255751_at	AT1G31950	-4.32193	0.000215	terpene synthase/cyclase family protein
247463_at	AT5G62210	-4.32193	5e-06	embryo-specific protein-related
254783_at	AT4G12830	-4.32193	0.001817	hydrolase, alpha/beta fold family protein
250257_at	AT5G13770	-4.32193	0.000799	pentatricopeptide (PPR) repeat-containing protein
256796_at	AT3G22210	-4.32193	0.001169	unknown protein
249686_at	AT5G36140	-4.32193	0.003242	CYP716A2; electron carrier/ heme binding / iron ion binding / monooxygenase
247765_at	no_match	-4.32193	0.000653	no_match
250541_at	AT5G09520	-4.32193	0.001697	hydroxyproline-rich glycoprotein family protein
246159_at	AT5G20935	-4.32193	0.000331	unknown protein
247352_at	AT5G63650	-4.32193	9.3e-05	SNRK2.5 (SNF1-RELATED PROTEIN KINASE 2.5); kinase
261425_at	AT1G18880	-4.32193	0.003479	proton-dependent oligopeptide transport (POT) family protein
244936_at	ATCG01100	-4.32193	0.001017	NADH dehydrogenase ND1
258929_at	AT3G10060	-4.32193	0.003419	immunophilin, putative / FKBP-type peptidyl-prolyl cis-trans isomerase, putative
249718_at	AT5G35740	-4.32193	0.00151	glycosyl hydrolase family protein 17
262878_at	AT1G64770	-4.32193	0.007185	NDF2 (NDH-DEPENDENT CYCLIC ELECTRON FLOW 1); carbohydrate binding / catalytic
253024_at	AT4G38080	-4.32193	0.00237	hydroxyproline-rich glycoprotein family protein
250075_at	AT5G17670	-4.32193	0.005606	hydrolase, acting on ester bonds
258145_at	AT3G18200	-4.32193	0.008728	nodulin MtN21 family protein
260704_at	AT1G32470	-4.05889	0.002287	glycine cleavage system H protein, mitochondrial, putative
264394_at	AT1G11860	-4.05889	0.007622	aminomethyltransferase, putative
254233_at	AT4G23800	-4.05889	0.000221	high mobility group (HMG1/2) family protein
260831_at	AT1G06830	-4.05889	0.000974	glutaredoxin family protein
257244_at	AT3G24240	-4.05889	0.007849	leucine-rich repeat transmembrane protein kinase, putative
256617_at	AT3G22240	-4.05889	0.000445	unknown protein
253860_at	AT4G27700	-4.05889	0.001205	rhodanese-like domain-containing protein
250794_at	AT5G05270	-4.05889	0.00204	chalcone-flavanone isomerase family protein
245399_at	AT4G17340	-4.05889	0.008256	TIP2;2 (TONOPLAST INTRINSIC PROTEIN 2;2); water channel
264988_at	AT1G27140	-4.05889	0.003449	ATGSTU14 (ARABIDOPSIS THALIANA GLUTATHIONE S-TRANSFERASE TAU 14); glutathione transferase
245015_at	ATCG00490	-4.05889	0.000385	large subunit of RUBISCO. Protein is tyrosine-phosphorylated and its phosphorylation state is modulated in response to ABA in Arabidopsis thaliana seeds.
265025_at	AT1G24575	-4.05889	0.001129	unknown protein
248652_at	AT5G49270	-4.05889	0.003042	SHV2 (SHAVEN 2)
249658_s_at	AT5G36790;AT5G36700	-4.05889	0.004033	[AT5G36790, phosphoglycolate phosphatase, putative];[AT5G36700, PGLP1 (2-PHOSPHOGLYCOLATE PHOSPHATASE 1); phosphoglycolate phosphatase]
262260_at	AT1G70850	-4.05889	0.001975	MLP34 (MLP-LIKE PROTEIN 34)
253387_at	AT4G33010	-4.05889	0.00441	AtGLDP1 (Arabidopsis thaliana glycine decarboxylase P-protein 1); catalytic/ glycine dehydrogenase (decarboxylating)/ pyridoxal phosphate binding
257533_at	AT3G10840	-4.05889	0.000227	hydrolase, alpha/beta fold family protein
259291_at	AT3G11550	-4.05889	0.000598	integral membrane family protein
247586_at	AT5G60660	-4.05889	0.009979	PIP2;4 (PLASMA MEMBRANE INTRINSIC PROTEIN 2;4); water channel
250820_at	AT5G05160	-4.05889	0.001527	leucine-rich repeat transmembrane protein kinase, putative
245305_at	AT4G17215	-4.05889	0.004133	unknown protein
248074_at	AT5G55730	-4.05889	0.000489	FLA1 (FASCICLIN-LIKE ARAB INOGALACTAN 1)
260130_s_at	AT1G66280;AT1G66270	-4.05889	0.000441	[AT1G66280, BGLU22; catalytic/ cation binding / hydrolase, hydrolyzing O-glycosyl compounds];[AT1G66270, BGLU21; catalytic/ cation binding / hydrolase, hydrolyzing O-glycosyl compounds]
249073_at	AT5G44020	-4.05889	0.000267	acid phosphatase class B family protein
254938_at	AT4G10770	-4.05889	0.005747	OPT7 (OLIGOPEPTIDE TRANSPORTER 7); oligopeptide transporter
258495_at	AT3G02690	-4.05889	0.00044	integral membrane family protein
262349_at	AT2G48130	-4.05889	0.001081	protease inhibitor/seed storage/lipid transfer protein (LTP) family protein
266978_at	AT2G39430	-4.05889	0.005624	disease resistance-responsive protein-related / dirigent protein-related
252411_at	AT3G47430	-4.05889	0.002465	PEX11B
267262_at	AT2G22990	-4.05889	0.009472	SNG1 (SINAPOYLGLUCOSE 1); serine-type carboxypeptidase/ sinapoylglucose-malate O-sinapoyltransferase
247977_at	AT5G56850	-4.05889	0.009383	unknown protein
258745_at	AT3G05920	-4.05889	0.007583	heavy-metal-associated domain-containing protein
253515_at	AT4G31320	-4.05889	0.008473	auxin-responsive protein, putative / small auxin up RNA (SAUR_C)
246063_at	AT5G19340	-4.05889	0.000944	unknown protein
257041_at	no_match	-4.05889	0.001412	no_match
251857_at	AT3G54770	-4.05889	0.003399	RNA recognition motif (RRM)-containing protein
250437_at	AT5G10430	-3.8365	0.011355	AGP4 (ARABINOGALACTAN PROTEIN 4)
265547_at	AT2G28305	-3.8365	0.006096	unknown protein
256560_s_at	AT3G31415;AT3G32030	-3.8365	0.001709	[AT3G31415, terpene synthase/cyclase family protein];[AT3G32030, terpene synthase/cyclase family protein]
256542_at	AT1G42550	-3.8365	0.000803	PMI1 (PLASTID MOVEMENT IMPAIRED1)
255689_at	no_match	-3.8365	0.000193	no_match
253421_at	AT4G32340	-3.8365	0.000361	EXPRESSED IN: 22 plant structures; EXPRESSED DURING: 13 growth stages; BEST Arabidopsis thaliana protein match is: binding (TAIR:AT1G80130.1); Has 2680 Blast hits to 1282 proteins in 184 species: Archae - 2; Bacteria - 433; Metazoa - 1247; Fungi - 71; Plants - 657; Viruses - 13; Other Eukaryotes - 257 (source: NCBI BLink).
253522_at	AT4G31290	-3.8365	0.007001	ChaC-like family protein
266329_at	AT2G01590	-3.8365	0.004723	CRR3 (CHLORORESPIRATORY REDUCTION 3)
253305_at	AT4G33666	-3.8365	0.00191	unknown protein
247549_at	AT5G61420	-3.8365	0.004351	MYB28 (myb domain protein 28); DNA binding / transcription factor
263552_x_at	AT2G24980	-3.8365	0.002557	proline-rich extensin-like family protein
245463_at	AT4G17030	-3.8365	0.002531	ATEXLB1 (ARABIDOPSIS THALIANA EXPANSIN-LIKE B1)
266118_at	AT2G02130	-3.8365	0.000623	LCR68 (LOW-MOLECULAR-WEIGHT CYSTEINE-RICH 68); peptidase inhibitor
249061_at	AT5G44550	-3.8365	0.002206	integral membrane family protein
263595_at	AT2G01890	-3.8365	0.001035	PAP8 (PURPLE ACID PHOSPHATASE 8); acid phosphatase/ protein serine/threonine phosphatase
262434_at	AT1G47670	-3.8365	0.000333	amino acid transporter family protein
261868_s_at	AT1G11450;AT1G11460	-3.8365	4e-06	[AT1G11450, nodulin MtN21 family protein];[AT1G11460, nodulin MtN21 family protein]
266766_at	AT2G46880	-3.8365	0.002211	PAP14 (PURPLE ACID PHOSPHATASE 14); acid phosphatase/ protein serine/threonine phosphatase
266656_at	AT2G25900	-3.8365	0.009625	ATCTH; transcription factor
252181_at	AT3G50685	-3.8365	0.000338	unknown protein
259328_at	AT3G16440	-3.8365	0.003776	ATMLP-300B (MYROSINASE-BINDING PROTEIN-LIKE PROTEIN-300B)
249876_at	AT5G23060	-3.8365	0.000415	CaS (Calcium sensing receptor)
263761_at	AT2G21330	-3.8365	0.006255	fructose-bisphosphate aldolase, putative
266356_at	AT2G32300	-3.8365	0.002429	UCC1 (UCLACYANIN 1); copper ion binding / electron carrier
248252_at	AT5G53250	-3.8365	0.000406	AGP22 (ARABINOGALACTAN PROTEIN 22)
252594_at	AT3G45680	-3.8365	0.001574	proton-dependent oligopeptide transport (POT) family protein
251996_at	AT3G52840	-3.8365	0.000581	BGAL2 (beta-galactosidase 2); beta-galactosidase/ catalytic/ cation binding
245007_at	ATCG00350	-3.8365	0.002092	Encodes psaA protein comprising the reaction center for photosystem I along with psaB protein; hydrophobic protein encoded by the chloroplast genome.
262317_at	AT2G48140	-3.8365	0.00108	EDA4 (embryo sac development arrest 4); lipid binding
249576_at	AT5G37690	-3.8365	0.000908	GDSL-motif lipase/hydrolase family protein
252412_at	AT3G47295	-3.8365	3.1e-05	unknown protein
255331_at	AT4G04330	-3.8365	0.001553	unknown protein
260950_s_at	AT1G06120;AT1G06090	-3.8365	0.002434	[AT1G06120, fatty acid desaturase family protein];[AT1G06090, fatty acid desaturase family protein]
266460_at	AT2G47930	-3.8365	0.000526	AGP26 (ARABINOGALACTAN PROTEIN 26)
250764_at	AT5G05960	-3.8365	0.000904	protease inhibitor/seed storage/lipid transfer protein (LTP) family protein
265250_at	AT2G01950	-3.64386	4.8e-05	BRL2 (BRI1-LIKE 2); ATP binding / protein serine/threonine kinase/ transmembrane receptor protein serine/threonine kinase
254250_at	AT4G23290	-3.64386	0.00611	protein kinase family protein
253786_at	AT4G28650	-3.64386	8.8e-05	leucine-rich repeat transmembrane protein kinase, putative
266625_at	AT2G35380	-3.64386	0.002216	peroxidase 20 (PER20) (P20)
263142_at	AT1G65230	-3.64386	0.000976	unknown protein
261931_at	AT1G22430	-3.64386	0.000755	alcohol dehydrogenase, putative
260070_at	AT1G73830	-3.64386	0.005405	BEE3 (BR ENHANCED EXPRESSION 3); DNA binding / transcription factor
265699_at	AT2G03550	-3.64386	0.000304	hydrolase
250224_at	AT5G14150	-3.64386	0.000147	unknown protein
245346_at	AT4G17090	-3.64386	0.000106	CT-BMY (CHLOROPLAST BETA-AMYLASE); beta-amylase
257800_at	AT3G15900	-3.64386	0.000301	unknown protein
256076_at	AT1G18060	-3.64386	0.000782	unknown protein
261090_at	AT1G07560	-3.64386	0.001272	leucine-rich repeat protein kinase, putative
267287_at	AT2G23630	-3.64386	0.001988	sks16 (SKU5 Similar 16); copper ion binding / pectinesterase
250007_at	AT5G18670	-3.64386	0.003002	BMY3; beta-amylase/ catalytic/ cation binding
249378_at	AT5G40450	-3.64386	0.002934	unknown protein
258025_at	AT3G19480	-3.64386	0.001366	D-3-phosphoglycerate dehydrogenase, putative / 3-PGDH, putative
251360_at	AT3G61210	-3.64386	0.000268	embryo-abundant protein-related
249230_at	AT5G42070	-3.64386	0.003192	unknown protein
247600_at	AT5G60890	-3.64386	0.004097	MYB34 (MYB DOMAIN PROTEIN 34); DNA binding / kinase/ transcription activator/ transcription factor
245193_at	AT1G67810	-3.64386	0.003972	SUFE2 (SULFUR E 2); enzyme activator
259943_at	AT1G71480	-3.64386	0.000424	nuclear transport factor 2 (NTF2) family protein
264052_at	AT2G22330	-3.64386	0.002032	CYP79B3; electron carrier/ heme binding / iron ion binding / monooxygenase/ oxygen binding
267595_at	AT2G32990	-3.64386	0.001319	AtGH9B8 (Arabidopsis thaliana glycosyl hydrolase 9B8); catalytic/ hydrolase, hydrolyzing O-glycosyl compounds
266636_at	AT2G35370	-3.64386	0.006335	GDCH; glycine dehydrogenase (decarboxylating)
263632_at	AT2G04795	-3.64386	0.001179	unknown protein
250145_at	AT5G14690	-3.64386	0.000221	unknown protein
261999_at	AT1G33800	-3.64386	0.001248	unknown protein
265967_at	AT2G37450	-3.64386	0.001455	nodulin MtN21 family protein
249195_s_at	AT5G42500;AT5G42510	-3.64386	0.001212	[AT5G42500, disease resistance-responsive family protein];[AT5G42510, disease resistance-responsive family protein]
254122_at	AT4G24510	-3.64386	0.004791	CER2 (ECERIFERUM 2); transferase/ transferase, transferring acyl groups other than amino-acyl groups
259431_at	AT1G01620	-3.64386	0.00329	PIP1C (PLASMA MEMBRANE INTRINSIC PROTEIN 1C); water channel
261772_at	AT1G76240	-3.64386	0.003755	unknown protein
249867_at	AT5G23020	-3.64386	0.00887	IMS2 (2-ISOPROPYLMALATE SYNTHASE 2); 2-isopropylmalate synthase/ methylthioalkylmalate synthase
266300_at	AT2G01420	-3.64386	0.009192	PIN4 (PIN-FORMED 4); auxin:hydrogen symporter/ transporter
246652_at	AT5G35190	-3.64386	0.002235	proline-rich extensin-like family protein
263795_at	AT2G24610	-3.64386	0.001137	ATCNGC14; calmodulin binding / cyclic nucleotide binding / ion channel
246371_at	AT1G51940	-3.64386	3.1e-05	protein kinase family protein / peptidoglycan-binding LysM domain-containing protein
266588_at	AT2G14890	-3.64386	0.003298	AGP9 (ARABINOGALACTAN PROTEIN 9)
266899_at	AT2G34620	-3.47393	0.001792	mitochondrial transcription termination factor-related / mTERF-related
258537_at	AT3G04210	-3.47393	0.001365	disease resistance protein (TIR-NBS class), putative
250960_at	AT5G02940	-3.47393	0.002566	LOCATED IN: chloroplast, chloroplast envelope; EXPRESSED IN: 21 plant structures; EXPRESSED DURING: 13 growth stages; CONTAINS InterPro DOMAIN/s: Protein of unknown function DUF1012 (InterPro:IPR010420); BEST Arabidopsis thaliana protein match is: phosphotransferase-related (TAIR:AT5G43745.1); Has 255 Blast hits to 252 proteins in 33 species: Archae - 0; Bacteria - 23; Metazoa - 0; Fungi - 0; Pla…
245745_at	AT1G51110	-3.47393	0.000745	plastid-lipid associated protein PAP / fibrillin family protein
256336_at	AT1G72030	-3.47393	0.013186	GCN5-related N-acetyltransferase (GNAT) family protein
253496_at	AT4G31870	-3.47393	0.002905	ATGPX7 (glutathione peroxidase 7); glutathione peroxidase
258080_at	AT3G25930	-3.47393	0.000216	universal stress protein (USP) family protein
262582_at	AT1G15410	-3.47393	5e-06	aspartate-glutamate racemase family
265511_at	AT2G05540	-3.47393	0.000903	glycine-rich protein
258757_at	AT3G10912;AT3G10910	-3.47393	0.000858	[AT3G10912, CPuORF63 (Conserved peptide upstream open reading frame 63)];[AT3G10910, zinc finger (C3HC4-type RING finger) family protein]
245304_at	AT4G15630	-3.47393	0.000675	integral membrane family protein
266920_at	AT2G45750	-3.47393	0.000659	dehydration-responsive family protein
262131_at	AT1G02900	-3.47393	0.005219	RALF1 (RAPID ALKALINIZATION FACTOR 1); signal transducer
246860_at	AT5G25840	-3.47393	0.001965	unknown protein
254153_at	AT4G24450	-3.47393	0.001652	PWD (PHOSPHOGLUCAN, WATER DIKINASE); ATP binding / kinase
260969_at	AT1G12240	-3.47393	0.000835	ATBETAFRUCT4; beta-fructofuranosidase/ hydrolase, hydrolyzing O-glycosyl compounds
249011_at	AT5G44670	-3.47393	0.000455	unknown protein
247357_at	AT5G63710	-3.47393	0.001859	leucine-rich repeat transmembrane protein kinase, putative
244994_at	ATCG01010	-3.47393	0.000926	Chloroplast encoded NADH dehydrogenase unit.
267645_at	AT2G32860	-3.47393	4.3e-05	BGLU33 (BETA GLUCOSIDASE 33); catalytic/ cation binding / hydrolase, hydrolyzing O-glycosyl compounds
254430_at	AT4G20820	-3.47393	0.000966	FAD-binding domain-containing protein
262232_at	AT1G68600	-3.47393	0.001613	unknown protein
264029_at	AT2G03720	-3.47393	0.0094	MRH6 (morphogenesis of root hair 6)
245215_at	AT1G67830	-3.47393	0.007706	ATFXG1 (alpha-fucosidase 1); alpha-L-fucosidase/ carboxylesterase
249375_at	AT5G40730	-3.47393	0.000304	AGP24
251843_x_at	AT3G54590	-3.47393	0.005952	ATHRGP1 (HYDROXYPROLINE-RICH GLYCOPROTEIN); structural constituent of cell wall
248242_at	AT5G53580	-3.47393	0.009534	aldo/keto reductase family protein
252425_at	AT3G47620	-3.47393	0.00042	AtTCP14 (TEOSINTE BRANCHED1, CYCLOIDEA and PCF (TCP) 14); transcription factor
246861_at	AT5G25890	-3.47393	0.001538	IAA28 (INDOLE-3-ACETIC ACID INDUCIBLE 28); transcription factor
244935_at	ATCG01090	-3.47393	0.002067	Encodes subunit of the chloroplast NAD(P)H dehydrogenase complex
250682_x_at	AT5G06630	-3.47393	0.002731	proline-rich extensin-like family protein
260234_at	AT1G74460	-3.47393	0.008309	GDSL-motif lipase/hydrolase family protein
258222_at	AT3G15680	-3.47393	0.003542	zinc finger (Ran-binding) family protein
245139_at	AT2G45430	-3.47393	0.006976	DNA-binding protein-related
250239_at	AT5G13580	-3.47393	0.001324	ABC transporter family protein
249979_s_at	AT5G18860;AT5G18890	-3.47393	0.002592	[AT5G18860, inosine-uridine preferring nucleoside hydrolase family protein];[AT5G18890, inosine-uridine preferring nucleoside hydrolase family protein]
264893_at	AT1G23140	-3.47393	0.003108	C2 domain-containing protein
253480_at	AT4G31840	-3.47393	0.001187	plastocyanin-like domain-containing protein
249435_at	AT5G39970	-3.47393	0.000591	catalytic
256754_at	AT3G25690	-3.47393	0.001279	CHUP1 (CHLOROPLAST UNUSUAL POSITIONING 1)
261958_at	AT1G64500	-3.47393	0.007338	glutaredoxin family protein
266526_at	AT2G16980	-3.47393	0.001749	tetracycline transporter
250649_at	AT5G06690	-3.47393	0.000119	WCRKC1 (WCRKC THIOREDOXIN 1)
266336_at	AT2G32270	-3.47393	0.00112	ZIP3; zinc ion transmembrane transporter
257761_at	AT3G23090	-3.47393	0.001009	FUNCTIONS IN: molecular_function unknown; INVOLVED IN: biological_process unknown; LOCATED IN: cellular_component unknown; EXPRESSED IN: inflorescence meristem, leaf apex, hypocotyl, flower, root; EXPRESSED DURING: petal differentiation and expansion stage; CONTAINS InterPro DOMAIN/s: Targeting for Xklp2 (InterPro:IPR009675); BEST Arabidopsis thaliana protein match is: WDL1 (TAIR:AT3G04630.3); Ha…
260941_at	AT1G44970	-3.47393	0.000647	peroxidase, putative
257080_at	AT3G15240	-3.47393	6.2e-05	unknown protein
266326_at	AT2G46650	-3.47393	7e-05	CB5-C (CYTOCHROME B5 ISOFORM C); heme binding
253182_at	AT4G35190	-3.47393	0.003982	unknown protein
252922_at	AT4G39040	-3.47393	2e-05	RNA binding
258397_at	AT3G15357	-3.47393	0.002978	unknown protein
255878_at	AT2G40620	-3.32193	0.00028	bZIP transcription factor family protein
251856_at	AT3G54720	-3.32193	0.000993	AMP1 (ALTERED MERISTEM PROGRAM 1); carboxypeptidase/ dipeptidase
255284_at	AT4G04610	-3.32193	0.006878	APR1 (APS REDUCTASE 1); adenylyl-sulfate reductase
251658_at	AT3G57020	-3.32193	0.001956	strictosidine synthase family protein
250255_at	AT5G13730	-3.32193	0.002121	SIG4 (SIGMA FACTOR 4); DNA binding / DNA-directed RNA polymerase/ sigma factor/ transcription factor
248427_at	AT5G51750	-3.32193	0.001672	ATSBT1.3 (ARABIDOPSIS THALIANA SUBTILASE 1.3); identical protein binding / serine-type endopeptidase
245744_at	AT1G51110	-3.32193	0.002425	plastid-lipid associated protein PAP / fibrillin family protein
251722_at	AT3G56200	-3.32193	0.006623	amino acid transporter family protein
252183_at	AT3G50740	-3.32193	0.002952	UGT72E1 (UDP-glucosyl transferase 72E1); UDP-glycosyltransferase/ coniferyl-alcohol glucosyltransferase/ transferase, transferring glycosyl groups
245412_at	AT4G17280	-3.32193	0.000884	INVOLVED IN: multicellular organismal development; LOCATED IN: membrane; EXPRESSED IN: 11 plant structures; EXPRESSED DURING: 6 growth stages; CONTAINS InterPro DOMAIN/s: Uncharacterised conserved protein UCP037471 (InterPro:IPR017214), Protein of unknown function DUF568, DOMON-like (InterPro:IPR007613), DOMON related (InterPro:IPR005018), Cytochrome b561/ferric reductase transmembrane (InterPro:…
248793_at	AT5G47240	-3.32193	0.008737	atnudt8 (Arabidopsis thaliana Nudix hydrolase homolog 8); hydrolase
250100_at	AT5G16570	-3.32193	8.6e-05	GLN1;4; glutamate-ammonia ligase
246390_at	AT1G77330	-3.32193	0.000331	1-aminocyclopropane-1-carboxylate oxidase, putative / ACC oxidase, putative
262728_at	AT1G75820	-3.32193	0.008507	CLV1 (CLAVATA 1); ATP binding / kinase/ protein serine/threonine kinase/ receptor signaling protein serine/threonine kinase
252853_at	AT4G39710	-3.32193	0.000605	immunophilin, putative / FKBP-type peptidyl-prolyl cis-trans isomerase, putative
252636_at	AT3G44510	-3.32193	0.001228	FUNCTIONS IN: molecular_function unknown; INVOLVED IN: biological_process unknown; LOCATED IN: cellular_component unknown; EXPRESSED IN: inflorescence meristem, root; BEST Arabidopsis thaliana protein match is: esterase/lipase/thioesterase family protein (TAIR:AT1G08310.2); Has 177 Blast hits to 176 proteins in 15 species: Archae - 0; Bacteria - 10; Metazoa - 0; Fungi - 0; Plants - 167; Viruses -…
249469_at	AT5G39320	-3.32193	0.008482	UDP-glucose 6-dehydrogenase, putative
262230_at	AT1G68560	-3.32193	0.000294	XYL1 (ALPHA-XYLOSIDASE 1); alpha-N-arabinofuranosidase/ hydrolase, hydrolyzing O-glycosyl compounds / xylan 1,4-beta-xylosidase
247947_at	AT5G57090	-3.32193	0.000262	EIR1 (ETHYLENE INSENSITIVE ROOT 1); auxin efflux transmembrane transporter/ auxin:hydrogen symporter/ transporter
266125_at	AT2G45050	-3.32193	0.012585	zinc finger (GATA type) family protein
258497_at	AT3G02380	-3.32193	0.008802	COL2 (constans-like 2); transcription factor/ zinc ion binding
244972_at	ATCG00680	-3.32193	0.006791	encodes for CP47, subunit of the photosystem II reaction center.
248728_at	AT5G48000	-3.32193	0.002385	CYP708A2; oxygen binding / thalianol hydroxylase
248729_at	AT5G48010	-3.32193	0.000181	THAS1 (THALIANOL SYNTHASE 1); catalytic/ thalianol synthase
256099_at	AT1G13710	-3.32193	0.008207	CYP78A5; electron carrier/ heme binding / iron ion binding / monooxygenase/ oxygen binding
259871_at	AT1G76800	-3.32193	0.001672	nodulin, putative
263477_at	AT2G31790	-3.32193	0.007909	UDP-glucoronosyl/UDP-glucosyl transferase family protein
256217_at	AT1G56320	-3.32193	0.002574	unknown protein
258736_at	AT3G05900	-3.32193	8.9e-05	neurofilament protein-related
267057_at	AT2G32500	-3.32193	0.013206	FUNCTIONS IN: molecular_function unknown; INVOLVED IN: biological_process unknown; EXPRESSED IN: 23 plant structures; EXPRESSED DURING: 13 growth stages; CONTAINS InterPro DOMAIN/s: Stress responsive alpha-beta barrel (InterPro:IPR013097), Dimeric alpha-beta barrel (InterPro:IPR011008); BEST Arabidopsis thaliana protein match is: unknown protein (TAIR:AT2G31670.1); Has 36 Blast hits to 33 protein…
253849_at	AT4G28080	-3.32193	0.01052	binding
252692_at	AT3G43960	-3.32193	0.007694	cysteine proteinase, putative
260582_at	AT2G47200	-3.32193	0.000203	unknown protein
257673_at	AT3G20370	-3.32193	0.010739	meprin and TRAF homology domain-containing protein / MATH domain-containing protein
255298_at	AT4G04840	-3.32193	0.000167	methionine sulfoxide reductase domain-containing protein / SeIR domain-containing protein
252272_at	AT3G49670	-3.32193	0.005793	BAM2 (BARELY ANY MERISTEM 2); ATP binding / protein binding / protein kinase/ protein serine/threonine kinase
251143_at	AT5G01220	-3.32193	0.007838	SQD2 (sulfoquinovosyldiacylglycerol 2); UDP-glycosyltransferase/ UDP-sulfoquinovose:DAG sulfoquinovosyltransferase/ transferase, transferring glycosyl groups
245602_at	AT4G14270	-3.32193	0.00022	Protein containing PAM2 motif which mediates interaction with the PABC domain of polyadenyl binding proteins.
264204_at	AT1G22710	-3.32193	0.005623	SUC2 (SUCROSE-PROTON SYMPORTER 2); carbohydrate transmembrane transporter/ sucrose transmembrane transporter/ sucrose:hydrogen symporter/ sugar:hydrogen symporter
266307_at	AT2G27000	-3.32193	0.000151	CYP705A8; electron carrier/ heme binding / iron ion binding / monooxygenase/ oxygen binding
260753_at	AT1G49230	-3.32193	0.001212	zinc finger (C3HC4-type RING finger) family protein
247965_at	AT5G56540	-3.32193	0.00143	AGP14 (ARABINOGALACTAN PROTEIN 14)
261084_at	AT1G07440	-3.32193	0.0023	tropinone reductase, putative / tropine dehydrogenase, putative
258122_at	AT3G14570	-3.32193	0.000699	ATGSL04 (glucan synthase-like 4); 1,3-beta-glucan synthase/ transferase, transferring glycosyl groups
256892_at	AT3G19000	-3.32193	0.003166	oxidoreductase, 2OG-Fe(II) oxygenase family protein
249710_at	AT5G35630	-3.32193	0.006229	GS2 (GLUTAMINE SYNTHETASE 2); glutamate-ammonia ligase
248626_at	AT5G48940	-3.32193	1e-05	leucine-rich repeat transmembrane protein kinase, putative
252463_at	AT3G47070	-3.32193	0.000763	unknown protein
249242_at	AT5G42250	-3.32193	5.7e-05	alcohol dehydrogenase, putative
260527_at	AT2G47270	-3.18442	0.010941	transcription factor/ transcription regulator
249327_at	AT5G40890	-3.18442	0.00029	ATCLC-A (CHLORIDE CHANNEL A); anion channel/ nitrate transmembrane transporter/ voltage-gated chloride channel
258421_at	AT3G16690	-3.18442	0.000534	nodulin MtN3 family protein
266838_at	AT2G25980	-3.18442	5.6e-05	jacalin lectin family protein
260696_at	AT1G32520	-3.18442	0.005582	unknown protein
259179_at	AT3G01660	-3.18442	0.004127	methyltransferase
266917_at	AT2G45830	-3.18442	0.001226	DTA2 (DOWNSTREAM TARGET OF AGL15 2)
244966_at	ATCG00600	-3.18442	0.000839	Cytochrome b6-f complex, subunit V. Disruption of homologous gene in Chlamydomonas results in disruption of cytochrome b6-f complex.
249472_at	AT5G39210	-3.18442	0.005547	CRR7 (CHLORORESPIRATORY REDUCTION 7)
245172_at	AT2G47540	-3.18442	0.007667	pollen Ole e 1 allergen and extensin family protein
250723_at	AT5G06300	-3.18442	0.000646	carboxy-lyase
261603_at	AT1G49600	-3.18442	0.001443	ATRBP47A (Arabidopsis thaliana RNA-binding protein 47a); RNA binding
252870_at	AT4G39940	-3.18442	0.001765	AKN2 (APS-kinase 2); ATP binding / adenylylsulfate kinase/ kinase/ transferase, transferring phosphorus-containing groups
259076_at	AT3G02140	-3.18442	0.001423	TMAC2 (TWO OR MORE ABRES-CONTAINING GENE 2)
261893_at	AT1G80690	-3.18442	0.000658	unknown protein
256631_at	AT3G28320	-3.18442	0.00069	FUNCTIONS IN: molecular_function unknown; INVOLVED IN: biological_process unknown; LOCATED IN: cellular_component unknown; CONTAINS InterPro DOMAIN/s: Protein of unknown function DUF677 (InterPro:IPR007749); BEST Arabidopsis thaliana protein match is: AT14A (TAIR:AT3G28300.1); Has 84 Blast hits to 84 proteins in 12 species: Archae - 0; Bacteria - 8; Metazoa - 0; Fungi - 0; Plants - 69; Viruses - …
267596_s_at	AT2G33060;AT2G33050	-3.18442	0.004513	[AT2G33060, AtRLP27 (Receptor Like Protein 27); kinase/ protein binding];[AT2G33050, AtRLP26 (Receptor Like Protein 26); kinase/ protein binding]
250663_at	AT5G07110	-3.18442	0.000564	PRA1.B6 (PRENYLATED RAB ACCEPTOR 1.B6)
254037_at	AT4G25760	-3.18442	0.001045	AtGDU2 (Arabidopsis thaliana GLUTAMINE DUMPER 2)
261640_at	AT1G49960	-3.18442	0.004027	xanthine/uracil permease family protein
261464_at	AT1G07740;AT1G07730	-3.18442	0.005587	[AT1G07740, pentatricopeptide (PPR) repeat-containing protein];[AT1G07730, disease resistance-responsive family protein]
260542_at	AT2G43560	-3.18442	0.000166	immunophilin / FKBP-type peptidyl-prolyl cis-trans isomerase family protein
248684_at	AT5G48485	-3.18442	0.000648	DIR1 (DEFECTIVE IN INDUCED RESISTANCE 1); lipid binding / lipid transporter
245800_at	AT1G46264	-3.18442	8.3e-05	AT-HSFB4; DNA binding / transcription factor
248003_at	AT5G56220	-3.18442	4.9e-05	nucleoside-triphosphatase/ nucleotide binding
263750_at	no_match	-3.18442	0.000279	no_match
252092_at	AT3G51420	-3.18442	0.000977	SSL4 (STRICTOSIDINE SYNTHASE-LIKE 4); strictosidine synthase
262324_at	AT1G64170	-3.18442	0.001116	ATCHX16 (CATION/H+ EXCHANGER 16); monovalent cation:proton antiporter/ sodium:hydrogen antiporter
263998_at	AT2G22510	-3.18442	0.00784	hydroxyproline-rich glycoprotein family protein
250214_at	AT5G13870	-3.18442	0.007339	EXGT-A4 (ENDOXYLOGLUCAN TRANSFERASE A4); hydrolase, acting on glycosyl bonds / hydrolase, hydrolyzing O-glycosyl compounds / xyloglucan:xyloglucosyl transferase
265342_at	AT2G18300	-3.18442	0.00248	basic helix-loop-helix (bHLH) family protein
258607_at	AT3G02730	-3.18442	0.001696	TRXF1 (THIOREDOXIN F-TYPE 1); enzyme activator
252130_at	AT3G50820	-3.18442	0.003646	PSBO2 (PHOTOSYSTEM II SUBUNIT O-2); oxygen evolving/ poly(U) binding
256057_at	AT1G07180	-3.18442	0.00584	NDA1 (ALTERNATIVE NAD(P)H DEHYDROGENASE 1); NADH dehydrogenase
247427_at	AT5G62580	-3.18442	0.009459	binding
262315_at	AT1G70990	-3.18442	0.000503	proline-rich family protein
248590_at	AT5G49660	-3.18442	0.000422	leucine-rich repeat transmembrane protein kinase, putative
262134_at	AT1G77990	-3.18442	0.007704	AST56; sulfate transmembrane transporter
252711_at	AT3G43720	-3.18442	0.003354	protease inhibitor/seed storage/lipid transfer protein (LTP) family protein
253078_at	AT4G36180	-3.18442	0.000347	leucine-rich repeat family protein
253559_at	AT4G31140	-3.18442	0.000935	glycosyl hydrolase family 17 protein
267191_at	AT2G44110	-3.18442	0.003892	MLO15 (MILDEW RESISTANCE LOCUS O 15); calmodulin binding
250746_at	AT5G05880	-3.18442	0.001031	UDP-glucoronosyl/UDP-glucosyl transferase family protein
266581_at	AT2G46140	-3.18442	0.000173	late embryogenesis abundant protein, putative / LEA protein, putative
251944_at	AT3G53510	-3.18442	0.011527	ABC transporter family protein
258008_at	AT3G19430	-3.18442	0.007926	late embryogenesis abundant protein-related / LEA protein-related
251517_at	AT3G59370	-3.18442	0.004311	unknown protein
262526_at	AT1G17050	-3.18442	0.00276	SPS2 (Solanesyl diphosphate synthase 2); trans-octaprenyltranstransferase
253483_at	AT4G31910	-3.18442	0.008035	transferase family protein
254187_at	AT4G23890	-3.18442	0.006259	unknown protein
263549_at	AT2G21650	-3.18442	0.002303	MEE3 (MATERNAL EFFECT EMBRYO ARREST 3); DNA binding / transcription factor
253358_at	AT4G32940	-3.18442	0.001212	GAMMA-VPE (GAMMA VACUOLAR PROCESSING ENZYME); cysteine-type endopeptidase
249332_at	AT5G40980	-3.18442	0.001913	unknown protein
265066_at	AT1G03870	-3.18442	0.002206	FLA9 (FASCICLIN-LIKE ARABINOOGALACTAN 9)
265357_at	AT2G16740	-3.18442	0.000656	UBC29 (ubiquitin-conjugating enzyme 29); ubiquitin-protein ligase
245889_at	AT5G09480	-3.18442	0.002455	hydroxyproline-rich glycoprotein family protein
256368_at	AT1G66800	-3.18442	0.00163	cinnamyl-alcohol dehydrogenase family / CAD family
257217_at	AT3G14940	-3.18442	0.000595	ATPPC3 (PHOSPHOENOLPYRUVATE CARBOXYLASE 3); phosphoenolpyruvate carboxylase
261197_at	AT1G12900	-3.05889	0.004071	GAPA-2 (GLYCERALDEHYDE 3-PHOSPHATE DEHYDROGENASE A SUBUNIT 2); NAD or NADH binding / binding / catalytic/ glyceraldehyde-3-phosphate dehydrogenase (phosphorylating)/ glyceraldehyde-3-phosphate dehydrogenase
263668_at	AT1G04350	-3.05889	0.001595	2-oxoglutarate-dependent dioxygenase, putative
260549_at	AT2G43535	-3.05889	0.01067	trypsin inhibitor, putative
250860_at	AT5G04770	-3.05889	0.002325	CAT6 (CATIONIC AMINO ACID TRANSPORTER 6); amino acid transmembrane transporter/ basic amino acid transmembrane transporter/ cationic amino acid transmembrane transporter
255266_at	AT4G05200	-3.05889	0.005679	protein kinase family protein
249601_at	AT5G37980	-3.05889	0.004861	NADP-dependent oxidoreductase, putative
249227_at	AT5G42180	-3.05889	0.000223	peroxidase 64 (PER64) (P64) (PRXR4)
260547_at	AT2G43550	-3.05889	0.000285	trypsin inhibitor, putative
260097_at	AT1G73220	-3.05889	0.009398	AtOCT1 (Arabidopsis thaliana ORGANIC CATION/CARNITINE TRANSPORTER1); carbohydrate transmembrane transporter/ carnitine transporter/ transporter
263016_at	AT1G23410	-3.05889	0.000779	ubiquitin extension protein, putative / 40S ribosomal protein S27A (RPS27aA)
262988_at	AT1G23310	-3.05889	0.008362	GGT1 (GLUTAMATE:GLYOXYLATE AMINOTRANSFERASE); L-alanine:2-oxoglutarate aminotransferase/ glycine:2-oxoglutarate aminotransferase
264802_at	AT1G08560	-3.05889	0.003218	SYP111 (SYNTAXIN OF PLANTS 111); SNAP receptor
246962_s_at	AT5G24800	-3.05889	0.011526	BZIP9 (BASIC LEUCINE ZIPPER 9); DNA binding / protein heterodimerization/ transcription factor
266353_at	AT2G01520	-3.05889	0.005212	MLP328 (MLP-LIKE PROTEIN 328); copper ion binding
264102_at	AT1G79270	-3.05889	0.00048	ECT8 (evolutionarily conserved C-terminal region 8)
245546_at	AT4G15290	-3.05889	0.008027	ATCSLB05; cellulose synthase/ transferase/ transferase, transferring glycosyl groups
248756_at	AT5G47560	-3.05889	4.9e-05	TDT (TONOPLAST DICARBOXYLATE TRANSPORTER); malate transmembrane transporter/ sodium:dicarboxylate symporter
257959_at	AT3G25560	-3.05889	0.001104	NIK2 (NSP-INTERACTING KINASE 2); ATP binding / protein binding / protein kinase/ protein serine/threonine kinase
259282_at	AT3G11430	-3.05889	0.001796	GPAT5 (GLYCEROL-3-PHOSPHATE ACYLTRANSFERASE 5); 1-acylglycerol-3-phosphate O-acyltransferase/ acyltransferase/ organic anion transmembrane transporter
262120_at	AT1G02950	-3.05889	0.000218	ATGSTF4 (GLUTATHIONE S-TRANSFERASE F4); glutathione transferase
254328_at	AT4G22570	-3.05889	0.006583	APT3 (ADENINE PHOSPHORIBOSYL TRANSFERASE 3); adenine phosphoribosyltransferase
250455_at	AT5G09980	-3.05889	0.010203	PROPEP4 (Elicitor peptide 4 precursor)
266514_at	AT2G47890	-3.05889	0.000905	zinc finger (B-box type) family protein
259964_at	AT1G53680	-3.05889	0.008614	ATGSTU28 (GLUTATHIONE S-TRANSFERASE TAU 28); glutathione transferase
248912_at	AT5G45670	-3.05889	0.01253	GDSL-motif lipase/hydrolase family protein
245318_at	AT4G16980	-3.05889	0.010014	arabinogalactan-protein family
265182_at	AT1G23740	-3.05889	0.011341	oxidoreductase, zinc-binding dehydrogenase family protein
254111_at	AT4G24890	-3.05889	0.008068	PAP24 (PURPLE ACID PHOSPHATASE 24); acid phosphatase/ protein serine/threonine phosphatase
254914_at	AT4G11290	-3.05889	0.000405	peroxidase, putative
258139_at	AT3G24520	-3.05889	0.005294	AT-HSFC1; DNA binding / transcription factor
251575_at	AT3G58120	-3.05889	0.001327	BZIP61; DNA binding / transcription activator/ transcription factor
258054_at	AT3G16240	-3.05889	0.001185	DELTA-TIP; ammonia transporter/ methylammonium transmembrane transporter/ water channel
255528_at	AT4G02090	-3.05889	0.003682	unknown protein
246275_at	AT4G36540	-3.05889	0.000723	BEE2 (BR Enhanced Expression 2); DNA binding / transcription factor
254137_at	AT4G24930	-3.05889	0.00048	thylakoid lumenal 17.9 kDa protein, chloroplast
246792_at	AT5G27290	-3.05889	0.001222	unknown protein
247074_at	AT5G66590	-3.05889	0.003525	allergen V5/Tpx-1-related family protein
252740_at	AT3G43270	-3.05889	0.006921	pectinesterase family protein
247943_at	AT5G57170	-3.05889	0.000566	macrophage migration inhibitory factor family protein / MIF family protein
250741_at	AT5G05790	-3.05889	0.000238	myb family transcription factor
264195_at	AT1G22690	-3.05889	0.00159	gibberellin-responsive protein, putative
257353_at	AT2G23050	-2.94342	0.012883	NPY4 (NAKED PINS IN YUC MUTANTS 4); protein binding / signal transducer
253886_at	AT4G27710	-2.94342	0.000681	CYP709B3; electron carrier/ heme binding / iron ion binding / monooxygenase/ oxygen binding
266259_at	AT2G27830	-2.94342	0.000998	FUNCTIONS IN: molecular_function unknown; EXPRESSED IN: 22 plant structures; EXPRESSED DURING: 13 growth stages; BEST Arabidopsis thaliana protein match is: pentatricopeptide (PPR) repeat-containing protein (TAIR:AT4G22760.1); Has 68 Blast hits to 68 proteins in 11 species: Archae - 0; Bacteria - 0; Metazoa - 0; Fungi - 0; Plants - 68; Viruses - 0; Other Eukaryotes - 0 (source: NCBI BLink).
264096_at	AT1G78995	-2.94342	0.001788	unknown protein
256937_at	AT3G22620	-2.94342	0.00078	protease inhibitor/seed storage/lipid transfer protein (LTP) family protein
247136_at	AT5G66170	-2.94342	0.004966	FUNCTIONS IN: molecular_function unknown; INVOLVED IN: aging; LOCATED IN: cellular_component unknown; EXPRESSED IN: 22 plant structures; EXPRESSED DURING: 11 growth stages; CONTAINS InterPro DOMAIN/s: Rhodanese-like (InterPro:IPR001763); BEST Arabidopsis thaliana protein match is: unknown protein (TAIR:AT2G17850.1); Has 126 Blast hits to 126 proteins in 29 species: Archae - 2; Bacteria - 25; Meta…
249167_at	AT5G42860	-2.94342	0.004435	unknown protein
261745_at	AT1G08500	-2.94342	0.003241	plastocyanin-like domain-containing protein
260389_at	AT1G74055	-2.94342	3.6e-05	unknown protein
259625_at	AT1G42970	-2.94342	0.000297	GAPB (GLYCERALDEHYDE-3-PHOSPHATE DEHYDROGENASE B SUBUNIT); glyceraldehyde-3-phosphate dehydrogenase (NADP+)/ glyceraldehyde-3-phosphate dehydrogenase
257960_at	AT3G25570;AT3G25572	-2.94342	0.001156	[AT3G25570, adenosylmethionine decarboxylase family protein];[AT3G25572, CPuORF11 (Conserved peptide upstream open reading frame 11)]
255957_at	AT1G22160	-2.94342	0.011181	senescence-associated protein-related
247604_at	AT5G60950	-2.94342	0.000366	COBL5 (COBRA-LIKE PROTEIN 5 PRECURSOR)
244982_at	ATCG00780	-2.94342	0.000748	encodes a chloroplast ribosomal protein L14, a constituent of the large subunit of the ribosomal complex
250102_at	AT5G16590	-2.94342	0.004549	LRR1; ATP binding / kinase/ protein serine/threonine kinase
266516_at	AT2G47880	-2.94342	0.01142	glutaredoxin family protein
247474_at	AT5G62280	-2.94342	0.008562	unknown protein
248732_at	AT5G48070	-2.94342	0.000504	XTH20 (XYLOGLUCAN ENDOTRANSGLUCOSYLASE/HYDROLASE 20); hydrolase, acting on glycosyl bonds / hydrolase, hydrolyzing O-glycosyl compounds / xyloglucan:xyloglucosyl transferase
261801_at	AT1G30520	-2.94342	0.003163	AAE14 (Acyl-Activating Enzyme 14); AMP binding / o-succinylbenzoate-CoA ligase
249007_at	AT5G44650	-2.94342	0.000693	unknown protein
263987_at	AT2G42690	-2.94342	0.003196	lipase, putative
265569_at	AT2G05620	-2.94342	0.002913	PGR5 (proton gradient regulation 5); electron carrier
264466_at	AT1G10380	-2.94342	0.00323	unknown protein
260035_at	AT1G68850	-2.94342	0.001239	peroxidase, putative
245044_at	AT2G26500	-2.94342	0.004569	cytochrome b6f complex subunit (petM), putative
253811_at	AT4G28190	-2.94342	0.001088	ULT1 (ULTRAPETALA1); DNA binding
266745_at	AT2G02950	-2.94342	3.8e-05	PKS1 (PHYTOCHROME KINASE SUBSTRATE 1); protein binding
254746_at	AT4G12980	-2.94342	0.010494	auxin-responsive protein, putative
247134_at	AT5G66230	-2.94342	0.010313	unknown protein
262575_at	AT1G15210	-2.94342	0.009626	PDR7 (PLEIOTROPIC DRUG RESISTANCE 7); ATPase, coupled to transmembrane movement of substances
261480_at	AT1G14280	-2.94342	0.005756	PKS2 (PHYTOCHROME KINASE SUBSTRATE 2)
253579_at	AT4G30610	-2.94342	0.003943	BRS1 (BRI1 SUPPRESSOR 1); serine-type carboxypeptidase
245000_at	ATCG00210	-2.94342	0.000135	hypothetical protein
265170_at	AT1G23730	-2.94342	0.003626	BCA3 (BETA CARBONIC ANHYDRASE 4); carbonate dehydratase/ zinc ion binding
256097_at	AT1G13670	-2.94342	0.004032	unknown protein
245388_at	AT4G16410	-2.94342	0.001732	unknown protein
258675_at	AT3G08770	-2.94342	0.002184	LTP6; lipid binding
245688_at	AT1G28290	-2.94342	0.003402	AGP31 (arabinogalactan-protein 31)
246825_at	AT5G26260	-2.94342	0.00098	meprin and TRAF homology domain-containing protein / MATH domain-containing protein
255809_at	AT4G10300	-2.94342	0.000463	FUNCTIONS IN: molecular_function unknown; LOCATED IN: chloroplast; EXPRESSED IN: 22 plant structures; EXPRESSED DURING: 14 growth stages; CONTAINS InterPro DOMAIN/s: Cupin, RmlC-type (InterPro:IPR011051), Protein of unknown function DUF861, cupin-3 (InterPro:IPR008579), RmlC-like jelly roll fold (InterPro:IPR014710); BEST Arabidopsis thaliana protein match is: unknown protein (TAIR:AT3G04300.1); …
256008_s_at	AT1G34040;AT1G34060	-2.94342	0.001017	[AT1G34040, alliinase family protein];[AT1G34060, alliinase family protein]
266100_at	AT2G37980	-2.94342	0.001791	unknown protein
247252_at	AT5G64770	-2.94342	0.008585	unknown protein
264775_at	AT1G22880	-2.94342	0.005607	CEL5 (CELLULASE 5); catalytic/ hydrolase, hydrolyzing O-glycosyl compounds
265704_at	AT2G03420	-2.94342	0.007147	unknown protein
254643_at	AT4G18820	-2.94342	0.000989	ATP binding / DNA binding / DNA-directed DNA polymerase/ nucleoside-triphosphatase/ nucleotide binding
247954_at	AT5G56870	-2.94342	0.003545	BGAL4 (beta-galactosidase 4); beta-galactosidase
258418_at	no_match	-2.94342	0.01271	no_match
253073_at	AT4G37410	-2.8365	0.005018	CYP81F4; electron carrier/ heme binding / iron ion binding / monooxygenase/ oxygen binding
260592_at	AT1G55850	-2.8365	0.000471	ATCSLE1; cellulose synthase/ transferase, transferring glycosyl groups
256125_at	AT1G18250	-2.8365	0.009943	ATLP-1
248865_at	AT5G46790	-2.8365	9e-05	unknown protein
250892_at	AT5G03760	-2.8365	0.002809	ATCSLA09; mannan synthase/ transferase, transferring glycosyl groups
246483_at	AT5G16000	-2.8365	0.001276	NIK1 (NSP-INTERACTING KINASE 1); kinase
263005_at	AT1G54540	-2.8365	0.003635	FUNCTIONS IN: molecular_function unknown; INVOLVED IN: biological_process unknown; LOCATED IN: cellular_component unknown; EXPRESSED IN: hypocotyl, flower, root; EXPRESSED DURING: petal differentiation and expansion stage; CONTAINS InterPro DOMAIN/s: Harpin-induced 1 (InterPro:IPR010847); BEST Arabidopsis thaliana protein match is: harpin-induced protein-related / HIN1-related / harpin-responsive…
256894_at	AT3G21870	-2.8365	0.001905	CYCP2;1 (cyclin p2;1); cyclin-dependent protein kinase
261574_at	AT1G01190	-2.8365	0.00039	CYP78A8; electron carrier/ heme binding / iron ion binding / monooxygenase/ oxygen binding
250669_at	AT5G06870	-2.8365	0.002383	PGIP2 (POLYGALACTURONASE INHIBITING PROTEIN 2); protein binding
248725_at	AT5G47980	-2.8365	0.009984	transferase family protein
267459_at	AT2G33850	-2.8365	0.011269	unknown protein
256455_at	AT1G75190	-2.8365	0.000496	unknown protein
256864_at	AT3G23890	-2.8365	3e-05	TOPII (TOPOISOMERASE II); ATP binding / DNA binding / DNA topoisomerase (ATP-hydrolyzing)/ DNA topoisomerase/ DNA-dependent ATPase
248736_at	AT5G48110	-2.8365	0.009237	terpene synthase/cyclase family protein
247030_at	AT5G67210	-2.8365	0.007945	unknown protein
263599_at	AT2G01830	-2.8365	0.001428	WOL (WOODEN LEG); cytokinin receptor/ osmosensor/ phosphoprotein phosphatase/ protein histidine kinase
261536_at	AT1G01790	-2.8365	0.003227	KEA1 (K EFFLUX ANTIPORTER 1); potassium ion transmembrane transporter/ potassium:hydrogen antiporter
252280_at	AT3G49260	-2.8365	0.00095	iqd21 (IQ-domain 21); calmodulin binding
251315_at	AT3G61410	-2.8365	5e-05	FUNCTIONS IN: molecular_function unknown; INVOLVED IN: biological_process unknown; LOCATED IN: cellular_component unknown; BEST Arabidopsis thaliana protein match is: protein kinase family protein / U-box domain-containing protein (TAIR:AT2G45910.1); Has 146 Blast hits to 144 proteins in 9 species: Archae - 0; Bacteria - 0; Metazoa - 13; Fungi - 0; Plants - 132; Viruses - 0; Other Eukaryotes - 1 …
263736_at	AT1G60000	-2.8365	0.000476	29 kDa ribonucleoprotein, chloroplast, putative / RNA-binding protein cp29, putative
263914_at	AT2G36400	-2.8365	0.001902	AtGRF3 (GROWTH-REGULATING FACTOR 3); transcription activator
262049_at	AT1G80180	-2.8365	0.011387	unknown protein
266707_at	AT2G03310	-2.8365	0.006305	unknown protein
256856_at	AT3G15110	-2.8365	0.000577	unknown protein
244934_at	ATCG01080	-2.8365	0.00085	NADH dehydrogenase ND6
247246_at	AT5G64620	-2.8365	0.001398	C/VIF2 (CELL WALL / VACUOLAR INHIBITOR OF FRUCTOSIDASE 2); enzyme inhibitor/ pectinesterase/ pectinesterase inhibitor
265355_at	AT2G16760	-2.8365	0.000526	FUNCTIONS IN: molecular_function unknown; LOCATED IN: endoplasmic reticulum; EXPRESSED IN: 10 plant structures; EXPRESSED DURING: 6 growth stages; CONTAINS InterPro DOMAIN/s: Six-bladed beta-propeller, TolB-like (InterPro:IPR011042); BEST Arabidopsis thaliana protein match is: unknown protein (TAIR:AT2G47370.1); Has 78 Blast hits to 78 proteins in 24 species: Archae - 0; Bacteria - 32; Metazoa - …
256626_at	AT3G20015	-2.8365	0.006856	aspartic-type endopeptidase
265109_s_at	AT1G63360;AT1G62630	-2.8365	0.002765	[AT1G63360, disease resistance protein (CC-NBS-LRR class), putative];[AT1G62630, disease resistance protein (CC-NBS-LRR class), putative]
249035_at	AT5G44190	-2.8365	0.00264	GLK2 (GOLDEN2-LIKE 2); DNA binding / transcription factor/ transcription regulator
249411_at	AT5G40390	-2.8365	0.001488	SIP1 (seed imbibition 1-like); galactinol-sucrose galactosyltransferase/ hydrolase, hydrolyzing O-glycosyl compounds
264338_at	AT1G70300	-2.8365	0.001561	KUP6; potassium ion transmembrane transporter
244965_at	ATCG00590	-2.8365	0.00458	hypothetical protein
245018_at	ATCG00520	-2.8365	0.002662	Encodes a protein required for photosystem I assembly and stability. In cyanobacteria, loss of function mutation in this gene increases PSII/PSI ratio without any influence on photoautotrophic growth.
257204_at	AT3G23805	-2.8365	0.000507	RALFL24 (ralf-like 24); signal transducer
249945_at	AT5G22440	-2.8365	0.000489	60S ribosomal protein L10A (RPL10aC)
258800_at	AT3G04550	-2.8365	0.009042	unknown protein
256383_at	AT1G66820	-2.73697	0.000539	glycine-rich protein
254697_at	AT4G17970	-2.73697	0.002089	unknown protein
252205_at	AT3G50350	-2.73697	0.000317	unknown protein
251941_at	AT3G53470	-2.73697	0.003883	unknown protein
252353_at	AT3G48200	-2.73697	0.001899	unknown protein
244933_at	ATCG01070	-2.73697	0.01127	NADH dehydrogenase ND4L
245005_at	ATCG00330	-2.73697	0.001413	30S chloroplast ribosomal protein S14
267409_at	AT2G34910	-2.73697	0.002334	unknown protein
258480_at	AT3G02640	-2.73697	0.003089	unknown protein
247354_at	AT5G63590	-2.73697	0.000432	FLS3 (FLAVONOL SYNTHASE 3); flavonol synthase
256751_at	AT3G27170	-2.73697	0.000347	CLC-B (CHLORIDE CHANNEL B); anion channel/ voltage-gated chloride channel
245195_at	AT1G67740	-2.73697	0.005315	PSBY
256684_at	AT3G32040	-2.73697	0.000187	geranylgeranyl pyrophosphate synthase, putative / GGPP synthetase, putative / farnesyltranstransferase, putative
252248_at	AT3G49750	-2.73697	0.00262	AtRLP44 (Receptor Like Protein 44); protein binding
247297_at	AT5G64100	-2.73697	0.001692	peroxidase, putative
260126_at	AT1G36370	-2.73697	0.002595	SHM7 (serine hydroxymethyltransferase 7); catalytic/ glycine hydroxymethyltransferase/ pyridoxal phosphate binding
252638_at	AT3G44540	-2.73697	0.000718	FAR4 (FATTY ACID REDUCTASE 4); binding / catalytic/ oxidoreductase, acting on the CH-CH group of donors
266566_at	AT2G24040	-2.73697	0.003001	hydrophobic protein, putative / low temperature and salt responsive protein, putative
264987_at	AT1G27030	-2.73697	0.002571	unknown protein
251524_at	AT3G58990	-2.73697	0.011597	aconitase C-terminal domain-containing protein
251796_at	AT3G55360	-2.73697	0.00167	CER10; 3-oxo-5-alpha-steroid 4-dehydrogenase/ fatty acid elongase/ trans-2-enoyl-CoA reductase (NADPH)
265160_at	AT1G31050	-2.73697	0.008042	transcription factor
265962_at	AT2G37460	-2.73697	0.000798	nodulin MtN21 family protein
253227_at	AT4G35030	-2.73697	0.000919	protein kinase family protein
257005_at	AT3G14190	-2.73697	0.000782	unknown protein
249684_s_at	AT5G36130;AT5G36110	-2.73697	0.00647	[AT5G36130, cytochrome P450 family];[AT5G36110, CYP716A1; electron carrier/ heme binding / iron ion binding / monooxygenase/ oxygen binding]
266774_at	AT2G29050	-2.73697	0.003832	ATRBL1 (Arabidopsis thaliana Rhomboid-like 1)
265740_at	AT2G01150	-2.73697	2.6e-05	RHA2B (RING-H2 FINGER PROTEIN 2B); protein binding / ubiquitin-protein ligase/ zinc ion binding
246913_at	AT5G25830	-2.73697	0.001164	zinc finger (GATA type) family protein
245574_at	AT4G14750	-2.73697	0.00297	IQD19 (IQ-domain 19); calmodulin binding
266483_at	AT2G47910	-2.73697	0.000197	CRR6 (chlororespiratory reduction 6)
261660_at	AT1G18370	-2.73697	0.002734	HIK (HINKEL); ATP binding / microtubule motor
254919_at	AT4G11360	-2.73697	0.002612	RHA1B; protein binding / zinc ion binding
246415_at	AT5G17160	-2.73697	0.007088	unknown protein
253087_at	AT4G36350	-2.73697	0.002061	PAP25 (PURPLE ACID PHOSPHATASE 25); acid phosphatase/ protein serine/threonine phosphatase
258845_at	AT3G03150	-2.73697	0.000782	unknown protein
259548_at	AT1G35260	-2.73697	0.003708	MLP165 (MLP-LIKE PROTEIN 165)
244938_at	ATCG01120	-2.73697	0.000514	encodes a chloroplast ribosomal protein S15, a constituent of the small subunit of the ribosomal complex
248526_at	AT5G50740	-2.73697	0.000209	metal ion binding
246378_at	AT1G57620	-2.73697	0.001398	emp24/gp25L/p24 family protein
255576_at	AT4G01440	-2.73697	0.001833	nodulin MtN21 family protein
252102_at	AT3G50970	-2.73697	0.008934	LTI30 (LOW TEMPERATURE-INDUCED 30)
262897_at	AT1G59840	-2.64386	0.002685	CCB4 (COFACTOR ASSEMBLY OF COMPLEX C)
254693_at	AT4G17880	-2.64386	0.001984	basic helix-loop-helix (bHLH) family protein
261509_at	AT1G71740	-2.64386	0.004853	unknown protein
266319_s_at	AT3G10280;AT2G46720	-2.64386	0.002185	[AT3G10280, KCS14 (3-KETOACYL-COA SYNTHASE 14); acyltransferase/ catalytic/ transferase, transferring acyl groups other than amino-acyl groups];[AT2G46720, KCS13 (3-KETOACYL-COA SYNTHASE 13); acyltransferase/ catalytic/ transferase, transferring acyl groups other than amino-acyl groups]
251243_at	AT3G61870	-2.64386	0.001381	unknown protein
249850_at	AT5G23240	-2.64386	0.004836	DNAJ heat shock N-terminal domain-containing protein
252202_at	AT3G50300	-2.64386	0.000186	transferase family protein
258293_at	AT3G23430	-2.64386	0.000867	PHO1 (phosphate 1)
249882_at	AT5G22890	-2.64386	0.006954	zinc finger (C2H2 type) family protein
262283_at	AT1G68590	-2.64386	0.00107	plastid-specific 30S ribosomal protein 3, putative / PSRP-3, putative
259460_at	AT1G44000	-2.64386	0.001989	unknown protein
255873_at	AT2G30340	-2.64386	0.000774	LBD13 (LOB DOMAIN-CONTAINING PROTEIN 13)
265768_at	AT2G48020	-2.64386	0.002769	sugar transporter, putative
248646_at	AT5G49100	-2.64386	0.000353	unknown protein
264920_at	AT1G60550	-2.64386	6.1e-05	ECHID (ENOYL-COA HYDRATASE/ISOMERASE D); catalytic/ naphthoate synthase
245026_at	ATCG00140	-2.64386	0.001205	ATPase III subunit
247696_at	AT5G59780	-2.64386	0.000222	MYB59 (MYB DOMAIN PROTEIN 59); DNA binding / transcription factor
266215_at	AT2G06850	-2.64386	0.000168	EXGT-A1 (ENDOXYLOGLUCAN TRANSFERASE); hydrolase, acting on glycosyl bonds / xyloglucan:xyloglucosyl transferase
245281_at	AT4G15560	-2.64386	0.009705	CLA1 (CLOROPLASTOS ALTERADOS 1); 1-deoxy-D-xylulose-5-phosphate synthase
252036_at	AT3G52070	-2.64386	0.008143	unknown protein
262421_at	AT1G50290	-2.64386	0.000838	unknown protein
249914_at	AT5G22850	-2.64386	0.000602	aspartyl protease family protein
261226_at	AT1G20190	-2.64386	0.000223	ATEXPA11 (ARABIDOPSIS THALIANA EXPANSIN 11)
250366_at	AT5G11420	-2.64386	0.009956	FUNCTIONS IN: molecular_function unknown; INVOLVED IN: biological_process unknown; LOCATED IN: cell wall, plant-type cell wall; EXPRESSED IN: 23 plant structures; EXPRESSED DURING: 13 growth stages; CONTAINS InterPro DOMAIN/s: Protein of unknown function DUF642 (InterPro:IPR006946), Galactose-binding like (InterPro:IPR008979); BEST Arabidopsis thaliana protein match is: unknown protein (TAIR:AT5G…
263656_at	AT1G04240	-2.64386	0.000158	SHY2 (SHORT HYPOCOTYL 2); transcription factor
253741_at	AT4G28890	-2.64386	0.001406	protein binding / ubiquitin-protein ligase/ zinc ion binding
245362_at	AT4G17460	-2.64386	0.002134	HAT1; DNA binding / transcription factor
249644_at	AT5G37010	-2.64386	0.001106	unknown protein
258005_at	AT3G19390	-2.64386	0.002917	cysteine proteinase, putative / thiol protease, putative
255924_at	AT1G22170	-2.64386	0.000243	phosphoglycerate/bisphosphoglycerate mutase family protein
259898_at	no_match	-2.64386	0.006992	no_match
245002_at	ATCG00270	-2.64386	0.00145	PSII D2 protein
261948_at	AT1G64680	-2.55639	0.003766	unknown protein
264201_at	AT1G22630	-2.55639	0.002726	unknown protein
250563_at	AT5G08050	-2.55639	0.012517	FUNCTIONS IN: molecular_function unknown; INVOLVED IN: biological_process unknown; LOCATED IN: thylakoid, chloroplast thylakoid membrane, chloroplast; EXPRESSED IN: 21 plant structures; EXPRESSED DURING: 13 growth stages; CONTAINS InterPro DOMAIN/s: Protein of unknown function DUF1118 (InterPro:IPR009500), Uncharacterised conserved protein UCP022207 (InterPro:IPR016801); Has 41 Blast hits to 41 p…
257421_at	AT1G12030	-2.55639	0.001267	unknown protein
245025_at	ATCG00130	-2.55639	0.000639	ATPase F subunit.
256168_at	AT1G51805	-2.55639	0.004706	leucine-rich repeat protein kinase, putative
244983_at	ATCG00790	-2.55639	0.002171	chloroplast gene encoding a ribosomal protein L16, which is a constituent of 50S large ribosomal subunit
250688_at	AT5G06510	-2.55639	0.012893	NF-YA10 (NUCLEAR FACTOR Y, SUBUNIT A10); transcription factor
244986_at	ATCG00820	-2.55639	0.001691	Encodes a 6.8-kDa protein of the small ribosomal subunit.
260058_at	AT1G78100	-2.55639	0.009395	F-box family protein
266802_at	AT2G22900	-2.55639	0.001781	galactosyl transferase GMA12/MNN10 family protein
251443_at	AT3G59940	-2.55639	0.00305	kelch repeat-containing F-box family protein
262855_at	AT1G20860	-2.55639	0.004488	phosphate transporter family protein
260155_at	AT1G52870	-2.55639	0.000898	peroxisomal membrane protein-related
267544_at	AT2G32720	-2.55639	0.000545	CB5-B (CYTOCHROME B5 ISOFORM B); heme binding
249010_at	AT5G44580	-2.55639	0.000641	unknown protein
254038_at	AT4G25910	-2.55639	0.001169	NFU3; structural molecule
259660_at	AT1G55260	-2.55639	0.009295	lipid binding
259738_at	AT1G64355	-2.55639	0.002949	unknown protein
267318_at	AT2G34770	-2.55639	1.9e-05	FAH1 (FATTY ACID HYDROXYLASE 1); catalytic/ fatty acid alpha-hydroxylase
253337_at	AT4G33470	-2.55639	0.001922	hda14 (histone deacetylase 14); histone deacetylase
259274_at	AT3G01220	-2.55639	0.001121	ATHB20 (ARABIDOPSIS THALIANA HOMEOBOX PROTEIN 20); DNA binding / transcription factor
256220_at	AT1G56230	-2.55639	0.000451	unknown protein
259858_at	AT1G68400	-2.55639	1.8e-05	leucine-rich repeat transmembrane protein kinase, putative
261196_at	AT1G12860	-2.55639	0.00124	SCRM2 (SCREAM 2); DNA binding / transcription factor
256454_at	AT1G75280	-2.55639	0.003367	isoflavone reductase, putative
252409_at	AT3G47650	-2.55639	0.000279	bundle-sheath defective protein 2 family / bsd2 family
262643_at	AT1G62770	-2.55639	0.001981	invertase/pectin methylesterase inhibitor family protein
262609_at	AT1G13930	-2.55639	0.003854	Involved in response to salt stress. Knockout mutants are hypersensitive to salt stress.
262879_at	AT1G64860	-2.55639	0.002751	SIGA (SIGMA FACTOR A); DNA binding / DNA-directed RNA polymerase/ sigma factor/ transcription factor
251031_at	AT5G02120	-2.55639	0.006385	OHP (ONE HELIX PROTEIN)
256115_at	AT1G16880	-2.55639	0.004886	uridylyltransferase-related
266711_at	AT2G46740	-2.55639	0.000412	FAD-binding domain-containing protein
244970_at	ATCG00660	-2.55639	0.002262	encodes a chloroplast ribosomal protein L20, a constituent of the large subunit of the ribosomal complex
262954_at	AT1G54500	-2.55639	0.004627	rubredoxin family protein
257311_at	AT3G26570	-2.55639	0.006543	PHT2;1 (PHOSPHATE TRANSPORTER 2;1); low affinity phosphate transmembrane transporter
245568_at	AT4G14650	-2.55639	0.008418	unknown protein
244974_at	ATCG00700	-2.55639	0.010466	PSII low MW protein
258223_at	AT3G15840	-2.55639	0.003719	PIFI (post-illumination chlorophyll fluorescence increase)
259603_at	AT1G56500	-2.47393	0.004486	haloacid dehalogenase-like hydrolase family protein
266827_at	AT2G22920	-2.47393	0.005834	serine carboxypeptidase S10 family protein
256978_at	AT3G21110	-2.47393	0.000756	PUR7 (PURIN 7); phosphoribosylaminoimidazolesuccinocarboxamide synthase
259391_s_at	AT1G06350;AT1G06360	-2.47393	0.012899	[AT1G06350, fatty acid desaturase family protein];[AT1G06360, fatty acid desaturase family protein]
255675_at	AT4G00480	-2.47393	0.000207	myc-related transcription factor (MYC1)
256920_at	AT3G18980	-2.47393	0.002409	F-box family protein
261729_s_at	AT1G47860;AT1G47840	-2.47393	0.000787	[AT1G47860, transposable element gene];[AT1G47840, HXK3 (HEXOKINASE 3); ATP binding / fructokinase/ glucokinase/ hexokinase]
266285_at	AT2G29180	-2.47393	0.00323	unknown protein
252459_s_at	AT3G47290;AT3G47220	-2.47393	0.000228	[AT3G47290, phosphoinositide-specific phospholipase C family protein];[AT3G47220, phosphoinositide-specific phospholipase C family protein]
264517_at	AT1G10120	-2.47393	0.003549	DNA binding / transcription factor
263168_at	AT1G03020	-2.47393	0.009193	glutaredoxin family protein
258468_at	AT3G06070	-2.47393	0.000593	unknown protein
252123_at	AT3G51240	-2.47393	0.010535	F3H (FLAVANONE 3-HYDROXYLASE); naringenin 3-dioxygenase
263387_at	AT2G40160	-2.47393	0.009555	INVOLVED IN: biological_process unknown; LOCATED IN: endomembrane system; EXPRESSED IN: stem, leaf whorl, hypocotyl, root, leaf; EXPRESSED DURING: LP.02 two leaves visible; CONTAINS InterPro DOMAIN/s: Protein of unknown function DUF231, plant (InterPro:IPR004253); BEST Arabidopsis thaliana protein match is: ESK1 (ESKIMO 1) (TAIR:AT3G55990.1); Has 710 Blast hits to 697 proteins in 16 species: Arch…
247175_at	AT5G65280	-2.47393	0.003176	GCL1 (GCR2-LIKE 1); catalytic
252023_at	AT3G52920	-2.47393	0.000909	unknown protein
245004_at	ATCG00300	-2.47393	0.009791	encodes PsbZ, which is a subunit of photosystem II. In Chlamydomonas, this protein has been shown to be essential in the interaction between PS II and the light harvesting complex II.
255913_at	AT1G66980	-2.47393	0.005184	protein kinase family protein / glycerophosphoryl diester phosphodiesterase family protein
260991_at	AT1G12160	-2.47393	7.7e-05	flavin-containing monooxygenase family protein / FMO family protein
262538_at	AT1G17140	-2.47393	0.000314	tropomyosin-related
253879_s_at	AT4G27560;AT4G27570	-2.47393	0.009987	[AT4G27560, glycosyltransferase family protein];[AT4G27570, glycosyltransferase family protein]
248696_at	AT5G48360	-2.47393	0.002436	formin homology 2 domain-containing protein / FH2 domain-containing protein
257162_s_at	AT3G24300;AT3G24290	-2.47393	0.00574	[AT3G24300, AMT1;3 (AMMONIUM TRANSPORTER 1;3); ammonium transmembrane transporter];[AT3G24290, AMT1;5 (AMMONIUM TRANSPORTER 1;5); ammonium transmembrane transporter]
247902_at	AT5G57350	-2.47393	0.004971	AHA3; ATPase/ hydrogen-exporting ATPase, phosphorylative mechanism
255365_at	AT4G04040	-2.47393	0.000114	MEE51 (maternal effect embryo arrest 51); diphosphate-fructose-6-phosphate 1-phosphotransferase
256244_at	AT3G12520	-2.47393	0.008232	SULTR4;2; sulfate transmembrane transporter
245285_s_at	AT4G14030;AT4G14040	-2.47393	0.005317	[AT4G14030, SBP1 (selenium-binding protein 1); selenium binding];[AT4G14040, SBP2 (SELENIUM-BINDING PROTEIN 2); selenium binding]
264209_at	AT1G22740	-2.47393	0.007233	RABG3B; GTP binding
250095_at	AT5G17230	-2.47393	0.004516	phytoene synthase (PSY) / geranylgeranyl-diphosphate geranylgeranyl transferase
263548_at	AT2G21660	-2.47393	0.004398	CCR2 (COLD, CIRCADIAN RHYTHM, AND RNA BINDING 2); RNA binding / double-stranded DNA binding / single-stranded DNA binding
262109_at	AT1G02730	-2.47393	0.003649	ATCSLD5; 1,4-beta-D-xylan synthase/ cellulose synthase
245133_at	AT2G45310	-2.47393	0.011402	GAE4 (UDP-D-GLUCURONATE 4-EPIMERASE 4); binding / catalytic/ coenzyme binding / racemase and epimerase, acting on carbohydrates and derivatives
245981_at	AT5G13100	-2.47393	8e-06	unknown protein
259980_at	AT1G76520	-2.47393	0.00016	auxin efflux carrier family protein
255088_at	AT4G09350	-2.47393	0.009579	DNAJ heat shock N-terminal domain-containing protein
250031_at	AT5G18240	-2.47393	0.006735	MYR1 (MYb-related protein 1); transcription factor
256273_at	AT3G12090	-2.47393	0.000601	TET6 (TETRASPANIN6)
245540_at	AT4G15230	-2.47393	0.011364	PDR2 (PLEIOTROPIC DRUG RESISTANCE 2); ATPase, coupled to transmembrane movement of substances
262645_at	AT1G62750	-2.47393	0.006836	SCO1 (SNOWY COTYLEDON 1); ATP binding / translation elongation factor/ translation factor, nucleic acid binding
267377_at	AT2G26250	-2.47393	0.001862	KCS10 (3-KETOACYL-COA SYNTHASE 10); acyltransferase/ catalytic/ transferase, transferring acyl groups other than amino-acyl groups
266368_at	AT2G41380	-2.39593	0.00621	embryo-abundant protein-related
266927_at	AT2G45960	-2.39593	0.000325	PIP1B (NAMED PLASMA MEMBRANE INTRINSIC PROTEIN 1B); water channel
255440_at	AT4G02530	-2.39593	0.000335	chloroplast thylakoid lumen protein
248423_at	AT5G51670	-2.39593	0.001124	unknown protein
265246_at	AT2G43050	-2.39593	0.001878	ATPMEPCRD; enzyme inhibitor/ pectinesterase
266599_at	no_match	-2.39593	0.004204	no_match
245576_at	AT4G14770	-2.39593	0.000906	TCX2 (TESMIN/TSO1-LIKE CXC 2); transcription factor
263904_at	AT2G36380	-2.39593	0.000365	PDR6; ATPase, coupled to transmembrane movement of substances
254109_at	AT4G25240	-2.39593	0.001417	SKS1 (SKU5 SIMILAR 1); copper ion binding / oxidoreductase
257175_s_at	AT3G23480;AT3G23470	-2.39593	0.003122	[AT3G23480, cyclopropane fatty acid synthase-related];[AT3G23470, cyclopropane-fatty-acyl-phospholipid synthase]
254785_at	AT4G12730	-2.39593	0.00602	FLA2 (FASCICLIN-LIKE ARABINOGALACTAN 2)
259774_at	AT1G29520	-2.39593	0.002269	AWPM-19-like membrane family protein
257500_s_at	AT5G36180;AT1G73300	-2.39593	0.001898	[AT5G36180, scpl1 (serine carboxypeptidase-like 1); serine-type carboxypeptidase];[AT1G73300, scpl2 (serine carboxypeptidase-like 2); serine-type carboxypeptidase]
246294_at	AT3G56910	-2.39593	0.001142	PSRP5 (PLASTID-SPECIFIC 50S RIBOSOMAL PROTEIN 5)
264497_at	AT1G30840	-2.39593	0.005142	ATPUP4; purine transmembrane transporter
250231_at	AT5G13910	-2.39593	0.00368	LEP (LEAFY PETIOLE); DNA binding / transcription factor
253660_at	AT4G30140	-2.39593	0.00026	GDSL-motif lipase/hydrolase family protein
260112_at	AT1G63310	-2.39593	0.002881	FUNCTIONS IN: molecular_function unknown; INVOLVED IN: biological_process unknown; LOCATED IN: cellular_component unknown; EXPRESSED IN: 23 plant structures; EXPRESSED DURING: 13 growth stages; BEST Arabidopsis thaliana protein match is: oxidoreductase, acting on NADH or NADPH (TAIR:AT1G75260.1); Has 35 Blast hits to 35 proteins in 7 species: Archae - 0; Bacteria - 0; Metazoa - 0; Fungi - 0; Plan…
260546_at	AT2G43520	-2.39593	0.000923	ATTI2; serine-type endopeptidase inhibitor
261056_at	AT1G01360	-2.39593	8e-06	unknown protein
254102_at	AT4G25050	-2.39593	0.000995	ACP4 (acyl carrier protein 4); acyl carrier
253823_at	AT4G28030	-2.39593	0.010715	GCN5-related N-acetyltransferase (GNAT) family protein
247856_at	AT5G58300	-2.39593	0.000916	leucine-rich repeat transmembrane protein kinase, putative
253096_at	AT4G37330	-2.39593	0.002067	CYP81D4; electron carrier/ heme binding / iron ion binding / monooxygenase/ oxygen binding
260774_at	AT1G78290	-2.39593	0.002402	serine/threonine protein kinase, putative
255417_at	AT4G03190	-2.39593	0.003135	GRH1 (GRR1-LIKE PROTEIN 1); auxin binding / protein binding / ubiquitin-protein ligase
258086_at	AT3G25860	-2.39593	0.002202	LTA2; dihydrolipoyllysine-residue acetyltransferase
256647_at	AT3G13610	-2.39593	0.001671	oxidoreductase, 2OG-Fe(II) oxygenase family protein
246488_at	AT5G16010	-2.39593	0.009731	3-oxo-5-alpha-steroid 4-dehydrogenase family protein / steroid 5-alpha-reductase family protein
246075_at	AT5G20410	-2.39593	0.009968	MGD2; 1,2-diacylglycerol 3-beta-galactosyltransferase/ UDP-galactosyltransferase/ transferase, transferring glycosyl groups
251723_at	AT3G56230	-2.39593	0.000747	speckle-type POZ protein-related
254290_at	AT4G23000	-2.39593	0.004856	hydrolase/ protein serine/threonine phosphatase
261727_at	AT1G76090	-2.39593	0.001742	SMT3 (STEROL METHYLTRANSFERASE 3); S-adenosylmethionine-dependent methyltransferase/ sterol 24-C-methyltransferase
244997_at	ATCG00170	-2.39593	0.006648	RNA polymerase beta' subunit-2
245019_at	ATCG00530	-2.39593	0.001785	hypothetical protein
250327_at	AT5G12050	-2.39593	0.005116	unknown protein
265073_at	AT1G55480	-2.39593	0.002604	binding / protein binding
266649_at	AT2G25810	-2.32193	0.006514	TIP4;1 (tonoplast intrinsic protein 4;1); water channel
245050_at	ATCG00070	-2.32193	0.008862	PSII K protein
247273_at	AT5G64342;AT5G64340;AT5G64343;AT5G64341	-2.32193	0.003081	[AT5G64342, CPuORF39 (Conserved peptide upstream open reading frame 39)];[AT5G64340, SAC51 (SUPPRESSOR OF ACAULIS 51); transcription factor/ transcription regulator];[AT5G64343, CPuORF38 (Conserved peptide upstream open reading frame 38)];[AT5G64341, CPuORF40 (Conserved peptide upstream open reading frame 40)]
253525_at	AT4G31330	-2.32193	0.007295	unknown protein
264523_at	AT1G10030	-2.32193	0.000878	ERG28 (Arabidopsis homolog of yeast ergosterol28)
257203_at	AT3G23730	-2.32193	0.004802	xyloglucan:xyloglucosyl transferase, putative / xyloglucan endotransglycosylase, putative / endo-xyloglucan transferase, putative
261318_at	AT1G53035	-2.32193	0.003235	unknown protein
255690_at	no_match	-2.32193	0.002467	no_match
263763_at	AT2G21385	-2.32193	0.000973	unknown protein
258047_at	AT3G21240	-2.32193	0.006313	4CL2 (4-COUMARATE:COA LIGASE 2); 4-coumarate-CoA ligase
248085_at	AT5G55480	-2.32193	6.5e-05	SVL1 (SHV3-LIKE 1); glycerophosphodiester phosphodiesterase/ phosphoric diester hydrolase
248402_at	AT5G52100	-2.32193	0.006601	crr1 (chlororespiration reduction 1); dihydrodipicolinate reductase
260840_at	AT1G29050	-2.32193	0.000346	unknown protein
264990_at	AT1G27210	-2.32193	0.001837	binding
249220_at	AT5G42420	-2.32193	0.000702	transporter-related
251324_at	AT3G61430	-2.32193	0.009013	PIP1A (PLASMA MEMBRANE INTRINSIC PROTEIN 1A); water channel
254090_at	AT4G25010	-2.32193	0.00747	nodulin MtN3 family protein
249794_at	AT5G23530	-2.32193	0.000716	AtCXE18 (Arabidopsis thaliana carboxyesterase 18); carboxylesterase
258566_at	AT3G04110	-2.32193	0.000924	GLR1.1 (GLUTAMATE RECEPTOR 1.1); cation channel/ intracellular ligand-gated ion channel
253403_at	AT4G32830	-2.32193	0.004705	AtAUR1 (ATAURORA1); histone kinase(H3-S10 specific) / kinase/ protein serine/threonine kinase
255554_at	AT4G01897	-2.32193	0.005667	unknown protein
253065_at	AT4G37740	-2.32193	0.002296	AtGRF2 (GROWTHREGULATING FACTOR 2); transcription activator
250803_at	AT5G04980	-2.32193	0.004515	endonuclease/exonuclease/phosphatase family protein
253283_at	AT4G34090	-2.32193	0.003114	unknown protein
265494_at	AT2G15680	-2.32193	0.001014	calmodulin-related protein, putative
254198_at	AT4G24090	-2.32193	0.000738	unknown protein
247116_at	AT5G65970	-2.32193	0.000404	MLO10 (MILDEW RESISTANCE LOCUS O 10); calmodulin binding
248624_at	AT5G48790	-2.32193	0.001805	unknown protein
248091_at	AT5G55120	-2.32193	0.011696	VTC5 (VITAMIN C DEFECTIVE 5); GDP-D-glucose phosphorylase/ galactose-1-phosphate guanylyltransferase (GDP)/ quercetin 4'-O-glucosyltransferase
257670_at	AT3G20340	-2.25154	0.011057	Expression of the gene is downregulated in the presence of paraquat, an inducer of photoxidative stress.
244981_at	ATCG00770	-2.25154	0.001209	chloroplast 30S ribosomal protein S8
258059_at	AT3G29035	-2.25154	0.005754	ATNAC3 (ARABIDOPSIS NAC DOMAIN CONTAINING PROTEIN 3); protein heterodimerization/ transcription factor
256324_at	AT1G66760	-2.25154	0.00507	MATE efflux family protein
256655_at	AT3G18890	-2.25154	0.010836	binding / catalytic/ coenzyme binding
259180_at	AT3G01680	-2.25154	0.012124	unknown protein
265118_at	AT1G62660	-2.25154	0.004087	beta-fructosidase (BFRUCT3) / beta-fructofuranosidase / invertase, vacuolar
246540_at	AT5G15600	-2.25154	0.005487	SP1L4 (SPIRAL1-LIKE4)
245117_at	AT2G41560	-2.25154	0.001914	ACA4 (AUTO-INHIBITED CA(2+)-ATPASE, ISOFORM 4); calcium-transporting ATPase/ calmodulin binding
264240_at	AT1G54820	-2.25154	0.007643	protein kinase family protein
265584_at	AT2G20180	-2.25154	0.005073	PIL5 (PHYTOCHROME INTERACTING FACTOR 3-LIKE 5); DNA binding / phytochrome binding / transcription factor
263386_at	AT2G40150	-2.25154	0.000944	INVOLVED IN: biological_process unknown; EXPRESSED IN: 21 plant structures; EXPRESSED DURING: 13 growth stages; CONTAINS InterPro DOMAIN/s: Protein of unknown function DUF231, plant (InterPro:IPR004253); BEST Arabidopsis thaliana protein match is: ESK1 (ESKIMO 1) (TAIR:AT3G55990.1); Has 712 Blast hits to 693 proteins in 16 species: Archae - 0; Bacteria - 0; Metazoa - 0; Fungi - 0; Plants - 712; V…
257264_at	AT3G22060	-2.25154	0.006527	receptor protein kinase-related
262783_at	AT1G10850	-2.25154	0.0089	ATP binding / protein binding / protein kinase/ protein serine/threonine kinase
253243_at	AT4G34560	-2.25154	0.001112	unknown protein
247867_at	AT5G57630	-2.25154	0.000873	CIPK21 (CBL-interacting protein kinase 21); ATP binding / kinase/ protein kinase/ protein serine/threonine kinase
260558_at	AT2G43600	-2.25154	0.002066	glycoside hydrolase family 19 protein
258552_at	AT3G07010	-2.25154	0.000358	pectate lyase family protein
265628_at	AT2G27290	-2.25154	0.002798	unknown protein
259658_at	AT1G55370	-2.25154	0.00414	carbohydrate binding / catalytic
257880_at	AT3G16910	-2.25154	0.012785	AAE7 (ACYL-ACTIVATING ENZYME 7); AMP binding / acetate-CoA ligase
245023_at	ATCG00080	-2.25154	0.00647	PSII I protein
250650_at	AT5G06850	-2.25154	0.006818	C2 domain-containing protein
257814_at	AT3G25110	-2.25154	0.00112	AtFaTA (Arabidopsis FatA acyl-ACP thioesterase); acyl carrier/ acyl-[acyl-carrier-protein] hydrolase
246226_at	AT4G37200	-2.25154	0.000883	HCF164; oxidoreductase, acting on sulfur group of donors, disulfide as acceptor
262958_at	AT1G54410	-2.25154	0.004829	dehydrin family protein
255433_at	AT4G03210	-2.25154	0.010518	XTH9 (XYLOGLUCAN ENDOTRANSGLUCOSYLASE/HYDROLASE 9); hydrolase, acting on glycosyl bonds / xyloglucan:xyloglucosyl transferase
252688_at	AT3G44020	-2.25154	0.004269	thylakoid lumenal P17.1 protein
254410_at	AT4G21410	-2.25154	0.001073	protein kinase family protein
245090_at	AT2G40900	-2.25154	0.00585	nodulin MtN21 family protein
265998_at	AT2G24270	-2.25154	0.003697	ALDH11A3; 3-chloroallyl aldehyde dehydrogenase/ glyceraldehyde-3-phosphate dehydrogenase (NADP+)
260429_at	AT1G72450	-2.25154	0.012256	JAZ6 (JASMONATE-ZIM-DOMAIN PROTEIN 6)
246703_at	AT5G28080	-2.25154	0.002823	WNK9; kinase/ protein kinase
248750_at	AT5G47530	-2.25154	0.007546	auxin-responsive protein, putative
250891_at	AT5G04530	-2.25154	0.00457	KCS19 (3-KETOACYL-COA SYNTHASE 19); acyltransferase/ catalytic/ transferase, transferring acyl groups other than amino-acyl groups
250173_at	AT5G14340	-2.25154	0.000866	AtMYB40 (myb domain protein 40); DNA binding / transcription factor
262354_at	AT1G64200	-2.25154	0.010078	VHA-E3 (VACUOLAR H+-ATPASE SUBUNIT E ISOFORM 3); proton-transporting ATPase, rotational mechanism
261981_at	AT1G33811	-2.25154	0.006441	GDSL-motif lipase/hydrolase family protein
267089_at	AT2G38300	-2.25154	0.000991	DNA binding / transcription factor
245876_at	AT1G26230	-2.25154	0.010163	chaperonin, putative
251846_at	AT3G54560	-2.25154	0.004809	HTA11; DNA binding
256164_at	AT1G48800	-2.25154	0.00609	terpene synthase/cyclase family protein
250992_at	AT5G02260	-2.18442	0.008885	ATEXPA9 (ARABIDOPSIS THALIANA EXPANSIN A9)
254810_at	AT4G12390	-2.18442	0.012847	PME1 (PECTIN METHYLESTERASE INHIBITOR 1); enzyme inhibitor/ pectinesterase/ pectinesterase inhibitor
251197_at	AT3G62960	-2.18442	0.007058	glutaredoxin family protein
253246_at	AT4G34600	-2.18442	0.000454	unknown protein
256612_at	AT3G29280	-2.18442	0.000328	unknown protein
258333_at	AT3G16000	-2.18442	0.006465	MFP1 (MAR BINDING FILAMENT-LIKE PROTEIN 1); DNA binding
245270_at	AT4G14960	-2.18442	8.2e-05	TUA6; structural constituent of cytoskeleton
252988_at	AT4G38410	-2.18442	0.004607	dehydrin, putative
254110_at	AT4G25260	-2.18442	0.002968	invertase/pectin methylesterase inhibitor family protein
257229_at	AT3G16490	-2.18442	0.001132	IQD26 (IQ-domain 26); calmodulin binding
267481_at	AT2G02780	-2.18442	0.002202	leucine-rich repeat transmembrane protein kinase, putative
249009_at	AT5G44610	-2.18442	0.006307	MAP18 (Microtubule-associated Protein 18); microtubule binding
246538_at	AT5G15520	-2.18442	0.00175	40S ribosomal protein S19 (RPS19B)
250475_at	AT5G10180	-2.18442	0.003324	AST68; sulfate transmembrane transporter
263726_at	AT2G13610	-2.18442	0.000819	ABC transporter family protein
260453_s_at	AT1G72510;AT2G09970	-2.18442	0.000465	[AT1G72510, unknown protein];[AT2G09970, unknown protein]
245016_at	ATCG00500	-2.18442	0.001815	Encodes the carboxytransferase beta subunit of the Acetyl-CoA carboxylase (ACCase) complex in plastids. This complex catalyzes the carboxylation of acetyl-CoA to produce malonyl-CoA, the first committed step in fatty acid synthesis.
250538_at	AT5G08620	-2.18442	0.000933	STRS2 (STRESS RESPONSE SUPPRESSOR 2); ATP-dependent helicase/ RNA binding
256070_at	AT1G13730	-2.18442	0.002728	nuclear transport factor 2 (NTF2) family protein / RNA recognition motif (RRM)-containing protein
264551_at	AT1G09460	-2.18442	0.001637	glucan endo-1,3-beta-glucosidase-related
252148_at	AT3G51280	-2.18442	0.009281	male sterility MS5, putative
253357_at	AT4G33400	-2.18442	0.000224	dem protein-related / defective embryo and meristems protein-related
266797_at	AT2G22840	-2.18442	0.009551	AtGRF1 (GROWTH-REGULATING FACTOR 1); transcription activator
262725_at	AT1G43580	-2.18442	0.000729	unknown protein
248779_at	AT5G47720	-2.18442	0.002832	acetyl-CoA C-acyltransferase, putative / 3-ketoacyl-CoA thiolase, putative
258989_at	AT3G08920	-2.18442	0.001499	rhodanese-like domain-containing protein
255858_at	AT1G67030	-2.18442	0.007904	ZFP6 (ZINC FINGER PROTEIN 6); nucleic acid binding / transcription factor/ zinc ion binding
251918_at	AT3G54040	-2.18442	0.011399	photoassimilate-responsive protein-related
250058_at	AT5G17870	-2.18442	0.006501	PSRP6 (PLASTID-SPECIFIC 50S RIBOSOMAL PROTEIN 6)
246826_at	AT5G26310	-2.18442	1.7e-05	UGT72E3; UDP-glycosyltransferase/ coniferyl-alcohol glucosyltransferase/ transferase, transferring glycosyl groups
251553_at	AT3G58710	-2.18442	0.007422	WRKY69; transcription factor
250753_at	AT5G05860	-2.18442	0.001055	UGT76C2; UDP-glycosyltransferase/ cis-zeatin O-beta-D-glucosyltransferase/ cytokinin 7-beta-glucosyltransferase/ cytokinin 9-beta-glucosyltransferase/ trans-zeatin O-beta-D-glucosyltransferase/ transferase, transferring glycosyl groups
254737_at	AT4G13840	-2.18442	0.008366	transferase family protein
257512_at	AT1G35250	-2.18442	0.001744	thioesterase family protein
246016_at	AT5G10720	-2.18442	0.004395	AHK5 (ARABIDOPSIS HISTIDINE KINASE 5); protein histidine kinase
255818_at	AT2G33570	-2.18442	0.000514	unknown protein
253580_at	AT4G30400	-2.18442	0.000391	zinc finger (C3HC4-type RING finger) family protein
244990_s_at	ATCG00870;ATCG01270	-2.18442	0.008307	[ATCG00870, hypothetical protein];[ATCG01270, hypothetical protein]
247694_at	AT5G59750	-2.18442	0.00294	riboflavin biosynthesis protein, putative
251881_at	AT3G54250	-2.18442	0.001048	mevalonate diphosphate decarboxylase, putative
251919_at	AT3G53800	-2.18442	0.012634	armadillo/beta-catenin repeat family protein
260644_at	AT1G53290	-2.18442	6.1e-05	galactosyltransferase family protein
264374_at	AT2G25180	-2.18442	0.000238	ARR12 (ARABIDOPSIS RESPONSE REGULATOR 12); transcription factor/ two-component response regulator
249709_at	AT5G35670	-2.18442	0.002313	iqd33 (IQ-domain 33); calmodulin binding
255435_at	AT4G03280	-2.18442	0.00454	PETC (PHOTOSYNTHETIC ELECTRON TRANSFER C); electron transporter, transferring electrons from cytochrome b6/f complex of photosystem II
245354_at	AT4G17600	-2.18442	0.011663	LIL3:1; transcription factor
246992_at	AT5G67430	-2.18442	0.004688	GCN5-related N-acetyltransferase (GNAT) family protein
254234_at	AT4G23680	-2.18442	0.00646	major latex protein-related / MLP-related
256953_at	AT3G29630	-2.18442	0.002607	glycosyltransferase family protein
259633_at	AT1G56500	-2.18442	0.010884	haloacid dehalogenase-like hydrolase family protein
261129_at	AT1G04820	-2.12029	0.000631	TUA4; structural constituent of cytoskeleton
248101_at	AT5G55200	-2.12029	0.001138	co-chaperone grpE protein, putative
262796_at	AT1G20850	-2.12029	0.001307	XCP2 (xylem cysteine peptidase 2); cysteine-type peptidase/ peptidase
257197_at	AT3G23800	-2.12029	0.002738	SBP3 (selenium-binding protein 3); selenium binding
265443_at	AT2G20750	-2.12029	0.002617	ATEXPB1 (ARABIDOPSIS THALIANA EXPANSIN B1)
260805_at	AT1G78320	-2.12029	0.007834	ATGSTU23 (GLUTATHIONE S-TRANSFERASE TAU 23); glutathione transferase
246199_at	AT4G36530	-2.12029	0.010865	hydrolase, alpha/beta fold family protein
256112_at	AT1G16920	-2.12029	0.008112	ATRABA1B (ARABIDOPSIS RAB GTPASE HOMOLOG A1B); GTP binding
263042_at	AT1G23340	-2.12029	0.001128	unknown protein
262376_at	AT1G72970	-2.12029	0.005273	HTH (HOTHEAD); FAD binding / aldehyde-lyase/ mandelonitrile lyase
249887_at	AT5G22310	-2.12029	0.0042	unknown protein
251162_at	AT3G63300	-2.12029	0.000355	phosphoinositide binding
256541_at	AT1G42540	-2.12029	0.003454	ATGLR3.3; intracellular ligand-gated ion channel
267465_at	AT2G19170	-2.12029	0.007401	SLP3; serine-type peptidase
261593_at	AT1G33170	-2.12029	0.005007	dehydration-responsive family protein
254839_at	AT4G12400	-2.12029	0.012768	stress-inducible protein, putative
245022_at	ATCG00560	-2.12029	0.001237	PSII L protein
258708_at	AT3G09580	-2.12029	0.000466	amine oxidase family protein
260944_at	AT1G45130	-2.12029	0.001646	BGAL5 (beta-galactosidase 5); beta-galactosidase/ catalytic/ cation binding
245155_at	AT5G12470	-2.12029	0.011372	unknown protein
251461_at	no_match	-2.12029	0.009392	no_match
261785_at	AT1G08230	-2.12029	0.001534	amino acid transporter family protein
263513_at	AT2G12400	-2.12029	0.00091	unknown protein
257773_at	AT3G29185	-2.12029	0.002827	unknown protein
262346_at	AT1G63980	-2.12029	0.001783	D111/G-patch domain-containing protein
248177_at	AT5G54630	-2.12029	8e-05	zinc finger protein-related
250500_at	AT5G09530	-2.12029	0.01239	hydroxyproline-rich glycoprotein family protein
258161_at	AT3G17930	-2.12029	0.000603	unknown protein
256402_at	AT3G06130	-2.12029	0.007846	heavy-metal-associated domain-containing protein
249115_at	AT5G43810	-2.12029	0.005094	ZLL (ZWILLE); translation initiation factor
249108_at	AT5G43690	-2.12029	0.002231	sulfotransferase family protein
265277_at	AT2G28410	-2.12029	0.000484	unknown protein
257504_at	AT1G52240	-2.12029	0.011601	ROPGEF11 (RHO GUANYL-NUCLEOTIDE EXCHANGE FACTOR 11); Rho guanyl-nucleotide exchange factor
262831_at	AT1G14730	-2.12029	0.001182	LOCATED IN: endomembrane system, integral to membrane; EXPRESSED IN: 16 plant structures; EXPRESSED DURING: 7 growth stages; CONTAINS InterPro DOMAIN/s: Cytochrome b561, eukaryote (InterPro:IPR004877), Cytochrome b561/ferric reductase transmembrane (InterPro:IPR006593); BEST Arabidopsis thaliana protein match is: ACYB-1; carbon-monoxide oxygenase (TAIR:AT5G38630.1); Has 447 Blast hits to 446 prot…
267307_at	AT2G30210	-2.12029	0.002216	LAC3 (laccase 3); laccase
252296_at	AT3G48970	-2.12029	0.001466	copper-binding family protein
254126_at	AT4G24770	-2.12029	0.006507	RBP31 (31-KDA RNA BINDING PROTEIN); RNA binding / poly(U) binding
262483_at	AT1G17220	-2.12029	0.008735	FUG1 (fu-gaeri1); translation initiation factor
252375_at	AT3G48040	-2.12029	0.005659	ROP10 (RHO-RELATED PROTEIN FROM PLANTS 10); GTP binding / GTPase
261230_at	AT1G20010	-2.12029	0.002987	TUB5; structural constituent of cytoskeleton
248990_at	AT5G45210	-2.05889	3e-06	disease resistance protein (TIR-NBS-LRR class), putative
256053_at	AT1G07260	-2.05889	0.003178	UGT71C3 (UDP-GLUCOSYL TRANSFERASE 71C3); UDP-glycosyltransferase/ quercetin 3-O-glucosyltransferase/ transferase, transferring glycosyl groups
253834_at	AT4G27800	-2.05889	0.000601	protein phosphatase 2C PPH1 / PP2C PPH1 (PPH1)
246067_at	AT5G19410	-2.05889	0.0104	ABC transporter family protein
261901_at	AT1G80920	-2.05889	0.00084	J8; heat shock protein binding / unfolded protein binding
263276_at	AT2G14100	-2.05889	0.002633	CYP705A13; electron carrier/ heme binding / iron ion binding / monooxygenase/ oxygen binding
258149_at	AT3G18110	-2.05889	0.002026	EMB1270 (embryo defective 1270)
257798_at	AT3G15950	-2.05889	0.000597	NAI2
250006_at	AT5G18660	-2.05889	0.005038	PCB2 (PALE-GREEN AND CHLOROPHYLL B REDUCED 2); 3,8-divinyl protochlorophyllide a 8-vinyl reductase
257671_at	AT3G20450	-2.05889	0.001705	FUNCTIONS IN: molecular_function unknown; INVOLVED IN: intracellular protein transport; LOCATED IN: endomembrane system, integral to membrane, endoplasmic reticulum; EXPRESSED IN: 8 plant structures; EXPRESSED DURING: 4 anthesis, petal differentiation and expansion stage; CONTAINS InterPro DOMAIN/s: B-cell receptor-associated 31-like (InterPro:IPR008417); BEST Arabidopsis thaliana protein match i…
265120_at	AT1G62640	-2.05889	0.00066	KAS III (3-KETOACYL-ACYL CARRIER PROTEIN SYNTHASE III); 3-oxoacyl-[acyl-carrier-protein] synthase/ catalytic/ transferase, transferring acyl groups other than amino-acyl groups
257663_at	AT3G20260	-2.05889	0.007434	structural constituent of ribosome
244993_s_at	ATCG01000;ATCG01130	-2.05889	0.004841	[ATCG01000, hypothetical protein];[ATCG01130, hypothetical protein]
260982_at	AT1G53520	-2.05889	0.006397	chalcone-flavanone isomerase-related
262451_at	AT1G11130	-2.05889	0.00681	SUB (STRUBBELIG); protein binding / receptor signaling protein serine/threonine kinase
265929_s_at	AT2G18560;AT2G18570	-2.05889	0.000958	[AT2G18560, UDP-glucoronosyl/UDP-glucosyl transferase family protein];[AT2G18570, UDP-glucoronosyl/UDP-glucosyl transferase family protein]
250072_at	AT5G17210	-2.05889	0.000587	unknown protein
260034_at	AT1G68810	-2.05889	0.009306	basic helix-loop-helix (bHLH) family protein
261927_at	AT1G22500	-2.05889	0.005553	zinc finger (C3HC4-type RING finger) family protein
264010_at	AT2G21100	-2.05889	0.004271	disease resistance-responsive protein-related / dirigent protein-related
247048_at	AT5G66560	-2.05889	0.003634	phototropic-responsive NPH3 family protein
250550_at	AT5G07870	-2.05889	0.001438	transferase family protein
245952_at	AT5G28500	-2.05889	0.00913	unknown protein
249810_at	AT5G23920	-2.05889	0.008577	unknown protein
249206_at	AT5G42630	-2.05889	0.005848	ATS (ABERRANT TESTA SHAPE); DNA binding / transcription factor
247362_at	AT5G63140	-2.05889	0.009115	ATPAP29 (ARABIDOPSIS THALIANA PURPLE ACID PHOSPHATASE 29); acid phosphatase/ protein serine/threonine phosphatase
248537_at	AT5G50100	-2.05889	0.004371	FUNCTIONS IN: molecular_function unknown; INVOLVED IN: biological_process unknown; LOCATED IN: mitochondrion; EXPRESSED IN: 22 plant structures; EXPRESSED DURING: 15 growth stages; CONTAINS InterPro DOMAIN/s: Thioredoxin-like fold (InterPro:IPR012336), Putative thiol-disulphide oxidoreductase DCC (InterPro:IPR007263); Has 598 Blast hits to 598 proteins in 152 species: Archae - 0; Bacteria - 266; …
245810_at	AT1G38065;AT1G38131	-2.05889	0.000453	[AT1G38065, unknown protein];[AT1G38131, unknown protein]
248708_at	AT5G48560	-2.05889	0.001503	basic helix-loop-helix (bHLH) family protein
266325_at	AT2G46630	-2.05889	0.006324	unknown protein
252973_s_at	AT4G38740	-2.05889	0.007871	ROC1 (ROTAMASE CYP 1); peptidyl-prolyl cis-trans isomerase
267618_at	AT2G26760	-2.05889	1.6e-05	CYCB1;4 (Cyclin B1;4); cyclin-dependent protein kinase regulator
263869_at	AT2G22000	-2.05889	0.012576	PROPEP6 (Elicitor peptide 6 precursor)
247853_at	AT5G58140	-2.05889	0.008213	PHOT2 (PHOTOTROPIN 2); FMN binding / blue light photoreceptor/ kinase/ protein serine/threonine kinase
245008_at	ATCG00360	-2.05889	0.000507	Encodes a protein required for photosystem I assembly and stability. In Chlamydomonas reinhardtii, this protein seems to act as a PSI specific chaperone facilitating the assembly of the complex by interacting with PsaA and PsaD. A loss of function mutation in tobacco leads to a loss of photosystem I.
252116_at	AT3G51510	-2.05889	0.002054	unknown protein
264442_at	AT1G27480	-2.05889	0.011145	lecithin:cholesterol acyltransferase family protein / LACT family protein
260284_at	AT1G80380	-2.05889	0.008911	phosphoribulokinase/uridine kinase-related
244984_at	ATCG00800	-2.05889	0.000679	encodes a chloroplast ribosomal protein S3, a constituent of the small subunit of the ribosomal complex
261032_at	AT1G17430	-2.05889	0.012261	hydrolase, alpha/beta fold family protein
267619_at	AT2G26730	-2.05889	0.001433	leucine-rich repeat transmembrane protein kinase, putative
249869_at	AT5G23050	-2.05889	0.000412	AAE17 (ACYL-ACTIVATING ENZYME 17); catalytic/ ligase
261639_at	AT1G50010	-2.05889	0.001967	TUA2; structural constituent of cytoskeleton
253465_at	AT4G32120	-2.05889	0.005328	galactosyltransferase family protein
256030_at	AT1G34110	-2.05889	0.003081	leucine-rich repeat transmembrane protein kinase, putative
252643_at	AT3G44590	-2.05889	0.00026	60S acidic ribosomal protein P2 (RPP2D)
246997_at	AT5G67390	-2.05889	0.000506	unknown protein
246585_at	AT5G14750	-2.05889	0.000348	ATMYB66 (MYB DOMAIN PROTEIN 66); DNA binding / protein binding / transcription factor/ transcription regulator
245637_at	AT1G25230	-2	0.003765	purple acid phosphatase family protein
255825_at	AT2G40475	-2	0.001994	unknown protein
257985_at	AT3G20810	-2	0.00523	transcription factor jumonji (jmjC) domain-containing protein
260010_at	AT1G68020	-2	0.001192	ATTPS6; alpha,alpha-trehalose-phosphate synthase (UDP-forming)/ transferase, transferring glycosyl groups / trehalose-phosphatase
248541_at	AT5G50180	-2	0.000404	protein kinase, putative
249184_at	AT5G43020	-2	0.000368	leucine-rich repeat transmembrane protein kinase, putative
249687_at	AT5G36150	-2	0.011972	ATPEN3 (putative pentacyclic triterpene synthase 3); catalytic/ lupeol synthase
263880_at	AT2G21960	-2	0.003907	unknown protein
249693_at	AT5G35750	-2	0.004796	AHK2 (ARABIDOPSIS HISTIDINE KINASE 2); cytokinin receptor/ osmosensor/ protein histidine kinase
260242_at	AT1G63650	-2	0.00372	EGL3 (ENHANCER OF GLABRA 3); DNA binding / transcription factor
263412_at	AT2G28720	-2	0.004309	histone H2B, putative
245739_at	AT1G44110	-2	0.010114	CYCA1;1 (Cyclin A1;1); cyclin-dependent protein kinase regulator
259570_at	AT1G20440	-2	8e-05	COR47 (COLD-REGULATED 47)
245725_at	AT1G73370	-2	0.01189	SUS6 (SUCROSE SYNTHASE 6); UDP-glycosyltransferase/ sucrose synthase
266335_at	AT2G32440	-2	0.007246	KAO2 (ENT-KAURENOIC ACID HYDROXYLASE 2); ent-kaurenoate oxidase/ oxygen binding
248919_at	AT5G45920	-2	0.002323	carboxylesterase/ hydrolase/ hydrolase, acting on ester bonds
262945_at	AT1G79510	-2	0.002286	unknown protein
247980_at	AT5G56860	-2	0.004691	GNC (GATA, nitrate-inducible, carbon metabolism-involved); transcription factor
250761_at	AT5G06050	-2	0.000294	dehydration-responsive protein-related
246505_at	AT5G16250	-2	0.001961	unknown protein
261483_at	AT1G14270	-2	0.002772	CAAX amino terminal protease family protein
255328_at	AT4G04350	-2	0.001964	EMB2369 (EMBRYO DEFECTIVE 2369); ATP binding / aminoacyl-tRNA ligase/ leucine-tRNA ligase/ nucleotide binding
266456_at	AT2G22770	-2	0.001862	NAI1; DNA binding / transcription factor
249817_at	AT5G23820	-2	0.00085	MD-2-related lipid recognition domain-containing protein / ML domain-containing protein
257113_at	AT3G20130	-1.94342	0.000336	CYP705A22; electron carrier/ heme binding / iron ion binding / monooxygenase/ oxygen binding
256784_at	AT3G13674	-1.94342	0.002819	unknown protein
255955_at	AT1G22030	-1.94342	0.006417	unknown protein
245080_at	AT2G23300	-1.94342	0.000414	leucine-rich repeat transmembrane protein kinase, putative
247643_at	AT5G60450	-1.94342	0.012374	ARF4 (AUXIN RESPONSE FACTOR 4); transcription factor
248140_at	AT5G54980	-1.94342	0.009372	integral membrane family protein
257222_at	AT3G27925	-1.94342	0.008616	DEGP1 (DegP protease 1); serine-type endopeptidase/ serine-type peptidase
254803_at	AT4G13100	-1.94342	0.00688	zinc finger (C3HC4-type RING finger) family protein
255558_at	AT4G01900	-1.94342	0.004422	GLB1 (GLNB1 HOMOLOG); acetylglutamate kinase regulator
258742_at	AT3G05800	-1.94342	0.000517	transcription factor
251962_at	AT3G53420	-1.94342	0.001905	PIP2A (PLASMA MEMBRANE INTRINSIC PROTEIN 2A); water channel
252047_at	AT3G52490	-1.94342	0.002525	heat shock protein-related
251710_at	AT3G56930	-1.94342	0.00546	zinc finger (DHHC type) family protein
266560_at	AT2G23950	-1.94342	0.003046	leucine-rich repeat family protein / protein kinase family protein
253794_at	AT4G28720	-1.94342	0.011489	flavin-containing monooxygenase family protein / FMO family protein
255608_at	AT4G01140	-1.94342	7.2e-05	unknown protein
244977_at	ATCG00730	-1.94342	0.00101	A chloroplast gene encoding subunit IV of the cytochrome b6/f complex
258486_at	AT3G02560	-1.94342	0.003006	40S ribosomal protein S7 (RPS7B)
263048_s_at	AT4G13500;AT2G05310	-1.94342	0.001667	[AT4G13500, unknown protein];[AT2G05310, unknown protein]
261506_at	AT1G71697	-1.94342	0.001677	ATCK1 (CHOLINE KINASE 1); choline kinase
266035_at	AT2G05990	-1.94342	0.00322	MOD1 (MOSAIC DEATH 1); enoyl-[acyl-carrier-protein] reductase (NADH)/ enoyl-[acyl-carrier-protein] reductase/ oxidoreductase
266669_at	AT2G29750	-1.94342	0.012433	UGT71C1 (UDP-GLUCOSYL TRANSFERASE 71C1); UDP-glycosyltransferase/ quercetin 3'-O-glucosyltransferase/ quercetin 7-O-glucosyltransferase/ transferase, transferring glycosyl groups
246768_at	AT5G27400	-1.94342	0.001928	unknown protein
254612_at	AT4G19100	-1.94342	0.000627	unknown protein
250205_at	AT5G14020	-1.94342	0.008787	INVOLVED IN: N-terminal protein myristoylation; LOCATED IN: vacuole; EXPRESSED IN: root; CONTAINS InterPro DOMAIN/s: BRO1 (InterPro:IPR004328); BEST Arabidopsis thaliana protein match is: unknown protein (TAIR:AT1G73390.3); Has 53 Blast hits to 53 proteins in 7 species: Archae - 0; Bacteria - 0; Metazoa - 0; Fungi - 0; Plants - 53; Viruses - 0; Other Eukaryotes - 0 (source: NCBI BLink).
258807_at	AT3G04030	-1.94342	0.009054	myb family transcription factor
260442_at	AT1G68220	-1.94342	2.7e-05	unknown protein
266984_at	AT2G39570	-1.94342	0.012903	ACT domain-containing protein
266348_at	AT2G01450	-1.94342	0.003314	ATMPK17; MAP kinase
267061_at	AT2G32480	-1.94342	0.004266	membrane-associated zinc metalloprotease, putative
262884_at	AT1G64720	-1.94342	0.010109	CP5
255413_at	AT4G03140	-1.94342	0.011171	binding / catalytic/ oxidoreductase
253402_at	AT4G32880	-1.94342	0.000323	ATHB-8 (HOMEOBOX GENE 8); DNA binding / transcription factor
263942_at	AT2G35860	-1.94342	0.002164	FLA16 (FASCICLIN-LIKE ARABINOGALACTAN PROTEIN 16 PRECURSOR)
253985_at	AT4G26220	-1.94342	0.003081	caffeoyl-CoA 3-O-methyltransferase, putative
258398_at	AT3G15360	-1.94342	0.005671	TRX-M4 (ARABIDOPSIS THIOREDOXIN M-TYPE 4); enzyme activator
250032_at	AT5G18170	-1.94342	0.002818	GDH1 (GLUTAMATE DEHYDROGENASE 1); ATP binding / glutamate dehydrogenase [NAD(P)+]/ oxidoreductase
250248_at	AT5G13740	-1.94342	0.004837	ZIF1 (ZINC INDUCED FACILITATOR 1); carbohydrate transmembrane transporter/ sugar:hydrogen symporter/ tetracycline:hydrogen antiporter
249755_at	AT5G24580	-1.94342	0.006669	copper-binding family protein
254798_at	AT4G13050	-1.94342	0.008991	acyl-(acyl carrier protein) thioesterase, putative / acyl-ACP thioesterase, putative / oleoyl-(acyl-carrier protein) hydrolase, putative / S-acyl fatty acid synthase thioesterase, putative
260392_at	AT1G74030	-1.94342	0.006041	enolase, putative
249002_at	AT5G44520	-1.94342	0.005852	ribose 5-phosphate isomerase-related
253729_at	AT4G29360	-1.94342	0.001584	glycosyl hydrolase family 17 protein
247668_at	AT5G60100	-1.88897	0.005081	APRR3 (ARABIDOPSIS PSEUDO-RESPONSE REGULATOR 3); transcription regulator/ two-component response regulator
264887_at	AT1G23120	-1.88897	0.004223	major latex protein-related / MLP-related
259366_at	AT1G13280	-1.88897	0.002693	AOC4 (ALLENE OXIDE CYCLASE 4); allene-oxide cyclase
257176_s_at	AT3G23530;AT3G23510	-1.88897	0.000172	[AT3G23530, cyclopropane fatty acid synthase, putative / CPA-FA synthase, putative];[AT3G23510, cyclopropane fatty acid synthase, putative / CPA-FA synthase, putative]
245049_at	ATCG00050	-1.88897	0.002233	Homologous to the bacterial ribosomal protein S16
248838_at	AT5G46800	-1.88897	0.006479	BOU (A BOUT DE SOUFFLE); binding / transporter
244985_at	ATCG00810	-1.88897	0.001055	encodes a chloroplast ribosomal protein L22, a constituent of the large subunit of the ribosomal complex
262400_at	AT1G49480	-1.88897	0.006513	RTV1 (related to vernalization1 1); DNA binding / transcription factor
262921_at	AT1G79430	-1.88897	0.000142	APL (ALTERED PHLOEM DEVELOPMENT); transcription factor/ transcription regulator
254207_at	AT4G24060	-1.88897	0.009445	Dof-type zinc finger domain-containing protein
249325_at	AT5G40850	-1.88897	0.010382	UPM1 (UROPHORPHYRIN METHYLASE 1); uroporphyrin-III C-methyltransferase
248527_at	AT5G50740	-1.88897	0.000215	metal ion binding
249329_at	AT5G40960	-1.88897	0.005611	unknown protein
259481_at	AT1G18970	-1.88897	0.002851	GLP4 (GERMIN-LIKE PROTEIN 4); manganese ion binding / nutrient reservoir
266391_at	AT2G41290	-1.88897	0.004744	strictosidine synthase family protein
261975_at	AT1G64640	-1.88897	0.013125	plastocyanin-like domain-containing protein
261817_at	AT1G08180	-1.88897	0.000379	unknown protein
261618_at	AT1G33110	-1.88897	0.001028	MATE efflux family protein
251010_at	AT5G02550	-1.88897	0.000718	unknown protein
258375_at	AT3G17470	-1.88897	0.006716	RelA/SpoT domain-containing protein / calcium-binding EF-hand family protein
249881_at	AT5G23190	-1.88897	0.009038	CYP86B1; electron carrier/ heme binding / iron ion binding / monooxygenase/ oxygen binding
261825_at	AT1G11545	-1.88897	0.003242	xyloglucan:xyloglucosyl transferase, putative / xyloglucan endotransglycosylase, putative / endo-xyloglucan transferase, putative
252639_at	AT3G44550	-1.88897	0.005486	FAR5 (FATTY ACID REDUCTASE 5); binding / catalytic/ oxidoreductase, acting on the CH-CH group of donors
265057_at	AT1G52140	-1.88897	0.000122	unknown protein
260855_at	AT1G21920	-1.88897	0.003483	MORN (Membrane Occupation and Recognition Nexus) repeat-containing protein /phosphatidylinositol-4-phosphate 5-kinase-related
261700_at	AT1G32690	-1.88897	0.000919	unknown protein
257247_at	AT3G24140	-1.88897	0.002874	FMA (FAMA); DNA binding / transcription activator/ transcription factor
258003_at	AT3G29030	-1.88897	0.00895	EXPA5 (EXPANSIN A5)
266895_at	AT2G26040	-1.88897	0.001097	Bet v I allergen family protein
251860_at	AT3G54660	-1.88897	0.004387	GR (GLUTATHIONE REDUCTASE); ATP binding / glutathione-disulfide reductase
246097_at	AT5G20270	-1.88897	0.007726	HHP1 (HEPTAHELICAL TRANSMEMBRANE PROTEIN1); receptor
266988_at	AT2G39310	-1.88897	0.011791	JAL22 (JACALIN-RELATED LECTIN 22)
260739_at	AT1G15000	-1.88897	0.00677	scpl50 (serine carboxypeptidase-like 50); serine-type carboxypeptidase
248454_at	AT5G51350	-1.88897	0.006333	leucine-rich repeat transmembrane protein kinase, putative
262290_at	AT1G70985	-1.88897	0.00979	hydroxyproline-rich glycoprotein family protein
262646_at	AT1G62800	-1.8365	0.001362	ASP4 (ASPARTATE AMINOTRANSFERASE 4); catalytic/ pyridoxal phosphate binding / transaminase/ transferase, transferring nitrogenous groups
262566_at	AT1G34310	-1.8365	0.006077	ARF12 (AUXIN RESPONSE FACTOR 12); transcription factor
261796_at	AT1G30440	-1.8365	0.011523	phototropic-responsive NPH3 family protein
246901_at	AT5G25630	-1.8365	0.011303	pentatricopeptide (PPR) repeat-containing protein
250496_at	AT5G09650	-1.8365	0.000246	AtPPa6 (Arabidopsis thaliana pyrophosphorylase 6); inorganic diphosphatase/ pyrophosphatase
257516_at	AT1G69040	-1.8365	0.010291	ACR4 (ACT REPEAT 4); amino acid binding
246146_at	AT5G20050	-1.8365	0.010478	protein kinase family protein
265467_at	AT2G37050	-1.8365	0.006731	kinase
250845_at	AT5G04600	-1.8365	0.003909	RNA recognition motif (RRM)-containing protein
256774_at	AT3G13760	-1.8365	0.00356	DC1 domain-containing protein
247222_at	AT5G64840	-1.8365	0.001865	ATGCN5 (A. THALIANA GENERAL CONTROL NON-REPRESSIBLE 5); transporter
264572_at	no_match	-1.8365	0.010162	no_match
267545_at	AT2G32690	-1.8365	0.000616	GRP23 (GLYCINE-RICH PROTEIN 23)
245020_at	ATCG00540	-1.8365	0.002585	Encodes cytochrome f apoprotein; involved in photosynthetic electron transport chain; encoded by the chloroplast genome and is transcriptionally repressed by a nuclear gene HCF2.
256698_at	AT3G20680	-1.8365	0.01057	unknown protein
253539_at	AT4G31450	-1.8365	0.005385	zinc finger (C3HC4-type RING finger) family protein
253533_at	AT4G31590	-1.8365	0.000284	ATCSLC5 (CELLULOSE-SYNTHASE LIKE C5); cellulose synthase/ transferase, transferring glycosyl groups
263638_at	AT2G25310	-1.8365	1.3e-05	carbohydrate binding
263867_at	AT2G36830	-1.8365	0.004906	GAMMA-TIP (GAMMA TONOPLAST INTRINSIC PROTEIN); water channel
255332_at	AT4G04340	-1.8365	0.003989	early-responsive to dehydration protein-related / ERD protein-related
260455_at	AT1G72500	-1.8365	0.000524	inter-alpha-trypsin inhibitor heavy chain-related
262236_at	AT1G48330	-1.8365	0.000163	unknown protein
249900_at	AT5G22640	-1.8365	0.010093	emb1211 (embryo defective 1211)
252548_at	AT3G45850	-1.8365	0.000201	kinesin motor protein-related
246972_s_at	AT5G24950;AT5G24960	-1.8365	0.005735	[AT5G24950, CYP71A15; electron carrier/ heme binding / iron ion binding / monooxygenase/ oxygen binding];[AT5G24960, CYP71A14; electron carrier/ heme binding / iron ion binding / monooxygenase/ oxygen binding]
248348_at	AT5G52190	-1.8365	0.005752	sugar isomerase (SIS) domain-containing protein
261296_at	AT1G48460	-1.8365	0.010156	unknown protein
253335_at	AT4G33500	-1.8365	0.007742	protein phosphatase 2C-related / PP2C-related
256443_at	AT3G10960	-1.8365	0.003249	xanthine/uracil permease family protein
252458_at	AT3G47210	-1.8365	0.00637	unknown protein
258548_at	AT3G06910	-1.8365	0.007021	ULP1A (UB-LIKE PROTEASE 1A); SUMO-specific protease/ cysteine-type peptidase
256186_at	AT1G51680	-1.8365	0.000984	4CL1 (4-COUMARATE:COA LIGASE 1); 4-coumarate-CoA ligase
262721_at	AT1G43560	-1.8365	0.000145	Aty2 (Arabidopsis thioredoxin y2); electron carrier/ protein disulfide oxidoreductase
260332_at	AT1G70470	-1.8365	0.010222	unknown protein
262151_at	AT1G52510	-1.8365	0.000909	hydrolase, alpha/beta fold family protein
265341_at	AT2G18360	-1.8365	0.008034	hydrolase, alpha/beta fold family protein
251116_at	AT3G63470	-1.8365	0.005682	scpl40 (serine carboxypeptidase-like 40); serine-type carboxypeptidase
265014_at	AT1G24430	-1.8365	0.002935	transferase/ transferase, transferring acyl groups other than amino-acyl groups
261767_s_at	AT1G15500;AT1G80300	-1.8365	0.000557	[AT1G15500, ATNTT2; ATP:ADP antiporter];[AT1G80300, NTT1 (NUCLEOTIDE TRANSPORTER 1); ATP:ADP antiporter]
253876_at	AT4G27430	-1.8365	0.000514	CIP7 (COP1-INTERACTING PROTEIN 7); transcription activator
267644_s_at	AT2G32880;AT2G32870	-1.8365	0.007455	[AT2G32880, meprin and TRAF homology domain-containing protein / MATH domain-containing protein];[AT2G32870, meprin and TRAF homology domain-containing protein / MATH domain-containing protein]
256600_at	AT3G14850	-1.8365	0.002157	unknown protein
260913_at	AT1G02500	-1.8365	0.003861	SAM1 (S-ADENOSYLMETHIONINE SYNTHETASE 1); methionine adenosyltransferase
261309_at	AT1G48598;AT1G48600	-1.8365	0.001192	[AT1G48598, CPuORF31 (Conserved peptide upstream open reading frame 31)];[AT1G48600, phosphoethanolamine N-methyltransferase 2, putative (NMT2)]
253618_at	AT4G30420	-1.8365	0.012874	nodulin MtN21 family protein
267279_at	AT2G19460	-1.78588	0.010132	unknown protein
248491_at	AT5G51010	-1.78588	0.001761	rubredoxin family protein
262969_at	AT1G75710	-1.78588	0.000898	zinc finger (C2H2 type) family protein
244959_s_at	AT2G07708;ATMG00500;ATMG00490	-1.78588	0.001162	[AT2G07708, unknown protein];[ATMG00500, hypothetical protein];[ATMG00490, hypothetical protein]
262536_at	AT1G17100	-1.78588	0.00825	SOUL heme-binding family protein
257172_at	AT3G23700	-1.78588	0.001318	S1 RNA-binding domain-containing protein
246396_at	AT1G58180	-1.78588	0.00118	carbonic anhydrase family protein / carbonate dehydratase family protein
248100_at	AT5G55180	-1.78588	0.00292	glycosyl hydrolase family 17 protein
258087_at	AT3G26060	-1.78588	0.0068	ATPRX Q; antioxidant/ peroxiredoxin
262939_s_at	AT1G79530;AT1G16300	-1.78588	0.001457	[AT1G79530, GAPCP-1 (GLYCERALDEHYDE-3-PHOSPHATE DEHYDROGENASE OF PLASTID 1); NAD or NADH binding / binding / catalytic/ glyceraldehyde-3-phosphate dehydrogenase (phosphorylating)/ glyceraldehyde-3-phosphate dehydrogenase];[AT1G16300, GAPCP-2; NAD or NADH binding / binding / catalytic/ glyceraldehyde-3-phosphate dehydrogenase (phosphorylating)/ glyceraldehyde-3-phosphate dehydrogenase]
262805_at	AT1G20900	-1.78588	0.003445	ESC (ESCAROLA); double-stranded DNA binding
264381_at	AT2G25100	-1.78588	0.001182	ribonuclease HII family protein
252132_at	AT3G50790	-1.78588	0.002129	late embryogenesis abundant protein, putative / LEA protein, putative
246108_at	AT5G28630	-1.78588	0.009273	glycine-rich protein
255637_at	AT4G00750	-1.78588	0.003915	dehydration-responsive family protein
265957_at	AT2G37300	-1.78588	0.002386	unknown protein
253699_at	AT4G29800	-1.78588	0.00525	PLP8 (PATATIN-LIKE PROTEIN 8)
249666_at	AT5G35840	-1.78588	6.9e-05	PHYC (phytochrome defective c); protein histidine kinase
264510_at	AT1G09530	-1.78588	0.01268	PIF3 (PHYTOCHROME INTERACTING FACTOR 3); DNA binding / protein binding / transcription factor/ transcription regulator
262600_at	AT1G15340	-1.78588	0.012873	MBD10; DNA binding / methyl-CpG binding
245761_at	AT1G66890	-1.78588	0.004386	FUNCTIONS IN: molecular_function unknown; INVOLVED IN: biological_process unknown; LOCATED IN: chloroplast; EXPRESSED IN: 22 plant structures; EXPRESSED DURING: 13 growth stages; BEST Arabidopsis thaliana protein match is: 50S ribosomal protein-related (TAIR:AT5G16200.1); Has 14 Blast hits to 14 proteins in 3 species: Archae - 0; Bacteria - 0; Metazoa - 0; Fungi - 0; Plants - 14; Viruses - 0; Oth…
260846_at	AT1G17300	-1.78588	0.01081	unknown protein
267294_at	AT2G23670	-1.78588	0.012785	YCF37 (Arabidopsis homolog of Synechocystis YCF37)
254442_at	AT4G21060	-1.78588	0.011772	galactosyltransferase family protein
264598_at	AT1G04610	-1.78588	0.000226	flavin-containing monooxygenase / FMO (YUCCA3)
247671_at	AT5G60210	-1.73697	0.012641	LOCATED IN: plasma membrane; EXPRESSED IN: 22 plant structures; EXPRESSED DURING: 12 growth stages; BEST Arabidopsis thaliana protein match is: myosin heavy chain-related (TAIR:AT2G37080.1); Has 77946 Blast hits to 39215 proteins in 1793 species: Archae - 845; Bacteria - 8877; Metazoa - 39997; Fungi - 6049; Plants - 2988; Viruses - 248; Other Eukaryotes - 18942 (source: NCBI BLink).
255692_at	AT4G00400	-1.73697	0.00415	GPAT8 (glycerol-3-phosphate acyltransferase 8); acyltransferase/ glycerol-3-phosphate O-acyltransferase
249320_at	AT5G40910	-1.73697	0.001583	disease resistance protein (TIR-NBS-LRR class), putative
260968_at	AT1G12250	-1.73697	0.010405	thylakoid lumenal protein-related
264938_at	AT1G60610	-1.73697	0.003241	protein binding / zinc ion binding
251295_at	AT3G62000	-1.73697	0.00593	O-methyltransferase family 3 protein
251396_at	AT3G60750	-1.73697	0.009781	transketolase, putative
263705_at	AT1G31190	-1.73697	0.001673	IMPL1 (MYO-INOSITOL MONOPHOSPHATASE LIKE 1); 3'(2'),5'-bisphosphate nucleotidase/ inositol or phosphatidylinositol phosphatase/ inositol-1(or 4)-monophosphatase
265333_at	AT2G18350	-1.73697	0.007787	AtHB24 (ARABIDOPSIS THALIANA HOMEOBOX PROTEIN 24); DNA binding / transcription factor
252971_at	AT4G38770	-1.73697	0.011682	PRP4 (PROLINE-RICH PROTEIN 4)
252089_at	AT3G52110	-1.73697	0.001614	unknown protein
260540_at	AT2G43500	-1.73697	0.012381	RWP-RK domain-containing protein
256156_at	AT3G08510	-1.73697	0.000694	ATPLC2 (PHOSPHOLIPASE C 2); phospholipase C
250333_at	AT5G11690	-1.73697	0.00022	ATTIM17-3; P-P-bond-hydrolysis-driven protein transmembrane transporter/ protein transporter
253477_at	AT4G32320	-1.73697	0.006463	APX6; L-ascorbate peroxidase/ heme binding / peroxidase
250569_at	AT5G08130	-1.73697	9.8e-05	BIM1; DNA binding / protein binding / transcription factor
265573_at	AT2G28200	-1.73697	0.001583	nucleic acid binding / transcription factor/ zinc ion binding
264947_at	AT1G77020	-1.73697	0.009741	DNAJ heat shock N-terminal domain-containing protein
255904_at	AT1G17860	-1.73697	0.006583	trypsin and protease inhibitor family protein / Kunitz family protein
246135_at	AT5G20885	-1.73697	0.008941	zinc finger (C3HC4-type RING finger) family protein
264025_at	AT2G21050	-1.73697	0.009946	amino acid permease, putative
258512_at	AT3G06510	-1.73697	0.000431	SFR2 (SENSITIVE TO FREEZING 2); beta-glucosidase/ hydrolase, hydrolyzing O-glycosyl compounds
245321_at	AT4G15545	-1.73697	0.009294	unknown protein
245396_at	AT4G14870	-1.73697	0.006728	P-P-bond-hydrolysis-driven protein transmembrane transporter
264319_at	AT1G04110	-1.73697	0.002484	SDD1 (STOMATAL DENSITY AND DISTRIBUTION); serine-type endopeptidase
253255_at	AT4G34760	-1.73697	0.008616	auxin-responsive family protein
251690_at	AT3G56510	-1.73697	0.004178	TBP-binding protein, putative
264782_at	AT1G08810	-1.73697	0.007	MYB60 (myb domain protein 60); DNA binding / transcription factor
263438_at	AT2G28660	-1.73697	0.012657	copper-binding family protein
266057_at	AT2G40660	-1.73697	0.002712	tRNA-binding region domain-containing protein
255436_at	AT4G03150	-1.73697	0.011208	unknown protein
262813_at	AT1G11670	-1.68966	0.000348	MATE efflux family protein
251701_at	AT3G56650	-1.68966	0.008113	thylakoid lumenal 20 kDa protein
253686_at	AT4G29750	-1.68966	0.002158	RNA binding
245593_at	AT4G14550	-1.68966	0.007171	IAA14 (INDOLE-3-ACETIC ACID INDUCIBLE 14); protein binding / transcription factor/ transcription repressor
262444_at	AT1G47480	-1.68966	0.004262	hydrolase
261738_s_at	AT1G47813;AT1G47820	-1.68966	0.000493	[AT1G47813, unknown protein];[AT1G47820, unknown protein]
247651_at	AT5G59870	-1.68966	0.009806	HTA6; DNA binding
246313_at	AT1G31920	-1.68966	0.010893	pentatricopeptide (PPR) repeat-containing protein
250111_at	AT5G16290	-1.68966	0.000333	acetolactate synthase small subunit, putative
251736_at	AT3G56130	-1.68966	0.001162	biotin/lipoyl attachment domain-containing protein
257911_at	AT3G25530	-1.68966	0.006604	GLYR1 (GLYOXYLATE REDUCTASE 1); 3-hydroxybutyrate dehydrogenase/ phosphogluconate dehydrogenase (decarboxylating)
257351_at	AT2G33820	-1.68966	0.001793	MBAC1; L-histidine transmembrane transporter/ L-lysine transmembrane transporter/ L-ornithine transmembrane transporter/ arginine transmembrane transporter/ binding
252078_at	AT3G51740	-1.68966	0.000366	IMK2 (INFLORESCENCE MERISTEM RECEPTOR-LIKE KINASE 2); ATP binding / kinase/ protein kinase/ protein serine/threonine kinase
246855_at	AT5G26280	-1.68966	0.01238	meprin and TRAF homology domain-containing protein / MATH domain-containing protein
252975_s_at	AT4G38430	-1.68966	0.009459	ROPGEF1; Rho guanyl-nucleotide exchange factor/ protein binding
253247_at	AT4G34610	-1.68966	0.010866	BLH6 (BELL1-LIKE HOMEODOMAIN 6); DNA binding / transcription factor
250073_at	AT5G17170	-1.68966	0.00486	ENH1 (enhancer of sos3-1); electron carrier/ metal ion binding / protein binding
258890_at	AT3G05690	-1.68966	0.008844	NF-YA2 (NUCLEAR FACTOR Y, SUBUNIT A2); transcription factor
259154_at	AT3G10260	-1.68966	0.002248	reticulon family protein
250968_at	AT5G02890	-1.68966	0.012554	transferase family protein
249284_at	AT5G41810	-1.68966	0.009581	unknown protein
264835_at	AT1G03550	-1.68966	7.1e-05	secretory carrier membrane protein (SCAMP) family protein
260076_at	AT1G73630	-1.68966	0.008879	calcium-binding protein, putative
262978_at	AT1G75780	-1.68966	0.010685	TUB1; GTP binding / GTPase/ structural molecule
250733_at	AT5G06290	-1.68966	0.002441	2-Cys Prx B (2-Cysteine peroxiredoxin B); antioxidant/ peroxiredoxin
250750_at	AT5G05870	-1.68966	0.000385	UGT76C1 (UDP-glucosyl transferase 76C1); UDP-glycosyltransferase/ cis-zeatin O-beta-D-glucosyltransferase/ cytokinin 7-beta-glucosyltransferase/ cytokinin 9-beta-glucosyltransferase/ trans-zeatin O-beta-D-glucosyltransferase/ transferase, transferring gly
256065_at	AT1G07070	-1.68966	0.000759	60S ribosomal protein L35a (RPL35aA)
259523_at	AT1G12500	-1.68966	0.005227	phosphate translocator-related
266463_at	AT2G47840	-1.64386	0.003602	tic20 protein-related
262166_at	AT1G74840	-1.64386	4.3e-05	myb family transcription factor
246847_at	AT5G26820	-1.64386	0.013075	ATIREG3 (IRON-REGULATED PROTEIN 3)
258945_at	AT3G10660	-1.64386	0.008151	CPK2 (CALMODULIN-DOMAIN PROTEIN KINASE CDPK ISOFORM 2); calmodulin-dependent protein kinase/ kinase/ protein serine/threonine kinase
245174_at	AT2G47500	-1.64386	0.000194	ATP binding / microtubule motor
258935_at	AT3G10120	-1.64386	0.006308	unknown protein
245112_at	AT2G41540	-1.64386	0.005274	GPDHC1; NAD or NADH binding / glycerol-3-phosphate dehydrogenase (NAD+)
248080_at	AT5G55380	-1.64386	0.00122	membrane bound O-acyl transferase (MBOAT) family protein / wax synthase-related
267299_at	AT2G30150	-1.64386	0.005934	UDP-glucoronosyl/UDP-glucosyl transferase family protein
245386_at	AT4G14010	-1.64386	0.00325	RALFL32 (ralf-like 32); signal transducer
253145_at	AT4G35560	-1.64386	0.009107	FUNCTIONS IN: molecular_function unknown; LOCATED IN: CUL4 RING ubiquitin ligase complex; EXPRESSED IN: 20 plant structures; EXPRESSED DURING: 7 growth stages; CONTAINS InterPro DOMAIN/s: WD40 repeat-like (InterPro:IPR011046), WD40 repeat (InterPro:IPR001680), WD40/YVTN repeat-like (InterPro:IPR015943), Lethal giant larvae (Lgl) like, C-terminal (InterPro:IPR013905); BEST Arabidopsis thaliana pro…
263550_at	AT2G17033	-1.64386	0.00046	pentatricopeptide (PPR) repeat-containing protein
264941_at	AT1G60680	-1.64386	0.001694	aldo/keto reductase family protein
261448_at	AT1G21140	-1.64386	0.001187	nodulin, putative
263686_at	AT1G26910	-1.64386	0.012795	60S ribosomal protein L10 (RPL10B)
264725_at	AT1G22885	-1.64386	0.006491	unknown protein
254874_at	AT4G11570	-1.64386	0.002029	haloacid dehalogenase-like hydrolase family protein
253011_at	AT4G37890	-1.64386	0.01245	EDA40 (embryo sac development arrest 40); protein binding / ubiquitin-protein ligase/ zinc ion binding
256020_at	AT1G58290	-1.64386	0.006019	HEMA1; glutamyl-tRNA reductase
249070_at	AT5G44030	-1.64386	0.002683	CESA4 (CELLULOSE SYNTHASE A4); cellulose synthase/ transferase, transferring glycosyl groups
247266_at	AT5G64570	-1.64386	0.005932	XYL4; hydrolase, hydrolyzing O-glycosyl compounds / xylan 1,4-beta-xylosidase
263485_at	AT2G29890	-1.64386	0.00393	VLN1 (VILLIN-LIKE 1); actin binding / actin filament binding
266330_at	AT2G01530	-1.64386	0.00498	MLP329 (MLP-LIKE PROTEIN 329); copper ion binding
267130_at	AT2G23390	-1.64386	0.005572	FUNCTIONS IN: molecular_function unknown; INVOLVED IN: biological_process unknown; EXPRESSED IN: 23 plant structures; EXPRESSED DURING: 13 growth stages; CONTAINS InterPro DOMAIN/s: Protein of unknown function DUF482 (InterPro:IPR007434), Acyl-CoA N-acyltransferase (InterPro:IPR016181); Has 1806 Blast hits to 1806 proteins in 374 species: Archae - 0; Bacteria - 707; Metazoa - 0; Fungi - 0; Plants…
251304_at	AT3G61990	-1.64386	0.002887	O-methyltransferase family 3 protein
258560_at	AT3G06020	-1.64386	0.006271	unknown protein
262850_at	AT1G14920	-1.64386	0.009918	GAI (GIBBERELLIC ACID INSENSITIVE); transcription factor
249224_at	AT5G42130	-1.64386	0.000895	mitochondrial substrate carrier family protein
259287_at	AT3G11490	-1.64386	0.004273	rac GTPase activating protein, putative
249951_at	AT5G18930	-1.64386	0.009145	BUD2 (BUSHY AND DWARF 2); adenosylmethionine decarboxylase
250272_at	AT5G13000	-1.64386	0.005131	ATGSL12 (glucan synthase-like 12); 1,3-beta-glucan synthase/ transferase, transferring glycosyl groups
256358_at	AT1G66470	-1.59946	0.011941	basic helix-loop-helix (bHLH) family protein
263495_at	AT2G42530	-1.59946	0.001205	COR15B (COLD REGULATED 15B)
263297_at	AT2G15310	-1.59946	0.005816	ATARFB1A (ADP-ribosylation factor B1A); GTP binding
247591_at	AT5G60770	-1.59946	0.00656	ATNRT2.4; nitrate transmembrane transporter
244937_at	ATCG01110	-1.59946	0.011077	Encodes the 49KDa plastid NAD(P)H dehydrogenase subunit H protein. Its transcription is regulated by an ndhF-specific plastid sigma factor, SIG4.
264613_at	AT1G04640	-1.59946	0.000429	LIP2 (LIPOYLTRANSFERASE 2); lipoyltransferase
262220_at	AT1G74740	-1.59946	0.000865	CPK30 (CALCIUM-DEPENDENT PROTEIN KINASE 30); calmodulin-dependent protein kinase/ kinase/ protein kinase
253296_at	AT4G33770	-1.59946	0.002436	inositol 1,3,4-trisphosphate 5/6-kinase family protein
264738_at	AT1G62250	-1.59946	0.009581	unknown protein
259514_at	AT1G12480	-1.59946	0.00515	OZS1 (OZONE-SENSITIVE 1); transporter
247308_at	AT5G63930	-1.59946	0.002686	leucine-rich repeat transmembrane protein kinase, putative
263845_at	AT2G37040	-1.59946	3.5e-05	pal1 (Phe ammonia lyase 1); phenylalanine ammonia-lyase
255783_at	AT1G19870	-1.59946	0.002434	iqd32 (IQ-domain 32); calmodulin binding
253700_at	AT4G29840	-1.59946	0.002852	MTO2 (METHIONINE OVER-ACCUMULATOR 2); threonine synthase
266308_at	AT2G27010	-1.59946	0.002663	CYP705A9; electron carrier/ heme binding / iron ion binding / monooxygenase/ oxygen binding
256071_at	AT1G13640	-1.59946	0.008559	phosphatidylinositol 3- and 4-kinase family protein
257191_at	AT3G13175	-1.59946	0.001323	unknown protein
247628_at	AT5G60400	-1.59946	0.004171	unknown protein
258071_s_at	AT3G26070;AT3G26080	-1.59946	0.002748	[AT3G26070, plastid-lipid associated protein PAP / fibrillin family protein];[AT3G26080, plastid-lipid associated protein PAP / fibrillin family protein]
261614_at	AT1G49760	-1.59946	1.2e-05	PAB8 (POLY(A) BINDING PROTEIN 8); RNA binding / translation initiation factor
245584_at	AT4G14940	-1.59946	0.007363	ATAO1 (ARABIDOPSIS THALIANA AMINE OXIDASE 1); amine oxidase/ copper ion binding
249290_at	AT5G41060	-1.59946	0.003023	zinc finger (DHHC type) family protein
266099_at	AT2G38040	-1.59946	0.009979	CAC3; acetyl-CoA carboxylase
253980_at	AT4G26620	-1.59946	0.000792	sucrase-related
245047_at	ATCG00020	-1.59946	0.007372	Encodes chlorophyll binding protein D1, a part of the photosystem II reaction center core
255727_at	AT1G25510	-1.59946	0.000987	aspartyl protease family protein
251864_at	AT3G54920	-1.59946	0.001308	PMR6 (powdery mildew resistant 6); lyase/ pectate lyase
262802_at	AT1G20930	-1.59946	0.000527	CDKB2;2 (CYCLIN-DEPENDENT KINASE B2;2); cyclin-dependent protein kinase/ kinase
251013_at	AT5G02540	-1.59946	0.002169	short-chain dehydrogenase/reductase (SDR) family protein
263219_at	AT1G30600	-1.55639	0.001079	subtilase family protein
262685_at	AT1G76010	-1.55639	0.003906	nucleic acid binding
260106_at	AT1G35420	-1.55639	0.010834	dienelactone hydrolase family protein
264019_at	AT2G21130	-1.55639	0.010499	peptidyl-prolyl cis-trans isomerase / cyclophilin (CYP2) / rotamase
258143_at	AT3G18170	-1.55639	0.008844	transferase, transferring glycosyl groups
256010_at	AT1G19220	-1.55639	0.006414	ARF19 (AUXIN RESPONSE FACTOR 19); DNA binding / transcription factor
255732_at	AT1G25450	-1.55639	0.008155	KCS5 (3-KETOACYL-COA SYNTHASE 5); fatty acid elongase
251118_at	AT3G63410	-1.55639	0.005376	APG1 (ALBINO OR PALE GREEN MUTANT 1); 2-methyl-6-phytyl-1,4-benzoquinone methyltransferase/ S-adenosylmethionine-dependent methyltransferase/ methyltransferase
245784_at	AT1G32190	-1.55639	8.3e-05	INVOLVED IN: N-terminal protein myristoylation; LOCATED IN: plasma membrane; EXPRESSED IN: 14 plant structures; EXPRESSED DURING: 8 growth stages; CONTAINS InterPro DOMAIN/s: Alpha/beta hydrolase fold-1 (InterPro:IPR000073); BEST Arabidopsis thaliana protein match is: unknown protein (TAIR:AT2G24320.1); Has 8192 Blast hits to 4778 proteins in 522 species: Archae - 0; Bacteria - 690; Metazoa - 533…
248042_at	AT5G55960	-1.55639	0.011344	unknown protein
262433_s_at	AT1G47500;AT1G47490	-1.55639	0.00038	[AT1G47500, ATRBP47C' (RNA-binding protein 47C'); RNA binding];[AT1G47490, ATRBP47C (ARABIDOPSIS THALIANA RNA-BINDING PROTEIN 47C); RNA binding]
248814_at	AT5G46910	-1.55639	0.005657	transcription factor jumonji (jmj) family protein
267488_at	AT2G19110	-1.55639	0.001122	HMA4; cadmium ion transmembrane transporter/ cadmium-transporting ATPase/ zinc ion transmembrane transporter
252180_at	AT3G50630	-1.55639	0.003458	KRP2 (KIP-RELATED PROTEIN 2); cyclin-dependent protein kinase inhibitor/ kinase inhibitor/ protein binding
249373_at	AT5G40670	-1.55639	0.003918	PQ-loop repeat family protein / transmembrane family protein
244989_s_at	ATCG00860;ATCG01280	-1.55639	0.001049	[ATCG00860, Encodes an unknown protein. This gene is regulated by AtSIG6 transcriptionally.];[ATCG01280, hypothetical protein]
256417_s_at	AT3G11170;AT5G05580	-1.55639	0.002056	[AT3G11170, FAD7 (FATTY ACID DESATURASE 7); omega-3 fatty acid desaturase];[AT5G05580, FAD8 (FATTY ACID DESATURASE 8); omega-3 fatty acid desaturase]
253440_at	AT4G32570	-1.55639	0.009673	TIFY8 (TIFY DOMAIN PROTEIN 8)
262040_at	AT1G80080	-1.55639	0.005287	TMM (TOO MANY MOUTHS); protein binding / receptor
260685_at	AT1G17650	-1.55639	0.008582	GLYR2 (GLYOXYLATE REDUCTASE 2); glyoxylate reductase (NADP)/ phosphogluconate dehydrogenase (decarboxylating)
253245_at	AT4G34590;AT4G34588	-1.55639	0.001804	[AT4G34590, GBF6 (G-BOX BINDING FACTOR 6); DNA binding / protein heterodimerization/ transcription factor];[AT4G34588, CPuORF2 (Conserved peptide upstream open reading frame 2)]
252510_at	AT3G46270	-1.55639	0.002681	receptor protein kinase-related
258633_at	AT3G07990	-1.55639	0.001346	SCPL27 (serine carboxypeptidase-like 27); serine-type carboxypeptidase
260972_at	AT1G53530	-1.55639	0.001056	signal peptidase I family protein
249778_at	AT5G24165	-1.55639	0.009265	unknown protein
254578_at	AT4G19410	-1.55639	0.011494	pectinacetylesterase, putative
261252_at	AT1G05810	-1.55639	0.001351	RABA5E (RAB GTPASE HOMOLOG A5E); GTP binding
246045_at	AT5G19430	-1.55639	0.007109	zinc finger (C3HC4-type RING finger) family protein
254089_at	AT4G24800	-1.55639	0.00304	MA3 domain-containing protein
255652_at	AT4G00950	-1.51457	0.003243	MEE47 (maternal effect embryo arrest 47); transcription factor
253034_at	AT4G38230	-1.51457	0.011054	CPK26; ATP binding / calcium ion binding / calmodulin-dependent protein kinase/ kinase/ protein kinase
245740_at	AT1G44100	-1.51457	0.003183	AAP5; amino acid transmembrane transporter/ basic amino acid transmembrane transporter
265330_at	AT2G18440	-1.51457	0.004807	GUT15 (GENE WITH UNSTABLE TRANSCRIPT 15); other RNA
248634_at	AT5G49030	-1.51457	0.004188	OVA2 (ovule abortion 2); ATP binding / aminoacyl-tRNA ligase/ catalytic/ isoleucine-tRNA ligase/ nucleotide binding
254877_at	AT4G11640	-1.51457	0.00391	ATSR (ARABIDOPSIS THALIANA SERINE RACEMASE); serine racemase
256128_at	AT1G18140	-1.51457	0.011711	LAC1 (Laccase 1); laccase
262647_at	AT1G14020	-1.51457	0.000566	unknown protein
246524_at	AT5G15860	-1.51457	5.9e-05	ATPCME (PRENYLCYSTEINE METHYLESTERASE); prenylcysteine methylesterase
258902_at	AT3G06483	-1.51457	0.000247	PDK (PYRUVATE DEHYDROGENASE KINASE); ATP binding / histidine phosphotransfer kinase/ pyruvate dehydrogenase (acetyl-transferring) kinase
244968_at	ATCG00640	-1.51457	0.000996	encodes a chloroplast ribosomal protein L33, a constituent of the large subunit of the ribosomal complex
266575_at	AT2G24060	-1.51457	0.004857	translation initiation factor 3 (IF-3) family protein
262235_at	AT1G48350	-1.51457	0.005174	ribosomal protein L18 family protein
252119_at	AT3G51030	-1.51457	0.00284	ATTRX1; oxidoreductase, acting on sulfur group of donors, disulfide as acceptor
248538_at	AT5G50110	-1.51457	0.006419	FUNCTIONS IN: molecular_function unknown; INVOLVED IN: cell cycle; LOCATED IN: cellular_component unknown; EXPRESSED IN: 24 plant structures; EXPRESSED DURING: 14 growth stages; CONTAINS InterPro DOMAIN/s: Glucose inhibited division protein (InterPro:IPR003682); Has 3963 Blast hits to 3963 proteins in 1297 species: Archae - 0; Bacteria - 2754; Metazoa - 2; Fungi - 0; Plants - 18; Viruses - 0; Oth…
262388_at	AT1G49320	-1.51457	0.001744	BURP domain-containing protein
261594_at	AT1G33240	-1.51457	1.7e-05	AT-GTL1 (GT2-LIKE 1); DNA binding / transcription factor
253548_at	AT4G30993	-1.51457	0.006687	unknown protein
248905_at	AT5G46250	-1.51457	0.004472	RNA recognition motif (RRM)-containing protein
256226_at	AT1G56280	-1.51457	0.007852	ATDI19
254756_at	no_match	-1.51457	0.004174	no_match
259801_at	AT1G72230	-1.51457	0.001709	plastocyanin-like domain-containing protein
249148_at	AT5G43260	-1.51457	0.00381	chaperone protein dnaJ-related
267187_s_at	AT3G59970;AT2G44160	-1.51457	0.005583	[AT3G59970, MTHFR1 (METHYLENETETRAHYDROFOLATE REDUCTASE 1); methylenetetrahydrofolate reductase (NADPH)];[AT2G44160, MTHFR2 (METHYLENETETRAHYDROFOLATE REDUCTASE 2); methylenetetrahydrofolate reductase (NADPH)]
263909_at	AT2G36490	-1.51457	1.7e-05	DML1 (DEMETER-LIKE 1); DNA N-glycosylase/ DNA-(apurinic or apyrimidinic site) lyase/ protein binding
262377_at	AT1G73110	-1.51457	0.006065	ribulose bisphosphate carboxylase/oxygenase activase, putative / RuBisCO activase, putative
257699_at	AT3G12780	-1.51457	0.003319	PGK1 (PHOSPHOGLYCERATE KINASE 1); phosphoglycerate kinase
250735_at	AT5G06280	-1.51457	0.005002	unknown protein
246239_at	AT4G36790	-1.51457	0.006913	transporter-related
257265_at	AT3G14980	-1.47393	0.001767	PHD finger transcription factor, putative
264419_s_at	AT5G33320;AT1G43310	-1.47393	0.006391	[AT5G33320, CUE1 (CAB UNDEREXPRESSED 1); antiporter/ triose-phosphate transmembrane transporter];[AT1G43310, triose phosphate/phosphate translocator-related]
266011_at	AT2G37440	-1.47393	0.01171	endonuclease/exonuclease/phosphatase family protein
259012_at	AT3G07360	-1.47393	0.008769	PUB9 (PLANT U-BOX 9); ubiquitin-protein ligase
255885_at	AT1G20330	-1.47393	0.00395	SMT2 (STEROL METHYLTRANSFERASE 2); S-adenosylmethionine-dependent methyltransferase
261751_at	AT1G76080	-1.47393	2e-05	CDSP32 (CHLOROPLASTIC DROUGHT-INDUCED STRESS PROTEIN OF 32 KD)
254679_at	no_match	-1.47393	0.006976	no_match
262426_s_at	AT1G47640	-1.47393	0.000635	unknown protein
247637_at	AT5G60600	-1.47393	0.009039	HDS (4-HYDROXY-3-METHYLBUT-2-ENYL DIPHOSPHATE SYNTHASE); 4 iron, 4 sulfur cluster binding / 4-hydroxy-3-methylbut-2-en-1-yl diphosphate synthase
244964_at	ATCG00580	-1.47393	0.004802	PSII cytochrome b559. There have been many speculations about the function of Cyt b559, but the most favored at present is that it plays a protective role by acting as an electron acceptor or electron donor under conditions when electron flow through PSII is not optimized.
250751_at	AT5G05890	-1.47393	0.005466	UDP-glucoronosyl/UDP-glucosyl transferase family protein
255718_at	AT1G32070	-1.47393	0.010279	ATNSI (NUCLEAR SHUTTLE INTERACTING); N-acetyltransferase
264956_at	AT1G76990	-1.47393	0.002835	ACR3; amino acid binding
248584_at	AT5G49960	-1.47393	0.001413	binding / catalytic
265085_at	AT1G03780	-1.47393	0.001463	targeting protein-related
263491_at	AT2G42600	-1.47393	0.001224	ATPPC2 (PHOSPHOENOLPYRUVATE CARBOXYLASE 2); catalytic/ phosphoenolpyruvate carboxylase
257643_at	AT3G25730	-1.47393	0.000597	AP2 domain-containing transcription factor, putative
261713_at	AT1G32640	-1.47393	0.008152	MYC2; DNA binding / transcription activator/ transcription factor
259070_at	AT3G11670	-1.47393	0.005411	DGD1 (DIGALACTOSYL DIACYLGLYCEROL DEFICIENT 1); UDP-galactosyltransferase/ galactolipid galactosyltransferase/ transferase, transferring glycosyl groups
258823_at	AT3G07200	-1.47393	0.004821	zinc finger (C3HC4-type RING finger) family protein
263578_at	AT2G17020	-1.47393	0.001967	F-box family protein (FBL10)
267152_at	AT2G31040	-1.47393	0.003793	ATP synthase protein I -related
256229_at	AT1G58200	-1.47393	0.003594	MSL3 (MscS-LIKE 3); ion channel
256469_at	AT1G32540	-1.47393	0.008328	LOL1 (LSD ONE LIKE 1); DNA binding
253014_at	AT4G37940	-1.47393	0.005678	AGL21; transcription factor
246007_at	AT5G08410	-1.47393	0.010899	FTRA2 (ferredoxin/thioredoxin reductase subunit A (variable subunit) 2); catalytic/ ferredoxin reductase/ ferredoxin:thioredoxin reductase/ lipoate synthase
263064_at	AT2G18162;AT2G18160	-1.47393	0.00201	[AT2G18162, CPuORF1 (Conserved peptide upstream open reading frame 1)];[AT2G18160, ATBZIP2 (ARABIDOPSIS THALIANA BASIC LEUCINE-ZIPPER 2); DNA binding / protein heterodimerization/ transcription factor]
260814_at	AT1G43710	-1.47393	0.005469	emb1075 (embryo defective 1075); carboxy-lyase/ catalytic/ pyridoxal phosphate binding
265472_at	AT2G15580	-1.47393	0.001092	zinc finger (C3HC4-type RING finger) family protein
258393_at	AT3G15480	-1.47393	0.000954	unknown protein
246915_at	AT5G25880	-1.47393	0.003166	ATNADP-ME3 (NADP-malic enzyme 3); malate dehydrogenase (oxaloacetate-decarboxylating) (NADP+)/ malic enzyme/ oxidoreductase, acting on NADH or NADPH, NAD or NADP as acceptor
248718_at	AT5G47770	-1.47393	0.003192	FPS1 (FARNESYL DIPHOSPHATE SYNTHASE 1); dimethylallyltranstransferase/ geranyltranstransferase
259611_at	AT1G52280	-1.47393	0.011223	AtRABG3d (Arabidopsis Rab GTPase homolog G3d); GTP binding
247845_at	AT5G58090	-1.4344	0.013204	glycosyl hydrolase family 17 protein
247098_at	AT5G66470	-1.4344	0.002755	GTP binding / RNA binding
248581_at	AT5G49900	-1.4344	0.003858	catalytic/ glucosylceramidase
250340_at	AT5G11840	-1.4344	0.001813	unknown protein
253162_at	AT4G35630	-1.4344	0.005521	PSAT; O-phospho-L-serine:2-oxoglutarate aminotransferase
253537_at	AT4G31560	-1.4344	0.003979	HCF153
262038_at	AT1G35580	-1.4344	0.001338	CINV1 (cytosolic invertase 1); beta-fructofuranosidase
253610_at	AT4G30200	-1.4344	0.004217	Encodes a protein with similarity to VRN5 and VIN3.Contains both a fibronectin III and PHD finger domain. VEL1 is a part of a polycomb repressive complex (PRC2) that is involved in epigenetic silencing of the FLC flowering locus.
252667_at	AT3G44200	-1.4344	0.000235	NEK6 ("NIMA (NEVER IN MITOSIS, GENE A)-RELATED 6"); ATP binding / kinase/ protein kinase/ protein serine/threonine kinase
245024_at	ATCG00120	-1.4344	0.006727	Encodes the ATPase alpha subunit, which is a subunit of ATP synthase and part of the CF1 portion which catalyzes the conversion of ADP to ATP using the proton motive force. This complex is located in the thylakoid membrane of the chloroplast.
255926_at	AT1G22190	-1.4344	0.008468	AP2 domain-containing transcription factor, putative
251008_at	AT5G02710	-1.4344	0.012642	unknown protein
262158_at	AT1G52540	-1.4344	0.000187	protein kinase, putative
255429_at	AT4G03410	-1.4344	0.001319	peroxisomal membrane protein-related
265463_at	AT2G37090	-1.4344	0.00485	IRX9 (IRREGULAR XYLEM 9); transferase, transferring glycosyl groups / xylosyltransferase
263728_at	AT1G60070	-1.4344	0.001917	binding / clathrin binding / protein binding / protein transporter
258755_at	AT3G11945	-1.4344	0.002049	homogentisate farnesyltransferase/ homogentisate geranylgeranyltransferase/ homogentisate solanesyltransferase
259896_at	AT1G71500	-1.4344	0.012156	Rieske (2Fe-2S) domain-containing protein
253197_at	AT4G35250	-1.4344	0.012169	vestitone reductase-related
250155_at	AT5G15160	-1.4344	0.006244	bHLH family protein
248344_at	AT5G52280	-1.4344	0.001637	protein transport protein-related
247442_s_at	AT5G62690;AT5G62700	-1.4344	0.001201	[AT5G62690, TUB2; GTP binding / GTPase/ structural molecule];[AT5G62700, TUB3; GTP binding / GTPase/ structural molecule]
259987_at	AT1G75030	-1.4344	0.011282	ATLP-3
259307_at	AT3G05230	-1.4344	0.001822	signal peptidase subunit family protein
247131_at	AT5G66190	-1.4344	0.011238	FNR1 (FERREDOXIN-NADP(+)-OXIDOREDUCTASE 1); NADPH dehydrogenase/ electron transporter, transferring electrons within the cyclic electron transport pathway of photosynthesis/ electron transporter, transferring electrons within the noncyclic electron transp
264316_at	AT1G70330	-1.4344	0.000163	ENT1,AT (EQUILIBRATIVE NUCLEOTIDE TRANSPORTER 1); nucleoside transmembrane transporter/ nucleoside transmembrane transporter, against a concentration gradient
244980_at	ATCG00760	-1.4344	0.000978	encodes a chloroplast ribosomal protein L36, a constituent of the large subunit of the ribosomal complex
259412_at	AT1G13450	-1.4344	0.007016	DNA binding protein GT-1
265173_at	AT1G23530	-1.4344	1.9e-05	unknown protein
259577_at	AT1G35340	-1.4344	0.003575	ATP-dependent protease La (LON) domain-containing protein
253326_at	AT4G33440	-1.4344	0.001905	glycoside hydrolase family 28 protein / polygalacturonase (pectinase) family protein
257749_at	AT3G18780	-1.39593	0.002261	ACT2 (ACTIN 2); structural constituent of cytoskeleton
259671_at	AT1G52290	-1.39593	0.01009	protein kinase family protein
246056_at	AT5G08390	-1.39593	0.004425	FUNCTIONS IN: molecular_function unknown; INVOLVED IN: biological_process unknown; LOCATED IN: CUL4 RING ubiquitin ligase complex; EXPRESSED IN: 22 plant structures; EXPRESSED DURING: 13 growth stages; CONTAINS InterPro DOMAIN/s: WD40 repeat-like (InterPro:IPR011046), WD40 repeat, region (InterPro:IPR017986), WD40/YVTN repeat-like (InterPro:IPR015943), WD40 repeat (InterPro:IPR001680); BEST Arabi…
259845_at	AT1G73590	-1.39593	0.002738	PIN1 (PIN-FORMED 1); transporter
247193_at	AT5G65380	-1.39593	0.004132	ripening-responsive protein, putative
262502_at	AT1G21600	-1.39593	0.001664	PTAC6 (PLASTID TRANSCRIPTIONALLY ACTIVE6)
258481_at	AT3G02600	-1.39593	0.003614	LPP3 (LIPID PHOSPHATE PHOSPHATASE 3); phosphatidate phosphatase
256191_at	AT1G30130	-1.39593	0.000291	unknown protein
246267_at	AT1G31812	-1.39593	0.004396	ACBP6 (acyl-CoA-binding protein 6); acyl-CoA binding / phosphatidylcholine binding
257573_at	AT2G33990	-1.39593	0.009604	iqd9 (IQ-domain 9); calmodulin binding
247465_at	AT5G62190	-1.39593	0.007202	PRH75; ATP-dependent helicase/ DEAD/H-box RNA helicase binding
261457_at	AT1G21065	-1.39593	0.000517	unknown protein
259771_at	AT1G29470	-1.39593	0.001598	dehydration-responsive protein-related
253709_at	AT4G29220	-1.39593	0.000577	PFK1 (PHOSPHOFRUCTOKINASE 1); 6-phosphofructokinase
251584_at	AT3G58620	-1.39593	0.01183	TTL4 (Tetratricopetide-repeat Thioredoxin-Like 4); binding
245790_at	AT1G32200	-1.39593	0.003108	ATS1; glycerol-3-phosphate O-acyltransferase
247931_at	AT5G57040	-1.39593	0.010501	lactoylglutathione lyase family protein / glyoxalase I family protein
264654_s_at	AT1G08900;AT1G08890	-1.39593	0.004447	[AT1G08900, carbohydrate transmembrane transporter];[AT1G08890, sugar transporter family protein]
260073_at	AT1G73660	-1.39593	0.006841	protein kinase family protein
247077_at	AT5G66420	-1.39593	0.002768	LOCATED IN: cellular_component unknown; EXPRESSED IN: 23 plant structures; EXPRESSED DURING: 13 growth stages; CONTAINS InterPro DOMAIN/s: Uncharacterised conserved protein UCP033271 (InterPro:IPR008322), TIM-barrel signal transduction protein, predicted (InterPro:IPR009215); Has 809 Blast hits to 807 proteins in 200 species: Archae - 4; Bacteria - 603; Metazoa - 0; Fungi - 61; Plants - 24; Virus…
258719_at	AT3G09540	-1.39593	0.00115	pectate lyase family protein
260053_at	AT1G78120	-1.39593	0.00063	tetratricopeptide repeat (TPR)-containing protein
252267_at	AT3G49640	-1.39593	0.009607	FAD binding / catalytic/ tRNA dihydrouridine synthase
248273_at	AT5G53500	-1.35845	0.006031	WD-40 repeat family protein
255638_at	AT4G00740	-1.35845	0.00933	dehydration-responsive protein-related
267471_at	AT2G30390	-1.35845	0.007926	FC2 (FERROCHELATASE 2); ferrochelatase
264696_at	AT1G70230	-1.35845	0.000707	unknown protein
257896_at	AT3G16920	-1.35845	0.002312	chitinase
263900_at	AT2G36290	-1.35845	0.00842	hydrolase, alpha/beta fold family protein
264144_at	AT1G79320	-1.35845	0.008592	AtMC6 (metacaspase 6); cysteine-type endopeptidase
253805_at	AT4G28260	-1.35845	0.004023	unknown protein
255617_at	AT4G01330	-1.35845	0.009326	ATP binding / kinase/ protein kinase/ protein serine/threonine kinase/ protein tyrosine kinase
256899_at	AT3G24660	-1.35845	0.003993	TMKL1 (transmembrane kinase-like 1); ATP binding / kinase/ protein serine/threonine kinase
248391_at	AT5G52030	-1.35845	0.001439	TraB protein-related
267078_at	AT2G40960	-1.35845	0.007726	nucleic acid binding
255982_at	AT1G34000	-1.35845	0.004662	OHP2 (ONE-HELIX PROTEIN 2)
260766_at	AT1G48960	-1.35845	0.001545	universal stress protein (USP) family protein
265445_at	AT2G37190	-1.35845	0.002842	60S ribosomal protein L12 (RPL12A)
249473_at	AT5G39340	-1.35845	0.000209	AHP3 (HISTIDINE-CONTAINING PHOSPHOTRANSMITTER 3); histidine phosphotransfer kinase
262729_at	AT1G75840	-1.35845	0.000298	ARAC5 (RAC-LIKE GTP BINDING PROTEIN 5); GTP binding / GTPase
266673_at	AT2G29630	-1.35845	0.005661	THIC (ThiaminC); ADP-ribose pyrophosphohydrolase/ catalytic/ iron-sulfur cluster binding
251285_at	AT3G61770	-1.35845	0.006688	FUNCTIONS IN: molecular_function unknown; INVOLVED IN: biological_process unknown; LOCATED IN: chloroplast; EXPRESSED IN: 22 plant structures; EXPRESSED DURING: 13 growth stages; CONTAINS InterPro DOMAIN/s: Acid phosphatase/vanadium-dependent haloperoxidase related (InterPro:IPR003832); BEST Arabidopsis thaliana protein match is: unknown protein (TAIR:AT1G67600.1); Has 613 Blast hits to 613 prote…
248335_at	AT5G52450	-1.35845	0.010895	MATE efflux protein-related
249456_at	AT5G39410	-1.35845	0.0112	binding / catalytic
245199_at	AT1G67730	-1.35845	0.001505	YBR159; ketoreductase/ oxidoreductase
262168_at	AT1G74730	-1.35845	0.010504	unknown protein
260975_at	AT1G53430	-1.35845	0.011589	leucine-rich repeat family protein / protein kinase family protein
255250_at	AT4G05100	-1.35845	0.00121	AtMYB74 (myb domain protein 74); DNA binding / transcription factor
254659_at	AT4G18240	-1.35845	0.002799	ATSS4; transferase, transferring glycosyl groups
245616_at	AT4G14480	-1.35845	0.007641	protein kinase family protein
254930_at	AT4G11450	-1.35845	0.002157	unknown protein
257072_at	AT3G14220	-1.35845	0.002194	GDSL-motif lipase/hydrolase family protein
249860_at	AT5G22860	-1.35845	0.00745	serine carboxypeptidase S28 family protein
263703_at	AT1G31170	-1.35845	0.000314	SRX (SULFIREDOXIN); DNA binding / oxidoreductase, acting on sulfur group of donors
249911_at	AT5G22740	-1.32193	0.001354	ATCSLA02; mannan synthase/ transferase, transferring glycosyl groups
251993_at	AT3G52960	-1.32193	0.010549	peroxiredoxin type 2, putative
246346_at	AT3G56810	-1.32193	0.002062	unknown protein
261605_at	AT1G49580	-1.32193	0.007735	calcium-dependent protein kinase, putative / CDPK, putative
264873_at	AT1G24100	-1.32193	0.005223	UGT74B1 (UDP-glucosyl transferase 74B1); UDP-glycosyltransferase/ thiohydroximate beta-D-glucosyltransferase/ transferase, transferring glycosyl groups
248443_at	AT5G51310	-1.32193	0.00433	gibberellin 20-oxidase-related
249768_at	AT5G24100	-1.32193	0.003592	leucine-rich repeat transmembrane protein kinase, putative
263875_at	AT2G21970	-1.32193	0.004463	SEP2 (STRESS ENHANCED PROTEIN 2); chlorophyll binding
267517_at	AT2G30520	-1.32193	0.003215	RPT2 (ROOT PHOTOTROPISM 2); protein binding
260483_at	AT1G11000	-1.32193	0.012861	MLO4 (MILDEW RESISTANCE LOCUS O 4); calmodulin binding
254577_at	AT4G19450	-1.32193	0.008905	nodulin-related
264697_at	AT1G70210	-1.32193	0.003964	CYCD1;1 (CYCLIN D1;1); cyclin-dependent protein kinase regulator
245929_at	AT5G24760	-1.32193	0.003363	alcohol dehydrogenase, putative
250326_at	AT5G12080	-1.32193	0.012722	MSL10 (MECHANOSENSITIVE CHANNEL OF SMALL CONDUCTANCE-LIKE 10); mechanically-gated ion channel
245368_at	AT4G15510	-1.32193	0.012569	photosystem II reaction center PsbP family protein
260125_at	AT1G36390	-1.32193	0.000751	co-chaperone grpE family protein
247850_at	AT5G58150	-1.32193	0.006491	leucine-rich repeat transmembrane protein kinase, putative
253225_at	AT4G35020	-1.32193	0.001727	ARAC3 (ARABIDOPSIS RAC-LIKE 3); GTP binding / GTPase
264331_at	AT1G04130	-1.32193	0.004844	tetratricopeptide repeat (TPR)-containing protein
265305_at	AT2G20340	-1.32193	0.011531	tyrosine decarboxylase, putative
256535_at	AT1G33280	-1.32193	0.003018	ANAC015 (Arabidopsis NAC domain containing protein 15); transcription factor
254505_at	AT4G19985	-1.32193	0.003459	GCN5-related N-acetyltransferase (GNAT) family protein
259104_at	AT3G02170	-1.32193	0.010876	LNG2 (LONGIFOLIA2)
257717_at	AT3G18390	-1.32193	0.00789	EMB1865 (embryo defective 1865); RNA binding
261871_at	AT1G11440	-1.32193	0.005161	FUNCTIONS IN: molecular_function unknown; INVOLVED IN: biological_process unknown; LOCATED IN: cellular_component unknown; EXPRESSED IN: 22 plant structures; EXPRESSED DURING: 13 growth stages; BEST Arabidopsis thaliana protein match is: glycine-rich protein (TAIR:AT3G29075.1); Has 22740 Blast hits to 8622 proteins in 417 species: Archae - 22; Bacteria - 573; Metazoa - 11353; Fungi - 2147; Plants…
263619_at	AT2G04650	-1.32193	0.004301	ADP-glucose pyrophosphorylase family protein
252952_at	AT4G38710	-1.32193	0.003177	glycine-rich protein
256650_at	AT3G13620	-1.32193	0.010538	amino acid permease family protein
254021_at	AT4G25650	-1.32193	3.3e-05	ACD1-LIKE (ACD1-LIKE); 2 iron, 2 sulfur cluster binding / electron carrier/ oxidoreductase
260466_at	AT1G10900	-1.32193	0.00958	phosphatidylinositol-4-phosphate 5-kinase family protein
250531_at	AT5G08650	-1.32193	0.00544	GTP-binding protein LepA, putative
261635_at	AT1G50020	-1.32193	0.012124	unknown protein
253158_at	AT4G35780	-1.32193	0.005963	protein kinase family protein
250837_at	AT5G04620	-1.2863	0.004619	ATBIOF (BIOTIN F); 8-amino-7-oxononanoate synthase/ transaminase
263000_at	AT1G54350	-1.2863	0.001956	ABC transporter family protein
257021_at	AT3G19710	-1.2863	0.005517	BCAT4 (BRANCHED-CHAIN AMINOTRANSFERASE4); catalytic/ methionine-oxo-acid transaminase
257831_at	AT3G26710	-1.2863	0.003233	CCB1 (COFACTOR ASSEMBLY OF COMPLEX C)
246735_at	AT5G27670	-1.2863	0.007911	HTA7 (HISTONE H2A 7); DNA binding
247370_at	AT5G63320	-1.2863	0.012432	FUNCTIONS IN: molecular_function unknown; INVOLVED IN: biological_process unknown; LOCATED IN: cellular_component unknown; EXPRESSED IN: 24 plant structures; EXPRESSED DURING: 14 growth stages; CONTAINS InterPro DOMAIN/s: Bromodomain (InterPro:IPR001487); BEST Arabidopsis thaliana protein match is: ATBET9 (Arabidopsis thaliana Bromodomain and Extraterminal Domain protein 9); DNA binding (TAIR:AT5…
246523_at	AT5G15850	-1.2863	0.003876	COL1 (constans-like 1); transcription factor/ zinc ion binding
248767_at	AT5G47710	-1.2863	0.011276	C2 domain-containing protein
251788_at	AT3G55420	-1.2863	0.005787	unknown protein
265486_at	no_match	-1.2863	0.001138	no_match
253064_at	AT4G37730	-1.2863	0.010983	AtbZIP7 (Arabidopsis thaliana basic leucine-zipper 7); DNA binding / transcription factor
255659_at	AT4G00895	-1.2863	0.012495	ATP synthase delta chain-related
253263_at	AT4G34000	-1.2863	0.004628	ABF3 (ABSCISIC ACID RESPONSIVE ELEMENTS-BINDING FACTOR 3); DNA binding / protein binding / transcription activator/ transcription factor
267310_at	AT2G34680	-1.2863	0.003957	AIR9; protein binding
248449_at	AT5G51110	-1.2863	0.007862	4-alpha-hydroxytetrahydrobiopterin dehydratase
248469_at	AT5G50820	-1.2863	0.005108	anac097 (Arabidopsis NAC domain containing protein 97); transcription factor
264371_at	AT1G12090	-1.2863	0.009028	ELP (EXTENSIN-LIKE PROTEIN); lipid binding
249574_at	AT5G37660	-1.2863	0.005612	PDLP7 (PLASMODESMATA-LOCATED PROTEIN 7)
267504_at	AT2G45530	-1.2863	0.00071	zinc finger (C3HC4-type RING finger) family protein
261421_at	AT1G18840	-1.2863	0.008968	IQD30; calmodulin binding
257181_at	AT3G13190	-1.2863	0.002617	myosin heavy chain-related
253814_at	AT4G28290	-1.2863	0.010661	unknown protein
259005_at	AT3G01930	-1.2863	1e-06	nodulin family protein
265867_at	AT2G01620	-1.2863	0.004834	MEE11 (maternal effect embryo arrest 11)
253193_at	AT4G35380	-1.2863	0.012397	guanine nucleotide exchange family protein
251113_at	AT5G01370	-1.2863	0.001816	unknown protein
245477_at	AT4G16110	-1.25154	0.008088	ARR2 (ARABIDOPSIS RESPONSE REGULATOR 2); transcription factor/ two-component response regulator
257621_at	AT3G20410	-1.25154	0.012096	CPK9 (calmodulin-domain protein kinase 9); calmodulin-dependent protein kinase/ kinase
267315_at	no_match	-1.25154	0.004918	no_match
246322_at	AT1G16680	-1.25154	0.012247	DNAJ heat shock N-terminal domain-containing protein / S-locus protein, putative
263199_at	AT1G05590	-1.25154	0.00716	HEXO2 (BETA-HEXOSAMINIDASE 2); beta-N-acetylhexosaminidase/ hexosaminidase/ hydrolase, hydrolyzing O-glycosyl compounds
246730_at	AT5G28060	-1.25154	0.009869	40S ribosomal protein S24 (RPS24B)
262414_at	AT1G49430	-1.25154	0.010228	LACS2 (LONG-CHAIN ACYL-COA SYNTHETASE 2); long-chain-fatty-acid-CoA ligase
267636_at	AT2G42110	-1.25154	0.006621	unknown protein
254807_at	AT4G12700	-1.25154	0.007213	unknown protein
246110_at	AT5G20140	-1.25154	0.00433	SOUL heme-binding family protein
266121_at	AT2G02160	-1.25154	0.003514	zinc finger (CCCH-type) family protein
251823_at	AT3G55080	-1.25154	0.001051	SET domain-containing protein
258124_at	AT3G18215	-1.25154	0.003935	unknown protein
251355_at	AT3G61100	-1.25154	0.002423	unknown protein
266295_at	AT2G29550	-1.25154	0.005688	TUB7; structural constituent of cytoskeleton
245021_at	ATCG00550	-1.25154	0.002654	PSII component
248572_at	AT5G49800	-1.25154	0.010819	FUNCTIONS IN: molecular_function unknown; INVOLVED IN: biological_process unknown; EXPRESSED IN: 12 plant structures; EXPRESSED DURING: 4 anthesis, F mature embryo stage, C globular stage, petal differentiation and expansion stage, D bilateral stage; CONTAINS InterPro DOMAIN/s: Lipid-binding START (InterPro:IPR002913); Has 156 Blast hits to 155 proteins in 50 species: Archae - 0; Bacteria - 14; M…
266507_at	AT2G47860	-1.25154	0.001608	phototropic-responsive NPH3 family protein
255864_at	AT2G30320	-1.25154	0.001153	tRNA pseudouridine synthase family protein
248238_at	AT5G53900	-1.25154	0.002307	unknown protein
257079_at	AT3G15240	-1.21759	0.005256	unknown protein
254763_at	AT4G13170	-1.21759	0.005035	60S ribosomal protein L13A (RPL13aC)
245528_at	AT4G15530	-1.21759	0.000364	PPDK (pyruvate orthophosphate dikinase); kinase/ pyruvate, phosphate dikinase
253200_at	AT4G34720	-1.21759	0.010519	AVA-P1; ATPase/ proton-transporting ATPase, rotational mechanism
246005_at	AT5G08415	-1.21759	0.000844	lipoic acid synthase family protein
250074_at	AT5G17310	-1.21759	0.01048	UTP--glucose-1-phosphate uridylyltransferase, putative / UDP-glucose pyrophosphorylase, putative / UGPase, putative
246765_at	AT5G27330	-1.21759	0.00999	LOCATED IN: endoplasmic reticulum; EXPRESSED IN: 22 plant structures; EXPRESSED DURING: 12 growth stages; CONTAINS InterPro DOMAIN/s: Prefoldin (InterPro:IPR009053); BEST Arabidopsis thaliana protein match is: unknown protein (TAIR:AT3G05130.1); Has 110457 Blast hits to 56483 proteins in 2051 species: Archae - 1653; Bacteria - 15111; Metazoa - 52441; Fungi - 7858; Plants - 4309; Viruses - 584; Ot…
246144_at	AT5G20110	-1.21759	0.006292	dynein light chain, putative
258619_at	AT3G02780	-1.21759	0.001566	IPP2 (ISOPENTENYL PYROPHOSPHATE:DIMETHYLALLYL PYROPHOSPHATE ISOMERASE 2); isopentenyl-diphosphate delta-isomerase
264728_at	AT1G22850	-1.21759	0.006752	INVOLVED IN: biological_process unknown; LOCATED IN: chloroplast; EXPRESSED IN: 22 plant structures; EXPRESSED DURING: 15 growth stages; CONTAINS InterPro DOMAIN/s: SNARE associated Golgi protein (InterPro:IPR015414); BEST Arabidopsis thaliana protein match is: unknown protein (TAIR:AT1G03260.1); Has 3098 Blast hits to 3098 proteins in 664 species: Archae - 6; Bacteria - 1614; Metazoa - 182; Fung…
256308_s_at	AT1G30420;AT1G30410	-1.21759	0.007548	[AT1G30420, ATMRP12; ATPase, coupled to transmembrane movement of substances];[AT1G30410, ATMRP13; ATPase, coupled to transmembrane movement of substances]
257141_at	AT3G28900	-1.21759	0.001545	60S ribosomal protein L34 (RPL34C)
266359_at	AT2G32260	-1.21759	0.000706	cholinephosphate cytidylyltransferase, putative / phosphorylcholine transferase, putative / CTP:phosphocholine cytidylyltransferase, putative
258699_at	AT3G09470	-1.21759	0.005981	FUNCTIONS IN: molecular_function unknown; INVOLVED IN: biological_process unknown; LOCATED IN: cellular_component unknown; EXPRESSED IN: 23 plant structures; EXPRESSED DURING: 13 growth stages; CONTAINS InterPro DOMAIN/s: Protein of unknown function DUF895, eukaryotic (InterPro:IPR010291), Major facilitator superfamily, general substrate transporter (InterPro:IPR016196); Has 638 Blast hits to 624…
247783_at	AT5G58800	-1.21759	0.000947	quinone reductase family protein
253545_at	AT4G31310	-1.21759	0.002776	avirulence-responsive protein-related / avirulence induced gene (AIG) protein-related
247069_at	AT5G66920	-1.21759	0.000974	sks17 (SKU5 Similar 17); copper ion binding / oxidoreductase
261417_at	AT1G07700	-1.21759	0.009685	thioredoxin family protein
262955_at	AT1G54520	-1.21759	0.009637	unknown protein
261803_at	AT1G30500	-1.21759	0.001789	NF-YA7 (NUCLEAR FACTOR Y, SUBUNIT A7); specific transcriptional repressor/ transcription factor
244979_at	ATCG00750	-1.21759	0.004365	30S chloroplast ribosomal protein S11
258326_at	AT3G22760	-1.21759	0.005888	SOL1; transcription factor
257875_at	AT3G17120	-1.21759	0.005153	unknown protein
249033_at	AT5G44920	-1.21759	0.010789	Toll-Interleukin-Resistance (TIR) domain-containing protein
248347_at	AT5G52250	-1.21759	0.002705	transducin family protein / WD-40 repeat family protein
259092_at	AT3G04870	-1.21759	0.005406	ZDS (ZETA-CAROTENE DESATURASE); carotene 7,8-desaturase
247679_at	AT5G59540	-1.21759	0.006471	oxidoreductase, 2OG-Fe(II) oxygenase family protein
254260_at	AT4G23440	-1.21759	0.003038	nucleoside-triphosphatase/ nucleotide binding / transmembrane receptor
251880_at	AT3G54290	-1.21759	0.00189	FUNCTIONS IN: molecular_function unknown; INVOLVED IN: N-terminal protein myristoylation; LOCATED IN: chloroplast; EXPRESSED IN: 23 plant structures; EXPRESSED DURING: 13 growth stages; CONTAINS InterPro DOMAIN/s: Haemerythrin/HHE cation-binding motif (InterPro:IPR012312); Has 35 Blast hits to 35 proteins in 7 species: Archae - 0; Bacteria - 2; Metazoa - 0; Fungi - 0; Plants - 32; Viruses - 0; Ot…
257894_at	AT3G17100	-1.21759	0.004448	transcription factor
251089_at	AT5G01390	-1.21759	0.00247	DNAJ heat shock protein, putative
251807_at	AT3G55400	-1.18442	0.012748	OVA1 (OVULE ABORTION 1); ATP binding / aminoacyl-tRNA ligase/ methionine-tRNA ligase/ nucleotide binding
259160_at	AT3G05410	-1.18442	0.013154	unknown protein
250281_at	AT5G13240	-1.18442	0.000902	transcription regulator
260490_at	AT1G51500	-1.18442	0.000166	CER5 (ECERIFERUM 5); ATPase, coupled to transmembrane movement of substances
252536_at	AT3G45700	-1.18442	0.006458	proton-dependent oligopeptide transport (POT) family protein
251175_at	AT3G63250	-1.18442	0.000152	HMT2 (HOMOCYSTEINE METHYLTRANSFERASE 2); homocysteine S-methyltransferase
264986_at	AT1G27130	-1.18442	0.002316	ATGSTU13 (ARABIDOPSIS THALIANA GLUTATHIONE S-TRANSFERASE TAU 13); glutathione transferase
263236_at	AT1G10470	-1.18442	0.006835	ARR4 (RESPONSE REGULATOR 4); protein binding / transcription regulator/ two-component response regulator
244991_s_at	ATCG01250;ATCG00890	-1.18442	0.011534	[ATCG01250, NADH dehydrogenase ND2];[ATCG00890, NADH dehydrogenase ND2]
253422_at	AT4G32240	-1.18442	0.011707	unknown protein
261970_at	AT1G65960	-1.18442	0.008236	GAD2 (GLUTAMATE DECARBOXYLASE 2); calmodulin binding / glutamate decarboxylase
247450_at	AT5G62350	-1.18442	0.002016	invertase/pectin methylesterase inhibitor family protein / DC 1.2 homolog (FL5-2I22)
248828_at	AT5G47110	-1.18442	0.00878	lil3 protein, putative
263952_s_at	AT2G35830;AT2G35810	-1.18442	0.00043	[AT2G35830, unknown protein];[AT2G35810, unknown protein]
250922_at	AT5G03345	-1.18442	2e-06	FUNCTIONS IN: molecular_function unknown; INVOLVED IN: biological_process unknown; LOCATED IN: endomembrane system; EXPRESSED IN: 24 plant structures; EXPRESSED DURING: 15 growth stages; CONTAINS InterPro DOMAIN/s: Magnesium transporter (InterPro:IPR018937); Has 130 Blast hits to 130 proteins in 52 species: Archae - 0; Bacteria - 0; Metazoa - 98; Fungi - 0; Plants - 25; Viruses - 0; Other Eukaryo…
251257_at	AT3G62290	-1.18442	0.001437	ATARFA1E (ADP-ribosylation factor A1E); GTP binding / phospholipase activator/ protein binding
260801_at	AT1G78430	-1.18442	0.001251	FUNCTIONS IN: molecular_function unknown; INVOLVED IN: biological_process unknown; LOCATED IN: cellular_component unknown; EXPRESSED IN: 16 plant structures; EXPRESSED DURING: 8 growth stages; BEST Arabidopsis thaliana protein match is: tropomyosin-related (TAIR:AT1G17140.2); Has 36552 Blast hits to 19717 proteins in 1278 species: Archae - 377; Bacteria - 3766; Metazoa - 19812; Fungi - 2701; Plan…
252287_at	AT3G49080	-1.18442	0.01032	ribosomal protein S9 family protein
262264_at	AT1G42470	-1.18442	0.009842	patched family protein
264693_at	AT1G69970	-1.18442	0.006273	CLE26 (CLAVATA3/ESR-RELATED 26); protein binding / receptor binding
245284_at	AT4G14210	-1.18442	0.00877	PDS3 (PHYTOENE DESATURASE 3); phytoene dehydrogenase
267127_at	AT2G23610	-1.18442	0.005599	MES3 (METHYL ESTERASE 3); hydrolase, acting on ester bonds / methyl indole-3-acetate esterase/ methyl jasmonate esterase
260436_at	AT1G68140	-1.18442	0.00104	FUNCTIONS IN: molecular_function unknown; INVOLVED IN: biological_process unknown; EXPRESSED IN: 23 plant structures; EXPRESSED DURING: 13 growth stages; CONTAINS InterPro DOMAIN/s: Protein of unknown function DUF1644 (InterPro:IPR012866); BEST Arabidopsis thaliana protein match is: protein binding / zinc ion binding (TAIR:AT4G08460.2); Has 145 Blast hits to 136 proteins in 7 species: Archae - 0;…
246891_at	AT5G25490	-1.18442	0.009906	zinc finger (Ran-binding) family protein
263325_at	AT2G04240	-1.18442	0.010331	XERICO; protein binding / zinc ion binding
257794_at	AT3G27050	-1.18442	0.005786	unknown protein
249734_at	AT5G24360	-1.18442	0.003115	IRE1-1 (INOSITOL REQUIRING 1-1); ATP binding / endoribonuclease, producing 5'-phosphomonoesters / kinase/ protein kinase/ protein serine/threonine kinase
247161_at	AT5G65810	-1.18442	0.013088	unknown protein
245361_at	AT4G17790	-1.18442	0.001276	INVOLVED IN: biological_process unknown; EXPRESSED IN: 23 plant structures; EXPRESSED DURING: 15 growth stages; CONTAINS InterPro DOMAIN/s: SNARE associated Golgi protein (InterPro:IPR015414); BEST Arabidopsis thaliana protein match is: unknown protein (TAIR:AT1G71940.1); Has 2258 Blast hits to 2258 proteins in 517 species: Archae - 4; Bacteria - 1129; Metazoa - 188; Fungi - 22; Plants - 104; Vir…
250150_at	AT5G14710	-1.152	0.001825	FUNCTIONS IN: molecular_function unknown; INVOLVED IN: biological_process unknown; LOCATED IN: cellular_component unknown; EXPRESSED IN: 22 plant structures; EXPRESSED DURING: 13 growth stages; CONTAINS InterPro DOMAIN/s: Proteasome assembly chaperone 3 (InterPro:IPR018788); Has 85 Blast hits to 85 proteins in 29 species: Archae - 0; Bacteria - 0; Metazoa - 53; Fungi - 2; Plants - 27; Viruses - 0…
251068_at	AT5G01920	-1.152	0.004578	STN8; kinase/ protein kinase
250704_at	AT5G06265	-1.152	0.000922	hyaluronan mediated motility receptor-related
247735_at	AT5G59440	-1.152	0.012615	ZEU1 (ZEUS1); ATP binding / thymidylate kinase
251900_at	AT3G54430	-1.152	0.010458	SRS6 (SHI-RELATED SEQUENCE 6)
252189_at	AT3G50070	-1.152	0.001241	CYCD3;3 (CYCLIN D3;3); cyclin-dependent protein kinase
246745_at	AT5G27770	-1.152	0.007984	60S ribosomal protein L22 (RPL22C)
251391_at	AT3G60910	-1.152	0.008398	catalytic/ methyltransferase
263846_at	AT2G36990	-1.152	0.008765	SIGF (RNA POLYMERASE SIGMA-SUBUNIT F); DNA binding / DNA-directed RNA polymerase/ sigma factor/ transcription factor
264086_at	AT2G31190	-1.152	0.005417	LOCATED IN: mitochondrion, plastid, chloroplast envelope; EXPRESSED IN: 24 plant structures; EXPRESSED DURING: 14 growth stages; CONTAINS InterPro DOMAIN/s: Protein of unknown function DUF647 (InterPro:IPR006968); BEST Arabidopsis thaliana protein match is: emb1879 (embryo defective 1879) (TAIR:AT5G49820.1); Has 274 Blast hits to 274 proteins in 92 species: Archae - 0; Bacteria - 2; Metazoa - 96;…
256411_at	AT1G66670	-1.152	0.007372	CLPP3; serine-type endopeptidase
264897_at	AT1G23220	-1.152	0.000125	dynein light chain type 1 family protein
265394_at	AT2G20725	-1.152	0.012781	CAAX amino terminal protease family protein
263650_at	AT1G04360	-1.152	0.002118	zinc finger (C3HC4-type RING finger) family protein
256997_at	AT3G14067	-1.152	0.011973	subtilase family protein
254466_at	AT4G20430	-1.152	0.003931	subtilase family protein
264942_at	AT1G67340	-1.152	0.011058	zinc finger (MYND type) family protein / F-box family protein
249289_at	AT5G41040	-1.152	0.00978	transferase family protein
261926_at	AT1G22530	-1.152	0.001221	PATL2 (PATELLIN 2); transporter
250442_at	AT5G10490	-1.152	0.006859	MSL2 (MscS-LIKE 2); ion channel
248986_at	AT5G45170	-1.152	0.000967	CbbY protein-related
244944_s_at	ATMG00080;ATMG00090	-1.152	0.002583	[ATMG00080, encodes a mitochondrial ribosomal protein L16, which is a constituent of the large ribosomal subunit];[ATMG00090, ribosomal protein S3]
254193_at	AT4G23870	-1.152	0.003994	unknown protein
256932_at	AT3G22520	-1.152	0.006561	unknown protein
256585_at	AT3G28760	-1.152	0.000502	FUNCTIONS IN: molecular_function unknown; INVOLVED IN: biological_process unknown; LOCATED IN: chloroplast; EXPRESSED IN: 20 plant structures; EXPRESSED DURING: 13 growth stages; CONTAINS InterPro DOMAIN/s: 3-dehydroquinate synthase, prokaryotic-type (InterPro:IPR002812); Has 259 Blast hits to 259 proteins in 76 species: Archae - 86; Bacteria - 48; Metazoa - 0; Fungi - 0; Plants - 39; Viruses - 0…
254378_at	AT4G21810	-1.152	0.006471	DER2.1 (DERLIN-2.1)
259103_at	AT3G11690	-1.152	0.002047	unknown protein
258599_at	AT3G04520	-1.152	0.00287	THA2 (Threonine Aldolase 2); threonine aldolase
251374_at	AT3G60390	-1.152	0.005548	HAT3 (HOMEOBOX-LEUCINE ZIPPER PROTEIN 3); transcription factor
266946_at	AT2G18890	-1.152	0.011226	protein kinase family protein
246975_at	AT5G24890	-1.152	0.006734	unknown protein
248771_at	AT5G47790	-1.152	0.001969	forkhead-associated domain-containing protein / FHA domain-containing protein
263920_at	AT2G36410	-1.12029	0.00786	unknown protein
262914_at	AT1G59750	-1.12029	0.0056	ARF1 (AUXIN RESPONSE FACTOR 1); DNA binding / transcription factor
245383_at	AT4G17810	-1.12029	0.004995	nucleic acid binding / transcription factor/ zinc ion binding
250436_at	AT5G10350	-1.12029	0.001546	polyadenylate-binding protein family protein / PABP family protein
265253_at	AT2G02020	-1.12029	0.002298	proton-dependent oligopeptide transport (POT) family protein
260674_at	AT1G19370	-1.12029	0.003264	unknown protein
261484_at	AT1G14400	-1.12029	0.004216	UBC1 (UBIQUITIN CARRIER PROTEIN 1); ubiquitin-protein ligase
266093_at	AT2G37990	-1.12029	0.001846	ribosome biogenesis regulatory protein (RRS1) family protein
250337_at	AT5G11790	-1.12029	0.010224	Ndr family protein
252378_at	AT3G47570	-1.12029	0.006039	leucine-rich repeat transmembrane protein kinase, putative
265718_at	AT2G03340	-1.12029	0.004331	WRKY3; transcription factor
262980_at	AT1G75680	-1.12029	0.006206	AtGH9B7 (Arabidopsis thaliana glycosyl hydrolase 9B7); catalytic/ hydrolase, hydrolyzing O-glycosyl compounds
250857_at	AT5G04790	-1.12029	0.010221	unknown protein
267129_at	AT2G23380	-1.12029	0.000975	CLF (CURLY LEAF); transcription factor
253900_at	AT4G27130	-1.12029	0.000593	eukaryotic translation initiation factor SUI1, putative
245048_at	ATCG00040	-1.12029	0.012986	Encodes a maturase located in the trnK intron in the chloroplast genome.
265388_s_at	AT2G21010;AT2G20990	-1.12029	0.005188	[AT2G21010, C2 domain-containing protein];[AT2G20990, SYTA (SYNAPTOTAGMIN A)]
262667_at	AT1G62810	-1.12029	0.001021	copper amine oxidase, putative
249034_at	AT5G44160	-1.12029	0.007699	NUC (nutcracker); nucleic acid binding / transcription factor/ zinc ion binding
266427_at	AT2G07170	-1.12029	0.003075	binding
246782_at	AT5G27320	-1.12029	0.003646	GID1C (GA INSENSITIVE DWARF1C); hydrolase
246482_at	AT5G15930	-1.12029	0.003758	PAM1 (plant adhesion molecule 1); RAB GTPase activator
262876_at	AT1G64750	-1.08927	0.001212	ATDSS1(I) (ARABIDOPSIS THALIANA DELETION OF SUV3 SUPRESSOR 1(I))
251075_at	AT5G01890	-1.08927	0.01064	leucine-rich repeat transmembrane protein kinase, putative
257020_at	AT3G19590	-1.08927	0.008498	WD-40 repeat family protein / mitotic checkpoint protein, putative
250938_at	AT5G03180	-1.08927	0.00815	zinc finger (C3HC4-type RING finger) family protein
253663_at	AT4G30160	-1.08927	0.001174	VLN4 (ARABIDOPSIS THALIANA VILLIN 4); actin binding
248608_at	AT5G49460	-1.08927	0.00272	ACLB-2 (ATP CITRATE LYASE SUBUNIT B 2); ATP citrate synthase
257547_at	AT3G13000	-1.08927	0.000756	transcription factor
256331_at	AT1G76880	-1.08927	0.002368	trihelix DNA-binding protein, putative
254154_at	AT4G24460	-1.08927	0.011205	unknown protein
263396_at	AT2G31710	-1.08927	0.003457	unknown protein
265935_at	AT2G19580	-1.08927	0.00037	TET2 (TETRASPANIN2)
266120_at	AT2G02070	-1.08927	0.002185	AtIDD5 (Arabidopsis thaliana Indeterminate(ID)-Domain 5); nucleic acid binding / transcription factor/ zinc ion binding
254705_at	AT4G17870	-1.08927	0.00709	FUNCTIONS IN: molecular_function unknown; INVOLVED IN: biological_process unknown; LOCATED IN: cellular_component unknown; EXPRESSED IN: 25 plant structures; EXPRESSED DURING: 15 growth stages; CONTAINS InterPro DOMAIN/s: Streptomyces cyclase/dehydrase (InterPro:IPR005031); BEST Arabidopsis thaliana protein match is: unknown protein (TAIR:AT5G46790.1); Has 177 Blast hits to 177 proteins in 18 spe…
266372_at	AT2G41310	-1.08927	5.8e-05	ATRR3 (RESPONSE REGULATOR 3); transcription regulator/ two-component response regulator
263714_at	AT2G20610	-1.08927	0.009083	SUR1 (SUPERROOT 1); S-alkylthiohydroximate lyase/ carbon-sulfur lyase/ transaminase
260002_at	AT1G67940	-1.08927	0.002171	ATNAP3; transporter
262176_at	AT1G74960	-1.08927	0.001436	FAB1 (FATTY ACID BIOSYNTHESIS 1); 3-oxoacyl-[acyl-carrier-protein] synthase/ fatty-acid synthase
246345_at	AT3G56760	-1.08927	0.004821	calcium-dependent protein kinase, putative / CDPK, putative
262200_at	AT2G01070	-1.08927	0.000689	FUNCTIONS IN: molecular_function unknown; INVOLVED IN: biological_process unknown; LOCATED IN: endomembrane system, integral to membrane; EXPRESSED IN: 22 plant structures; EXPRESSED DURING: 13 growth stages; CONTAINS InterPro DOMAIN/s: Transmembrane receptor, eukaryota (InterPro:IPR009637); BEST Arabidopsis thaliana protein match is: unknown protein (TAIR:AT1G72480.1); Has 500 Blast hits to 499 …
253858_at	AT4G27600	-1.05889	0.013195	pfkB-type carbohydrate kinase family protein
257611_at	AT3G26580	-1.05889	0.002984	INVOLVED IN: biological_process unknown; LOCATED IN: chloroplast thylakoid membrane; EXPRESSED IN: 23 plant structures; EXPRESSED DURING: 13 growth stages; CONTAINS InterPro DOMAIN/s: Tetratricopeptide region (InterPro:IPR013026); Has 2147 Blast hits to 1154 proteins in 168 species: Archae - 2; Bacteria - 99; Metazoa - 1301; Fungi - 180; Plants - 105; Viruses - 57; Other Eukaryotes - 403 (source:…
249519_at	AT5G38660	-1.05889	0.002357	APE1 (ACCLIMATION OF PHOTOSYNTHESIS TO ENVIRONMENT)
265646_at	AT2G27360	-1.05889	0.002701	lipase, putative
252680_at	AT3G44330	-1.05889	0.01219	INVOLVED IN: protein processing; LOCATED IN: mitochondrion, endoplasmic reticulum, plasma membrane, vacuole; EXPRESSED IN: 25 plant structures; EXPRESSED DURING: 13 growth stages; CONTAINS InterPro DOMAIN/s: Nicalin (InterPro:IPR016574), EF-HAND 1 (InterPro:IPR018247), Nicastrin (InterPro:IPR008710); Has 192 Blast hits to 192 proteins in 79 species: Archae - 6; Bacteria - 5; Metazoa - 124; Fungi …
251559_at	AT3G58010	-1.05889	0.002017	unknown protein
251717_at	AT3G55850	-1.05889	0.007194	LAF3 (LONG AFTER FAR-RED 3); hydrolase/ hydrolase, acting on carbon-nitrogen (but not peptide) bonds
254707_at	AT4G18010	-1.05889	0.003958	AT5PTASE2 (MYO-INOSITOL POLYPHOSPHATE 5-PHOSPHATASE 2); inositol-polyphosphate 5-phosphatase
257406_at	AT1G27060	-1.05889	0.003406	regulator of chromosome condensation (RCC1) family protein
262841_at	AT1G14810	-1.05889	0.002405	semialdehyde dehydrogenase family protein
254485_at	AT4G20760	-1.05889	0.000897	short-chain dehydrogenase/reductase (SDR) family protein
262215_at	AT1G74790	-1.05889	0.002189	catalytic
251112_s_at	AT5G01320;AT5G01330	-1.05889	0.007434	[AT5G01320, pyruvate decarboxylase, putative];[AT5G01330, PDC3 (pyruvate decarboxylase-3); carboxy-lyase/ catalytic/ magnesium ion binding / pyruvate decarboxylase/ thiamin pyrophosphate binding / transferase]
266820_at	AT2G44940	-1.05889	0.006517	AP2 domain-containing transcription factor TINY, putative
261695_at	AT1G08520	-1.05889	0.007168	CHLD; ATP binding / magnesium chelatase/ nucleoside-triphosphatase/ nucleotide binding
244960_at	ATCG01020	-1.05889	0.004382	encodes a chloroplast ribosomal protein L32, a constituent of the large subunit of the ribosomal complex
254928_at	AT4G11410	-1.05889	0.001665	short-chain dehydrogenase/reductase (SDR) family protein
246462_at	AT5G16940	-1.05889	0.005128	carbon-sulfur lyase
250396_at	AT5G10970	-1.05889	0.005079	zinc finger (C2H2 type) family protein
254924_at	AT4G11330	-1.05889	0.009424	ATMPK5 (MAP KINASE 5); MAP kinase/ kinase
260448_at	AT1G72410	-1.05889	0.003941	COP1-interacting protein-related
252127_at	AT3G50960	-1.05889	0.006896	PLP3a (Phosducin-like protein 3 homolog); beta-tubulin binding
266138_at	AT2G28060	-1.05889	0.000476	protein kinase-related
247709_at	AT5G59250	-1.05889	0.003222	sugar transporter family protein
245867_at	AT1G58080	-1.05889	0.001644	ATATP-PRT1 (ATP PHOSPHORIBOSYL TRANSFERASE 1); ATP phosphoribosyltransferase
248393_at	AT5G52060	-1.05889	0.000675	ATBAG1 (ARABIDOPSIS THALIANA BCL-2-ASSOCIATED ATHANOGENE 1); protein binding
246184_at	AT5G20950	-1.05889	0.006033	glycosyl hydrolase family 3 protein
253734_at	AT4G29180	-1.05889	0.011262	leucine-rich repeat protein kinase, putative
256649_at	AT3G13570	-1.05889	0.003084	SCL30a; RNA binding / nucleic acid binding / nucleotide binding
252886_at	AT4G39350	-1.02915	0.007118	CESA2 (CELLULOSE SYNTHASE A2); cellulose synthase/ transferase, transferring glycosyl groups
265101_at	AT1G30880	-1.02915	0.001209	unknown protein
255789_at	AT2G33370	-1.02915	0.002919	60S ribosomal protein L23 (RPL23B)
262758_at	AT1G10780	-1.02915	0.005275	F-box family protein
254073_at	AT4G25500	-1.02915	5.4e-05	ATRSP35; RNA binding / nucleic acid binding / nucleotide binding
261229_at	AT1G20090	-1.02915	0.011019	ROP2 (RHO-RELATED PROTEIN FROM PLANTS 2); GTP binding
245930_at	AT5G09240	-1.02915	0.00167	transcriptional coactivator p15 (PC4) family protein
255552_at	AT4G01850	-1.02915	0.004846	SAM-2 (S-ADENOSYLMETHIONINE SYNTHETASE 2); copper ion binding / methionine adenosyltransferase
264101_at	AT1G79000	-1.02915	0.010033	HAC1 (HISTONE ACETYLTRANSFERASE OF THE CBP FAMILY 1); H3/H4 histone acetyltransferase/ histone acetyltransferase/ transcription cofactor
266789_at	AT2G29020	-1.02915	0.000103	Rab5-interacting family protein
248864_at	AT5G46760	-1.02915	0.002194	basic helix-loop-helix (bHLH) family protein
265480_at	AT2G15970	-1.02915	0.010957	COR413-PM1
255700_at	AT4G00200	-1.02915	0.010133	DNA binding
257923_at	AT3G23160	-1.02915	0.006294	unknown protein
261841_at	AT1G15920	-1.02915	0.007089	CCR4-NOT transcription complex protein, putative
255150_at	AT4G08160	-1.02915	0.006685	glycosyl hydrolase family 10 protein / carbohydrate-binding domain-containing protein
255709_at	AT4G00180	-1.02915	0.011986	YAB3 (YABBY3); protein binding / transcription factor
247213_at	AT5G64900	-1.02915	0.003293	PROPEP1
259080_at	AT3G04910	-1.02915	0.001065	WNK1 (WITH NO LYSINE (K) 1); kinase/ protein kinase/ protein serine/threonine kinase
266095_at	AT2G38050	-1.02915	0.00396	DET2 (DE-ETIOLATED 2); sterol 5-alpha reductase
264526_at	AT1G10130	-1.02915	0.007497	ECA3 (ENDOPLASMIC RETICULUM-TYPE CALCIUM-TRANSPORTING ATPASE 3); calcium-transporting ATPase/ calmodulin binding / manganese-transporting ATPase/ peroxidase
263397_s_at	AT2G31540;AT2G31550	-1.02915	0.000311	[AT2G31540, GDSL-motif lipase/hydrolase family protein];[AT2G31550, GDSL-motif lipase/hydrolase family protein]
264247_at	AT1G60160	-1.02915	0.008079	potassium transporter family protein
245809_at	AT1G58440	-1.02915	0.000437	XF1; squalene monooxygenase
263333_at	AT2G03890	-1.02915	0.004396	phosphatidylinositol 3- and 4-kinase family protein
261726_at	AT1G76270	-1.02915	0.003922	unknown protein
248198_at	AT5G54200	-1.02915	0.01083	WD-40 repeat family protein
250395_at	AT5G10950	-1	0.003083	cylicin-related
258882_at	AT3G06330	-1	0.009703	zinc finger (C3HC4-type RING finger) family protein
245208_at	AT5G12330	-1	0.008363	LRP1 (LATERAL ROOT PRIMORDIUM 1); protein homodimerization
263014_at	AT1G23400	-1	0.012114	CAF2; RNA splicing factor, transesterification mechanism
263591_at	AT2G01910	-1	0.004895	ATMAP65-6; microtubule binding
248001_at	AT5G55990	-1	0.008629	CBL2 (CALCINEURIN B-LIKE 2); calcium ion binding
247506_at	AT5G61960	-1	0.003344	AML1 (ARABIDOPSIS MEI2-LIKE PROTEIN 1); RNA binding / protein binding
252164_at	AT3G50620	-1	0.011682	nodulation protein-related
250125_at	AT5G16390	-1	0.001813	CAC1 (CHLOROPLASTIC ACETYLCOENZYME A CARBOXYLASE 1); acetyl-CoA carboxylase/ biotin binding
260916_at	AT1G02475	-1	0.002158	FUNCTIONS IN: molecular_function unknown; INVOLVED IN: biological_process unknown; LOCATED IN: chloroplast; EXPRESSED IN: 22 plant structures; EXPRESSED DURING: 13 growth stages; CONTAINS InterPro DOMAIN/s: Streptomyces cyclase/dehydrase (InterPro:IPR005031); BEST Arabidopsis thaliana protein match is: unknown protein (TAIR:AT4G01883.1); Has 350 Blast hits to 350 proteins in 105 species: Archae -…
265887_at	AT2G25710	-1	0.008094	HCS1 (HOLOCARBOXYLASE SYNTHASE); biotin-[acetyl-CoA-carboxylase] ligase/ catalytic
246880_s_at	AT5G26000;AT5G25980	-1	0.003015	[AT5G26000, TGG1 (THIOGLUCOSIDE GLUCOHYDROLASE 1); hydrolase, hydrolyzing O-glycosyl compounds / thioglucosidase];[AT5G25980, TGG2 (GLUCOSIDE GLUCOHYDROLASE 2); hydrolase, hydrolyzing O-glycosyl compounds / thioglucosidase]
258816_at	AT3G03960	-1	0.010569	chaperonin, putative
266906_at	AT2G34585	-1	0.003058	unknown protein
263775_at	AT2G46410	-1	0.003704	CPC (CAPRICE); DNA binding / transcription factor
257766_at	AT3G23030	-1	0.012105	IAA2 (INDOLE-3-ACETIC ACID INDUCIBLE 2); transcription factor
255385_at	AT4G03610	-1	0.00632	unknown protein
262686_at	AT1G75990	-1	0.003505	26S proteasome regulatory subunit S3, putative (RPN3)
246466_at	AT5G17010	-1	0.005671	sugar transporter family protein
248302_at	AT5G53160	-1	0.004637	unknown protein
247942_at	AT5G57120	-0.971431	0.012167	FUNCTIONS IN: molecular_function unknown; INVOLVED IN: biological_process unknown; LOCATED IN: nucleolus; EXPRESSED IN: 21 plant structures; EXPRESSED DURING: 13 growth stages; CONTAINS InterPro DOMAIN/s: LisH dimerisation motif (InterPro:IPR006594), SRP40, C-terminal (InterPro:IPR007718); Has 90949 Blast hits to 45608 proteins in 1620 species: Archae - 300; Bacteria - 8281; Metazoa - 37603; Fung…
246520_at	AT5G15790	-0.971431	0.002621	zinc finger (C3HC4-type RING finger) family protein
253035_at	AT4G38240	-0.971431	0.00383	CGL1 (COMPLEX GLYCAN LESS 1); alpha-1,3-mannosylglycoprotein 2-beta-N-acetylglucosaminyltransferase/ protein N-acetylglucosaminyltransferase/ transferase, transferring glycosyl groups
249159_at	AT5G43460	-0.971431	0.004404	lesion inducing protein-related
265476_at	AT2G15570	-0.971431	0.012706	thioredoxin M-type 3, chloroplast (TRX-M3)
256301_at	AT1G69510	-0.971431	0.000511	FUNCTIONS IN: molecular_function unknown; INVOLVED IN: biological_process unknown; LOCATED IN: cellular_component unknown; EXPRESSED IN: 23 plant structures; EXPRESSED DURING: 15 growth stages; CONTAINS InterPro DOMAIN/s: Lg106-like (InterPro:IPR012482); BEST Arabidopsis thaliana protein match is: unknown protein (TAIR:AT5G64130.1); Has 92 Blast hits to 92 proteins in 12 species: Archae - 0; Bact…
258114_at	AT3G14660	-0.971431	0.009178	CYP72A13; electron carrier/ heme binding / iron ion binding / monooxygenase/ oxygen binding
251608_at	AT3G57860	-0.971431	0.002044	UVI4-LIKE (UV-B-INSENSITIVE 4-LIKE)
257912_at	AT3G25500	-0.971431	0.004297	AFH1 (FORMIN HOMOLOGY 1); actin binding / actin filament binding / protein binding
251018_at	AT5G02450	-0.971431	0.004159	60S ribosomal protein L36 (RPL36C)
258541_at	AT3G07000	-0.971431	0.002204	DC1 domain-containing protein
265719_at	AT2G03500	-0.971431	0.005707	myb family transcription factor
246286_at	AT1G31910	-0.971431	0.001283	GHMP kinase family protein
263251_at	AT2G31410	-0.971431	0.012993	unknown protein
259382_s_at	AT3G16430;AT3G16420	-0.971431	0.011795	[AT3G16430, JAL31 (JACALIN-RELATED LECTIN 31); copper ion binding];[AT3G16420, PBP1 (PYK10-BINDING PROTEIN 1); copper ion binding]
261930_at	AT1G22440	-0.971431	0.00182	alcohol dehydrogenase, putative
258642_at	AT3G07910	-0.971431	0.000961	FUNCTIONS IN: molecular_function unknown; INVOLVED IN: biological_process unknown; LOCATED IN: endomembrane system; EXPRESSED IN: 24 plant structures; EXPRESSED DURING: 15 growth stages; CONTAINS InterPro DOMAIN/s: Reactive oxygen species modulator 1 (InterPro:IPR018450); Has 146 Blast hits to 146 proteins in 65 species: Archae - 0; Bacteria - 0; Metazoa - 110; Fungi - 6; Plants - 24; Viruses - 0…
255486_at	AT4G02600	-0.943416	0.007847	MLO1; calmodulin binding
267001_at	AT2G34470	-0.943416	0.002923	UREG (UREASE ACCESSORY PROTEIN G); ATP binding / metal ion binding / nickel ion binding / nucleotide binding
250198_at	AT5G14100	-0.943416	0.001975	ATNAP14; transporter
261039_at	AT1G17455	-0.943416	0.00477	ELF4-L4 (ELF4-Like 4)
251556_at	AT3G58840	-0.943416	0.002	LOCATED IN: mitochondrion, plastid; EXPRESSED IN: 21 plant structures; EXPRESSED DURING: 9 growth stages; BEST Arabidopsis thaliana protein match is: myosin heavy chain-related (TAIR:AT1G06530.1); Has 122842 Blast hits to 54311 proteins in 2061 species: Archae - 1832; Bacteria - 13809; Metazoa - 62057; Fungi - 8845; Plants - 4054; Viruses - 676; Other Eukaryotes - 31569 (source: NCBI BLink).
259220_at	AT3G03550	-0.943416	0.005092	zinc finger (C3HC4-type RING finger) family protein
264222_at	AT1G60230	-0.943416	0.002133	radical SAM domain-containing protein
263947_at	AT2G35820	-0.943416	0.002987	unknown protein
254628_at	AT4G18593	-0.943416	0.005641	dual specificity protein phosphatase-related
258933_at	AT3G09980	-0.943416	0.013174	unknown protein
250291_at	AT5G13280	-0.943416	0.003205	AK-LYS1 (ASPARTATE KINASE 1); aspartate kinase
253141_at	AT4G35440	-0.943416	0.004576	CLC-E (CHLORIDE CHANNEL E); ion channel/ voltage-gated chloride channel
253333_at	AT4G33510	-0.943416	0.011027	DHS2 (3-deoxy-d-arabino-heptulosonate 7-phosphate synthase); 3-deoxy-7-phosphoheptulonate synthase
266819_at	AT2G44870	-0.943416	0.003393	unknown protein
261333_at	AT1G44910	-0.943416	0.00747	protein binding
254188_at	AT4G23920	-0.915936	0.005341	UGE2 (UDP-D-glucose/UDP-D-galactose 4-epimerase 2); UDP-glucose 4-epimerase/ protein dimerization
245948_at	AT5G19540	-0.915936	0.003533	unknown protein
250895_at	AT5G03850	-0.915936	0.002114	40S ribosomal protein S28 (RPS28B)
251672_at	AT3G57230	-0.915936	0.00666	AGL16 (AGAMOUS-LIKE 16); transcription factor
254391_at	AT4G21590	-0.915936	0.010932	ENDO3 (endonuclease 3); T/G mismatch-specific endonuclease/ endonuclease/ nucleic acid binding / single-stranded DNA specific endodeoxyribonuclease
265702_at	AT2G03450	-0.915936	0.010362	PAP9 (PURPLE ACID PHOSPHATASE 9); acid phosphatase/ protein serine/threonine phosphatase
257813_at	AT3G25100	-0.915936	0.01073	CDC45 (cell division cycle 45)
251208_at	AT3G62880	-0.915936	0.004175	ATOEP16-4; P-P-bond-hydrolysis-driven protein transmembrane transporter/ protein transporter
265119_at	AT1G62570	-0.915936	0.005884	FMO GS-OX4 (FLAVIN-MONOOXYGENASE GLUCOSINOLATE S-OXYGENASE 4); 4-methylthiopropyl glucosinolate S-oxygenase/ 8-methylthiopropyl glucosinolate S-oxygenase/ flavin-containing monooxygenase/ monooxygenase
263305_at	AT2G01930	-0.915936	0.008565	BPC1 (BASIC PENTACYSTEINE1); DNA binding / specific transcriptional repressor/ transcription factor
253235_at	AT4G34350	-0.915936	0.001143	HDR (4-HYDROXY-3-METHYLBUT-2-ENYL DIPHOSPHATE REDUCTASE); 4-hydroxy-3-methylbut-2-en-1-yl diphosphate reductase/ 4-hydroxy-3-methylbut-2-en-1-yl diphosphate synthase
264778_at	AT1G08780	-0.915936	0.003561	AIP3 (ABI3-INTERACTING PROTEIN 3); unfolded protein binding
261294_at	AT1G48430	-0.915936	0.0113	dihydroxyacetone kinase family protein
256140_at	AT1G48650	-0.915936	0.0078	helicase domain-containing protein
260882_at	AT1G29280	-0.915936	0.008068	WRKY65; transcription factor
245274_at	AT4G14360	-0.915936	0.009008	dehydration-responsive protein-related
266554_s_at	AT2G46290;AT2G46280	-0.915936	0.000615	[AT2G46290, eukaryotic translation initiation factor 3 subunit 2, putative / eIF-3 beta, putative / eIF3i, putative];[AT2G46280, TRIP-1 (TGF-BETA RECEPTOR INTERACTING PROTEIN 1); nucleotide binding / protein binding]
257698_at	AT3G12730	-0.915936	0.007244	myb family transcription factor
250269_at	AT5G12970	-0.915936	0.006034	C2 domain-containing protein
260182_at	AT1G70750	-0.915936	0.011176	unknown protein
248285_at	AT5G52960	-0.915936	0.001092	unknown protein
266643_s_at	AT2G29730;AT2G29710	-0.915936	8.7e-05	[AT2G29730, UGT71D1 (UDP-GLUCOSYL TRANSFERASE 71D1); UDP-glycosyltransferase/ quercetin 3-O-glucosyltransferase/ transferase, transferring glycosyl groups];[AT2G29710, UDP-glucoronosyl/UDP-glucosyl transferase family protein]
263585_at	AT2G25210	-0.888969	0.006533	60S ribosomal protein L39 (RPL39A)
250916_at	AT5G03630	-0.888969	0.008808	ATMDAR2; monodehydroascorbate reductase (NADH)
247072_at	AT5G66490	-0.888969	0.008886	unknown protein
249126_at	AT5G43380	-0.888969	0.005542	TOPP6; protein serine/threonine phosphatase
267582_at	AT2G41970	-0.888969	0.005552	protein kinase, putative
248181_at	AT5G54290	-0.888969	0.009976	cytochrome c biogenesis protein family
255300_at	AT4G04870	-0.888969	0.006221	CLS (CARDIOLIPIN SYNTHASE); cardiolipin synthase/ phosphatidyltransferase
256661_at	AT3G11964	-0.888969	0.006796	RNA binding
249861_at	AT5G22875	-0.888969	0.000265	unknown protein
263624_at	AT2G04700	-0.888969	0.001689	ferredoxin thioredoxin reductase catalytic beta chain family protein
261131_at	AT1G19835	-0.888969	0.001123	unknown protein
261232_at	AT1G20220	-0.888969	0.002921	nucleic acid binding
249228_at	AT5G42190	-0.888969	0.003	ASK2 (ARABIDOPSIS SKP1-LIKE 2); protein binding / ubiquitin-protein ligase
263665_at	AT1G04480	-0.888969	0.003403	60S ribosomal protein L23 (RPL23A)
248705_at	AT5G48520	-0.862496	0.001533	unknown protein
260530_at	AT2G47320	-0.862496	0.012531	peptidyl-prolyl cis-trans isomerase cyclophilin-type family protein
262000_at	AT1G33810	-0.862496	0.003253	unknown protein
246120_at	AT5G20360	-0.862496	0.000917	octicosapeptide/Phox/Bem1p (PB1) domain-containing protein / tetratricopeptide repeat (TPR)-containing protein
256984_at	AT3G13480	-0.862496	0.010638	unknown protein
246234_at	AT4G37280	-0.862496	0.002113	MRG family protein
258412_at	AT3G17210	-0.862496	0.010855	HS1 (HEAT STABLE PROTEIN 1)
251527_at	AT3G58650	-0.862496	6e-06	unknown protein
252915_at	AT4G38810	-0.862496	0.000547	calcium-binding EF hand family protein
247566_at	AT5G61170	-0.862496	0.008776	40S ribosomal protein S19 (RPS19C)
249103_at	AT5G43600	-0.862496	0.00913	UAH (UREIDOGLYCOLATE AMIDOHYDROLASE); allantoate deiminase/ metallopeptidase
250825_at	AT5G05210	-0.862496	0.003528	nucleolar matrix protein-related
256944_at	AT3G18990	-0.862496	0.010352	VRN1 (REDUCED VERNALIZATION RESPONSE 1); transcription repressor
257128_at	AT3G20080	-0.862496	0.01008	CYP705A15; electron carrier/ heme binding / iron ion binding / monooxygenase/ oxygen binding
253731_at	AT4G29260	-0.862496	0.006237	acid phosphatase class B family protein
267511_at	AT2G45670	-0.862496	0.003363	calcineurin B subunit-related
260629_at	AT1G62330	-0.862496	0.00408	unknown protein
252236_at	AT3G49930	-0.862496	0.006188	zinc finger (C2H2 type) family protein
250179_at	AT5G14440	-0.862496	0.005682	FUNCTIONS IN: molecular_function unknown; INVOLVED IN: biological_process unknown; LOCATED IN: cellular_component unknown; EXPRESSED IN: 21 plant structures; EXPRESSED DURING: 13 growth stages; CONTAINS InterPro DOMAIN/s: Surfeit locus 2 (InterPro:IPR008833); BEST Arabidopsis thaliana protein match is: surfeit locus protein 2 family protein / SURF2 family protein (TAIR:AT5G40570.1); Has 6533 Blas…
263326_at	AT2G04280	-0.862496	0.010558	unknown protein
254131_at	AT4G24740	-0.862496	0.004358	AFC2 (ARABIDOPSIS FUS3-COMPLEMENTING GENE 2); kinase/ protein kinase
264781_at	AT1G08540	-0.836501	0.011554	SIG2 (RNA POLYMERASE SIGMA SUBUNIT 2); DNA binding / DNA-directed RNA polymerase/ sigma factor/ transcription factor
262573_at	AT1G15390	-0.836501	0.001518	PDF1A (PEPTIDE DEFORMYLASE 1A); peptide deformylase
260000_at	AT1G68060	-0.836501	0.008975	ATMAP70-1 (microtubule-associated proteins 70-1); microtubule binding
265777_at	AT2G07340	-0.836501	0.001357	prefoldin-related KE2 family protein
261579_at	AT1G01050	-0.836501	0.002547	AtPPa1 (Arabidopsis thaliana pyrophosphorylase 1); inorganic diphosphatase
264031_at	AT2G03780	-0.836501	0.008712	translin family protein
248155_at	AT5G54390	-0.836501	0.012785	AHL (ARABIDOPSIS HAL2-LIKE); 3'(2'),5'-bisphosphate nucleotidase/ inositol or phosphatidylinositol phosphatase
258212_at	AT3G17920	-0.836501	0.003645	protein binding
259912_at	AT1G72670	-0.836501	0.010741	iqd8 (IQ-domain 8); calmodulin binding
253662_at	AT4G30080	-0.836501	0.003136	ARF16 (AUXIN RESPONSE FACTOR 16); miRNA binding / transcription factor
248232_at	AT5G53760	-0.836501	0.010872	MLO11 (MILDEW RESISTANCE LOCUS O 11); calmodulin binding
260154_at	AT1G52740	-0.836501	0.007601	HTA9 (HISTONE H2A PROTEIN 9); DNA binding
258866_at	AT3G03180	-0.836501	0.009357	Got1-like family protein
246636_at	AT5G34850	-0.836501	0.003163	PAP26 (PURPLE ACID PHOSPHATASE 26); acid phosphatase/ protein serine/threonine phosphatase
247770_at	AT5G58930	-0.836501	0.008385	unknown protein
248582_at	AT5G49910	-0.836501	0.007648	CPHSC70-2EAT SHOCK PROTEIN 70-2 (CHLOROPLAST HEAT SHOCK PROTEIN 70-2); ATP binding / unfolded protein binding
252101_at	AT3G51300	-0.836501	0.002208	ROP1 (RHO-RELATED PROTEIN FROM PLANTS 1); GTP binding / GTPase activating protein binding / GTPase/ protein binding
251661_at	AT3G56950	-0.836501	0.009074	SIP2;1; transporter
259594_at	AT1G28140	-0.810966	2.3e-05	unknown protein
265144_at	AT1G51170	-0.810966	0.011945	protein kinase family protein
260285_at	AT1G80560	-0.810966	0.003209	3-isopropylmalate dehydrogenase, chloroplast, putative
267251_at	AT2G23070	-0.810966	0.00426	casein kinase II alpha chain, putative
263460_at	AT2G31810	-0.810966	0.00906	acetolactate synthase small subunit, putative
254345_at	AT4G22000	-0.810966	0.010159	unknown protein
247552_at	AT5G60920	-0.810966	0.001158	COB (COBRA)
266414_at	AT2G38700	-0.810966	0.005912	MVD1 (MEVALONATE DIPHOSPHATE DECARBOXYLASE 1); diphosphomevalonate decarboxylase/ protein homodimerization
266244_at	AT2G27740	-0.810966	0.010564	unknown protein
257274_at	AT3G14510	-0.810966	0.004881	geranylgeranyl pyrophosphate synthase, putative / GGPP synthetase, putative / farnesyltranstransferase, putative
263516_at	AT2G21600	-0.810966	1e-05	ATRER1B
245629_at	AT1G56580	-0.810966	0.005596	unknown protein
260538_at	AT2G43460	-0.810966	0.002431	60S ribosomal protein L38 (RPL38A)
262498_at	AT1G21710	-0.810966	0.010999	OGG1 (8-OXOGUANINE-DNA GLYCOSYLASE 1); oxidized purine base lesion DNA N-glycosylase
245721_s_at	AT1G73460;AT1G73450	-0.810966	0.011918	[AT1G73460, protein kinase family protein];[AT1G73450, protein kinase, putative]
249577_at	AT5G37710	-0.810966	0.004761	lipase class 3 family protein / calmodulin-binding heat-shock protein, putative
246425_at	AT5G17420	-0.810966	0.005055	IRX3 (IRREGULAR XYLEM 3); cellulose synthase
248903_at	AT5G46290	-0.810966	0.009749	KAS I (3-KETOACYL-ACYL CARRIER PROTEIN SYNTHASE I); catalytic/ fatty-acid synthase/ transferase, transferring acyl groups other than amino-acyl groups
245410_at	AT4G17220	-0.810966	0.003323	ATMAP70-5 (microtubule-associated proteins 70-5); microtubule binding
246564_at	AT5G15610	-0.810966	0.00189	proteasome family protein
260407_at	AT1G69910	-0.810966	0.010675	protein kinase family protein
247978_at	AT5G56710	-0.785875	0.010937	60S ribosomal protein L31 (RPL31C)
255845_at	AT2G33600	-0.785875	0.007579	cinnamoyl-CoA reductase family
247847_at	AT5G58110	-0.785875	0.008551	ATPase activator/ chaperone binding
250462_at	AT5G10020	-0.785875	0.003731	leucine-rich repeat transmembrane protein kinase, putative
251772_at	AT3G55920	-0.785875	0.00075	peptidyl-prolyl cis-trans isomerase, putative / cyclophilin, putative / rotamase, putative
251931_at	AT3G53950	-0.785875	0.010686	glyoxal oxidase-related
260587_at	AT1G53210	-0.785875	0.007146	sodium/calcium exchanger family protein / calcium-binding EF hand family protein
258297_at	AT3G23325	-0.785875	0.002784	splicing factor, putative
259123_at	AT3G02200	-0.785875	0.004914	proteasome family protein
267213_at	AT2G44120	-0.785875	0.013215	60S ribosomal protein L7 (RPL7C)
261552_at	AT1G63430	-0.761213	0.012731	leucine-rich repeat transmembrane protein kinase, putative
251006_at	AT5G02600	-0.761213	0.001021	heavy-metal-associated domain-containing protein
263995_at	no_match	-0.761213	0.008696	no_match
258029_at	AT3G27580	-0.761213	0.013088	ATPK7; kinase/ protein serine/threonine kinase
252713_at	AT3G43810	-0.761213	0.010417	CAM7 (CALMODULIN 7); calcium ion binding
246339_at	AT3G44890	-0.761213	0.007046	RPL9 (RIBOSOMAL PROTEIN L9); structural constituent of ribosome
246050_s_at	AT5G28850;AT5G28900	-0.761213	0.007768	[AT5G28850, calcium-binding EF hand family protein];[AT5G28900, calcium-binding EF hand family protein]
259790_s_at	AT1G29430;AT5G27780	-0.761213	0.000121	[AT1G29430, auxin-responsive family protein];[AT5G27780, auxin-responsive family protein]
253746_at	AT4G29100	-0.761213	0.010654	ethylene-responsive family protein
259882_at	AT1G76670	-0.761213	0.004299	transporter-related
251752_at	AT3G55740	-0.761213	0.013097	PROT2 (PROLINE TRANSPORTER 2); L-proline transmembrane transporter/ amino acid transmembrane transporter
257339_s_at	ATMG00040;AT2G07671;ATMG01080	-0.761213	0.000657	[ATMG00040, hypothetical protein];[AT2G07671, H+-transporting two-sector ATPase, C subunit family protein];[ATMG01080, subunit 9 of mitochondrial F0-ATPase]
256277_at	AT3G12120	-0.761213	0.007733	FAD2 (FATTY ACID DESATURASE 2); delta12-fatty acid dehydrogenase/ omega-6 fatty acid desaturase
266982_at	AT2G39500	-0.761213	0.000459	unknown protein
266925_at	AT2G45740	-0.736966	0.012899	PEX11D
257245_at	AT3G24110	-0.736966	0.007138	calcium-binding EF hand family protein
259380_at	AT3G16340	-0.736966	0.004585	PDR1; ATPase, coupled to transmembrane movement of substances
258515_at	AT3G06650	-0.736966	0.00119	ACLB-1; ATP citrate synthase
253003_s_at	AT4G38300;AT4G38650	-0.736966	0.008804	[AT4G38300, glycosyl hydrolase family 10 protein];[AT4G38650, glycosyl hydrolase family 10 protein]
258698_at	AT3G09690	-0.736966	0.002627	hydrolase, alpha/beta fold family protein
246503_at	AT5G16130	-0.736966	0.012913	40S ribosomal protein S7 (RPS7C)
258616_at	AT3G02880	-0.736966	0.009524	leucine-rich repeat transmembrane protein kinase, putative
250001_at	AT5G18680	-0.736966	0.009065	AtTLP11 (TUBBY LIKE PROTEIN 11); phosphoric diester hydrolase/ transcription factor
253523_at	AT4G31340	-0.736966	0.009628	myosin heavy chain-related
244971_at	ATCG00670	-0.736966	0.011868	Encodes the only ClpP (caseinolytic protease) encoded within the plastid genome. Contains a highly conserved catalytic triad of Ser-type proteases (Ser-His-Asp). Part of the 350 kDa chloroplast Clp complex. The name reflects nomenclature described in Adam et. al (2001).
250015_at	AT5G18070	-0.736966	0.008826	DRT101 (DNA-DAMAGE-REPAIR/TOLERATION 101); intramolecular transferase, phosphotransferases / magnesium ion binding
252601_s_at	AT3G45030;AT5G62300	-0.736966	0.006759	[AT3G45030, 40S ribosomal protein S20 (RPS20A)];[AT5G62300, 40S ribosomal protein S20 (RPS20C)]
265776_at	AT2G07340	-0.713119	0.008417	prefoldin-related KE2 family protein
253280_at	AT4G34110	-0.713119	0.004609	PAB2 (POLY(A) BINDING 2); RNA binding / translation initiation factor
256327_at	AT3G02350	-0.713119	0.000374	GAUT9 (Galacturonosyltransferase 9); polygalacturonate 4-alpha-galacturonosyltransferase/ transferase, transferring glycosyl groups / transferase, transferring hexosyl groups
261854_at	AT1G50670	-0.713119	0.00668	OTU-like cysteine protease family protein
254691_at	AT4G17840	-0.713119	0.008657	unknown protein
250843_at	AT5G04430	-0.713119	0.009551	BTR1L (BINDING TO TOMV RNA 1L (LONG FORM)); nucleic acid binding / single-stranded RNA binding
261040_at	AT1G17370	-0.713119	0.010187	UBP1B (oligouridylate binding protein 1B); mRNA 3'-UTR binding
259450_at	AT1G13870	-0.713119	0.005381	DRL1 (DEFORMED ROOTS AND LEAVES 1); calmodulin binding / purine nucleotide binding
260566_at	AT2G43750	-0.713119	0.006478	OASB (O-ACETYLSERINE (THIOL) LYASE B); cysteine synthase
247156_at	AT5G65760	-0.713119	0.00917	serine carboxypeptidase S28 family protein
258553_at	AT3G06960	-0.68966	0.001144	PDE320 (PIGMENT DEFECTIVE 320)
246347_at	AT3G56830	-0.68966	0.001542	unknown protein
254734_at	AT4G13780	-0.68966	0.003632	methionine--tRNA ligase, putative / methionyl-tRNA synthetase, putative / MetRS, putative
251265_at	AT3G62310	-0.68966	0.002461	RNA helicase, putative
264664_at	AT1G09660	-0.68966	0.004553	KH domain-containing quaking protein, putative
267112_at	AT2G14750	-0.68966	0.011158	APK (APS KINASE); ATP binding / adenylylsulfate kinase/ kinase/ transferase, transferring phosphorus-containing groups
250321_at	AT5G12850	-0.68966	0.011089	zinc finger (CCCH-type) family protein
266257_at	AT2G27820	-0.68966	0.013183	PD1 (PREPHENATE DEHYDRATASE 1); arogenate dehydratase/ prephenate dehydratase
249795_at	AT5G23740	-0.68966	0.003968	RPS11-BETA (RIBOSOMAL PROTEIN S11-BETA); structural constituent of ribosome
266258_at	AT2G27720	-0.68966	0.001022	60S acidic ribosomal protein P2 (RPP2A)
254675_at	AT4G18465	-0.68966	0.000826	RNA helicase, putative
260499_at	AT2G41760	-0.68966	0.001212	unknown protein
259182_at	AT3G01750	-0.68966	0.005604	ankyrin repeat family protein
252316_at	AT3G48700	-0.68966	0.007754	ATCXE13 (ARABIDOPSIS THALIANA CARBOXYESTERASE 13); hydrolase
264855_at	AT2G17265	-0.666576	0.004675	HSK (HOMOSERINE KINASE); homoserine kinase
253139_at	AT4G35450	-0.666576	0.006533	AKR2 (ANKYRIN REPEAT-CONTAINING PROTEIN 2); protein binding
246945_s_at	AT5G25050	-0.666576	0.006886	integral membrane transporter family protein
245818_at	AT1G26100	-0.666576	0.002856	cytochrome B561 family protein
251976_at	AT3G53240	-0.666576	0.012133	AtRLP45 (Receptor Like Protein 45); protein binding
250233_at	AT5G13460	-0.666576	0.00305	IQD11 (IQ-domain 11); calmodulin binding
265857_s_at	AT2G42500;AT3G58500	-0.666576	0.00829	[AT2G42500, PP2A-4; hydrolase/ protein serine/threonine phosphatase];[AT3G58500, PP2A-3 (PROTEIN PHOSPHATASE 2A-3); protein serine/threonine phosphatase]
263256_at	AT1G10500	-0.666576	0.001481	ATCPISCA (chloroplast-localized IscA-like protein); structural molecule
258311_at	AT3G26810	-0.666576	0.000413	AFB2 (AUXIN SIGNALING F-BOX 2); auxin binding / ubiquitin-protein ligase
255657_at	AT4G00810	-0.666576	0.012659	60S acidic ribosomal protein P1 (RPP1B)
245977_at	AT5G13110	-0.666576	0.009132	G6PD2 (GLUCOSE-6-PHOSPHATE DEHYDROGENASE 2); glucose-6-phosphate dehydrogenase
260330_at	AT1G80400	-0.666576	0.010217	zinc finger (C3HC4-type RING finger) family protein
246760_at	AT5G27970	-0.666576	0.009434	binding
249415_at	AT5G39660	-0.666576	0.006105	CDF2 (CYCLING DOF FACTOR 2); DNA binding / protein binding / transcription factor
257849_at	AT3G13060	-0.643856	0.008218	ECT5; FUNCTIONS IN: molecular_function unknown; INVOLVED IN: biological_process unknown; LOCATED IN: cellular_component unknown; EXPRESSED IN: 24 plant structures; EXPRESSED DURING: 15 growth stages; CONTAINS InterPro DOMAIN/s: YT521-B-like protein (InterPro:IPR007275); BEST Arabidopsis thaliana protein match is: ECT2; protein binding (TAIR:AT3G13460.1); Has 994 Blast hits to 952 proteins in 145 …
250383_at	AT5G11480	-0.643856	0.012352	GTP binding
245101_at	AT2G40890	-0.643856	0.012769	CYP98A3 (cytochrome P450, family 98, subfamily A, polypeptide 3); monooxygenase/ p-coumarate 3-hydroxylase
250303_at	AT5G12100	-0.643856	0.007051	pentatricopeptide (PPR) repeat-containing protein
259353_at	AT3G05190	-0.643856	0.01084	aminotransferase class IV family protein
263618_at	AT2G04660	-0.643856	0.012312	APC2; ubiquitin protein ligase binding / ubiquitin-protein ligase
259288_at	AT3G11500	-0.643856	0.000219	small nuclear ribonucleoprotein G, putative / snRNP-G, putative / Sm protein G, putative
259653_at	AT1G55240	-0.643856	0.003813	unknown protein
245404_at	AT4G17610	-0.643856	0.008785	tRNA/rRNA methyltransferase (SpoU) family protein
266256_at	AT2G27710	-0.643856	0.006482	60S acidic ribosomal protein P2 (RPP2B)
263883_at	AT2G21830	-0.643856	0.000683	DC1 domain-containing protein
262824_at	AT1G11650	-0.643856	0.005674	RNA-binding protein 45 (RBP45), putative
250454_at	AT5G09830	-0.621488	0.005446	BolA-like family protein
256075_at	AT1G18150	-0.621488	0.011869	ATMPK8; MAP kinase
258637_at	AT3G07880	-0.621488	0.005568	Rho GDP-dissociation inhibitor family protein
262971_at	AT1G75640	-0.621488	0.00772	leucine-rich repeat family protein / protein kinase family protein
262239_at	AT1G48230	-0.621488	0.005215	phosphate translocator-related
252980_at	AT4G38040	-0.621488	0.003356	exostosin family protein
260497_at	AT2G41840	-0.621488	0.005519	40S ribosomal protein S2 (RPS2C)
262416_at	AT1G49390	-0.621488	0.003015	oxidoreductase, 2OG-Fe(II) oxygenase family protein
250317_at	AT5G12250	-0.621488	0.011422	TUB6 (BETA-6 TUBULIN); structural constituent of cytoskeleton
247396_at	AT5G62930	-0.621488	0.004205	GDSL-motif lipase/hydrolase family protein
256240_at	AT3G12600	-0.621488	0.007536	atnudt16 (Arabidopsis thaliana Nudix hydrolase homolog 16); hydrolase
259754_at	AT1G71090	-0.621488	0.004979	auxin efflux carrier family protein
256385_at	AT1G66580	-0.621488	0.009511	60S ribosomal protein L10 (RPL10C)
255910_at	AT1G18030	-0.599462	0.006537	protein phosphatase 2C, putative / PP2C, putative
253762_at	AT4G28830	-0.599462	0.004299	methyltransferase/ nucleic acid binding
261634_at	AT1G49970	-0.599462	0.012924	CLPR1; serine-type endopeptidase
257628_at	AT3G26290	-0.599462	0.012602	CYP71B26; electron carrier/ heme binding / iron ion binding / monooxygenase/ oxygen binding
258434_at	AT3G16770	-0.599462	0.006666	ATEBP (ETHYLENE-RESPONSIVE ELEMENT BINDING PROTEIN); DNA binding / protein binding / transcription activator/ transcription factor
266205_s_at	AT1G08200;AT2G27860	-0.599462	0.012663	[AT1G08200, AXS2 (UDP-D-APIOSE/UDP-D-XYLOSE SYNTHASE 2); UDP-glucuronate decarboxylase];[AT2G27860, AXS1 (UDP-D-apiose/UDP-D-xylose synthase 1); NAD or NADH binding / UDP-glucuronate decarboxylase]
256419_at	no_match	-0.599462	0.011597	no_match
258562_at	AT3G05980	-0.599462	0.008946	unknown protein
254141_at	AT4G24620	-0.599462	0.001979	PGI1 (PHOSPHOGLUCOSE ISOMERASE 1); glucose-6-phosphate isomerase
244928_s_at	ATMG00570;AT2G07716	-0.599462	0.008623	[ATMG00570, encodes a protein of unknown function. The transcript has extensive RNA editing at the 3' end. Protein has orthologous in other plants and sequence is similar to E. coli ORFs orf154 and orf131, both of unknown function. So far, similar proteins are found only in plants and prokaryotes.];[AT2G07716, pseudogene, similar to orfx, blastp match of 85% identity and 5.5e-116 P-value to GP|28…
247923_at	AT5G57490	-0.599462	0.007747	VDAC4 (VOLTAGE DEPENDENT ANION CHANNEL 4); voltage-gated anion channel
265770_at	AT2G48100	-0.577767	0.012049	exonuclease family protein
258257_at	AT3G26770	-0.577767	0.001516	short-chain dehydrogenase/reductase (SDR) family protein
260369_at	AT1G69620	-0.577767	0.003368	RPL34 (RIBOSOMAL PROTEIN L34); structural constituent of ribosome
249526_at	AT5G38560	-0.577767	0.010861	protein kinase family protein
249947_at	AT5G19200	-0.556393	0.012978	short-chain dehydrogenase/reductase (SDR) family protein
250316_at	AT5G12140	-0.556393	0.010356	ATCYS1 (A. thaliana cystatin-1); cysteine-type endopeptidase inhibitor
263545_at	AT2G21560	-0.556393	0.00947	unknown protein
249733_at	AT5G24400	-0.556393	0.007634	emb2024 (embryo defective 2024); 6-phosphogluconolactonase/ catalytic
260652_at	AT1G32360	-0.556393	0.004254	zinc finger (CCCH-type) family protein
266117_at	AT2G02170	-0.556393	0.004643	remorin family protein
252912_at	AT4G39200	-0.556393	0.007374	40S ribosomal protein S25 (RPS25E)
264224_at	AT1G67440	-0.556393	0.010753	emb1688 (embryo defective 1688); GTP binding / GTPase
253368_at	AT4G33200	-0.535332	0.003528	XI-I; motor/ protein binding
248639_at	AT5G48930	-0.535332	0.002511	HCT (HYDROXYCINNAMOYL-COA SHIKIMATE/QUINATE HYDROXYCINNAMOYL TRANSFERASE); quinate O-hydroxycinnamoyltransferase/ shikimate O-hydroxycinnamoyltransferase/ transferase
245864_at	AT1G58070	-0.535332	0.012328	unknown protein
258314_at	AT3G16100	-0.535332	0.000993	ATRABG3C (ARABIDOPSIS RAB GTPASE HOMOLOG G3C); GTP binding
247260_at	AT5G64500	-0.535332	0.012235	membrane protein-related
247406_at	AT5G62920	-0.535332	0.001168	ARR6 (RESPONSE REGULATOR 6); transcription regulator/ two-component response regulator
260249_s_at	AT1G74290;AT1G74280	-0.535332	0.012028	[AT1G74290, esterase/lipase/thioesterase family protein];[AT1G74280, hydrolase, alpha/beta fold family protein]
256038_at	AT1G19170	-0.514573	0.010054	glycoside hydrolase family 28 protein / polygalacturonase (pectinase) family protein
262613_at	AT1G13960	-0.514573	0.005287	WRKY4; DNA binding / transcription factor
246862_at	AT5G25760	-0.514573	0.012483	PEX4 (PEROXIN4); protein binding / ubiquitin-protein ligase
264816_at	AT1G03560	-0.514573	0.008265	pentatricopeptide (PPR) repeat-containing protein
258585_at	AT3G04340	-0.514573	0.002601	emb2458 (embryo defective 2458); ATP binding / ATPase/ metalloendopeptidase/ nucleoside-triphosphatase/ nucleotide binding
262058_at	AT1G79990	-0.514573	0.005546	protein binding / structural molecule
246512_at	AT5G15630	-0.514573	0.001681	IRX6
262430_s_at	AT1G47550;AT1G47560	-0.494109	0.006504	[AT1G47550, unknown protein];[AT1G47560, unknown protein]
267570_at	AT2G30800	-0.494109	0.004026	HVT1 (HELICASE IN VASCULAR TISSUE AND TAPETUM); ATP binding / helicase/ nucleic acid binding
251708_at	AT3G56580	-0.494109	0.009494	zinc finger (C3HC4-type RING finger) family protein
255305_at	AT4G04770	-0.494109	0.011974	ATABC1 (ATP BINDING CASSETTE PROTEIN 1); ATPase, coupled to transmembrane movement of substances / protein binding / transporter
264715_at	AT1G70180	-0.494109	0.001828	sterile alpha motif (SAM) domain-containing protein
253206_at	AT4G34640	-0.473931	0.008823	SQS1 (SQUALENE SYNTHASE 1); farnesyl-diphosphate farnesyltransferase
245939_at	AT5G19760	-0.473931	0.00139	dicarboxylate/tricarboxylate carrier (DTC)
264665_at	AT1G09660	-0.473931	0.004719	KH domain-containing quaking protein, putative
262341_at	AT1G64230	-0.473931	0.010824	ubiquitin-conjugating enzyme, putative
251001_at	AT5G02670	-0.454032	0.006757	FUNCTIONS IN: molecular_function unknown; INVOLVED IN: biological_process unknown; LOCATED IN: cellular_component unknown; EXPRESSED IN: 21 plant structures; EXPRESSED DURING: 13 growth stages; BEST Arabidopsis thaliana protein match is: polynucleotide adenylyltransferase/ protein binding (TAIR:AT3G06560.1); Has 13 Blast hits to 7 proteins in 2 species: Archae - 0; Bacteria - 0; Metazoa - 0; Fung…
248923_at	AT5G45940	-0.454032	0.004793	atnudt11 (Arabidopsis thaliana Nudix hydrolase homolog 11); hydrolase
256971_at	AT3G21100	-0.454032	0.011254	RNA binding / nucleic acid binding / nucleotide binding
247261_at	AT5G64460	-0.434403	0.009836	FUNCTIONS IN: molecular_function unknown; INVOLVED IN: biological_process unknown; LOCATED IN: cellular_component unknown; EXPRESSED IN: 22 plant structures; EXPRESSED DURING: 13 growth stages; CONTAINS InterPro DOMAIN/s: Phosphoglycerate mutase (InterPro:IPR013078); BEST Arabidopsis thaliana protein match is: unknown protein (TAIR:AT1G58280.3); Has 385 Blast hits to 382 proteins in 84 species: A…
258834_at	AT3G07270	-0.415037	0.00357	GTP cyclohydrolase I
[truncated: 25 more rows]
