# Supplementary material for: Changes in Global Gene Expression in Response to Chemical and Genetic Perturbation of Chromatin Structure
Source: PLoS One. 2011 Jun 3;6(6):e20587. doi: 10.1371/journal.pone.0020587 (PMC3108824; doi:10.1371/journal.pone.0020587)
Supplement: Table S4 — Genes with common regulation between 5-AC treatment experiments. (XLSX) [file pone.0020587.s012.xlsx]

## Sheet: SuppTable4
Table S4. Genes with Common Regulation between 5-AC treatment experiments (Chang and PIkaard, 2005)
Shared 5-AC Upregulated
AT1G09560	GLP5 (GERMIN-LIKE PROTEIN 5); manganese ion binding / nutrient reservoir
AT1G23800	ALDH2B7; 3-chloroallyl aldehyde dehydrogenase/ aldehyde dehydrogenase (NAD)
AT1G25275	unknown protein
AT1G60730	aldo/keto reductase family protein
AT1G61810	BGLU45 (BETA-GLUCOSIDASE 45); catalytic/ cation binding / hydrolase, hydrolyzing O-glycosyl compounds
AT1G67980	CCoAMT; caffeoyl-CoA O-methyltransferase
AT2G31570	ATGPX2 (GLUTATHIONE PEROXIDASE 2); glutathione peroxidase
AT3G14060	unknown protein
AT3G18250	unknown protein
AT3G18830	ATPLT5 (POLYOL TRANSPORTER 5); D-ribose transmembrane transporter/ D-xylose transmembrane transporter/ carbohydrate transmembrane transporter/ galactose transmembrane transporter/ glucose transmembrane transporter/ glycerol transmembrane transporter/ mann
AT3G27060	TSO2 (TSO meaning 'ugly' in Chinese); oxidoreductase/ ribonucleoside-diphosphate reductase/ transition metal ion binding
AT3G48890	ATMP2; heme binding
AT4G01870	tolB protein-related
AT4G03320	tic20-IV (TRANSLOCON AT THE INNER ENVELOPE MEMBRANE OF CHLOROPLASTS 20-IV)
AT4G12470	protease inhibitor/seed storage/lipid transfer protein (LTP) family protein
AT4G37370	CYP81D8; electron carrier/ heme binding / iron ion binding / monooxygenase/ oxygen binding
AT5G13170	SAG29 (SENESCENCE-ASSOCIATED PROTEIN 29)
AT5G13330	Rap2.6L (related to AP2 6L); DNA binding / transcription factor
AT5G17380	pyruvate decarboxylase family protein
AT5G17650	glycine/proline-rich protein
AT5G20960	AAO1 (ARABIDOPSIS ALDEHYDE OXIDASE 1); aldehyde oxidase/ indole-3-acetaldehyde oxidase
AT5G38530	tryptophan synthase-related
AT5G43280	ATDCI1 (DELTA(3,5),DELTA(2,4)-DIENOYL-COA ISOMERASE 1); delta3,5-delta2,4-dienoyl-CoA isomerase/ enoyl-CoA hydratase
Shared 5-AC downregulated
AT1G30870	cationic peroxidase, putative
AT1G32640	MYC2; DNA binding / transcription activator/ transcription factor
AT1G70850	MLP34 (MLP-LIKE PROTEIN 34)
AT2G48140	EDA4 (embryo sac development arrest 4); lipid binding
AT3G12710	methyladenine glycosylase family protein
AT3G23430	PHO1 (phosphate 1)
AT3G47070	unknown protein
AT3G62040	catalytic/ hydrolase
AT3G62550	universal stress protein (USP) family protein
AT3G62680	PRP3 (PROLINE-RICH PROTEIN 3); structural constituent of cell wall
AT3G63160	unknown protein
AT4G14060	major latex protein-related / MLP-related
AT4G40090	AGP3 (arabinogalactan-protein 3)
AT5G01220	SQD2 (sulfoquinovosyldiacylglycerol 2); UDP-glycosyltransferase/ UDP-sulfoquinovose:DAG sulfoquinovosyltransferase/ transferase, transferring glycosyl groups
AT5G23240	DNAJ heat shock N-terminal domain-containing protein
AT5G48000	CYP708A2; oxygen binding / thalianol hydroxylase
AT5G65280	GCL1 (GCR2-LIKE 1); catalytic
