# Supplementary material for: Changes in Global Gene Expression in Response to Chemical and Genetic Perturbation of Chromatin Structure
Source: PLoS One. 2011 Jun 3;6(6):e20587. doi: 10.1371/journal.pone.0020587 (PMC3108824; doi:10.1371/journal.pone.0020587)
Supplement: Table S5 — Overlap between genes upregulated in ddm1 or after 5-AC and other global gene expression studies in chromatin mutants. (XLSX) [file pone.0020587.s013.xlsx]

## Sheet: SuppTable5
Table S5. Overlap between genes upregulated in ddm1 or after 5-AC and other global gene expression studies in chromatin mutants
Genes regulated by ddm1 and mom1 from Habu, et al., 2006	Sig. upregulated after 5-AC	Sig. upregulated in ddm1	log2 5-AC/Ws	log2 ddm1/Ws	Gene description
At1g45145	At1g45145	na	1.79909	na	ATTRX5; oxidoreductase, acting on sulfur group of donors, disulfide as acceptor
At1g73805	At1g73805	na	5.0063	na	calmodulin binding
At3g13790	At3g13790	na	0.85599	na	ATBFRUCT1; beta-fructofuranosidase/ hydrolase, hydrolyzing O-glycosyl compounds
At3g57260	At3g57260	na	7.70853	na	BGL2 (BETA-1,3-GLUCANASE 2); cellulase/ glucan 1,3-beta-glucosidase/ hydrolase, hydrolyzing O-glycosyl compounds
At4g02330	At4g02330	na	4.13175	na	ATPMEPCRB; pectinesterase
At4g04490	At4g04490	na	3.9855	na	protein kinase family protein
At4g10500	At4g10500	na	5.81916	na	oxidoreductase, 2OG-Fe(II) oxygenase family protein
At4g23150	At4g23150	na	3.59335	na	protein kinase family protein
At4g39030	At4g39030	na	2.488	na	EDS5 (ENHANCED DISEASE SUSCEPTIBILITY 5); antiporter/ multidrug efflux pump/ transporter
At5g18470	At5g18470	na	3.06867	na	curculin-like (mannose-binding) lectin family protein
Overexpressed genes in met1 from Zhang, et al., 2006	Sig. upregulated after 5-AC	Sig. upregulated in ddm1	log2 5-AC/Ws	log2 ddm1/Ws	Gene description
At3g57240	At3g57240	na	8.56765	na	BG3 (BETA-1,3-GLUCANASE 3); cellulase/ hydrolase, hydrolyzing O-glycosyl compounds
At3g30396	At3g30396	na	7.63706	na	transposable element gene
At3g31955	At3g31955	na	7.37	na	En/Spm transposon protein, putative similar to En/Spm transposon protein GB:AAD15362 from [Arabidopsis thaliana]
At1g44060	At1g44060	na	6.2538	na	transposable element gene
At4g12470	At4g12470	na	1.72247	na	protease inhibitor/seed storage/lipid transfer protein (LTP) family protein
At2g12980	At2g12980	na	6.68	na	PttA-like transposon protein no ATG identified, related to En/Spm transposon family of maize
At4g25530	At4g25530	na	5.28983	na	FWA; DNA binding / protein binding / protein homodimerization/ transcription factor
At5g60800	At5g60800	na	2.43029	na	heavy-metal-associated domain-containing protein
At4g05640	At4g05640	na	5.51885	na	transposable element gene
At5g01080	At5g01080	At5g01080	3.15	3.93836	putative protein predicted protein, Arabidopsis thaliana
At4g10920	At4g10920	na	0.910733	na	KELP; DNA binding / transcription coactivator/ transcription regulator
At2g13870	At2g13870	na	3.57	na	En/Spm-like transposon protein related to En/Spm transposon family of maize
At1g33130	At1g33130	na	7.16048	na	transposable element gene
At1g39190	At1g39190	At1g39190	3.03	6.26371	hypothetical protein
At4g29200	At4g29200	At4g29200	4.31034	5.00214	beta-galactosidase
At1g43840	At1g43840	At1g43840	4.18507	5.79378	transposable element gene
At1g43920	At1g43920	na	2.15704	na	transposable element gene
At2g15140	At2g15140	na	5.2	na	hypothetical protein similar to hypothetical protein GB:AAC28201
At1g59930	At1g59930	na	2.70266	na	unknown protein
At2g06330	At2g06330	na	3.32625	na	transposable element gene
At4g03790	At4g03790	na	4.75649	na	transposable element gene
At2g13160	At2g13160	na	7.33	na	putative PttA2-like transposon protein related to En/Spm transposon family of maize
At2g10140	At2g10140	At2g10140	4.17393	6.98351	transposable element gene
At4g04430	At4g04430	na	1.20789	na	transposable element gene
At5g24240	At5g24240	na	0.400538	na	phosphatidylinositol 3- and 4-kinase family protein / ubiquitin family protein
At1g36190	At1g36190	At1g36190	5.21	6.05046	unknown protein
At3g30720	At3g30720	na	4.63285	na	QQS (QUA-QUINE STARCH)
Overexpressed genes in drm1 drm2 cmt3 (ddc) from Zhang, et al., 2006	Sig. upregulated after 5-AC	Sig. downregulated after 5-AC	log2 5-AC/Ws	log2 ddm1/Ws	Gene description
At1g14320	At1g14320	na	0.475085	na	SAC52 (SUPPRESSOR OF ACAULIS 52); structural constituent of ribosome
At1g17290	At1g17290	na	2.39	na	alanine aminotransferase, putative similar to alanine aminotransferase GB:AAC62456 GI:3694807 from [Zea mays]
At1g18740	At1g18740	na	0.464668	na	unknown protein
At1g32920	At1g32920	na	2.23266	na	unknown protein
At1g58360	At1g58360	na	0.790772	na	AAP1 (AMINO ACID PERMEASE 1); amino acid transmembrane transporter/ neutral amino acid transmembrane transporter
At1g71880	At1g71880	na	1.84398	na	SUC1 (Sucrose-proton symporter 1); carbohydrate transmembrane transporter/ sucrose:hydrogen symporter/ sugar:hydrogen symporter
At1g74450	At1g74450	na	1.35614	na	unknown protein
At1g76600	At1g76600	na	2.35332	na	unknown protein
At1g80840	At1g80840	na	5.79051	na	WRKY40; transcription factor
At2g19850	At2g19850	na	3.83	na	hypothetical protein predicted by genefinder
At3g02840	At3g02840	na	2.23266	na	immediate-early fungal elicitor family protein
At3g18295	At3g18295	na	1.55582	na	unknown protein
At3g30720	At3g30720	na	4.63285	na	QQS (QUA-QUINE STARCH)
At3g45970	At3g45970	na	5.04308	na	ATEXLA1 (ARABIDOPSIS THALIANA EXPANSIN-LIKE A1)
At3g48130	At3g48130	na	4.53667	na	ribosomal protein L13 homolog
At3g56880	At3g56880	na	2.32481	na	VQ motif-containing protein
At3g57240	At3g57240	na	8.56765	na	BG3 (BETA-1,3-GLUCANASE 3); cellulase/ hydrolase, hydrolyzing O-glycosyl compounds
At3g57450	At3g57450	na	1.43296	na	unknown protein
At3g61190	At3g61190	na	2.77189	na	BAP1 (BON ASSOCIATION PROTEIN 1); phospholipid binding / protein binding
At4g08950	At4g08950	na	2	na	EXO (EXORDIUM)
At4g24570	At4g24570	na	3.14731	na	mitochondrial substrate carrier family protein
At4g27652	At4g27652	na	2.20163	na	unknown protein
At4g28440	At4g28440	na	0.948601	na	DNA-binding protein-related
At4g29780	At4g29780	na	2.86987	na	unknown protein
At5g11740	At5g11740	na	1.9855	na	AGP15 (ARABINOGALACTAN PROTEIN 15)
At5g26030	At5g26030	na	1.60881	na	FC1 (ferrochelatase 1); ferrochelatase
At5g46780	At5g46780	na	1.28096	na	VQ motif-containing protein
At5g64400	At5g64400	na	0.739848	na	FUNCTIONS IN: molecular_function unknown; INVOLVED IN: biological_process unknown; EXPRESSED IN: 25 plant structures; EXPRESSED DURING: 15 growth stages; CONTAINS InterPro DOMAIN/s: CHCH (InterPro:IPR010625); BEST Arabidopsis thaliana protein match is: unknown protein (TAIR:AT5G09570.1); Has 218 Blast hits to 216 proteins in 80 species: Archae - 0; Bacteria - 10; Metazoa - 66; Fungi - 60; Plants …
At5g66070	At5g66070	na	1.96347	na	zinc finger (C3HC4-type RING finger) family protein
At1g11650	na	At1g11650	-0.643856	na	RNA-binding protein 45 (RBP45), putative
At1g11860	na	At1g11860	-4.05889	na	aminomethyltransferase, putative
At1g42970	na	At1g42970	-2.94342	na	GAPB (GLYCERALDEHYDE-3-PHOSPHATE DEHYDROGENASE B SUBUNIT); glyceraldehyde-3-phosphate dehydrogenase (NADP+)/ glyceraldehyde-3-phosphate dehydrogenase
At1g44970	na	At1g44970	-3.47393	na	peroxidase, putative
At1g55260	na	At1g55260	-2.55639	na	lipid binding
At1g71500	na	At1g71500	-1.4344	na	Rieske (2Fe-2S) domain-containing protein
At2g22990	na	At2g22990	-4.05889	na	SNG1 (SINAPOYLGLUCOSE 1); serine-type carboxypeptidase/ sinapoylglucose-malate O-sinapoyltransferase
At2g39470	na	At2g39470	-4.64386	na	PPL2 (PsbP-like protein 2); calcium ion binding
At3g17470	na	At3g17470	-1.88897	na	RelA/SpoT domain-containing protein / calcium-binding EF-hand family protein
At3g60750	na	At3g60750	-1.73697	na	transketolase, putative
At4g31840	na	At4g31840	-3.47393	na	plastocyanin-like domain-containing protein
At4g33510	na	At4g33510	-0.943416	na	DHS2 (3-deoxy-d-arabino-heptulosonate 7-phosphate synthase); 3-deoxy-7-phosphoheptulonate synthase
At4g39200	na	At4g39200	-0.556393	na	40S ribosomal protein S25 (RPS25E)
At5g51750	na	At5g51750	-3.32193	na	ATSBT1.3 (ARABIDOPSIS THALIANA SUBTILASE 1.3); identical protein binding / serine-type endopeptidase
At5g56870	na	At5g56870	-2.94342	na	BGAL4 (beta-galactosidase 4); beta-galactosidase
At5g62360	na	At5g62360	-4.64386	na	invertase/pectin methylesterase inhibitor family protein
At5g66590	na	At5g66590	-3.05889	na	allergen V5/Tpx-1-related family protein
Overexpressed genes in rdr2-1 from Kurihara, et al., 2008	Sig. upregulated after 5-AC	Sig. downregulated after 5-AC	log2 5-AC/Ws	log2 ddm1/Ws	Gene description
AT1G71890	AT1G71890	na	3.88362	na	SUC5; carbohydrate transmembrane transporter/ sucrose:hydrogen symporter/ sugar:hydrogen symporter
AT2G29350	AT2G29350	na	6.12578	na	SAG13; alcohol dehydrogenase/ oxidoreductase
AT3G30720	AT3G30720	na	4.63285	na	QQS (QUA-QUINE STARCH)
AT3G57260	AT3G57260	na	7.70853	na	BGL2 (BETA-1,3-GLUCANASE 2); cellulase/ glucan 1,3-beta-glucosidase/ hydrolase, hydrolyzing O-glycosyl compounds
AT4G10500	AT4G10500	na	5.81916	na	oxidoreductase, 2OG-Fe(II) oxygenase family protein
AT5G13320	AT5G13320	na	7.1419	na	PBS3 (AVRPPHB SUSCEPTIBLE 3)
AT5G24240	AT5G24240	na	0.400538	na	phosphatidylinositol 3- and 4-kinase family protein / ubiquitin family protein
AT1G21140	na	AT1G21140	-1.64386	na	nodulin, putative
AT1G36370	na	AT1G36370	-2.73697	na	SHM7 (serine hydroxymethyltransferase 7); catalytic/ glycine hydroxymethyltransferase/ pyridoxal phosphate binding
AT2G32990	na	AT2G32990	-3.64386	na	AtGH9B8 (Arabidopsis thaliana glycosyl hydrolase 9B8); catalytic/ hydrolase, hydrolyzing O-glycosyl compounds
AT2G40900	na	AT2G40900	-2.25154	na	nodulin MtN21 family protein
AT2G44460	na	AT2G44460	-4.32193	na	BGLU28 (BETA GLUCOSIDASE 28); catalytic/ cation binding / hydrolase, hydrolyzing O-glycosyl compounds
AT3G27170	na	AT3G27170	-2.73697	na	CLC-B (CHLORIDE CHANNEL B); anion channel/ voltage-gated chloride channel
AT3G51240	na	AT3G51240	-2.47393	na	F3H (FLAVANONE 3-HYDROXYLASE); naringenin 3-dioxygenase
AT4G17090	na	AT4G17090	-3.64386	na	CT-BMY (CHLOROPLAST BETA-AMYLASE); beta-amylase
Overexpressed genes in drm1 drm2 cmt3 (ddc) from Kurihara, et al., 2008	Sig. upregulated after 5-AC	Sig. downregulated after 5-AC	log2 5-AC/Ws	log2 ddm1/Ws	Gene description
AT1G24140	AT1G24140	na	2.98185	na	matrixin family protein
AT1G33260	AT1G33260	na	2.40054	na	protein kinase family protein
AT1G80840	AT1G80840	na	5.79051	na	WRKY40; transcription factor
AT2G17040	AT2G17040	na	5.16631	na	anac036 (Arabidopsis NAC domain containing protein 36); transcription factor
AT2G29350	AT2G29350	na	6.12578	na	SAG13; alcohol dehydrogenase/ oxidoreductase
AT2G41190	AT2G41190	na	1.90304	na	amino acid transporter family protein
AT3G22550	AT3G22550	na	3.26153	na	senescence-associated protein-related
AT3G28540	AT3G28540	na	1.95977	na	AAA-type ATPase family protein
AT3G30720	AT3G30720	na	4.63285	na	QQS (QUA-QUINE STARCH)
AT3G50060	AT3G50060	na	2.59216	na	MYB77; DNA binding / transcription factor
AT3G57260	AT3G57260	na	7.70853	na	BGL2 (BETA-1,3-GLUCANASE 2); cellulase/ glucan 1,3-beta-glucosidase/ hydrolase, hydrolyzing O-glycosyl compounds
AT4G10500	AT4G10500	na	5.81916	na	oxidoreductase, 2OG-Fe(II) oxygenase family protein
AT4G24570	AT4G24570	na	3.14731	na	mitochondrial substrate carrier family protein
AT4G29200	AT4G29200	na	4.31034	na	beta-galactosidase
AT5G13170	AT5G13170	na	7.94808	na	SAG29 (SENESCENCE-ASSOCIATED PROTEIN 29)
AT5G13320	AT5G13320	na	7.1419	na	PBS3 (AVRPPHB SUSCEPTIBLE 3)
AT5G24240	AT5G24240	na	0.400538	na	phosphatidylinositol 3- and 4-kinase family protein / ubiquitin family protein
AT5G39670	AT5G39670	na	3.53978	na	calcium-binding EF hand family protein
AT1G07180	na	AT1G07180	-3.18442	na	NDA1 (ALTERNATIVE NAD(P)H DEHYDROGENASE 1); NADH dehydrogenase
AT1G17050	na	AT1G17050	-3.18442	na	SPS2 (Solanesyl diphosphate synthase 2); trans-octaprenyltranstransferase
AT1G64500	na	AT1G64500	-3.47393	na	glutaredoxin family protein
AT1G79270	na	AT1G79270	-3.05889	na	ECT8 (evolutionarily conserved C-terminal region 8)
AT3G02380	na	AT3G02380	-3.32193	na	COL2 (constans-like 2); transcription factor/ zinc ion binding
AT3G19480	na	AT3G19480	-3.64386	na	D-3-phosphoglycerate dehydrogenase, putative / 3-PGDH, putative
AT3G27170	na	AT3G27170	-2.73697	na	CLC-B (CHLORIDE CHANNEL B); anion channel/ voltage-gated chloride channel
AT3G47430	na	AT3G47430	-4.05889	na	PEX11B
AT3G51240	na	AT3G51240	-2.47393	na	F3H (FLAVANONE 3-HYDROXYLASE); naringenin 3-dioxygenase
AT4G04610	na	AT4G04610	-3.32193	na	APR1 (APS REDUCTASE 1); adenylyl-sulfate reductase
AT4G11190	na	AT4G11190	-5.64386	na	disease resistance-responsive family protein / dirigent family protein
AT4G17090	na	AT4G17090	-3.64386	na	CT-BMY (CHLOROPLAST BETA-AMYLASE); beta-amylase
AT5G40390	na	AT5G40390	-2.8365	na	SIP1 (seed imbibition 1-like); galactinol-sucrose galactosyltransferase/ hydrolase, hydrolyzing O-glycosyl compounds
AT5G48850	na	AT5G48850	-6.64386	na	ATSDI1 (SULPHUR DEFICIENCY-INDUCED 1); binding
Overexpressed genes in hog1 from Jordan, et al. 2007	Sig. upregulated after 5-AC	Sig. upregulated in ddm1	log2 5-AC/Ws	log2 ddm1/Ws	Gene description
AT1G19250	AT1G19250	na	4.32697	na	FMO1 (FLAVIN-DEPENDENT MONOOXYGENASE 1); FAD binding / NADP or NADPH binding / electron carrier/ flavin-containing monooxygenase/ monooxygenase/ oxidoreductase
AT2G30770	AT2G30770	na	4.00809	na	CYP71A13 (cytochrome P450, family 71, subfamily A, polypeptide 13); indoleacetaldoxime dehydratase/ oxygen binding
AT3G09520	AT3G09520	na	4.90641	na	ATEXO70H4 (exocyst subunit EXO70 family protein H4); protein binding
AT3G60140	AT3G60140	na	5.09128	na	DIN2 (DARK INDUCIBLE 2); catalytic/ cation binding / hydrolase, hydrolyzing O-glycosyl compounds
AT4G04490	AT4G04490	na	3.9855	na	protein kinase family protein
AT4G29200	AT4G29200	AT4G29200	4.31034	5.00225	beta-galactosidase
AT5G41660	AT5G41660	AT5G41660	2.50843	4.92315	unknown protein
