# Supplementary material for: Changes in Global Gene Expression in Response to Chemical and Genetic Perturbation of Chromatin Structure
Source: PLoS One. 2011 Jun 3;6(6):e20587. doi: 10.1371/journal.pone.0020587 (PMC3108824; doi:10.1371/journal.pone.0020587)
Supplement: Table S6 — Primer sequences for qPCR. (XLSX) [file pone.0020587.s014.xlsx]

## Sheet: SuppTable6
Table S6. Primer sequences for qPCR
At5g09810/ACTIN7	5'-TGGTCGTACAACCGGTATTGT	5'-TTCTGCGGTAGTGGTGAACA
At4g21070/AtBRCA1	5'-AAGCGAGGAGCCATATGAGA	5'-TCCTTTGTAAGCAAGCTCGAA
At3g22880/DMC1	5'-TAATCCTTCGCGTCAGCAAT	5'-TCATAGCTGACCCAGGTGGT
At4g17380/MSH4	5'-TGAACTCGGGAGGGCTACT	5'-CTGTCCATATGGGTTGCAAAT
At2g36490/ROS1	5'-TCAGCCAGTTAAGGACAGAACA	5'-TCATCAGGTTCTCTCTTTTCCAA
At4g34060/DML3	5'-TCGACTAAGAACTGAACATGTGG	5'-GCCAAATCGCAAGAAGGTAA
180rpt F/R	5'-AGCTTCTTCTTGCTTCTCA	5'-GCTGAGGTTTTGTGATTGG
CLV2 bisulfite	5'-CACARCTCARACCAACAACATACAT	5-AGATAGAAGAATATTGAGTAYTTGAA
